# Supplementary material
Source: publisher figshare collection journal article supplement (https://springernature.figshare.com/ndownloader/files/30736244)
Supplement: Supplementary file 1 [file 30736244]

Sample ID,Prey species,Salmon classification,Sample comments,Analyst
PG001,Cymatogaster aggregata,,", vertebra",W. Walker
PG001,unident. Pleuronectidae,,", pharyngeal plate (partial)",W. Walker
PG005,Clupea pallasii,,", vertebrae, atlas, prootic, quadrate, operculum, scapula, epibrachial",W. Walker
PG005,Lumpenus sagitta,,", dentary, vertebra",W. Walker
PG006,Clupea pallasii,,", vertebrae, atlas, gillraker # 1",W. Walker
PG006,Cymatogaster aggregata,,", vertebrae, quadrate, interhyal",W. Walker
PG006,Porichthys notatus,,", vertebrae, pharyngobrachial",W. Walker
PG006,Doryteuthis opalescens,,", beaks",W. Walker
PG007,Oncorhynchus sp.,Juvenile,"smolts / juven. ?, vertebrae (numerous), dentary, quadrate, ceratohyal, lingual plate, hyomandibular ( Age classification based otolith lengths and vertebral size). Vertebrae  ranged from 1.2 - 1.9 mm.",W. Walker
PG007,Clupea pallasii,,", vertebrae, ceratohyal, prootic, scapula, pennultimate vertebra",W. Walker
PG010,Oncorhynchus kisutch,Juvenile,"smolt, vertebrae (numerous), dentary, quadrate, ceratohyal, lingual plate, scapula ( Age classification based otolith lengths and vertebral size). Vertebrae  ranged from 1.3 - 1.6 mm.",W. Walker
PG014,Cymatogaster aggregata,,", vertebrae, atlas, pharyngeal plate, pharyngobrachial",W. Walker
PG014,Porichthys notatus,,", ceratohyal, pharyngobrachial, maxillary, quadrate, interhyal, basihyal, teeth, articular, gillraker 1",W. Walker
PG015,Merluccius productus,,", vertebrae, epihyal",W. Walker
PG015,Lepidogobius lepidus,,", articular",W. Walker
PG016,Clupea pallasii,,", vertebrae, articular, scapula, prootic, quadrate, basihyal, urohyal, gillraker 1 & 2",W. Walker
PG017,Clupea pallasii,,", vertebrae, atlas, prootic,epibrachial, gillraker 1 & 2",W. Walker
PG018,Lepidogobius lepidus,,", vertebrae, atlas, ceratohyal, quadrate, vomer, cleithrum, frontal, hyomandibular, articular, posttemporal, dentary",W. Walker
PG018,Lumpenus sagitta,,", vertebrae, hypohyal 2, pharyngobrachial, quadrate",W. Walker
PG018,unident.elasmobranch,,", vertebrae",W. Walker
PG019,Merluccius productus,,", gillraker 1",W. Walker
PG019,Clupea pallasii,,", vertebrae, epiotic, quadrate, pterotic, articular, ceratohyal, prootic",W. Walker
PG020,Oncorhynchus kisutch,Juvenile,"juveniles, vertebrae (numerous), quadrate, ceratohyal, gillrakers ( Age classification based otolith lengths and vertebral size). Vertebrae  ranged from 3.6 - 4.0 mm.",W. Walker
PG020,Cymatogaster aggregata,,", ceratohyal",W. Walker
PG020,Doryteuthis opalescens,,", beak",W. Walker
PG021,Clupea pallasii,,", vertebrae",W. Walker
PG021,Cymatogaster aggregata,,", ceratohyal",W. Walker
PG021,Leptocottus armatus,,", vertebrae, atlas, ceratohyal, vomer, pharyngeal plate, hypohyal 1, posttemporal, basioccipital, surpracleithrum",W. Walker
PG024,Clupea pallasii,,", vertebrae, prootic, hypohyal 2, gillraker 1",W. Walker
PG025,Oncorhynchus sp.,Juvenile,"juvenile, vertebrae, epibrachials, dentary, articular, basipterygium, opercular ( Age classification based on vertebral size). Vertebrae ranged from 1.6 - 2.3 mm diameter.",W. Walker
PG027,Oncorhynchus kisutch,Juvenile,"smolt?, vertebrae, lingual plate ( Age classification based otolith length and vertebral size). Vertebrae  ranged from 1.3 - 1.5 mm.",W. Walker
PG027,Clupea pallasii,,", vertebrae, prootic, epiotic, epihyal, supracleithrum, ceratohyal, gillraker 1",W. Walker
PG028,Oncorhynchus sp.,Juvenile,"smolt?, vertebrae,ceratohyal, dentary, articular, scapula, quadrate (age classification based on vertebral size). Vertebrae ranged from 1.5 - 1.6 mm.",W. Walker
PG029,unident. teleost,,", unidentifiable bone fragments",W. Walker
PG030,Cymatogaster aggregata,,", vertebrae, ceratohyal, vomer, pharyngeal plate, hypohyal 1 & 2, articular, supracleithrum, basihyal",W. Walker
PG031,Cymatogaster aggregata,,", vertebrae, atlas, ceratohyal, pharyngeal plate, hypohyal 1 & 2, hypobrachial 3, quadrate, articular, supracleithrum, basihyal",W. Walker
PG032,Cymatogaster aggregata,,", vertebrae, atlas, hypohyal 1 & 2, ceratobrachial, dentary, quadrate, basihyal",W. Walker
PG032,Sebastes sp.,,", vertebrae",W. Walker
PG032,Clupea pallasii,,", teeth",W. Walker
PG033,Clupea pallasii,,", vertebrae, atlas, prootic, ceratohyal, prootic, epiotic, scapula, hypohyal, opercular, gillrakers 1 & 2",W. Walker
PG034,Clupea pallasii,,", vertebrae, atlas, dentary, supracleithrum, pharyngobrachial, quadrate, epibrachial",W. Walker
PG034,Cymatogaster aggregata,,", vertebrae, articular, hypobrachial, posttemporal",W. Walker
PG034,Oncorhynchus sp.,Adult,"sub adult?, pectoral fin rays, teeth, basihyal, vertebral fragments (7.5 mm+ in diameter). Age classification based on large size of all elements.",W. Walker
PG035,Leptocottus armatus,,", vertebrae, pharyngeal plate, hypohyal, pharyngobrachial, basioccipital, articular",W. Walker
PG036,Clupea pallasii,,", vertebrae, atlas, suboperculum, prootic, gillraker 1",W. Walker
PG036,Cymatogaster aggregata,,", vertebrae, hyomandibular, basihyal, articular, supracleithrum",W. Walker
PG036,Leptocottus armatus,,", vertebrae, premaxillary, hypohyal 2, ceratohyal, quadrate, dentary, basioccipital, articular",W. Walker
PG036,Lepidogobius lepidus,,", vertebrae, hyomandibular, premaxillary, ceratohyal, maxillary, parasphenoid, basioccipital, hypohyal 2, articular",W. Walker
PG037,Clupea pallasii,,", hypohyal, gillraker # 1",W. Walker
PG037,Oncorhynchus sp.,Juvenile,"juvenile ?, Pectoral fin ray and general salmon bone fragments from medium -size juvenile fish. (not smolt)",W. Walker
PG038,Clupea pallasii,,", vertebrae, prootic, operculum, hypohyal, articular, dentary, ceratohyal, hyomandibular, suboperculum",W. Walker
PG039,Cymatogaster aggregata,,", vertebrae, atlas, quadrate, pharyngobrachial, basihyal, supracleithrum, hypobrachial, scapula, pharengeal plate, dentary, epibrachial, ceratohyal",W. Walker
PG040,Clupea pallasii,,", vertebrae, prootic, quadrate, hypohyal 2, operculum, dentary, gillraker 2",W. Walker
PG041,Clupea pallasii,,", vertebrae, atlas, prootic, operculum, hypohyal, pterotic",W. Walker
PG042,Oncorhynchus sp.,Adult,"sub adult?, partial vertebra, teeth, partial maxillary, gillrakers (age classification based on large size of all elements)",W. Walker
PG042,Clupea pallasii,,", vertebrae, pleural rib, gillraker 1 ",W. Walker
PG043,Clupea pallasii,,", basihyal, gillraker 1 ",W. Walker
PG043,Cymatogaster aggregata,,", vertebrae,  articular, epihyal, pharyngobrachial, hypohyal",W. Walker
PG044,Cymatogaster aggregata,,", vertebrae, atlas, pharyngeal plate, pharyngobrachial, ",W. Walker
PG044,Clupea pallasii,,", vertebrae, atlas, prootic, gillraker # 1",W. Walker
PG044,Microgadus proximus,,", ",W. Walker
PG045,Porichthys notatus,,", pharyngobrachial, dentary, teeth, ceratohyal, interhyal, angular",W. Walker
PG046,Oncorhynchus sp.,Juvenile,"juvenile, pectoral fin ray, articulr, suborbital, gillrakers (age classification based on size of all elements)",W. Walker
PG046,Lepidogobius lepidus,,", vertebrae",W. Walker
PG046,Clupea pallasii,,"Juvenile, gillraker # 1 from medium-size fish (not smolt).",W. Walker
PG047,Oncorhynchus sp.,Juvenile,"Juvenile, vertebrae,ceratohyal, quadrate, basipterygium, hypohyal, hyomandibular (age classification based on vertebral size). Vertebrae ranged from 2.0 - 2.6 mm.",W. Walker
PG047,Clupea pallasii,,", vertebrae, atlas, prootic, hypohyal, articular, quadrate, gillraker 1",W. Walker
PG047,Doryteuthis opalescens,,", beak",W. Walker
PG048,Clupea pallasii,,", vertebra, pleural ribs, gillrakers # 1 & 2",W. Walker
PG048,Engraulis mordax,,", vertebrae",W. Walker
PG048,Leptocottus armatus,,", vertebrae, preopercular spines",W. Walker
PG048,Oncorhynchus sp.,Juvenile," large Juvenile, radial, teeth, gillrakers (age classification based on size of all elements)",W. Walker
PG048,Cymatogaster aggregata,,", vertebrae, atlas, pharyngeal plate, dorsal spine",W. Walker
PG048,unident. Osmeridae,,", pectoral fin ray",W. Walker
PG049,Oncorhynchus sp.,Adult,"adult ?, pectoral fin ray, articular, gillrakers (age classification based on large size of all elements)",W. Walker
PG050,Merluccius productus,,", ",W. Walker
PG050,Gadus chalcogramma,,", ",W. Walker
PG050,Clupea pallasii,,", vertebrae, atlas, prootic, opercular, quadrate, gillraker 1",W. Walker
PG050,Microgadus proximus,,", vertebrae, dentary",W. Walker
PG050,Cymatogaster aggregata,,", vertebrae, atlas, pharyngobrachial, pharyngeal plate, basihyal, ",W. Walker
PG050,Doryteuthis opalescens,,", beaks",W. Walker
PG051,Clupea pallasii,,", vertebrae, atlas, prootic",W. Walker
PG051,Cymatogaster aggregata,,", vertebrae, atlas, pharyngobrachial, pharyngeals, basihyal, basibrachial, dentary, epibrachials, hypobrachial, vomer",W. Walker
PG051,Microgadus proximus,,", vertebrae, dentary",W. Walker
PG052,Clupea pallasii,,", vertebrae, atlas, prootic, hypohyal 1 & 2, quadrate, opercular, penultimate vertebra, preopercular, hyomandibular, pterotic, articular, ceratohyal, posttemporal, ",W. Walker
PG053,Clupea pallasii,,", vertebrae, gillraker 1",W. Walker
PG053,Oncorhynchus sp.,Juvenile,"small juvenile, tooth, gillraker (age classification based on small size of both elements)",W. Walker
Pv12.001,Bathylagid spp.,,", ",M. Lance
Pv12.001,Oncorhynchus spp.,,", ",M. Lance
Pv12.001,Merluccius productus,,", ",M. Lance
Pv12.001,Clupeid spp.,,", ",M. Lance
Pv12.002,Galiteuthis spp.,,", ",M. Lance
Pv12.002,Citharichthys stigmaeus,,", ",M. Lance
Pv12.002,Citharichthys stigmaeus,,", ",M. Lance
Pv12.002,Citharichthys stigmaeus,,", ",M. Lance
Pv12.003,Osmerid spp.,,", ",M. Lance
Pv12.003,Osmerid spp.,,", cf capelin",M. Lance
Pv12.004,Gadid or Merluccid,,", ",M. Lance
Pv12.004,Clupeid spp.,,", ",M. Lance
Pv12.004,Osmerid spp.,,", cf capelin",M. Lance
Pv12.004,Oncorhynchus spp.,Adult,", adult",M. Lance
Pv12.005,Platichthys stellatus,,", ",M. Lance
Pv12.005,Platichthys stellatus,,", ",M. Lance
Pv12.005,Platichthys stellatus,,", ",M. Lance
Pv12.005,Pleuronectes vetulus,,", ",M. Lance
Pv12.005,Pleuronectes vetulus,,", ",M. Lance
Pv12.005,Rajid spp.,,", ",M. Lance
Pv12.005,Zoarcid spp.,,", ",M. Lance
Pv12.005,Zoarcid spp.,,", ",M. Lance
Pv12.005,Zoarcid spp.,,", ",M. Lance
Pv12.006,Oncorhynchus spp.,Adult,", adult",M. Lance
Pv12.006,Galiteuthis spp.,,", ",M. Lance
Pv12.007,Merluccius productus,,", ",M. Lance
Pv12.007,Merluccius productus,,", ",M. Lance
Pv12.007,Platichthys stellatus,,", ",M. Lance
Pv12.008,Unidentified flatfish,,", ",M. Lance
Pv12.008,Merluccius productus,,", ",M. Lance
Pv12.008,Merluccius productus,,", ",M. Lance
Pv12.008,Merluccius productus,,", ",M. Lance
Pv12.008,Citharichthys stigmaeus,,", ",M. Lance
Pv12.008,Citharichthys stigmaeus,,", ",M. Lance
Pv12.008,Sardinops sagax,,", ",M. Lance
Pv12.008,Platichthys stellatus,,", ",M. Lance
Pv12.008,Osmerid spp.,,", ",M. Lance
Pv12.008,Osmerid spp.,,", ",M. Lance
Pv12.008,Osmerid spp.,,", ",M. Lance
Pv12.009,Bathylagid spp.,,", ",M. Lance
Pv12.009,Clupeid spp.,,", ",M. Lance
Pv12.009,Labrid spp.,,", ",M. Lance
Pv12.009,Leuresthes tenuis,,", ",M. Lance
Pv12.009,Leuresthes tenuis,,", ",M. Lance
Pv12.009,Leuresthes tenuis,,", ",M. Lance
Pv12.009,Thaleichthys pacificus,,", ",M. Lance
Pv12.009,Thaleichthys pacificus,,", ",M. Lance
Pv12.009,Thaleichthys pacificus,,", ",M. Lance
Pv12.010,Oncorhynchus spp.,Adult,", adult",M. Lance
Pv12.010,Clupeid spp.,,", ",M. Lance
Pv12.010,Osmerid spp.,,", ",M. Lance
Pv12.010,Sardinops sagax,,", ",M. Lance
Pv12.011,Clupeid spp.,,", ",M. Lance
Pv12.011,Osmerid spp.,,", ",M. Lance
Pv12.012,Bathylagid spp.,,", ",M. Lance
Pv12.012,Clupeid spp.,,", ",M. Lance
Pv12.012,Myxinid species,,", v eroded, poss PLESPP",M. Lance
Pv12.013,Citharichthys stigmaeus,,", ",M. Lance
Pv12.013,Citharichthys stigmaeus,,", ",M. Lance
Pv12.013,Sardinops sagax,,", ",M. Lance
Pv12.013,Osmerid spp.,,", ",M. Lance
Pv12.014,Osmerid spp.,,", ",M. Lance
Pv12.016,Alosa sapidissima,,", ",M. Lance
Pv12.016,Alosa sapidissima,,", ",M. Lance
Pv12.016,Oncorhynchus tshawytscha,Juvenile,", juv",M. Lance
Pv12.016,Citharichthys stigmaeus,,", ",M. Lance
Pv12.016,Citharichthys stigmaeus,,", ",M. Lance
Pv12.016,Citharichthys stigmaeus,,", ",M. Lance
Pv12.017,Alosa sapidissima,,", ",M. Lance
Pv12.017,Alosa sapidissima,,", ",M. Lance
Pv12.017,Alosa sapidissima,,", ",M. Lance
Pv12.017,Citharichthys stigmaeus,,", ",M. Lance
Pv12.017,Citharichthys stigmaeus,,", ",M. Lance
Pv12.017,Ommasteuthid spp.,,", juv",M. Lance
Pv12.017,Ommasteuthid spp.,,", juv",M. Lance
Pv12.017,Ommasteuthid spp.,,", juv",M. Lance
Pv12.017,Cyclopterid spp.,,", ",M. Lance
Pv12.017,Cyclopterid spp.,,", ",M. Lance
Pv12.017,Cyclopterid spp.,,", ",M. Lance
Pv12.017,Stichaeid spp.,,", ",M. Lance
Pv12.017,Stichaeid spp.,,", ",M. Lance
Pv12.017,Stichaeid spp.,,", ",M. Lance
Pv12.019,Citharichthys stigmaeus,,", ",M. Lance
Pv12.020,Citharichthys stigmaeus,,", ",M. Lance
Pv12.020,Citharichthys stigmaeus,,", ",M. Lance
Pv12.020,Citharichthys stigmaeus,,", ",M. Lance
Pv12.021,Citharichthys stigmaeus,,", ",M. Lance
Pv12.021,Citharichthys stigmaeus,,", ",M. Lance
Pv12.022,Citharichthys stigmaeus,,", ",M. Lance
Pv12.022,Citharichthys stigmaeus,,", ",M. Lance
Pv12.022,Citharichthys stigmaeus,,", ",M. Lance
Pv12.026,Citharichthys stigmaeus,,", ",M. Lance
Pv12.026,Citharichthys stigmaeus,,", ",M. Lance
Pv12.026,Citharichthys stigmaeus,,", ",M. Lance
Pv12.026,Alosa sapidissima,,", ",M. Lance
Pv12.027,Diaphus theta,,", ",M. Lance
Pv12.027,Diaphus theta,,", ",M. Lance
Pv12.027,Diaphus theta,,", ",M. Lance
Pv12.027,Galiteuthis spp.,,", ",M. Lance
Pv12.027,Citharichthys stigmaeus,,", ",M. Lance
Pv12.027,Citharichthys stigmaeus,,", ",M. Lance
Pv12.027,Citharichthys stigmaeus,,", ",M. Lance
Pv12.027,Citharichthys stigmaeus,,", ",M. Lance
Pv12.028,Gadid or Merluccid,,", ",M. Lance
Pv12.028,Gadid or Merluccid,,", ",M. Lance
Pv12.030,Ommasteuthid spp.,,", juv",M. Lance
Pv12.030,Ommasteuthid spp.,,", juv",M. Lance
Pv12.030,Clupeid spp.,,", ",M. Lance
Pv12.030,Ommasteuthid spp.,,", juv",M. Lance
Pv12.031,Citharichthys stigmaeus,,", ",M. Lance
Pv12.031,Citharichthys stigmaeus,,", ",M. Lance
Pv12.031,Citharichthys stigmaeus,,", ",M. Lance
Pv12.032,Citharichthys stigmaeus,,", ",M. Lance
Pv12.032,Citharichthys stigmaeus,,", ",M. Lance
Pv12.032,Citharichthys stigmaeus,,", ",M. Lance
Pv12.033,Alosa sapidissima,,", ",M. Lance
Pv12.033,Clupeid spp.,,", ",M. Lance
Pv12.034,Citharichthys stigmaeus,,", ",M. Lance
Pv12.034,Citharichthys stigmaeus,,", ",M. Lance
Pv12.034,Citharichthys stigmaeus,,", ",M. Lance
Pv12.034,Galiteuthis spp.,,", ",M. Lance
Pv12.035,Citharichthys stigmaeus,,", ",M. Lance
Pv12.035,Citharichthys stigmaeus,,", ",M. Lance
Pv12.035,Galiteuthis spp.,,", ",M. Lance
Pv12.037,Diaphus theta,,", ",M. Lance
Pv12.037,Diaphus theta,,", ",M. Lance
Pv12.037,Diaphus theta,,", ",M. Lance
Pv12.037,Cyclopterid spp.,,", ",M. Lance
Pv12.037,Cyclopterid spp.,,", ",M. Lance
Pv12.037,Cyclopterid spp.,,", ",M. Lance
Pv12.037,Citharichthys stigmaeus,,", ",M. Lance
Pv12.037,Citharichthys stigmaeus,,", ",M. Lance
Pv12.037,Citharichthys stigmaeus,,", ",M. Lance
Pv12.038,Myxinid species,,", ",M. Lance
Pv12.039,Platichthys stellatus,,", ",M. Lance
Pv12.040,Sardinops sagax,,", ",M. Lance
Pv12.040,Citharichthys stigmaeus,,", ",M. Lance
Pv12.040,Citharichthys stigmaeus,,", ",M. Lance
Pv12.040,Citharichthys stigmaeus,,", ",M. Lance
Pv12.040,Galiteuthis spp.,,", ",M. Lance
Pv12.041,Galiteuthis spp.,,", ",M. Lance
Pv12.042,Galiteuthis spp.,,", ",M. Lance
Pv12.042,Citharichthys stigmaeus,,", ",M. Lance
Pv12.042,Citharichthys stigmaeus,,", ",M. Lance
Pv12.042,Citharichthys stigmaeus,,", ",M. Lance
Pv12.042,Oncorhynchus spp.,Adult,", med, adult?",M. Lance
Pv12.043,Citharichthys stigmaeus,,", ",M. Lance
Pv12.044,Rajid spp.,,", ",M. Lance
Pv12.044,Myxinid species,,", ",M. Lance
Pv12.045,Myxinid species,,", ",M. Lance
Pv12.047,Myxinid species,,", ",M. Lance
Pv12.048,Galiteuthis spp.,,", ",M. Lance
Pv12.048,Gadid or Merluccid,,", ",M. Lance
Pv12.049,Rajid spp.,,", ",M. Lance
Pv12.050,Bathylagid spp.,,", ",M. Lance
Pv12.050,Bathylagid spp.,,", ",M. Lance
Pv12.050,Bathylagid spp.,,", ",M. Lance
Pv12.050,Thaleichthys pacificus,,", ",M. Lance
Pv12.050,Thaleichthys pacificus,,", ",M. Lance
Pv12.050,Thaleichthys pacificus,,", ",M. Lance
Pv12.050,Citharichthys stigmaeus,,", ",M. Lance
Pv12.050,Citharichthys stigmaeus,,", ",M. Lance
Pv12.051,Labrid spp.,,", ",M. Lance
Pv12.051,Clupeid spp.,,", ",M. Lance
Pv12.051,Myxinid species,,", few, v lg, v eroded",M. Lance
Pv12.052,Clupeid spp.,,", cf SARSAG",M. Lance
Pv12.053,Citharichthys stigmaeus,,", ",M. Lance
Pv12.053,Oncorhynchus spp.,Adult,", adult",M. Lance
Pv12.054,Thaleichthys pacificus,,", ",M. Lance
Pv12.054,Thaleichthys pacificus,,", ",M. Lance
Pv12.055,Thaleichthys pacificus,,", ",M. Lance
Pv12.055,Thaleichthys pacificus,,", ",M. Lance
Pv12.055,Thaleichthys pacificus,,", ",M. Lance
Pv12.057,Myxinid species,,", ",M. Lance
Pv12.058,Citharichthys stigmaeus,,", ",M. Lance
Pv12.058,Trichodon trichodon,,", ",M. Lance
Pv12.058,Oncorhynchus tshawytscha,Juvenile,", juv",M. Lance
Pv12.058,Gadid or Merluccid,,", ",M. Lance
Pv12.058,Gadid or Merluccid,,", ",M. Lance
Pv12.058,Gadid or Merluccid,,", ",M. Lance
Pv12.061,Clupeid spp.,,", ",M. Lance
Pv12.062,Citharichthys stigmaeus,,", ",M. Lance
Pv12.063,Oncorhynchus tshawytscha,Juvenile,", juv",M. Lance
Pv12.064,Thaleichthys pacificus,,", ",M. Lance
Pv12.064,Thaleichthys pacificus,,", ",M. Lance
Pv12.064,Thaleichthys pacificus,,", ",M. Lance
Pv12.065,Unidentified flatfish,,", ",M. Lance
Pv12.065,Citharichthys stigmaeus,,", ",M. Lance
Pv12.065,Citharichthys stigmaeus,,", ",M. Lance
Pv12.065,Citharichthys stigmaeus,,", ",M. Lance
Pv12.065,Thaleichthys pacificus,,", ",M. Lance
Pv12.065,Thaleichthys pacificus,,", ",M. Lance
Pv12.066,Citharichthys stigmaeus,,", ",M. Lance
Pv12.066,Citharichthys stigmaeus,,", ",M. Lance
Pv12.066,Citharichthys stigmaeus,,", ",M. Lance
Pv12.067,Thaleichthys pacificus,,", ",M. Lance
Pv12.067,Thaleichthys pacificus,,", ",M. Lance
Pv12.067,Thaleichthys pacificus,,", ",M. Lance
Pv12.068,Gadid or Merluccid,,", ",M. Lance
Pv12.069,Citharichthys stigmaeus,,", ",M. Lance
Pv12.069,Gadid or Merluccid,,", ",M. Lance
Pv12.070,Citharichthys stigmaeus,,", ",M. Lance
Pv12.070,Citharichthys stigmaeus,,", ",M. Lance
Pv12.070,Citharichthys stigmaeus,,", ",M. Lance
Pv12.071,Thaleichthys pacificus,,", ",M. Lance
Pv12.071,Thaleichthys pacificus,,", ",M. Lance
Pv12.071,Thaleichthys pacificus,,", ",M. Lance
Pv12.072,Myxinid species,,", ",M. Lance
Pv12.073,Alosa sapidissima,,", ",M. Lance
Pv12.074,Citharichthys stigmaeus,,", ",M. Lance
Pv12.074,Citharichthys stigmaeus,,", ",M. Lance
Pv12.074,Alosa sapidissima,,", ",M. Lance
Pv12.074,Merluccius productus,,", ",M. Lance
Pv12.074,Merluccius productus,,", ",M. Lance
Pv12.074,Merluccius productus,,", ",M. Lance
Pv12.074,Oncorhynchus tshawytscha,Juvenile,", juv",M. Lance
Pv12.075,Citharichthys stigmaeus,,", ",M. Lance
Pv12.075,Citharichthys stigmaeus,,", ",M. Lance
Pv12.075,Citharichthys stigmaeus,,", ",M. Lance
Pv12.075,Citharichthys stigmaeus,,", ",M. Lance
Pv12.075,Merluccius productus,,", ",M. Lance
Pv12.075,Merluccius productus,,", ",M. Lance
Pv12.075,Merluccius productus,,", ",M. Lance
Pv12.075,Oncorhynchus tshawytscha,Juvenile,", juv",M. Lance
Pv12.075,Thaleichthys pacificus,,", ",M. Lance
Pv12.075,Thaleichthys pacificus,,", ",M. Lance
Pv12.075,Thaleichthys pacificus,,", ",M. Lance
Pv12.076,Citharichthys stigmaeus,,", ",M. Lance
Pv12.076,Citharichthys stigmaeus,,", ",M. Lance
Pv12.076,Citharichthys stigmaeus,,", ",M. Lance
Pv12.077,Gadid or Merluccid,,", ",M. Lance
Pv12.078,Stichaeid spp.,,", ",M. Lance
Pv12.078,Stichaeid spp.,,", ",M. Lance
Pv12.078,Stichaeid spp.,,", ",M. Lance
Pv12.078,Citharichthys stigmaeus,,", ",M. Lance
Pv12.079,Alosa sapidissima,,", ",M. Lance
Pv12.079,Clupeid spp.,,", ",M. Lance
Pv12.080,Ommasteuthid spp.,,", juv",M. Lance
Pv12.080,Ommasteuthid spp.,,", juv",M. Lance
Pv12.080,Ommasteuthid spp.,,", juv",M. Lance
Pv12.080,Citharichthys stigmaeus,,", ",M. Lance
Pv12.080,Alosa sapidissima,,", ",M. Lance
Pv12.080,Alosa sapidissima,,", ",M. Lance
Pv12.081,Gadid or Merluccid,,", ",M. Lance
Pv12.081,Clupeid spp.,,", ",M. Lance
Pv12.082,Ommasteuthid spp.,,", juv",M. Lance
Pv12.082,Ommasteuthid spp.,,", juv",M. Lance
Pv12.082,Oncorhynchus tshawytscha,Juvenile,", juv",M. Lance
Pv12.082,Oncorhynchus tshawytscha,Juvenile,", juv",M. Lance
Pv12.083,Stichaeid spp.,,", ",M. Lance
Pv12.083,Stichaeid spp.,,", ",M. Lance
Pv12.083,Stichaeid spp.,,", ",M. Lance
Pv12.083,Merluccius productus,,", ",M. Lance
Pv12.083,Merluccius productus,,", ",M. Lance
Pv12.084,Citharichthys stigmaeus,,", ",M. Lance
Pv12.084,Citharichthys stigmaeus,,", ",M. Lance
Pv12.084,Citharichthys stigmaeus,,", ",M. Lance
Pv12.085,Unidentified flatfish,,", ",M. Lance
Pv12.086,Merluccius productus,,", ",M. Lance
Pv12.086,Merluccius productus,,", ",M. Lance
Pv12.086,Merluccius productus,,", ",M. Lance
Pv12.086,Clupeid spp.,,", ",M. Lance
Pv12.087,Oncorhynchus tshawytscha,Juvenile,", juv",M. Lance
Pv12.087,Oncorhynchus tshawytscha,Juvenile,", juv",M. Lance
Pv12.087,Oncorhynchus tshawytscha,Juvenile,", juv",M. Lance
Pv12.087,Oncorhynchus tshawytscha,Juvenile,", juv",M. Lance
Pv12.087,Oncorhynchus tshawytscha,Juvenile,", juv",M. Lance
Pv12.088,Ommasteuthid spp.,,", juv",M. Lance
Pv12.088,Ommasteuthid spp.,,", juv",M. Lance
Pv12.088,Oncorhynchus tshawytscha,Juvenile,", juv",M. Lance
Pv12.088,Oncorhynchus tshawytscha,Juvenile,", juv",M. Lance
Pv12.088,Citharichthys stigmaeus,,", ",M. Lance
Pv12.088,Citharichthys stigmaeus,,", ",M. Lance
Pv12.089,Citharichthys stigmaeus,,", ",M. Lance
Pv12.089,Citharichthys stigmaeus,,", ",M. Lance
Pv12.089,Citharichthys stigmaeus,,", ",M. Lance
Pv12.090,Platichthys stellatus,,", cf E sole",M. Lance
Pv12.090,Platichthys stellatus,,", cf E sole",M. Lance
Pv12.090,Platichthys stellatus,,", cf E sole",M. Lance
Pv12.091,Porichthys notatus,,", ",M. Lance
Pv12.091,Porichthys notatus,,", ",M. Lance
Pv12.091,Alosa sapidissima,,", ",M. Lance
Pv12.091,Galiteuthis spp.,,", ",M. Lance
Pv12.091,Citharichthys stigmaeus,,", ",M. Lance
Pv12.091,Citharichthys stigmaeus,,", ",M. Lance
Pv12.091,Citharichthys stigmaeus,,", ",M. Lance
Pv12.091,Merluccius productus,,", ",M. Lance
Pv12.092,Pleuronectes vetulus,,", ",M. Lance
Pv12.092,Pleuronectes vetulus,,", ",M. Lance
Pv12.092,Pleuronectes vetulus,,", ",M. Lance
Pv12.092,Pholid spp.,,", ",M. Lance
Pv12.092,Pholid spp.,,", ",M. Lance
Pv12.092,Pholid spp.,,", ",M. Lance
Pv12.092,Lampetra tridentata,,", ",M. Lance
Pv12.093,Oncorhynchus tshawytscha,Juvenile,", juv",M. Lance
Pv12.093,Gadid or Merluccid,,", ",M. Lance
Pv12.093,Clupeid spp.,,", ",M. Lance
Pv12.094,Merluccius productus,,", ",M. Lance
Pv12.094,Merluccius productus,,", ",M. Lance
Pv12.094,Merluccius productus,,", ",M. Lance
Pv12.094,Citharichthys stigmaeus,,", ",M. Lance
Pv12.094,Citharichthys stigmaeus,,", ",M. Lance
Pv12.096,Citharichthys stigmaeus,,", ",M. Lance
Pv12.096,Citharichthys stigmaeus,,", ",M. Lance
Pv12.096,Citharichthys stigmaeus,,", ",M. Lance
Pv12.096,Citharichthys stigmaeus,,", ",M. Lance
Pv12.098,Stichaeid spp.,,", ",M. Lance
Pv12.098,Stichaeid spp.,,", ",M. Lance
Pv12.099,Clupeid spp.,,", ",M. Lance
Pv12.099,Merluccius productus,,", ",M. Lance
Pv12.099,Merluccius productus,,", ",M. Lance
Pv12.099,Merluccius productus,,", ",M. Lance
Pv12.099,Merluccius productus,,", ",M. Lance
Pv12.100,Merluccius productus,,", ",M. Lance
Pv12.100,Merluccius productus,,", ",M. Lance
Pv12.100,Merluccius productus,,", ",M. Lance
Pv12.101,Galiteuthis spp.,,", ",M. Lance
Pv12.101,Merluccius productus,,", ",M. Lance
Pv12.101,Merluccius productus,,", ",M. Lance
Pv12.101,Merluccius productus,,", ",M. Lance
Pv12.101,Citharichthys stigmaeus,,", ",M. Lance
Pv12.101,Citharichthys stigmaeus,,", ",M. Lance
Pv12.101,Citharichthys stigmaeus,,", ",M. Lance
Pv12.102,Citharichthys stigmaeus,,", ",M. Lance
Pv12.102,Citharichthys stigmaeus,,", ",M. Lance
Pv12.102,Citharichthys stigmaeus,,", ",M. Lance
Pv12.103,Bathylagid spp.,,", ",M. Lance
Pv12.103,Bathylagid spp.,,", ",M. Lance
Pv12.103,Bathylagid spp.,,", ",M. Lance
Pv12.103,Citharichthys stigmaeus,,", ",M. Lance
Pv12.103,Citharichthys stigmaeus,,", ",M. Lance
Pv12.103,Citharichthys stigmaeus,,", ",M. Lance
Pv12.103,Citharichthys stigmaeus,,", ",M. Lance
Pv12.104,Clupeid spp.,,", ",M. Lance
Pv12.105,Thaleichthys pacificus,,", ",M. Lance
Pv12.105,Thaleichthys pacificus,,", ",M. Lance
Pv12.105,Thaleichthys pacificus,,", ",M. Lance
Pv12.105,Citharichthys stigmaeus,,", ",M. Lance
Pv12.105,Citharichthys stigmaeus,,", ",M. Lance
Pv12.106,Diaphus theta,,", ",M. Lance
Pv12.106,Merluccius productus,,", ",M. Lance
Pv12.106,Merluccius productus,,", ",M. Lance
Pv12.106,Citharichthys stigmaeus,,", ",M. Lance
Pv12.106,Citharichthys stigmaeus,,", ",M. Lance
Pv12.107,Diaphus theta,,", ",M. Lance
Pv12.107,Diaphus theta,,", ",M. Lance
Pv12.107,Diaphus theta,,", ",M. Lance
Pv12.107,Citharichthys stigmaeus,,", ",M. Lance
Pv12.107,Citharichthys stigmaeus,,", ",M. Lance
Pv12.107,Citharichthys stigmaeus,,", ",M. Lance
Pv12.108,Myxinid species,,", ",M. Lance
Pv12.109,Porichthys notatus,,", ",M. Lance
Pv12.110,Citharichthys stigmaeus,,", ",M. Lance
Pv12.110,Citharichthys stigmaeus,,", ",M. Lance
Pv12.110,Citharichthys stigmaeus,,", ",M. Lance
Pv12.111,Pholid spp.,,", ",M. Lance
Pv12.111,Pholid spp.,,", ",M. Lance
Pv12.111,Pholid spp.,,", ",M. Lance
Pv12.111,Platichthys stellatus,,", ",M. Lance
Pv12.111,Platichthys stellatus,,", ",M. Lance
Pv12.111,Platichthys stellatus,,", ",M. Lance
Pv12.111,Lampetra tridentata,,", ",M. Lance
Pv12.112,Stichaeid spp.,,", ",M. Lance
Pv12.112,Stichaeid spp.,,", ",M. Lance
Pv12.112,Clupeid spp.,,", ",M. Lance
Pv12.113,Gonatus spp.,,", ",M. Lance
Pv12.113,Gonatus spp.,,", ",M. Lance
Pv12.113,Citharichthys stigmaeus,,", ",M. Lance
Pv12.113,Citharichthys stigmaeus,,", ",M. Lance
Pv12.113,Citharichthys stigmaeus,,", ",M. Lance
Pv12.114,Gadid or Merluccid,,", ",M. Lance
Pv12.115,Diaphus theta,,", ",M. Lance
Pv12.115,Oncorhynchus tshawytscha,Juvenile,", juv",M. Lance
Pv12.115,Clupeid spp.,,", ",M. Lance
Pv12.115,Gadid or Merluccid,,", ",M. Lance
Pv12.116,Citharichthys stigmaeus,,", ",M. Lance
Pv12.116,Citharichthys stigmaeus,,", ",M. Lance
Pv12.116,Citharichthys stigmaeus,,", ",M. Lance
Pv12.116,Citharichthys stigmaeus,,", ",M. Lance
Pv12.116,Alosa sapidissima,,", ",M. Lance
Pv12.117,Thaleichthys pacificus,,", ",M. Lance
Pv12.117,Thaleichthys pacificus,,", ",M. Lance
Pv12.117,Thaleichthys pacificus,,", ",M. Lance
Pv12.117,Sardinops sagax,,", ",M. Lance
Pv12.119,Diaphus theta,,", ",M. Lance
Pv12.119,Citharichthys stigmaeus,,", ",M. Lance
Pv12.119,Citharichthys stigmaeus,,", ",M. Lance
Pv12.119,Citharichthys stigmaeus,,", ",M. Lance
Pv12.120,Bathylagid spp.,,", ",M. Lance
Pv12.120,Citharichthys stigmaeus,,", ",M. Lance
Pv12.120,Citharichthys stigmaeus,,", ",M. Lance
Pv12.120,Citharichthys stigmaeus,,", ",M. Lance
Pv12.120,Gadid or Merluccid,,", ",M. Lance
Pv12.121,Bathylagid spp.,,", ",M. Lance
Pv12.121,Gonatus spp.,,", ",M. Lance
Pv12.121,Gonatus spp.,,", ",M. Lance
Pv12.121,Gadid or Merluccid,,", ",M. Lance
Pv12.121,Citharichthys stigmaeus,,", ",M. Lance
Pv12.121,Citharichthys stigmaeus,,", ",M. Lance
Pv12.121,Citharichthys stigmaeus,,", ",M. Lance
Pv12.122,Gonatus spp.,,", ",M. Lance
Pv12.122,Gonatus spp.,,", ",M. Lance
Pv12.122,Gonatus spp.,,", ",M. Lance
Pv12.122,Gadid or Merluccid,,", ",M. Lance
Pv12.122,Clupeid spp.,,", ",M. Lance
Pv12.123,Gonatus spp.,,", ",M. Lance
Pv12.123,Diaphus theta,,", ",M. Lance
Pv12.123,Diaphus theta,,", ",M. Lance
Pv12.123,Diaphus theta,,", ",M. Lance
Pv12.123,Citharichthys stigmaeus,,", ",M. Lance
Pv12.123,Oncorhynchus tshawytscha,Juvenile,", juv",M. Lance
Pv12.124,Clupeid spp.,,", ",M. Lance
Pv12.125,Citharichthys stigmaeus,,", ",M. Lance
Pv12.125,Galiteuthis spp.,,", ",M. Lance
Pv12.126,Bathylagid spp.,,", ",M. Lance
Pv12.126,Bathylagid spp.,,", ",M. Lance
Pv12.126,Gonatus spp.,,", ",M. Lance
Pv12.126,Gonatus spp.,,", ",M. Lance
Pv12.126,Gonatus spp.,,", ",M. Lance
Pv12.126,Merluccius productus,,", ",M. Lance
Pv12.126,Merluccius productus,,", ",M. Lance
Pv12.126,Merluccius productus,,", ",M. Lance
Pv12.126,Citharichthys stigmaeus,,", ",M. Lance
Pv12.126,Citharichthys stigmaeus,,", ",M. Lance
Pv12.126,Citharichthys stigmaeus,,", ",M. Lance
Pv12.127,Gonatus spp.,,", ",M. Lance
Pv12.127,Citharichthys stigmaeus,,", ",M. Lance
Pv12.127,Citharichthys stigmaeus,,", ",M. Lance
Pv12.129,Myxinid species,,", ",M. Lance
Pv12.130,Clupeid spp.,,", ",M. Lance
Pv12.130,Sardinops sagax,,", ",M. Lance
Pv12.130,Oncorhynchus spp.,Adult,", ad",M. Lance
Pv12.131,Stichaeid spp.,,", ",M. Lance
Pv12.131,Stichaeid spp.,,", ",M. Lance
Pv12.132,Citharichthys stigmaeus,,", ",M. Lance
Pv12.132,Ommasteuthid spp.,,", juv",M. Lance
Pv12.132,Ommasteuthid spp.,,", juv",M. Lance
Pv12.132,Ommasteuthid spp.,,", juv",M. Lance
Pv12.132,Oncorhynchus tshawytscha,Juvenile,", juv",M. Lance
Pv12.132,Oncorhynchus tshawytscha,Juvenile,", juv",M. Lance
Pv12.133,Rhaochilus vacca,,", ",M. Lance
Pv12.133,Thaleichthys pacificus,,", ",M. Lance
Pv12.133,Thaleichthys pacificus,,", ",M. Lance
Pv12.133,Thaleichthys pacificus,,", ",M. Lance
Pv12.134,Unidentified flatfish,,", ",M. Lance
Pv12.135,Oncorhynchus tshawytscha,Juvenile,", juv",M. Lance
Pv12.135,Clupeid spp.,,", ",M. Lance
Pv12.136,Diaphus theta,,", ",M. Lance
Pv12.136,Diaphus theta,,", ",M. Lance
Pv12.136,Alosa sapidissima,,", ",M. Lance
Pv12.136,Alosa sapidissima,,", ",M. Lance
Pv12.137,Thaleichthys pacificus,,", ",M. Lance
Pv12.137,Thaleichthys pacificus,,", ",M. Lance
Pv12.137,Thaleichthys pacificus,,", ",M. Lance
Pv12.137,Unidentified flatfish,,", dried, brkn",M. Lance
Pv12.138,Citharichthys stigmaeus,,", ",M. Lance
Pv12.139,Merluccius productus,,", ",M. Lance
Pv12.140,Clupeid spp.,,", ",M. Lance
Pv12.141,Clupeid spp.,,", ",M. Lance
Pv12.141,Stichaeid spp.,,", ",M. Lance
Pv12.141,Stichaeid spp.,,", ",M. Lance
Pv12.142,Diaphus theta,,", ",M. Lance
Pv12.142,Cyclopterid spp.,,", ",M. Lance
Pv12.142,Cyclopterid spp.,,", ",M. Lance
Pv12.142,Cyclopterid spp.,,", ",M. Lance
Pv12.142,Stichaeid spp.,,", ",M. Lance
Pv12.142,Stichaeid spp.,,", ",M. Lance
Pv12.142,Stichaeid spp.,,", ",M. Lance
Pv12.143,Diaphus theta,,", ",M. Lance
Pv12.143,Diaphus theta,,", ",M. Lance
Pv12.143,Diaphus theta,,", ",M. Lance
Pv12.144,Pholid spp.,,", ",M. Lance
Pv12.145,Clupeid spp.,,", ",M. Lance
Pv12.146,Zoarcid spp.,,", ",M. Lance
Pv12.146,Zoarcid spp.,,", ",M. Lance
Pv12.146,Zoarcid spp.,,", ",M. Lance
Pv12.146,Cyclopterid spp.,,", ",M. Lance
Pv12.146,Cyclopterid spp.,,", ",M. Lance
Pv12.146,Clupeid spp.,,", ",M. Lance
Pv12.147,Oncorhynchus spp.,Adult,", ad",M. Lance
Pv12.147,Clupeid spp.,,", ",M. Lance
Pv12.148,Myxinid species,,", ",M. Lance
Pv12.149,Merluccius productus,,", ",M. Lance
Pv12.150,Bathylagid spp.,,", ",M. Lance
Pv12.150,Bathylagid spp.,,", ",M. Lance
Pv12.150,Bathylagid spp.,,", ",M. Lance
Pv12.150,Merluccius productus,,", ",M. Lance
Pv12.150,Merluccius productus,,", ",M. Lance
Pv12.150,Merluccius productus,,", ",M. Lance
Pv12.151,Myxinid species,,", ",M. Lance
Pv12.152,Clupeid spp.,,", ",M. Lance
Pv12.153,Myxinid species,,", ",M. Lance
Pv12.153,Unidentified flatfish,,", ",M. Lance
Pv12.154,Oncorhynchus tshawytscha,Juvenile,", juv",M. Lance
Pv12.154,Oncorhynchus tshawytscha,Juvenile,", juv",M. Lance
Pv12.154,Oncorhynchus tshawytscha,Juvenile,", juv",M. Lance
Pv12.154,Citharichthys stigmaeus,,", ",M. Lance
Pv12.155,Citharichthys stigmaeus,,", ",M. Lance
Pv12.156,Oncorhynchus tshawytscha,Juvenile,", juv",M. Lance
Pv12.156,Oncorhynchus tshawytscha,Juvenile,", juv",M. Lance
Pv12.156,Gadid or Merluccid,,", ",M. Lance
Pv12.156,Citharichthys stigmaeus,,", ",M. Lance
Pv12.156,Citharichthys stigmaeus,,", ",M. Lance
Pv12.156,Citharichthys stigmaeus,,", ",M. Lance
Pv12.157,Stichaeid spp.,,", ",M. Lance
Pv12.157,Diaphus theta,,", ",M. Lance
Pv12.157,Diaphus theta,,", ",M. Lance
Pv12.157,Oncorhynchus tshawytscha,Juvenile,", juv",M. Lance
Pv12.158,Citharichthys stigmaeus,,", ",M. Lance
Pv12.158,Citharichthys stigmaeus,,", ",M. Lance
Pv12.158,Merluccius productus,,", ",M. Lance
Pv12.158,Merluccius productus,,", ",M. Lance
Pv12.159,Merluccius productus,,", ",M. Lance
Pv12.159,Merluccius productus,,", ",M. Lance
Pv12.159,Merluccius productus,,", ",M. Lance
Pv12.159,Citharichthys stigmaeus,,", ",M. Lance
Pv12.159,Citharichthys stigmaeus,,", ",M. Lance
Pv12.159,Oncorhynchus spp.,Adult,", ad",M. Lance
Pv12.160,Oncorhynchus spp.,Adult,", ad",M. Lance
Pv12.161,Merluccius productus,,", ",M. Lance
Pv12.161,Merluccius productus,,", ",M. Lance
Pv12.161,Merluccius productus,,", ",M. Lance
Pv12.162,Oncorhynchus tshawytscha,Juvenile,", juv",M. Lance
Pv12.162,Oncorhynchus tshawytscha,Juvenile,", juv",M. Lance
Pv12.162,Oncorhynchus tshawytscha,Juvenile,", juv",M. Lance
Pv12.163,Thaleichthys pacificus,,", ",M. Lance
Pv12.164,Pleuronectes vetulus,,", ",M. Lance
Pv12.164,Pleuronectes vetulus,,", ",M. Lance
Pv12.164,Pleuronectes vetulus,,", ",M. Lance
Pv12.165,Diaphus theta,,", ",M. Lance
Pv12.165,Diaphus theta,,", ",M. Lance
Pv12.165,Ommasteuthid spp.,,", juv",M. Lance
Pv12.165,Ommasteuthid spp.,,", juv",M. Lance
Pv12.165,Ommasteuthid spp.,,", juv",M. Lance
Pv12.165,Ommasteuthid spp.,,", juv",M. Lance
Pv12.165,Oncorhynchus tshawytscha,Juvenile,", juv",M. Lance
Pv12.165,Ommasteuthid spp.,,", juv",M. Lance
Pv12.165,Ommasteuthid spp.,,", juv",M. Lance
Pv12.165,Alosa sapidissima,,", ",M. Lance
Pv12.165,Citharichthys stigmaeus,,", ",M. Lance
Pv12.165,Citharichthys stigmaeus,,", ",M. Lance
Pv12.165,Citharichthys stigmaeus,,", ",M. Lance
Pv12.165,Merluccius productus,,", ",M. Lance
Pv12.165,Merluccius productus,,", ",M. Lance
Pv12.165,Merluccius productus,,", ",M. Lance
Pv12.165,Thaleichthys pacificus,,", ",M. Lance
Pv12.165,Thaleichthys pacificus,,", ",M. Lance
Pv12.165,Thaleichthys pacificus,,", ",M. Lance
Pv12.165,Galiteuthis spp.,,", ",M. Lance
Pv12.167,Citharichthys stigmaeus,,", ",M. Lance
Pv12.169,Galiteuthis spp.,,", ",M. Lance
Pv12.170,Oncorhynchus tshawytscha,Juvenile,", juv",M. Lance
Pv12.170,Oncorhynchus tshawytscha,Juvenile,", juv",M. Lance
Pv12.170,Citharichthys stigmaeus,,", ",M. Lance
Pv12.170,Citharichthys stigmaeus,,", ",M. Lance
Pv12.171,Citharichthys stigmaeus,,", ",M. Lance
Pv12.171,Citharichthys stigmaeus,,", ",M. Lance
Pv12.171,Citharichthys stigmaeus,,", ",M. Lance
Pv12.172,Cyclopterid spp.,,", lg",M. Lance
Pv12.172,Cyclopterid spp.,,", sm",M. Lance
Pv12.172,Cyclopterid spp.,,", ",M. Lance
Pv12.172,Coloabis saira,,", ",M. Lance
Pv12.173,Cyclopterid spp.,,", ",M. Lance
Pv12.173,Cyclopterid spp.,,", ",M. Lance
Pv12.173,Citharichthys stigmaeus,,", ",M. Lance
Pv12.173,Citharichthys stigmaeus,,", ",M. Lance
Pv12.173,Citharichthys stigmaeus,,", ",M. Lance
Pv12.173,Stichaeid spp.,,", ",M. Lance
Pv12.173,Stichaeid spp.,,", ",M. Lance
Pv12.173,Stichaeid spp.,,", ",M. Lance
Pv12.174,Myxinid species,,", v eroded",M. Lance
Pv12.175,Thaleichthys pacificus,,", ",M. Lance
Pv12.175,Thaleichthys pacificus,,", ",M. Lance
Pv12.175,Thaleichthys pacificus,,", ",M. Lance
Pv12.175,Clupeid spp.,,", ",M. Lance
Pv12.176,Merluccius productus,,", ",M. Lance
Pv12.176,Merluccius productus,,", ",M. Lance
Pv12.176,Citharichthys stigmaeus,,", ",M. Lance
Pv12.176,Citharichthys stigmaeus,,", ",M. Lance
Pv12.176,Oncorhynchus tshawytscha,Juvenile,", juv",M. Lance
Pv12.177,Cyclopterid spp.,,", ",M. Lance
Pv12.177,Cyclopterid spp.,,", ",M. Lance
Pv12.177,Cyclopterid spp.,,", ",M. Lance
Pv12.177,Lampetra tridentata,,", ",M. Lance
Pv12.177,Lampetra tridentata,,", ",M. Lance
Pv12.177,Lampetra tridentata,,", ",M. Lance
Pv12.177,Coloabis saira,,", ",M. Lance
Pv12.177,Pholid spp.,,", ",M. Lance
Pv12.177,Pholid spp.,,", ",M. Lance
Pv12.178,Citharichthys stigmaeus,,", ",M. Lance
Pv12.178,Citharichthys stigmaeus,,", ",M. Lance
Pv12.178,Citharichthys stigmaeus,,", ",M. Lance
Pv12.179,Bathylagid spp.,,", ",M. Lance
Pv12.179,Citharichthys stigmaeus,,", ",M. Lance
Pv12.179,Ommasteuthid spp.,,", juv",M. Lance
Pv12.179,Ommasteuthid spp.,,", juv",M. Lance
Pv12.179,Ommasteuthid spp.,,", juv",M. Lance
Pv12.179,Ommasteuthid spp.,,", juv",M. Lance
Pv12.180,Gonatus spp.,,", ",M. Lance
Pv12.180,Gonatus spp.,,", ",M. Lance
Pv12.180,Lampetra tridentata,,", ",M. Lance
Pv12.180,Lampetra tridentata,,", ",M. Lance
Pv12.180,Lampetra tridentata,,", ",M. Lance
Pv12.180,Cyclopterid spp.,,", ",M. Lance
Pv12.180,Cyclopterid spp.,,", ",M. Lance
Pv12.180,Galiteuthis spp.,,", ",M. Lance
Pv12.180,Merluccius productus,,", ",M. Lance
Pv12.180,Merluccius productus,,", ",M. Lance
Pv12.180,Citharichthys stigmaeus,,", ",M. Lance
Pv12.180,Citharichthys stigmaeus,,", ",M. Lance
Pv12.180,Citharichthys stigmaeus,,", ",M. Lance
Pv12.181,Gonatus spp.,,", ",M. Lance
Pv12.181,Gonatus spp.,,", ",M. Lance
Pv12.181,Gonatus spp.,,", ",M. Lance
Pv12.181,Coloabis saira,,", ",M. Lance
Pv12.181,Alosa sapidissima,,", ",M. Lance
Pv12.181,Thaleichthys pacificus,,", ",M. Lance
Pv12.181,Citharichthys stigmaeus,,", ",M. Lance
Pv12.181,Citharichthys stigmaeus,,", ",M. Lance
Pv12.181,Citharichthys stigmaeus,,", ",M. Lance
Pv12.182,Thaleichthys pacificus,,", ",M. Lance
Pv12.182,Clupeid spp.,,", ",M. Lance
Pv12.183,Citharichthys stigmaeus,,", ",M. Lance
Pv12.183,Citharichthys stigmaeus,,", ",M. Lance
Pv12.183,Citharichthys stigmaeus,,", ",M. Lance
Pv12.183,Oncorhynchus tshawytscha,Juvenile,", juv",M. Lance
Pv12.183,Oncorhynchus tshawytscha,Juvenile,", juv",M. Lance
Pv12.183,Oncorhynchus tshawytscha,Juvenile,", juv",M. Lance
Pv12.184,Bathylagid spp.,,", ",M. Lance
Pv12.184,Bathylagid spp.,,", ",M. Lance
Pv12.184,Merluccius productus,,", ",M. Lance
Pv12.184,Merluccius productus,,", ",M. Lance
Pv12.184,Merluccius productus,,", ",M. Lance
Pv12.184,Clupeid spp.,,", ",M. Lance
Pv12.185,Gonatus spp.,,", ",M. Lance
Pv12.185,Gonatus spp.,,", ",M. Lance
Pv12.185,Citharichthys stigmaeus,,", ",M. Lance
Pv12.185,Citharichthys stigmaeus,,", ",M. Lance
Pv12.186,Bathylagid spp.,,", ",M. Lance
Pv12.186,Bathylagid spp.,,", ",M. Lance
Pv12.186,Bathylagid spp.,,", ",M. Lance
Pv12.186,Labrid spp.,,", ",M. Lance
Pv12.186,Merluccius productus,,", ",M. Lance
Pv12.186,Oncorhynchus tshawytscha,Juvenile,", juv",M. Lance
Pv12.186,Oncorhynchus tshawytscha,Juvenile,", juv",M. Lance
Pv12.186,Citharichthys stigmaeus,,", ",M. Lance
Pv12.186,Citharichthys stigmaeus,,", ",M. Lance
Pv12.186,Citharichthys stigmaeus,,", ",M. Lance
Pv12.187,Bathylagid spp.,,", ",M. Lance
Pv12.187,Bathylagid spp.,,", ",M. Lance
Pv12.187,Bathylagid spp.,,", ",M. Lance
Pv12.187,Labrid spp.,,", ",M. Lance
Pv12.187,Merluccius productus,,", ",M. Lance
Pv12.187,Merluccius productus,,", ",M. Lance
Pv12.187,Merluccius productus,,", ",M. Lance
Pv12.187,Oncorhynchus tshawytscha,Juvenile,", juv",M. Lance
Pv12.187,Oncorhynchus tshawytscha,Juvenile,", juv",M. Lance
Pv12.187,Oncorhynchus tshawytscha,Juvenile,", juv",M. Lance
Pv12.187,Citharichthys stigmaeus,,", ",M. Lance
Pv12.187,Citharichthys stigmaeus,,", ",M. Lance
Pv12.187,Citharichthys stigmaeus,,", ",M. Lance
Pv12.188,Myxinid species,,", ",M. Lance
Pv12.189,Clupeid spp.,,", ",M. Lance
Pv12.189,Oncorhynchus spp.,Adult,", ad",M. Lance
Pv12.190,Oncorhynchus spp.,Adult,", ad",M. Lance
Pv12.191,Labrid spp.,,", ",M. Lance
Pv12.191,Oncorhynchus spp.,Adult,", ad",M. Lance
Pv12.192,Gadid or Merluccid,,", cf pollock",M. Lance
Pv12.193,Oncorhynchus spp.,Adult,", ad",M. Lance
Pv12.194,Myxinid species,,", ",M. Lance
Pv12.195,Oncorhynchus spp.,Adult,", ad",M. Lance
Pv12.195,Labrid spp.,,", ",M. Lance
Pv12.195,Clupeid spp.,,", ",M. Lance
Pv12.195,Coloabis saira,,", ",M. Lance
Pv12.195,Coloabis saira,,", ",M. Lance
Pv12.196,Clupeid spp.,,", ",M. Lance
Pv12.197,Oncorhynchus spp.,Adult,", ad",M. Lance
Pv12.198,Oncorhynchus spp.,Adult,", ad",M. Lance
Pv12.198,Clupeid spp.,,", ",M. Lance
Pv12.198,Lampetra tridentata,,", ",M. Lance
Pv12.199,Oncorhynchus spp.,Adult,", ad",M. Lance
Pv12.199,Oncorhynchus spp.,Adult,", ad",M. Lance
Pv12.199,Citharichthys stigmaeus,,", ",M. Lance
Pv12.199,Citharichthys stigmaeus,,", ",M. Lance
Pv12.199,Thaleichthys pacificus,,", ",M. Lance
Pv12.199,Thaleichthys pacificus,,", ",M. Lance
Pv12.200,Oncorhynchus spp.,Adult,", ad",M. Lance
Pv12.201,Oncorhynchus spp.,Adult,", ad",M. Lance
Pv12.202,Oncorhynchus spp.,Adult,", ad",M. Lance
Pv12.204,Oncorhynchus spp.,Adult,", ad",M. Lance
Pv12.205,Gadid or Merluccid,,", ",M. Lance
Pv12.205,Labrid spp.,,", ",M. Lance
Pv12.205,Oncorhynchus spp.,Adult,", ad",M. Lance
Pv12.205,Coloabis saira,,", ",M. Lance
Pv12.205,Coloabis saira,,", ",M. Lance
Pv12.205,Coloabis saira,,", ",M. Lance
Pv12.206,Oncorhynchus spp.,Adult,", ad",M. Lance
Pv12.207,Myxinid species,,", ",M. Lance
Pv12.208,Citharichthys stigmaeus,,", ",M. Lance
Pv12.208,Citharichthys stigmaeus,,", ",M. Lance
Pv12.208,Osmerid spp.,,", ",M. Lance
Pv12.208,Osmerid spp.,,", ",M. Lance
Pv12.209,Oncorhynchus spp.,Adult,", ad",M. Lance
Pv12.210,Clupeid spp.,,", ",M. Lance
Pv12.210,Oncorhynchus spp.,Adult,", ad",M. Lance
Pv12.211,Oncorhynchus spp.,Adult,", ad",M. Lance
Pv12.212,Oncorhynchus spp.,Adult,", ad",M. Lance
Pv12.213,Oncorhynchus spp.,Adult,", ad",M. Lance
Pv12.214,Clupeid spp.,,", ",M. Lance
Pv12.215,Oncorhynchus spp.,Adult,", ad",M. Lance
Pv12.216,Clupeid spp.,,", ",M. Lance
Pv12.216,Labrid spp.,,", ",M. Lance
Pv12.216,Oncorhynchus spp.,Adult,", ad",M. Lance
Pv12.217,Oncorhynchus spp.,Adult,", ad",M. Lance
Pv12.218,Citharichthys stigmaeus,,", ",M. Lance
Pv12.218,Citharichthys stigmaeus,,", ",M. Lance
Pv12.218,Oncorhynchus spp.,Adult,", ad",M. Lance
Pv12.219,Oncorhynchus spp.,Adult,", ad",M. Lance
Pv12.220,Citharichthys stigmaeus,,", ",M. Lance
Pv12.220,Citharichthys stigmaeus,,", ",M. Lance
Pv12.220,Citharichthys stigmaeus,,", ",M. Lance
Pv12.221,Oncorhynchus spp.,Adult,", ad",M. Lance
Pv12.221,Citharichthys stigmaeus,,", ",M. Lance
Pv12.221,Citharichthys stigmaeus,,", ",M. Lance
Pv12.221,Citharichthys stigmaeus,,", ",M. Lance
Pv12.222,Citharichthys stigmaeus,,", ",M. Lance
Pv12.222,Citharichthys stigmaeus,,", ",M. Lance
Pv12.222,Citharichthys stigmaeus,,", ",M. Lance
Pv12.223,Oncorhynchus spp.,Adult,", ad",M. Lance
Pv12.223,Citharichthys stigmaeus,,", ",M. Lance
Pv12.223,Citharichthys stigmaeus,,", ",M. Lance
Pv12.224,Oncorhynchus tshawytscha,Juvenile,", juv",M. Lance
Pv12.224,Clupeid spp.,,", ",M. Lance
Pv12.225,Ommasteuthid spp.,,", ad or juv? Didn't measure",M. Lance
Pv12.225,Ommasteuthid spp.,,", bone is AD, assume ONCNER?",M. Lance
Pv12.225,Citharichthys stigmaeus,,", ",M. Lance
Pv12.225,Citharichthys stigmaeus,,", ",M. Lance
Pv12.225,Citharichthys stigmaeus,,", ",M. Lance
Pv12.225,Labrid spp.,,", ",M. Lance
Pv12.226,Oncorhynchus spp.,Adult,", ad",M. Lance
Pv12.227,Citharichthys stigmaeus,,", ",M. Lance
Pv12.227,Citharichthys stigmaeus,,", ",M. Lance
Pv12.227,Citharichthys stigmaeus,,", ",M. Lance
Pv12.227,Citharichthys stigmaeus,,", ",M. Lance
Pv12.293,Bathylagid spp.,,", ",M. Lance
Pv12.293,Bathylagid spp.,,", ",M. Lance
Pv12.293,Bathylagid spp.,,", ",M. Lance
Pv12.293,Labrid spp.,,", ",M. Lance
Pv12.293,Citharichthys stigmaeus,,", ",M. Lance
Pv12.293,Citharichthys stigmaeus,,", ",M. Lance
Pv12.293,Merluccius productus,,", ",M. Lance
Pv12.293,Merluccius productus,,", ",M. Lance
Pv12.293,Merluccius productus,,", ",M. Lance
Pv12.293,Galiteuthis spp.,,", ",M. Lance
Pv12.294,Citharichthys stigmaeus,,", ",M. Lance
Pv12.294,Citharichthys stigmaeus,,", ",M. Lance
Pv12.294,Citharichthys stigmaeus,,", ",M. Lance
Pv12.294,Thaleichthys pacificus,,", ",M. Lance
Pv12.294,Thaleichthys pacificus,,", ",M. Lance
Pv12.295,Bathylagid spp.,,", ",M. Lance
Pv12.295,Bathylagid spp.,,", ",M. Lance
Pv12.295,Citharichthys stigmaeus,,", ",M. Lance
Pv12.295,Citharichthys stigmaeus,,", ",M. Lance
Pv12.295,Citharichthys stigmaeus,,", ",M. Lance
Pv12.296,Citharichthys stigmaeus,,", ",M. Lance
Pv12.296,Citharichthys stigmaeus,,", ",M. Lance
Pv12.296,Thaleichthys pacificus,,", ",M. Lance
Pv12.296,Thaleichthys pacificus,,", ",M. Lance
Pv12.296,Thaleichthys pacificus,,", ",M. Lance
Pv12.297,Cyclopterid spp.,,", ",M. Lance
Pv12.297,Cyclopterid spp.,,", ",M. Lance
Pv12.297,Cyclopterid spp.,,", ",M. Lance
Pv12.297,Thaleichthys pacificus,,", ",M. Lance
Pv12.297,Thaleichthys pacificus,,", ",M. Lance
Pv12.297,Thaleichthys pacificus,,", ",M. Lance
Pv12.297,Citharichthys stigmaeus,,", ",M. Lance
Pv12.297,Citharichthys stigmaeus,,", ",M. Lance
Pv12.297,Stichaeid spp.,,", ",M. Lance
Pv12.297,Stichaeid spp.,,", ",M. Lance
Pv12.297,Stichaeid spp.,,", ",M. Lance
Pv12.297,Stichaeid spp.,,", ",M. Lance
Pv12.298,Thaleichthys pacificus,,", ",M. Lance
Pv12.298,Thaleichthys pacificus,,", ",M. Lance
Pv12.298,Thaleichthys pacificus,,", ",M. Lance
Pv12.298,Citharichthys stigmaeus,,", ",M. Lance
Pv12.298,Citharichthys stigmaeus,,", ",M. Lance
Pv12.298,Citharichthys stigmaeus,,", ",M. Lance
Pv12.299,Pleuronectes vetulus,,", ",M. Lance
Pv12.299,Pleuronectes vetulus,,", ",M. Lance
Pv12.301,Thaleichthys pacificus,,", ",M. Lance
Pv12.301,Thaleichthys pacificus,,", ",M. Lance
Pv12.301,Citharichthys stigmaeus,,", ",M. Lance
Pv12.301,Citharichthys stigmaeus,,", ",M. Lance
Pv12.301,Citharichthys stigmaeus,,", ",M. Lance
Pv12.303,Oncorhynchus spp.,Adult,", ad",M. Lance
Pv12.305,Citharichthys stigmaeus,,", ",M. Lance
Pv12.306,Clupeid spp.,,", ",M. Lance
Pv12.307,Thaleichthys pacificus,,", ",M. Lance
Pv12.310,Oncorhynchus tshawytscha,Juvenile,", juv?",M. Lance
Pv12.310,Citharichthys stigmaeus,,", ",M. Lance
Pv12.310,Citharichthys stigmaeus,,", ",M. Lance
Pv12.310,Merluccius productus,,", ",M. Lance
Pv12.310,Merluccius productus,,", ",M. Lance
Pv12.310,Citharichthys stigmaeus,,", ",M. Lance
Pv12.312,Gadid or Merluccid,,", ",M. Lance
Pv12.312,Citharichthys stigmaeus,,", ",M. Lance
Pv12.313,Labrid spp.,,", ",M. Lance
Pv12.313,Bathylagid spp.,,", ",M. Lance
Pv12.313,Bathylagid spp.,,", ",M. Lance
Pv12.313,Bathylagid spp.,,", ",M. Lance
Pv12.313,Citharichthys stigmaeus,,", ",M. Lance
Pv12.313,Citharichthys stigmaeus,,", ",M. Lance
Pv12.313,Citharichthys stigmaeus,,", ",M. Lance
Pv12.314,Merluccius productus,,", ",M. Lance
Pv12.314,Merluccius productus,,", ",M. Lance
Pv12.314,Merluccius productus,,", ",M. Lance
Pv12.314,Thaleichthys pacificus,,", ",M. Lance
Pv12.314,Thaleichthys pacificus,,", ",M. Lance
Pv12.314,Citharichthys stigmaeus,,", ",M. Lance
Pv12.314,Citharichthys stigmaeus,,", ",M. Lance
Pv12.314,Citharichthys stigmaeus,,", ",M. Lance
Pv12.314,Labrid spp.,,", ",M. Lance
Pv12.315,Unidentified flatfish,,", ",M. Lance
Pv12.315,Clupeid spp.,,", ",M. Lance
Pv12.315,Zoarcid spp.,,", ",M. Lance
Pv12.315,Zoarcid spp.,,", ",M. Lance
Pv12.315,Labrid spp.,,", ",M. Lance
Pv12.315,Thaleichthys pacificus,,", ",M. Lance
Pv12.315,Thaleichthys pacificus,,", ",M. Lance
Pv12.315,Thaleichthys pacificus,,", ",M. Lance
Pv12.317,Citharichthys stigmaeus,,", ",M. Lance
Pv12.317,Citharichthys stigmaeus,,", ",M. Lance
Pv12.317,Citharichthys stigmaeus,,", ",M. Lance
Pv12.317,Alosa sapidissima,,", ",M. Lance
Pv12.317,Oncorhynchus tshawytscha,Juvenile,", juv",M. Lance
Pv12.317,Oncorhynchus tshawytscha,Juvenile,", juv",M. Lance
Pv12.317,Oncorhynchus tshawytscha,Juvenile,", juv",M. Lance
Pv12.317,Ommasteuthid spp.,,", juv",M. Lance
Pv12.317,Oncorhynchus tshawytscha,Juvenile,", juv",M. Lance
Pv12.317,Embiotocid spp.,,", ",M. Lance
Pv12.317,Atheresthes stomias,,", ",M. Lance
Pv12.318,Thaleichthys pacificus,,", ",M. Lance
Pv12.318,Thaleichthys pacificus,,", ",M. Lance
Pv12.318,Thaleichthys pacificus,,", ",M. Lance
Pv12.318,Clupeid spp.,,", ",M. Lance
Pv12.319,Citharichthys stigmaeus,,", ",M. Lance
Pv12.319,Citharichthys stigmaeus,,", ",M. Lance
Pv12.319,Citharichthys stigmaeus,,", ",M. Lance
Pv12.320,Citharichthys stigmaeus,,", ",M. Lance
Pv12.321,Porichthys notatus,,", ",M. Lance
Pv12.321,Porichthys notatus,,", ",M. Lance
Pv12.321,Porichthys notatus,,", ",M. Lance
Pv12.321,Pleuronectes vetulus,,", ",M. Lance
Pv12.321,Pleuronectes vetulus,,", ",M. Lance
Pv12.321,Pleuronectes vetulus,,", ",M. Lance
Pv12.321,Pholid spp.,,", ",M. Lance
Pv12.321,Pholid spp.,,", ",M. Lance
Pv12.321,Pholid spp.,,", ",M. Lance
Pv12.322,Merluccius productus,,", ",M. Lance
Pv12.323,Lampetra tridentata,,", ",M. Lance
Pv12.323,Platichthys stellatus,,", ",M. Lance
Pv12.323,Unidentified flatfish,,", ",M. Lance
Pv12.323,Unidentified flatfish,,", ",M. Lance
Pv12.324,Oncorhynchus tshawytscha,Juvenile,", juv",M. Lance
Pv12.324,Citharichthys stigmaeus,,", ",M. Lance
Pv12.324,Citharichthys stigmaeus,,", ",M. Lance
Pv12.324,Citharichthys stigmaeus,,", ",M. Lance
Pv12.325,Pholid spp.,,", ",M. Lance
Pv12.326,Alosa sapidissima,,", ",M. Lance
Pv12.326,Alosa sapidissima,,", ",M. Lance
Pv12.326,Alosa sapidissima,,", ",M. Lance
Pv12.327,Zoarcid spp.,,", ",M. Lance
Pv12.327,Zoarcid spp.,,", ",M. Lance
Pv12.327,Zoarcid spp.,,", ",M. Lance
Pv12.329,Alosa sapidissima,,", ",M. Lance
Pv12.329,Alosa sapidissima,,", ",M. Lance
Pv12.329,Alosa sapidissima,,", ",M. Lance
Pv12.330,Citharichthys stigmaeus,,", ",M. Lance
Pv12.330,Citharichthys stigmaeus,,", ",M. Lance
Pv12.330,Citharichthys stigmaeus,,", ",M. Lance
Pv12.331,Stichaeid spp.,,", ",M. Lance
Pv12.331,Stichaeid spp.,,", ",M. Lance
Pv12.331,Stichaeid spp.,,", ",M. Lance
Pv12.332,Merluccius productus,,", ",M. Lance
Pv12.332,Gadid or Merluccid,,", ",M. Lance
Pv12.332,Oncorhynchus spp.,Adult,", ad",M. Lance
Pv12.333,Merluccius productus,,", ",M. Lance
Pv12.334,Oncorhynchus spp.,Adult,", ad",M. Lance
Pv12.335,Citharichthys stigmaeus,,", ",M. Lance
Pv12.335,Citharichthys stigmaeus,,", ",M. Lance
Pv12.335,Thaleichthys pacificus,,", ",M. Lance
Pv12.335,Thaleichthys pacificus,,", ",M. Lance
Pv12.335,Thaleichthys pacificus,,", ",M. Lance
Pv12.335,Merluccius productus,,", ",M. Lance
Pv12.335,Merluccius productus,,", ",M. Lance
Pv12.335,Lampetra tridentata,,", ",M. Lance
Pv12.335,Lampetra tridentata,,", ",M. Lance
Pv12.335,Lampetra tridentata,,", ",M. Lance
Pv12.336,Merluccius productus,,", ",M. Lance
Pv12.337,Stichaeid spp.,,", ",M. Lance
Pv12.337,Stichaeid spp.,,", ",M. Lance
Pv12.337,Stichaeid spp.,,", ",M. Lance
Pv12.338,Oncorhynchus spp.,Adult,", ad",M. Lance
Pv12.339,Oncorhynchus spp.,Adult,", ad",M. Lance
Pv12.340,Oncorhynchus spp.,Adult,", cf ONCNER, juv/ad?",M. Lance
Pv12.340,Oncorhynchus spp.,Adult,", ad",M. Lance
Pv12.341,Thaleichthys pacificus,,", ",M. Lance
Pv12.341,Thaleichthys pacificus,,", ",M. Lance
Pv12.341,Thaleichthys pacificus,,", ",M. Lance
Pv12.342,Oncorhynchus spp.,Adult,", juv/ad?",M. Lance
Pv12.342,Oncorhynchus spp.,Adult,", ad",M. Lance
Pv12.343,Oncorhynchus spp.,Adult,", ad",M. Lance
Pv12.344,Unidentified flatfish,,", ",M. Lance
Pv12.344,Coloabis saira,,", ",M. Lance
Pv12.344,Coloabis saira,,", ",M. Lance
Pv12.344,Coloabis saira,,", ",M. Lance
Pv12.344,Coloabis saira,,", ",M. Lance
Pv12.345,Labrid spp.,,", ",M. Lance
Pv12.345,Clupeid spp.,,", ",M. Lance
Pv12.345,Gadid or Merluccid,,", ",M. Lance
Pv12.345,Gadid or Merluccid,,", ",M. Lance
Pv12.345,Galiteuthis spp.,,", ",M. Lance
Pv12.346,Citharichthys stigmaeus,,", ",M. Lance
Pv12.346,Citharichthys stigmaeus,,", ",M. Lance
Pv12.346,Citharichthys stigmaeus,,", ",M. Lance
Pv12.346,Citharichthys stigmaeus,,", ",M. Lance
Pv12.347,Coloabis saira,,", ",M. Lance
Pv12.347,Coloabis saira,,", ",M. Lance
Pv12.347,Coloabis saira,,", ",M. Lance
Pv12.348,Diaphus theta,,", ",M. Lance
Pv12.348,Diaphus theta,,", ",M. Lance
Pv12.348,Citharichthys stigmaeus,,", ",M. Lance
Pv12.348,Citharichthys stigmaeus,,", ",M. Lance
Pv12.348,Citharichthys stigmaeus,,", ",M. Lance
Pv12.349,Gonatus spp.,,", ",M. Lance
Pv12.349,Gonatus spp.,,", ",M. Lance
Pv12.349,Citharichthys stigmaeus,,", ",M. Lance
Pv12.349,Citharichthys stigmaeus,,", ",M. Lance
Pv12.349,Citharichthys stigmaeus,,", ",M. Lance
Pv12.349,Zoarcid spp.,,", ",M. Lance
Pv12.349,Zoarcid spp.,,", ",M. Lance
Pv12.350,Gadid or Merluccid,,", ",M. Lance
Pv12.351,Merluccius productus,,", ",M. Lance
Pv12.351,Merluccius productus,,", ",M. Lance
Pv12.351,Merluccius productus,,", ",M. Lance
Pv12.351,Clupeid spp.,,", ",M. Lance
Pv12.352,Lampetra tridentata,,", ",M. Lance
Pv12.352,Lampetra tridentata,,", ",M. Lance
Pv12.352,Lampetra tridentata,,", ",M. Lance
Pv12.352,Citharichthys stigmaeus,,", ",M. Lance
Pv12.352,Citharichthys stigmaeus,,", ",M. Lance
Pv12.352,Cyclopterid spp.,,", ",M. Lance
Pv12.352,Merluccius productus,,", ",M. Lance
Pv12.352,Merluccius productus,,", ",M. Lance
Pv12.352,Merluccius productus,,", ",M. Lance
Pv12.353,Citharichthys stigmaeus,,", ",M. Lance
Pv12.353,Citharichthys stigmaeus,,", ",M. Lance
Pv12.353,Citharichthys stigmaeus,,", ",M. Lance
Pv12.354,Citharichthys stigmaeus,,", ",M. Lance
Pv12.354,Citharichthys stigmaeus,,", ",M. Lance
Pv12.354,Citharichthys stigmaeus,,", ",M. Lance
Pv12.355,Citharichthys stigmaeus,,", ",M. Lance
Pv12.355,Citharichthys stigmaeus,,", ",M. Lance
Pv12.355,Citharichthys stigmaeus,,", ",M. Lance
Pv12.356,Diaphus theta,,", ",M. Lance
Pv12.356,Diaphus theta,,", ",M. Lance
Pv12.356,Merluccius productus,,", ",M. Lance
Pv12.356,Merluccius productus,,", ",M. Lance
Pv12.356,Merluccius productus,,", ",M. Lance
Pv12.356,Citharichthys stigmaeus,,", ",M. Lance
Pv12.356,Citharichthys stigmaeus,,", ",M. Lance
Pv12.356,Ommasteuthid spp.,,", juv/ad?",M. Lance
Pv12.356,Ommasteuthid spp.,,", ad",M. Lance
Pv12.357,Merluccius productus,,", ",M. Lance
Pv12.357,Merluccius productus,,", ",M. Lance
Pv12.358,Gonatus spp.,,", ",M. Lance
Pv12.358,Merluccius productus,,", ",M. Lance
Pv12.358,Merluccius productus,,", ",M. Lance
Pv12.358,Thaleichthys pacificus,,", ",M. Lance
Pv12.359,Diaphus theta,,", ",M. Lance
Pv12.359,Merluccius productus,,", ",M. Lance
Pv12.359,Merluccius productus,,", ",M. Lance
Pv12.359,Merluccius productus,,", ",M. Lance
Pv12.359,Clupeid spp.,,", ",M. Lance
Pv12.360,Merluccius productus,,", ",M. Lance
Pv12.360,Merluccius productus,,", ",M. Lance
Pv12.361,Merluccius productus,,", ",M. Lance
Pv12.362,Oncorhynchus spp.,Adult,", ad",M. Lance
Pv12.363,Oncorhynchus spp.,Adult,", ad",M. Lance
Pv12.364,Oncorhynchus spp.,Adult,", ad",M. Lance
Pv12.365,Oncorhynchus spp.,Adult,", ad",M. Lance
Pv12.366,Oncorhynchus spp.,Adult,", ad",M. Lance
Pv12.367,Oncorhynchus spp.,Adult,", no id poss - ad?",M. Lance
Pv12.367,Oncorhynchus spp.,Adult,", ad",M. Lance
Pv12.368,Oncorhynchus spp.,Adult,", no id poss - ad",M. Lance
Pv12.368,Oncorhynchus spp.,Adult,", ad",M. Lance
Pv12.369,Oncorhynchus spp.,Adult,", ad",M. Lance
Pv12.370,Oncorhynchus spp.,Adult,", ad",M. Lance
Pv12.371,Oncorhynchus spp.,,", ",M. Lance
Pv12.371,Unidentified flatfish,,", ",M. Lance
Pv12.371,Labrid spp.,,", ",M. Lance
Pv12.371,Thaleichthys pacificus,,", ",M. Lance
Pv12.371,Thaleichthys pacificus,,", ",M. Lance
Pv12.371,Thaleichthys pacificus,,", ",M. Lance
Pv12.371,Clupeid spp.,,", cf SARSAG",M. Lance
Pv12.373,Oncorhynchus tshawytscha,Juvenile,", juv",M. Lance
Pv12.373,Clupeid spp.,,", ",M. Lance
Pv12.374,Bothid spp.,,", ",M. Lance
Pv12.374,Bothid spp.,,", ",M. Lance
Pv12.374,Oncorhynchus tshawytscha,Juvenile,", juv",M. Lance
Pv12.374,Oncorhynchus tshawytscha,Juvenile,", juv",M. Lance
Pv12.374,Oncorhynchus tshawytscha,Juvenile,", juv",M. Lance
Pv12.374,Oncorhynchus tshawytscha,Juvenile,", juv",M. Lance
Pv12.374,Citharichthys stigmaeus,,", ",M. Lance
Pv12.374,Citharichthys stigmaeus,,", ",M. Lance
Pv12.374,Citharichthys stigmaeus,,", ",M. Lance
Pv12.375,Clupeid spp.,,", ",M. Lance
Pv12.375,Oncorhynchus tshawytscha,Adult,", juv/ad?",M. Lance
Pv12.375,Oncorhynchus tshawytscha,Adult,", juv/ad?",M. Lance
Pv12.375,Oncorhynchus tshawytscha,Adult,", juv/ad?",M. Lance
Pv12.375,Ommasteuthid spp.,,", juv/ad?",M. Lance
Pv12.375,Hexagrammid spp.,,", ",M. Lance
Pv12.376,Clupeid spp.,,", ",M. Lance
Pv12.376,Ommasteuthid spp.,,", juv",M. Lance
Pv12.376,Ommasteuthid spp.,,", juv",M. Lance
Pv12.376,Oncorhynchus tshawytscha,Juvenile,", juv",M. Lance
Pv12.376,Oncorhynchus tshawytscha,Juvenile,", juv",M. Lance
Pv12.377,Oncorhynchus spp.,Adult,", ad",M. Lance
Pv12.378,Thaleichthys pacificus,,", ",M. Lance
Pv12.379,Oncorhynchus spp.,Adult,", ad",M. Lance
Pv12.381,Clupeid spp.,,", ",M. Lance
Pv12.383,Thaleichthys pacificus,,", ",M. Lance
Pv12.384,Clupeid spp.,,", ",M. Lance
Pv12.384,Thaleichthys pacificus,,", ",M. Lance
Pv12.384,Thaleichthys pacificus,,", ",M. Lance
Pv12.385,Myxinid species,,", ",M. Lance
Pv12.386,Thaleichthys pacificus,,", ",M. Lance
Pv12.386,Thaleichthys pacificus,,", ",M. Lance
Pv12.386,Thaleichthys pacificus,,", ",M. Lance
Pv12.387,Bathylagid spp.,,", ",M. Lance
Pv12.388,Citharichthys stigmaeus,,", ",M. Lance
Pv12.388,Citharichthys stigmaeus,,", ",M. Lance
Pv12.388,Oncorhynchus tshawytscha,Juvenile,", juv",M. Lance
Pv12.388,Ommasteuthid spp.,,", ad",M. Lance
Pv12.388,Ommasteuthid spp.,,", ad",M. Lance
Pv12.388,Oncorhynchus tshawytscha,Juvenile,", juv",M. Lance
Pv12.388,Oncorhynchus tshawytscha,,", ",M. Lance
Pv12.390,Thaleichthys pacificus,,", ",M. Lance
Pv12.391,Bathylagid spp.,,", ad: 5.6 mm LRL",M. Lance
Pv12.391,Bathylagid spp.,,", ",M. Lance
Pv12.391,Citharichthys stigmaeus,,", ",M. Lance
Pv12.391,Citharichthys stigmaeus,,", ",M. Lance
Pv12.392,Citharichthys stigmaeus,,", ",M. Lance
Pv12.392,Citharichthys stigmaeus,,", ",M. Lance
Pv12.392,Thaleichthys pacificus,,", ",M. Lance
Pv12.393,Bathylagid spp.,,", ",M. Lance
Pv12.393,Bathylagid spp.,,", ",M. Lance
Pv12.393,Citharichthys stigmaeus,,", ",M. Lance
Pv12.393,Citharichthys stigmaeus,,", ",M. Lance
Pv12.393,Citharichthys stigmaeus,,", ",M. Lance
Pv12.395,Myxinid species,,", ",M. Lance
Pv12.396,Clupeid spp.,,", ",M. Lance
Pv12.396,Sardinops sagax,,", striated pc",M. Lance
Pv12.396,Thaleichthys pacificus,,", ",M. Lance
Pv12.396,Thaleichthys pacificus,,", ",M. Lance
Pv12.396,Osmerid spp.,,", ",M. Lance
Pv12.396,Oncorhynchus tshawytscha,Juvenile,", juv",M. Lance
Pv12.396,Oncorhynchus tshawytscha,Juvenile,", juv",M. Lance
Pv12.396,Oncorhynchus tshawytscha,Juvenile,", juv",M. Lance
Pv12.396,Ommasteuthid spp.,,", juv",M. Lance
Pv12.396,Oncorhynchus tshawytscha,Juvenile,", juv",M. Lance
Pv12.396,Spirinchus thaleichthys,,", ",M. Lance
Pv12.396,Spirinchus thaleichthys,,", ",M. Lance
Pv12.397,Thaleichthys pacificus,,", ",M. Lance
Pv12.397,Thaleichthys pacificus,,", ",M. Lance
Pv12.397,Thaleichthys pacificus,,", ",M. Lance
Pv12.397,Gadid or Merluccid,,", ",M. Lance
Pv12.397,Gadid or Merluccid,,", ",M. Lance
Pv12.397,Clupeid spp.,,", ",M. Lance
Pv12.398,Citharichthys stigmaeus,,", ",M. Lance
Pv12.398,Gadid or Merluccid,,", ",M. Lance
Pv12.398,Labrid spp.,,", ",M. Lance
Pv12.398,Oncorhynchus tshawytscha,Juvenile,", juv",M. Lance
Pv12.399,Oncorhynchus spp.,Juvenile,", juv",M. Lance
Pv12.400,Thaleichthys pacificus,,", ",M. Lance
Pv12.400,Thaleichthys pacificus,,", ",M. Lance
Pv12.401,Oncorhynchus spp.,Adult,", ad",M. Lance
Pv12.401,Citharichthys stigmaeus,,", ",M. Lance
Pv12.403,Oncorhynchus spp.,Adult,", ad",M. Lance
Pv12.404,Oncorhynchus spp.,Adult,", ad",M. Lance
Pv12.405,Oncorhynchus spp.,Adult,", ad",M. Lance
Pv12.406,Pholid spp.,,", ",M. Lance
Pv12.406,Pholid spp.,,", ",M. Lance
Pv12.406,Pholid spp.,,", ",M. Lance
Pv12.407,Oncorhynchus spp.,Adult,", ad",M. Lance
Pv12.408,Oncorhynchus spp.,Adult,", ad",M. Lance
Pv12.409,Oncorhynchus spp.,Adult,", ad",M. Lance
Pv12.410,Oncorhynchus spp.,Adult,", ad",M. Lance
Pv12.411,Oncorhynchus spp.,Adult,", ad",M. Lance
Pv12.412,Oncorhynchus spp.,Adult,", ad",M. Lance
Pv12.413,Oncorhynchus tshawytscha,Adult,", ad",M. Lance
Pv12.413,Oncorhynchus tshawytscha,Adult,", ad",M. Lance
Pv12.413,Oncorhynchus tshawytscha,Adult,", ad",M. Lance
Pv12.413,Labrid spp.,,", ",M. Lance
Pv12.414,Oncorhynchus spp.,Adult,", ad",M. Lance
Pv12.415,Bathylagid spp.,,", ",M. Lance
Pv12.415,Bathylagid spp.,,", ",M. Lance
Pv12.415,Oncorhynchus spp.,Adult,", ad",M. Lance
Pv12.416,Oncorhynchus spp.,Adult,", ad",M. Lance
Pv12.417,Oncorhynchus spp.,Adult,", ad",M. Lance
Pv12.418,Oncorhynchus spp.,Adult,", ad",M. Lance
Pv12.419,Oncorhynchus spp.,Adult,", ad",M. Lance
Pv12.419,Labrid spp.,,", ",M. Lance
Pv12.420,Oncorhynchus spp.,Adult,", ad",M. Lance
Pv12.422,Bathylagid spp.,,", ",M. Lance
Pv12.422,Bathylagid spp.,,", ",M. Lance
Pv12.422,Bathylagid spp.,,", ",M. Lance
Pv12.422,Lampetra tridentata,,", ",M. Lance
Pv12.422,Lampetra tridentata,,", ",M. Lance
Pv12.422,Lampetra tridentata,,", ",M. Lance
Pv12.422,Merluccius productus,,", ",M. Lance
Pv12.422,Merluccius productus,,", ",M. Lance
Pv12.422,Merluccius productus,,", ",M. Lance
Pv12.422,Oncorhynchus tshawytscha,Juvenile,", juv",M. Lance
Pv12.422,Oncorhynchus tshawytscha,Juvenile,", juv",M. Lance
Pv12.423,Oncorhynchus spp.,Adult,", ad",M. Lance
Pv12.423,Clupeid spp.,,", ",M. Lance
Pv12.424,Oncorhynchus spp.,Adult,", ad",M. Lance
Pv12.425,Oncorhynchus spp.,Adult,", ad",M. Lance
Pv12.426,Oncorhynchus spp.,,", ",M. Lance
Pv12.427,Lampetra tridentata,,", ",M. Lance
Pv12.427,Lampetra tridentata,,", ",M. Lance
Pv12.427,Lampetra tridentata,,", ",M. Lance
Pv12.427,Citharichthys stigmaeus,,", ",M. Lance
Pv12.427,Citharichthys stigmaeus,,", ",M. Lance
Pv12.427,Osmerid spp.,,", ",M. Lance
Pv12.427,Osmerid spp.,,", ",M. Lance
Pv12.427,Osmerid spp.,,", ",M. Lance
Pv12.427,Cyclopterid spp.,,", ",M. Lance
Pv12.427,Cyclopterid spp.,,", ",M. Lance
Pv12.428,Oncorhynchus spp.,Adult,", ad",M. Lance
Pv12.429,Merluccius productus,,", ",M. Lance
Pv12.429,Oncorhynchus spp.,Adult,", ad",M. Lance
Pv12.429,Pleuronectes vetulus,,", ",M. Lance
Pv12.429,Pleuronectes vetulus,,", ",M. Lance
Pv12.429,Pholid spp.,,", ",M. Lance
Pv12.429,Pholid spp.,,", ",M. Lance
Pv12.429,Pholid spp.,,", ",M. Lance
Pv12.430,Myxinid species,,", ",M. Lance
Pv12.431,Merluccius productus,,", ",M. Lance
Pv12.432,Oncorhynchus tshawytscha,Juvenile,", juv",M. Lance
Pv12.432,Oncorhynchus tshawytscha,Juvenile,", juv",M. Lance
Pv12.432,Clupeid spp.,,", ",M. Lance
Pv12.433,Gadid or Merluccid,,", ",M. Lance
Pv12.433,Oncorhynchus spp.,Juvenile,", juv",M. Lance
Pv12.433,Clupeid spp.,,", ",M. Lance
Pv12.434,Porichthys notatus,,", ",M. Lance
Pv12.434,Merluccius productus,,", ",M. Lance
Pv12.434,Merluccius productus,,", ",M. Lance
Pv12.434,Clupeid spp.,,", ",M. Lance
Pv12.435,Thaleichthys pacificus,,", ",M. Lance
Pv12.435,Thaleichthys pacificus,,", ",M. Lance
Pv12.435,Thaleichthys pacificus,,", ",M. Lance
Pv12.436,Thaleichthys pacificus,,", ",M. Lance
Pv12.436,Thaleichthys pacificus,,", ",M. Lance
Pv12.436,Thaleichthys pacificus,,", ",M. Lance
Pv12.437,Oncorhynchus spp.,Adult,", ad",M. Lance
Pv12.438,Oncorhynchus spp.,Adult,", ad",M. Lance
Pv12.439,Cyclopterid spp.,,", ",M. Lance
Pv12.439,Cyclopterid spp.,,", ",M. Lance
Pv12.440,Merluccius productus,,", ",M. Lance
Pv12.440,Merluccius productus,,", ",M. Lance
Pv12.440,Clupeid spp.,,", ",M. Lance
Pv12.441,Gadid or Merluccid,,", ",M. Lance
Pv12.442,Gadid or Merluccid,,", ",M. Lance
Pv12.442,Clupeid spp.,,", ",M. Lance
Pv12.443,Thaleichthys pacificus,,", ",M. Lance
Pv12.444,Citharichthys stigmaeus,,", ",M. Lance
Pv12.444,Citharichthys stigmaeus,,", ",M. Lance
Pv12.444,Citharichthys stigmaeus,,", ",M. Lance
Pv12.444,Lampetra tridentata,,", ",M. Lance
Pv12.444,Lampetra tridentata,,", ",M. Lance
Pv12.444,Lampetra tridentata,,", ",M. Lance
Pv12.444,Cyclopterid spp.,,", ",M. Lance
Pv12.444,Cyclopterid spp.,,", ",M. Lance
Pv12.444,Gadid or Merluccid,,", ",M. Lance
Pv12.444,Gadid or Merluccid,,", ",M. Lance
Pv12.445,Oncorhynchus tshawytscha,Adult,", ad",M. Lance
Pv12.445,Oncorhynchus tshawytscha,Adult,", ad",M. Lance
Pv12.445,Thaleichthys pacificus,,", ",M. Lance
Pv12.445,Thaleichthys pacificus,,", ",M. Lance
Pv12.445,Thaleichthys pacificus,,", ",M. Lance
Pv12.445,Citharichthys stigmaeus,,", ",M. Lance
Pv12.445,Citharichthys stigmaeus,,", ",M. Lance
Pv12.445,Citharichthys stigmaeus,,", ",M. Lance
Pv12.446,Thaleichthys pacificus,,", ",M. Lance
Pv12.446,Thaleichthys pacificus,,", ",M. Lance
Pv12.446,Thaleichthys pacificus,,", ",M. Lance
Pv12.446,Cyclopterid spp.,,", ",M. Lance
Pv12.446,Cyclopterid spp.,,", ",M. Lance
Pv12.446,Cyclopterid spp.,,", ",M. Lance
Pv12.447,Oncorhynchus spp.,Adult,", ad",M. Lance
Pv12.448,Merluccius productus,,", ",M. Lance
Pv12.448,Merluccius productus,,", ",M. Lance
Pv12.449,Thaleichthys pacificus,,", ",M. Lance
Pv12.449,Thaleichthys pacificus,,", ",M. Lance
Pv12.449,Thaleichthys pacificus,,", ",M. Lance
Pv12.450,Thaleichthys pacificus,,", ",M. Lance
Pv12.450,Thaleichthys pacificus,,", ",M. Lance
Pv12.450,Thaleichthys pacificus,,", ",M. Lance
Pv12.451,Citharichthys stigmaeus,,", ",M. Lance
Pv12.451,Lampetra tridentata,,", ",M. Lance
Pv12.451,Lampetra tridentata,,", ",M. Lance
Pv12.451,Cyclopterid spp.,,", ",M. Lance
Pv12.451,Cyclopterid spp.,,", ",M. Lance
Pv12.451,Cyclopterid spp.,,", ",M. Lance
Pv12.452,Unidentified flatfish,,", ",M. Lance
Pv12.452,Merluccius productus,,", ",M. Lance
Pv12.452,Merluccius productus,,", ",M. Lance
Pv12.452,Merluccius productus,,", ",M. Lance
Pv12.453,Lampetra tridentata,,", ",M. Lance
Pv12.453,Lampetra tridentata,,", ",M. Lance
Pv12.453,Cyclopterid spp.,,", ",M. Lance
Pv12.453,Cyclopterid spp.,,", ",M. Lance
Pv12.453,Cyclopterid spp.,,", ",M. Lance
Pv12.454,Oncorhynchus spp.,Adult,", ad",M. Lance
Pv12.455,Myxinid species,,", ",M. Lance
Pv12.456,Cyclopterid spp.,,", ",M. Lance
Pv12.456,Cyclopterid spp.,,", ",M. Lance
Pv12.456,Cyclopterid spp.,,", ",M. Lance
Pv12.456,Unidentified flatfish,,", crab",M. Lance
Pv12.457,Gonatus spp.,,", ",M. Lance
Pv12.457,Citharichthys stigmaeus,,", ",M. Lance
Pv12.457,Citharichthys stigmaeus,,", ",M. Lance
Pv12.457,Citharichthys stigmaeus,,", ",M. Lance
Pv12.457,Labrid spp.,,", ",M. Lance
Pv12.457,Oncorhynchus spp.,Juvenile,", juv",M. Lance
Pv12.459,Merluccius productus,,", ",M. Lance
Pv12.459,Platichthys stellatus,,", ",M. Lance
Pv12.459,Clupeid spp.,,", ",M. Lance
Pv12.459,Myxinid species,,", ",M. Lance
Pv12.460,Pleuronectes vetulus,,", ",M. Lance
Pv12.460,Pleuronectes vetulus,,", ",M. Lance
Pv12.460,Pleuronectes vetulus,,", ",M. Lance
Pv12.460,Cyclopterid spp.,,", ",M. Lance
Pv12.460,Cyclopterid spp.,,", ",M. Lance
Pv12.461,Merluccius productus,,", ",M. Lance
Pv12.463,Merluccius productus,,", ",M. Lance
Pv12.463,Merluccius productus,,", ",M. Lance
Pv12.464,Cyclopterid spp.,,", ",M. Lance
Pv12.464,Cyclopterid spp.,,", ",M. Lance
Pv12.464,Gadid or Merluccid,,", ",M. Lance
Pv12.464,Gadid or Merluccid,,", ",M. Lance
Pv12.464,Zoarcid spp.,,", ",M. Lance
Pv12.464,Zoarcid spp.,,", ",M. Lance
Pv12.464,Zoarcid spp.,,", ",M. Lance
Pv12.465,Citharichthys stigmaeus,,", ",M. Lance
Pv12.465,Citharichthys stigmaeus,,", ",M. Lance
Pv12.465,Citharichthys stigmaeus,,", ",M. Lance
Pv12.465,Coloabis saira,,", ",M. Lance
Pv12.466,Lampetra tridentata,,", ",M. Lance
Pv12.466,Lampetra tridentata,,", ",M. Lance
Pv12.466,Lampetra tridentata,,", ",M. Lance
Pv12.466,Oncorhynchus spp.,Adult,", ad",M. Lance
Pv12.466,Stichaeid spp.,,", ",M. Lance
Pv12.466,Stichaeid spp.,,", ",M. Lance
Pv12.466,Stichaeid spp.,,", ",M. Lance
Pv12.468,Citharichthys stigmaeus,,", ",M. Lance
Pv12.468,Citharichthys stigmaeus,,", ",M. Lance
Pv12.468,Citharichthys stigmaeus,,", ",M. Lance
Pv12.469,Citharichthys stigmaeus,,", ",M. Lance
Pv12.469,Citharichthys stigmaeus,,", ",M. Lance
Pv12.469,Citharichthys stigmaeus,,", ",M. Lance
Pv12.472,Lampetra tridentata,,", ",M. Lance
Pv12.472,Cyclopterid spp.,,", ",M. Lance
Pv12.474,Clupeid spp.,,", ",M. Lance
Pv12.474,Unidentified flatfish,,", ",M. Lance
Pv12.475,Clupeid spp.,,", ",M. Lance
Pv12.475,Thaleichthys pacificus,,", ",M. Lance
Pv12.476,Oncorhynchus spp.,Adult,", ad",M. Lance
Pv12.477,Oncorhynchus tshawytscha,Juvenile,", juv",M. Lance
Pv12.477,Oncorhynchus tshawytscha,Juvenile,", juv",M. Lance
Pv12.477,Oncorhynchus tshawytscha,Juvenile,", juv",M. Lance
Pv12.479,Citharichthys stigmaeus,,", ",M. Lance
Pv12.479,Citharichthys stigmaeus,,", ",M. Lance
Pv12.479,Citharichthys stigmaeus,,", ",M. Lance
Pv12.479,Oncorhynchus spp.,Adult,", juv/ad?",M. Lance
Pv12.479,Oncorhynchus spp.,Adult,", ad",M. Lance
Pv12.480,Lampetra tridentata,,", ",M. Lance
Pv12.480,Lampetra tridentata,,", ",M. Lance
Pv12.480,Lampetra tridentata,,", ",M. Lance
Pv12.480,Unidentified flatfish,,", poss CYMAGG?",M. Lance
Pv12.481,Merluccius productus,,", ",M. Lance
Pv12.481,Merluccius productus,,", ",M. Lance
Pv12.481,Merluccius productus,,", ",M. Lance
Pv12.481,Stichaeid spp.,,", ",M. Lance
Pv12.481,Stichaeid spp.,,", ",M. Lance
Pv12.481,Stichaeid spp.,,", ",M. Lance
Pv12.482,Oncorhynchus tshawytscha,Juvenile,", juv",M. Lance
Pv12.482,Oncorhynchus tshawytscha,Juvenile,", juv",M. Lance
Pv12.482,Oncorhynchus tshawytscha,Juvenile,", juv",M. Lance
Pv12.482,Alosa sapidissima,,", ",M. Lance
Pv12.482,Alosa sapidissima,,", ",M. Lance
Pv12.482,Alosa sapidissima,,", ",M. Lance
Pv12.483,Merluccius productus,,", ",M. Lance
Pv12.483,Merluccius productus,,", ",M. Lance
Pv12.483,Merluccius productus,,", ",M. Lance
Pv12.484,Citharichthys stigmaeus,,", ",M. Lance
Pv12.484,Citharichthys stigmaeus,,", ",M. Lance
Pv12.484,Citharichthys stigmaeus,,", ",M. Lance
Pv12.484,Platichthys stellatus,,", ",M. Lance
Pv12.484,Platichthys stellatus,,", ",M. Lance
Pv12.484,Platichthys stellatus,,", ",M. Lance
Pv12.485,Citharichthys stigmaeus,,", ",M. Lance
Pv12.485,Citharichthys stigmaeus,,", ",M. Lance
Pv12.485,Citharichthys stigmaeus,,", ",M. Lance
Pv12.486,Stichaeid spp.,,", ",M. Lance
Pv12.486,Stichaeid spp.,,", ",M. Lance
Pv12.486,Stichaeid spp.,,", ",M. Lance
Pv12.487,Octopus spp.,,", ",M. Lance
Pv12.487,Lampetra tridentata,,", ",M. Lance
Pv12.487,Lampetra tridentata,,", ",M. Lance
Pv12.487,Lampetra tridentata,,", ",M. Lance
Pv12.487,Platichthys stellatus,,", 2 sz",M. Lance
Pv12.487,Platichthys stellatus,,", ",M. Lance
Pv12.487,Cyclopterid spp.,,", ",M. Lance
Pv12.487,Cyclopterid spp.,,", ",M. Lance
Pv12.487,Cyclopterid spp.,,", ",M. Lance
Pv12.487,Coloabis saira,,", ",M. Lance
Pv12.487,Unidentified flatfish,,", ",M. Lance
Pv12.487,Unidentified flatfish,,", ",M. Lance
Pv12.488,Bathylagid spp.,,", ",M. Lance
Pv12.488,Gadid or Merluccid,,", ",M. Lance
Pv12.488,Gadid or Merluccid,,", ",M. Lance
Pv12.488,Citharichthys stigmaeus,,", ",M. Lance
Pv12.488,Citharichthys stigmaeus,,", ",M. Lance
Pv12.488,Citharichthys stigmaeus,,", ",M. Lance
Pv12.488,Citharichthys stigmaeus,,", ",M. Lance
Pv12.489,Citharichthys stigmaeus,,", ",M. Lance
Pv12.489,Citharichthys stigmaeus,,", ",M. Lance
Pv12.489,Citharichthys stigmaeus,,", ",M. Lance
Pv12.489,Alosa sapidissima,,", ",M. Lance
Pv12.489,Alosa sapidissima,,", ",M. Lance
Pv12.491,Oncorhynchus spp.,Adult,", ad, eggs?",M. Lance
Pv12.492,Unidentified flatfish,,", ",M. Lance
Pv12.493,Citharichthys stigmaeus,,", ",M. Lance
Pv12.493,Citharichthys stigmaeus,,", ",M. Lance
Pv12.493,Lampetra tridentata,,", ",M. Lance
Pv12.493,Alosa sapidissima,,", ",M. Lance
Pv12.495,Oncorhynchus spp.,Adult,", ad",M. Lance
Pv12.495,Alosa sapidissima,,", ",M. Lance
Pv12.495,Alosa sapidissima,,", ",M. Lance
Pv12.496,Bathylagid spp.,,", ",M. Lance
Pv12.496,Merluccius productus,,", ",M. Lance
Pv12.496,Merluccius productus,,", ",M. Lance
Pv12.496,Merluccius productus,,", ",M. Lance
Pv12.496,Pholid spp.,,", ",M. Lance
Pv12.496,Pholid spp.,,", ",M. Lance
Pv12.496,Pholid spp.,,", ",M. Lance
Pv12.497,Oncorhynchus spp.,Adult,", ad",M. Lance
Pv12.497,Clupeid spp.,,", ",M. Lance
Pv12.497,Platichthys stellatus,,", ",M. Lance
Pv12.497,Platichthys stellatus,,", ",M. Lance
Pv12.498,Oncorhynchus spp.,Adult,", ad",M. Lance
Pv12.499,Oncorhynchus spp.,Adult,", ad",M. Lance
Pv12.500,Oncorhynchus spp.,Adult,", ad",M. Lance
Pv12.500,Platichthys stellatus,,", ",M. Lance
Pv12.500,Platichthys stellatus,,", ",M. Lance
Pv12.501,Oncorhynchus spp.,Adult,", ad",M. Lance
Pv12.501,Stichaeid spp.,,", ",M. Lance
Pv12.502,Oncorhynchus spp.,Adult,", ad",M. Lance
Pv12.502,Oncorhynchus tshawytscha,Juvenile,", juv",M. Lance
Pv12.504,Oncorhynchus spp.,Adult,", ad",M. Lance
Pv12.505,Oncorhynchus spp.,Adult,", ad",M. Lance
Pv12.506,Oncorhynchus spp.,Adult,", ad",M. Lance
Pv12.507,Oncorhynchus spp.,Adult,", ad",M. Lance
Pv12.508,Oncorhynchus spp.,Adult,", ad",M. Lance
Pv12.509,Oncorhynchus spp.,Adult,", ad",M. Lance
Pv12.509,Oncorhynchus spp.,Adult,", ad",M. Lance
Pv12.510,Oncorhynchus spp.,Adult,", ad",M. Lance
Pv12.511,Myxinid species,,", ",M. Lance
Pv12.512,Oncorhynchus spp.,Adult,", ad",M. Lance
Pv12.513,Oncorhynchus spp.,Adult,", ad",M. Lance
Pv12.514,Clupeid spp.,,", ",M. Lance
Pv12.514,Platichthys stellatus,,", ",M. Lance
Pv12.514,Platichthys stellatus,,", ",M. Lance
Pv12.514,Platichthys stellatus,,", ",M. Lance
Pv12.514,Unidentified flatfish,,", ",M. Lance
Pv12.515,Citharichthys stigmaeus,,", ",M. Lance
Pv12.515,Citharichthys stigmaeus,,", ",M. Lance
Pv12.515,Citharichthys stigmaeus,,", ",M. Lance
Pv12.516,Thaleichthys pacificus,,", ",M. Lance
Pv12.516,Thaleichthys pacificus,,", ",M. Lance
Pv12.516,Thaleichthys pacificus,,", ",M. Lance
Pv12.516,Citharichthys stigmaeus,,", ",M. Lance
Pv12.516,Citharichthys stigmaeus,,", ",M. Lance
Pv12.516,Citharichthys stigmaeus,,", ",M. Lance
Pv12.516,Alosa sapidissima,,", ",M. Lance
Pv12.516,Alosa sapidissima,,", ",M. Lance
Pv12.516,Alosa sapidissima,,", ",M. Lance
Pv12.517,Citharichthys stigmaeus,,", ",M. Lance
Pv12.517,Citharichthys stigmaeus,,", ",M. Lance
Pv12.517,Citharichthys stigmaeus,,", ",M. Lance
Pv12.518,Citharichthys stigmaeus,,", ",M. Lance
Pv12.518,Citharichthys stigmaeus,,", ",M. Lance
Pv12.518,Citharichthys stigmaeus,,", ",M. Lance
Pv12.518,Oncorhynchus tshawytscha,Adult,", poss 1=blackmouth?",M. Lance
Pv12.518,Oncorhynchus tshawytscha,Juvenile,", juv",M. Lance
Pv12.518,Alosa sapidissima,,", ",M. Lance
Pv12.518,Alosa sapidissima,,", ",M. Lance
Pv12.518,Oncorhynchus tshawytscha,Juvenile,", juv",M. Lance
Pv12.518,Oncorhynchus tshawytscha,Juvenile,", juv",M. Lance
Pv12.519,Myxinid species,,", ",M. Lance
Pv12.520,Citharichthys stigmaeus,,", ",M. Lance
Pv12.520,Citharichthys stigmaeus,,", ",M. Lance
Pv12.520,Citharichthys stigmaeus,,", ",M. Lance
Pv12.520,Labrid spp.,,", ",M. Lance
Pv12.522,Clupeid spp.,,", ",M. Lance
Pv12.522,Gadid or Merluccid,,", ",M. Lance
Pv12.522,Trichodon trichodon,,", dogfish or skate",M. Lance
Pv12.523,Merluccius productus,,", ",M. Lance
Pv12.523,Merluccius productus,,", ",M. Lance
Pv12.523,Merluccius productus,,", ",M. Lance
Pv12.523,Thaleichthys pacificus,,", ",M. Lance
Pv12.523,Citharichthys stigmaeus,,", ",M. Lance
Pv12.523,Citharichthys stigmaeus,,", ",M. Lance
Pv12.524,Thaleichthys pacificus,,", ",M. Lance
Pv12.524,Thaleichthys pacificus,,", ",M. Lance
Pv12.526,Thaleichthys pacificus,,", ",M. Lance
Pv12.526,Thaleichthys pacificus,,", ",M. Lance
Pv12.526,Merluccius productus,,", ",M. Lance
Pv12.526,Merluccius productus,,", ",M. Lance
Pv12.527,Oncorhynchus spp.,Adult,", ad",M. Lance
Pv12.527,Citharichthys stigmaeus,,", ",M. Lance
Pv12.527,Citharichthys stigmaeus,,", ",M. Lance
Pv12.527,Citharichthys stigmaeus,,", ",M. Lance
Pv12.528,Bathylagid spp.,,", ",M. Lance
Pv12.528,Bathylagid spp.,,", ",M. Lance
Pv12.528,Labrid spp.,,", ",M. Lance
Pv12.528,Thaleichthys pacificus,,", ",M. Lance
Pv12.528,Thaleichthys pacificus,,", ",M. Lance
Pv12.528,Oncorhynchus spp.,Adult,", ad",M. Lance
Pv12.528,Oncorhynchus spp.,Adult,", ad",M. Lance
Pv12.528,Oncorhynchus spp.,Adult,", ad",M. Lance
Pv12.528,Citharichthys stigmaeus,,", ",M. Lance
Pv12.528,Citharichthys stigmaeus,,", ",M. Lance
Pv12.528,Citharichthys stigmaeus,,", ",M. Lance
Pv12.528,Sardinops sagax,,", ",M. Lance
Pv12.528,Sardinops sagax,,", ",M. Lance
Pv12.528,Sardinops sagax,,", striated pc",M. Lance
Pv12.530,Thaleichthys pacificus,,", ",M. Lance
Pv12.530,Thaleichthys pacificus,,", ",M. Lance
Pv12.530,Citharichthys stigmaeus,,", ",M. Lance
Pv12.530,Citharichthys stigmaeus,,", ",M. Lance
Pv12.530,Citharichthys stigmaeus,,", ",M. Lance
Pv12.531,Citharichthys stigmaeus,,", ",M. Lance
Pv12.531,Oncorhynchus tshawytscha,Juvenile,", juv",M. Lance
Pv12.531,Oncorhynchus tshawytscha,Juvenile,", juv",M. Lance
Pv12.531,Oncorhynchus tshawytscha,Juvenile,", juv",M. Lance
Pv12.532,Unidentified flatfish,,", ",M. Lance
Pv12.532,Gadid or Merluccid,,", ",M. Lance
Pv12.532,Oncorhynchus tshawytscha,Juvenile,", juv",M. Lance
Pv12.532,Oncorhynchus tshawytscha,Juvenile,", juv",M. Lance
Pv12.532,Citharichthys stigmaeus,,", ",M. Lance
Pv12.532,Citharichthys stigmaeus,,", ",M. Lance
Pv12.532,Labrid spp.,,", ",M. Lance
Pv12.533,Citharichthys stigmaeus,,", 2 sz",M. Lance
Pv12.533,Citharichthys stigmaeus,,", ",M. Lance
Pv12.533,Citharichthys stigmaeus,,", ",M. Lance
Pv12.534,Citharichthys stigmaeus,,", ",M. Lance
Pv12.534,Citharichthys stigmaeus,,", ",M. Lance
Pv12.534,Citharichthys stigmaeus,,", ",M. Lance
Pv12.535,Citharichthys stigmaeus,,", ",M. Lance
Pv12.535,Citharichthys stigmaeus,,", ",M. Lance
Pv12.536,Citharichthys stigmaeus,,", ",M. Lance
Pv12.536,Citharichthys stigmaeus,,", ",M. Lance
Pv12.537,Citharichthys stigmaeus,,", ",M. Lance
Pv12.537,Citharichthys stigmaeus,,", ",M. Lance
Pv12.537,Citharichthys stigmaeus,,", ",M. Lance
Pv12.537,Citharichthys stigmaeus,,", ",M. Lance
Pv12.537,Labrid spp.,,", ",M. Lance
Pv12.538,Citharichthys stigmaeus,,", ",M. Lance
Pv12.539,Thaleichthys pacificus,,", ",M. Lance
Pv12.539,Thaleichthys pacificus,,", ",M. Lance
Pv12.539,Rajid spp.,,", ",M. Lance
Pv12.540,Citharichthys stigmaeus,,", ",M. Lance
Pv12.540,Citharichthys stigmaeus,,", ",M. Lance
Pv12.541,Thaleichthys pacificus,,", ",M. Lance
Pv12.541,Cyclopterid spp.,,", ",M. Lance
Pv12.541,Citharichthys stigmaeus,,", ",M. Lance
Pv12.541,Citharichthys stigmaeus,,", ",M. Lance
Pv12.541,Citharichthys stigmaeus,,", ",M. Lance
Pv12.541,Thaleichthys pacificus,,", ",M. Lance
Pv12.542,Citharichthys stigmaeus,,", ",M. Lance
Pv12.542,Citharichthys stigmaeus,,", ",M. Lance
Pv12.542,Citharichthys stigmaeus,,", ",M. Lance
Pv12.543,Unidentified flatfish,,", ",M. Lance
Pv12.543,Sardinops sagax,,", ",M. Lance
Pv12.543,Citharichthys stigmaeus,,", ",M. Lance
Pv12.543,Citharichthys stigmaeus,,", ",M. Lance
Pv12.543,Citharichthys stigmaeus,,", ",M. Lance
Pv12.543,Oncorhynchus tshawytscha,Juvenile,", juv, 3 sz",M. Lance
Pv12.543,Oncorhynchus tshawytscha,Juvenile,", juv, 3 sz",M. Lance
Pv12.543,Oncorhynchus tshawytscha,,", ",M. Lance
Pv12.544,Citharichthys stigmaeus,,", ",M. Lance
Pv12.544,Citharichthys stigmaeus,,", ",M. Lance
Pv12.544,Citharichthys stigmaeus,,", ",M. Lance
Pv12.545,Thaleichthys pacificus,,", ",M. Lance
Pv12.545,Thaleichthys pacificus,,", ",M. Lance
Pv12.546,Citharichthys stigmaeus,,", ",M. Lance
Pv12.546,Citharichthys stigmaeus,,", ",M. Lance
Pv12.548,Thaleichthys pacificus,,", ",M. Lance
Pv12.548,Thaleichthys pacificus,,", ",M. Lance
Pv12.548,Thaleichthys pacificus,,", ",M. Lance
Pv12.548,Clupeid spp.,,", ",M. Lance
Pv12.549,Thaleichthys pacificus,,", ",M. Lance
Pv12.549,Thaleichthys pacificus,,", ",M. Lance
Pv12.549,Thaleichthys pacificus,,", ",M. Lance
Pv12.550,Thaleichthys pacificus,,", ",M. Lance
Pv12.550,Thaleichthys pacificus,,", ",M. Lance
Pv12.550,Thaleichthys pacificus,,", ",M. Lance
Pv12.550,Thaleichthys pacificus,,", ",M. Lance
Pv12.551,Citharichthys stigmaeus,,", ",M. Lance
Pv12.551,Citharichthys stigmaeus,,", ",M. Lance
Pv12.551,Citharichthys stigmaeus,,", ",M. Lance
Pv12.551,Thaleichthys pacificus,,", ",M. Lance
Pv12.552,Thaleichthys pacificus,,", ",M. Lance
Pv12.553,Clupeid spp.,,", ",M. Lance
Pv12.553,Galiteuthis spp.,,", ",M. Lance
Pv12.553,Syngnathus leptorhynchus,,", ",M. Lance
Pv12.554,Gadid or Merluccid,,", ",M. Lance
Pv12.554,Clupeid spp.,,", ",M. Lance
Pv12.555,Oncorhynchus spp.,Juvenile,", juv",M. Lance
Pv12.556,Bathylagid spp.,,", ",M. Lance
Pv12.556,Bathylagid spp.,,", ",M. Lance
Pv12.556,Citharichthys stigmaeus,,", ",M. Lance
Pv12.557,Bathylagid spp.,,", ",M. Lance
Pv12.557,Citharichthys stigmaeus,,", ",M. Lance
Pv12.558,Thaleichthys pacificus,,", ",M. Lance
Pv12.558,Thaleichthys pacificus,,", ",M. Lance
Pv12.558,Thaleichthys pacificus,,", ",M. Lance
Pv12.559,Clupeid spp.,,", ",M. Lance
Pv12.560,Bathylagid spp.,,", ",M. Lance
Pv12.560,Bathylagid spp.,,", ",M. Lance
Pv12.561,Citharichthys stigmaeus,,", ",M. Lance
Pv12.561,Citharichthys stigmaeus,,", ",M. Lance
Pv12.561,Citharichthys stigmaeus,,", ",M. Lance
Pv12.561,Gadid or Merluccid,,", ",M. Lance
Pv12.561,Labrid spp.,,", ",M. Lance
Pv12.562,Citharichthys stigmaeus,,", ",M. Lance
Pv12.562,Citharichthys stigmaeus,,", ",M. Lance
Pv12.562,Citharichthys stigmaeus,,", ",M. Lance
Pv12.562,Thaleichthys pacificus,,", ",M. Lance
Pv12.562,Thaleichthys pacificus,,", ",M. Lance
Pv12.562,Thaleichthys pacificus,,", ",M. Lance
Pv12.562,Gonatus spp.,,", ",M. Lance
Pv12.563,Citharichthys stigmaeus,,", ",M. Lance
Pv12.563,Citharichthys stigmaeus,,", ",M. Lance
Pv12.564,Citharichthys stigmaeus,,", ",M. Lance
Pv12.564,Citharichthys stigmaeus,,", ",M. Lance
Pv12.564,Citharichthys stigmaeus,,", ",M. Lance
Pv12.564,Unidentified flatfish,,", ",M. Lance
Pv12.565,Citharichthys stigmaeus,,", ",M. Lance
Pv12.565,Citharichthys stigmaeus,,", ",M. Lance
Pv12.565,Citharichthys stigmaeus,,", ",M. Lance
Pv12.566,Citharichthys stigmaeus,,", ",M. Lance
Pv12.566,Sebastes spp.,,", juv",M. Lance
Pv12.566,Sebastes spp.,,", juv",M. Lance
Pv12.567,Citharichthys stigmaeus,,", ",M. Lance
Pv12.567,Citharichthys stigmaeus,,", ",M. Lance
Pv12.567,Citharichthys stigmaeus,,", ",M. Lance
Pv12.567,Citharichthys stigmaeus,,", ",M. Lance
Pv12.567,Myxinid species,,", ",M. Lance
Pv12.569,Cyclopterid spp.,,", ",M. Lance
Pv12.569,Cyclopterid spp.,,", ",M. Lance
Pv12.569,Oncorhynchus tshawytscha,Adult,", ad
ad",M. Lance
Pv12.569,Oncorhynchus tshawytscha,Adult,", ad",M. Lance
Pv12.569,Oncorhynchus tshawytscha,Adult,", ad",M. Lance
Pv12.569,Oncorhynchus tshawytscha,Juvenile,", juv",M. Lance
Pv12.569,Lampetra tridentata,,", ",M. Lance
Pv12.569,Lampetra tridentata,,", ",M. Lance
Pv12.569,Lampetra tridentata,,", ",M. Lance
Pv12.569,Unidentified flatfish,,", crab pc",M. Lance
Pv12.570,Cyclopterid spp.,,", ",M. Lance
Pv12.570,Cyclopterid spp.,,", ",M. Lance
Pv12.570,Cyclopterid spp.,,", ",M. Lance
Pv12.570,Lampetra tridentata,,", ",M. Lance
Pv12.570,Lampetra tridentata,,", ",M. Lance
Pv12.570,Lampetra tridentata,,", ",M. Lance
Pv12.570,Coloabis saira,,", ",M. Lance
Pv12.570,Coloabis saira,,", ",M. Lance
Pv12.570,Stichaeid spp.,,", ",M. Lance
Pv12.570,Stichaeid spp.,,", ",M. Lance
Pv12.570,Stichaeid spp.,,", ",M. Lance
Pv12.570,Oncorhynchus tshawytscha,Juvenile,", juv",M. Lance
Pv12.570,Oncorhynchus tshawytscha,Juvenile,", juv",M. Lance
Pv12.570,Oncorhynchus tshawytscha,Juvenile,", juv",M. Lance
Pv12.571,Oncorhynchus spp.,Adult,", ad",M. Lance
Pv12.572,Myxinid species,,", ",M. Lance
Pv12.573,Gadid or Merluccid,,", ",M. Lance
Pv12.573,Clupeid spp.,,", ",M. Lance
Pv12.574,Cyclopterid spp.,,", ",M. Lance
Pv12.574,Cyclopterid spp.,,", ",M. Lance
Pv12.574,Cyclopterid spp.,,", ",M. Lance
Pv12.574,Lampetra tridentata,,", ",M. Lance
Pv12.574,Lampetra tridentata,,", ",M. Lance
Pv12.574,Stichaeid spp.,,", ",M. Lance
Pv12.574,Stichaeid spp.,,", ",M. Lance
Pv12.574,Oncorhynchus tshawytscha,Juvenile,", juv",M. Lance
Pv12.574,Oncorhynchus tshawytscha,Juvenile,", juv",M. Lance
Pv12.574,Oncorhynchus tshawytscha,Juvenile,", juv",M. Lance
Pv12.574,Oncorhynchus spp.,Adult,", ad",M. Lance
Pv12.574,Diaphus theta,,", ",M. Lance
Pv12.574,Diaphus theta,,", ",M. Lance
Pv12.574,Diaphus theta,,", ",M. Lance
Pv12.575,Oncorhynchus tshawytscha,Juvenile,", juv",M. Lance
Pv12.575,Citharichthys stigmaeus,,", ",M. Lance
Pv12.576,Unidentified flatfish,,", RF?",M. Lance
Pv12.576,Unidentified flatfish,,", RF?",M. Lance
Pv12.576,Unidentified flatfish,,", ",M. Lance
Pv12.576,Citharichthys stigmaeus,,", ",M. Lance
Pv12.576,Citharichthys stigmaeus,,", ",M. Lance
Pv12.577,Citharichthys stigmaeus,,", ",M. Lance
Pv12.577,Citharichthys stigmaeus,,", ",M. Lance
Pv12.577,Citharichthys stigmaeus,,", ",M. Lance
Pv12.578,Oncorhynchus spp.,Adult,", ad",M. Lance
Pv12.579,Pholid spp.,,", ",M. Lance
Pv12.579,Pholid spp.,,", ",M. Lance
Pv12.579,Pholid spp.,,", ",M. Lance
Pv12.579,Cyclopterid spp.,,", ",M. Lance
Pv12.579,Cyclopterid spp.,,", ",M. Lance
Pv12.579,Lampetra tridentata,,", ",M. Lance
Pv12.579,Lampetra tridentata,,", ",M. Lance
Pv12.579,Lampetra tridentata,,", ",M. Lance
Pv12.580,Cyclopterid spp.,,", ",M. Lance
Pv12.580,Cyclopterid spp.,,", ",M. Lance
Pv12.580,Cyclopterid spp.,,", ",M. Lance
Pv12.581,Oncorhynchus spp.,Adult,", ad",M. Lance
Pv12.582,Oncorhynchus spp.,Adult,", ad",M. Lance
Pv12.582,Stichaeid spp.,,", ",M. Lance
Pv12.583,Thaleichthys pacificus,,", ",M. Lance
Pv12.583,Thaleichthys pacificus,,", ",M. Lance
Pv12.583,Thaleichthys pacificus,,", ",M. Lance
Pv12.584,Oncorhynchus spp.,Adult,", ad",M. Lance
Pv12.584,Oncorhynchus spp.,Adult,", ad",M. Lance
Pv12.584,Zoarcid spp.,,", ",M. Lance
Pv12.584,Citharichthys stigmaeus,,", ",M. Lance
Pv12.584,Citharichthys stigmaeus,,", ",M. Lance
Pv12.584,Citharichthys stigmaeus,,", ",M. Lance
Pv12.585,Cyclopterid spp.,,", ",M. Lance
Pv12.585,Cyclopterid spp.,,", ",M. Lance
Pv12.585,Cyclopterid spp.,,", ",M. Lance
Pv12.586,Citharichthys stigmaeus,,", ",M. Lance
Pv12.586,Citharichthys stigmaeus,,", ",M. Lance
Pv12.586,Citharichthys stigmaeus,,", ",M. Lance
Pv12.586,Thaleichthys pacificus,,", ",M. Lance
Pv12.586,Thaleichthys pacificus,,", ",M. Lance
Pv12.587,Oncorhynchus spp.,Adult,", ad",M. Lance
Pv12.587,Oncorhynchus spp.,Adult,", ad",M. Lance
Pv12.587,Thaleichthys pacificus,,", ",M. Lance
Pv12.587,Thaleichthys pacificus,,", ",M. Lance
Pv12.587,Thaleichthys pacificus,,", ",M. Lance
Pv12.587,Lampetra tridentata,,", ",M. Lance
Pv12.587,Lampetra tridentata,,", ",M. Lance
Pv12.587,Lampetra tridentata,,", ",M. Lance
Pv12.588,Oncorhynchus tshawytscha,Adult,", ad",M. Lance
Pv12.588,Oncorhynchus tshawytscha,Adult,", ad",M. Lance
Pv12.588,Oncorhynchus tshawytscha,Adult,", ad",M. Lance
Pv12.588,Cyclopterid spp.,,", ",M. Lance
Pv12.588,Cyclopterid spp.,,", ",M. Lance
Pv12.589,Citharichthys stigmaeus,,", ",M. Lance
Pv12.589,Citharichthys stigmaeus,,", ",M. Lance
Pv12.589,Citharichthys stigmaeus,,", ",M. Lance
Pv12.589,Cyclopterid spp.,,", ",M. Lance
Pv12.590,Thaleichthys pacificus,,", ",M. Lance
Pv12.590,Thaleichthys pacificus,,", ",M. Lance
Pv12.590,Thaleichthys pacificus,,", ",M. Lance
Pv12.590,Diaphus theta,,", ",M. Lance
Pv12.590,Diaphus theta,,", ",M. Lance
Pv12.591,Oncorhynchus spp.,Adult,", ad",M. Lance
Pv12.592,Citharichthys stigmaeus,,", ",M. Lance
Pv12.592,Citharichthys stigmaeus,,", ",M. Lance
Pv12.592,Citharichthys stigmaeus,,", ",M. Lance
Pv12.593,Citharichthys stigmaeus,,", ",M. Lance
Pv12.593,Citharichthys stigmaeus,,", ",M. Lance
Pv12.593,Citharichthys stigmaeus,,", ",M. Lance
Pv12.594,Cyclopterid spp.,,", ",M. Lance
Pv12.594,Cyclopterid spp.,,", ",M. Lance
Pv12.594,Cyclopterid spp.,,", ",M. Lance
Pv12.594,Citharichthys stigmaeus,,", ",M. Lance
Pv12.594,Citharichthys stigmaeus,,", ",M. Lance
Pv12.594,Coloabis saira,,", ",M. Lance
Pv12.594,Coloabis saira,,", ",M. Lance
Pv12.594,Coloabis saira,,", ",M. Lance
Pv12.596,Thaleichthys pacificus,,", ",M. Lance
Pv12.596,Thaleichthys pacificus,,", ",M. Lance
Pv12.596,Thaleichthys pacificus,,", ",M. Lance
Pv12.597,Oncorhynchus spp.,Adult,", ad",M. Lance
Pv12.598,Citharichthys stigmaeus,,", ",M. Lance
Pv12.598,Citharichthys stigmaeus,,", ",M. Lance
Pv12.598,Citharichthys stigmaeus,,", ",M. Lance
Pv12.598,Citharichthys stigmaeus,,", ",M. Lance
Pv12.599,Citharichthys stigmaeus,,", ",M. Lance
Pv12.599,Citharichthys stigmaeus,,", ",M. Lance
Pv12.600,Oncorhynchus spp.,Adult,", ad",M. Lance
Pv12.601,Citharichthys stigmaeus,,", ",M. Lance
Pv12.601,Citharichthys stigmaeus,,", ",M. Lance
Pv12.601,Citharichthys stigmaeus,,", ",M. Lance
Pv12.602,Cyclopterid spp.,,", ",M. Lance
Pv12.602,Cyclopterid spp.,,", ",M. Lance
Pv12.602,Cyclopterid spp.,,", ",M. Lance
Pv12.602,Citharichthys stigmaeus,,", ",M. Lance
Pv12.602,Citharichthys stigmaeus,,", ",M. Lance
Pv12.602,Citharichthys stigmaeus,,", ",M. Lance
Pv12.602,Stichaeid spp.,,", ",M. Lance
Pv12.602,Stichaeid spp.,,", ",M. Lance
Pv12.602,Coloabis saira,,", ",M. Lance
Pv12.602,Coloabis saira,,", ",M. Lance
Pv12.602,Coloabis saira,,", ",M. Lance
Pv12.603,Lampetra tridentata,,", ",M. Lance
Pv12.603,Lampetra tridentata,,", ",M. Lance
Pv12.603,Lampetra tridentata,,", ",M. Lance
Pv12.604,Citharichthys stigmaeus,,", ",M. Lance
Pv12.605,Citharichthys stigmaeus,,", ",M. Lance
Pv12.605,Citharichthys stigmaeus,,", ",M. Lance
Pv12.605,Citharichthys stigmaeus,,", ",M. Lance
Pv12.606,Citharichthys stigmaeus,,", ",M. Lance
Pv12.606,Citharichthys stigmaeus,,", ",M. Lance
Pv12.606,Citharichthys stigmaeus,,", ",M. Lance
Pv12.607,Coloabis saira,,", ",M. Lance
Pv12.607,Coloabis saira,,", ",M. Lance
Pv12.607,Coloabis saira,,", ",M. Lance
Pv12.607,Oncorhynchus spp.,Adult,", ad",M. Lance
Pv12.607,Thaleichthys pacificus,,", ",M. Lance
Pv12.607,Thaleichthys pacificus,,", ",M. Lance
Pv12.607,Citharichthys stigmaeus,,", ",M. Lance
Pv12.607,Citharichthys stigmaeus,,", ",M. Lance
Pv12.608,Unidentified flatfish,,", ",M. Lance
Pv12.608,Oncorhynchus spp.,Adult,", ad",M. Lance
Pv12.608,Coloabis saira,,", ",M. Lance
Pv12.608,Coloabis saira,,", ",M. Lance
Pv12.609,Thaleichthys pacificus,,", ",M. Lance
Pv12.609,Thaleichthys pacificus,,", ",M. Lance
Pv12.609,Thaleichthys pacificus,,", ",M. Lance
Pv12.610,Citharichthys stigmaeus,,", ",M. Lance
Pv12.611,Citharichthys stigmaeus,,", ",M. Lance
Pv12.611,Citharichthys stigmaeus,,", ",M. Lance
Pv12.611,Citharichthys stigmaeus,,", ",M. Lance
Pv12.611,Cyclopterid spp.,,", ",M. Lance
Pv12.611,Cyclopterid spp.,,", ",M. Lance
Pv12.611,Coloabis saira,,", ",M. Lance
Pv12.611,Coloabis saira,,", ",M. Lance
Pv12.611,Coloabis saira,,", ",M. Lance
Pv12.611,Stichaeid spp.,,", ",M. Lance
Pv12.611,Stichaeid spp.,,", ",M. Lance
Pv12.611,Stichaeid spp.,,", ",M. Lance
Pv12.612,Citharichthys stigmaeus,,", ",M. Lance
Pv12.612,Citharichthys stigmaeus,,", ",M. Lance
Pv12.612,Citharichthys stigmaeus,,", ",M. Lance
Pv12.613,Unidentified flatfish,,", poss eelpout?",M. Lance
Pv12.613,Unidentified flatfish,,", poss eelpout?",M. Lance
Pv12.614,Citharichthys stigmaeus,,", ",M. Lance
Pv12.614,Coloabis saira,,", ",M. Lance
Pv12.614,Coloabis saira,,", ",M. Lance
Pv12.614,Coloabis saira,,", ",M. Lance
Pv12.614,Oncorhynchus spp.,Adult,", ad",M. Lance
Pv12.615,Stichaeid spp.,,", ",M. Lance
Pv12.615,Stichaeid spp.,,", ",M. Lance
Pv12.615,Stichaeid spp.,,", ",M. Lance
Pv12.616,Stichaeid spp.,,", ",M. Lance
Pv12.616,Stichaeid spp.,,", ",M. Lance
Pv12.616,Stichaeid spp.,,", ",M. Lance
Pv12.617,Cyclopterid spp.,,", ",M. Lance
Pv12.617,Cyclopterid spp.,,", ",M. Lance
Pv12.617,Cyclopterid spp.,,", ",M. Lance
Pv12.617,Citharichthys stigmaeus,,", ",M. Lance
Pv12.617,Citharichthys stigmaeus,,", ",M. Lance
Pv12.617,Stichaeid spp.,,", ",M. Lance
Pv12.617,Stichaeid spp.,,", ",M. Lance
Pv12.617,Stichaeid spp.,,", ",M. Lance
Pv12.617,Coloabis saira,,", ",M. Lance
Pv12.617,Coloabis saira,,", ",M. Lance
Pv12.617,Coloabis saira,,", ",M. Lance
Pv12.618,Stichaeid spp.,,", ",M. Lance
Pv12.618,Stichaeid spp.,,", ",M. Lance
Pv12.618,Stichaeid spp.,,", ",M. Lance
Pv12.619,Citharichthys stigmaeus,,", ",M. Lance
Pv12.619,Citharichthys stigmaeus,,", ",M. Lance
Pv12.619,Citharichthys stigmaeus,,", ",M. Lance
Pv12.620,Oncorhynchus spp.,Adult,", ad",M. Lance
Pv12.621,Clupeid spp.,,", ",M. Lance
Pv12.621,Oncorhynchus spp.,Adult,", ad",M. Lance
Pv12.622,Citharichthys stigmaeus,,", ",M. Lance
Pv12.622,Citharichthys stigmaeus,,", ",M. Lance
Pv12.622,Citharichthys stigmaeus,,", ",M. Lance
Pv12.623,Citharichthys stigmaeus,,", ",M. Lance
Pv12.623,Citharichthys stigmaeus,,", ",M. Lance
Pv12.623,Citharichthys stigmaeus,,", ",M. Lance
Pv12.624,Gadid or Merluccid,,", ",M. Lance
Pv12.624,Oncorhynchus spp.,Adult,", ad",M. Lance
Pv12.625,Oncorhynchus spp.,Adult,", ad",M. Lance
Pv12.626,Oncorhynchus spp.,Adult,", ad",M. Lance
Pv12.627,Oncorhynchus spp.,Adult,", ad",M. Lance
Pv12.628,Lampetra tridentata,,", ",M. Lance
Pv12.628,Lampetra tridentata,,", ",M. Lance
Pv12.629,Thaleichthys pacificus,,", ",M. Lance
Pv12.629,Thaleichthys pacificus,,", ",M. Lance
Pv12.629,Coloabis saira,,", ",M. Lance
Pv12.630,Lampetra tridentata,,", ",M. Lance
Pv12.630,Pholid spp.,,", ",M. Lance
Pv12.631,Cyclopterid spp.,,", ",M. Lance
Pv12.631,Cyclopterid spp.,,", ",M. Lance
Pv12.631,Cyclopterid spp.,,", ",M. Lance
Pv12.631,Lampetra tridentata,,", ",M. Lance
Pv12.631,Lampetra tridentata,,", ",M. Lance
Pv12.631,Lampetra tridentata,,", ",M. Lance
Pv12.632,Citharichthys stigmaeus,,", ",M. Lance
Pv12.633,Oncorhynchus spp.,Adult,", ad",M. Lance
Pv12.634,Oncorhynchus spp.,Adult,", ad",M. Lance
Pv12.634,Oncorhynchus tshawytscha,Juvenile,", juv",M. Lance
Pv12.634,Clupeid spp.,,", ",M. Lance
Pv12.634,Cyclopterid spp.,,", ",M. Lance
Pv12.635,Cyclopterid spp.,,", ",M. Lance
Pv12.635,Cyclopterid spp.,,", ",M. Lance
Pv12.635,Cyclopterid spp.,,", ",M. Lance
Pv12.635,Coloabis saira,,", ",M. Lance
Pv12.635,Coloabis saira,,", ",M. Lance
Pv12.635,Coloabis saira,,", ",M. Lance
Pv12.635,Oncorhynchus tshawytscha,Adult,", ad",M. Lance
Pv12.635,Oncorhynchus tshawytscha,Adult,", ad",M. Lance
Pv12.635,Oncorhynchus tshawytscha,Adult,", ad",M. Lance
Pv12.635,Oncorhynchus tshawytscha,Juvenile,", juv",M. Lance
Pv12.635,Oncorhynchus tshawytscha,Juvenile,", juv",M. Lance
Pv12.635,Stichaeid spp.,,", ",M. Lance
Pv12.635,Stichaeid spp.,,", ",M. Lance
Pv12.635,Stichaeid spp.,,", ",M. Lance
Pv12.636,Coloabis saira,,", ",M. Lance
Pv12.636,Oncorhynchus spp.,Adult,", ad",M. Lance
Pv12.637,Cyclopterid spp.,,", ",M. Lance
Pv12.637,Cyclopterid spp.,,", ",M. Lance
Pv12.637,Cyclopterid spp.,,", ",M. Lance
Pv12.638,Cyclopterid spp.,,", ",M. Lance
Pv12.638,Cyclopterid spp.,,", ",M. Lance
Pv12.638,Cyclopterid spp.,,", ",M. Lance
Pv12.638,Clupeid spp.,,", ",M. Lance
Pv12.638,Oncorhynchus spp.,Juvenile,", juv",M. Lance
Pv12.638,Oncorhynchus spp.,Juvenile,", juv",M. Lance
Pv12.638,Pholid spp.,,", ",M. Lance
Pv12.638,Unidentified flatfish,,", ",M. Lance
Pv12.640,Oncorhynchus spp.,Adult,", ad",M. Lance
Pv12.641,Lampetra tridentata,,", ",M. Lance
Pv12.641,Lampetra tridentata,,", ",M. Lance
Pv12.641,Oncorhynchus spp.,Adult,", ad",M. Lance
Pv12.642,Cyclopterid spp.,,", ",M. Lance
Pv12.642,Cyclopterid spp.,,", ",M. Lance
Pv12.642,Lampetra tridentata,,", ",M. Lance
Pv12.642,Lampetra tridentata,,", ",M. Lance
Pv12.642,Lampetra tridentata,,", ",M. Lance
Pv12.642,Oncorhynchus tshawytscha,Juvenile,", juv",M. Lance
Pv12.643,Stichaeid spp.,,", ",M. Lance
Pv12.643,Stichaeid spp.,,", ",M. Lance
Pv12.643,Stichaeid spp.,,", ",M. Lance
Pv12.643,Lampetra tridentata,,", ",M. Lance
Pv12.643,Lampetra tridentata,,", ",M. Lance
Pv12.643,Lampetra tridentata,,", ",M. Lance
Pv12.643,Citharichthys stigmaeus,,", ",M. Lance
Pv12.643,Citharichthys stigmaeus,,", ",M. Lance
Pv12.643,Cyclopterid spp.,,", ",M. Lance
Pv12.643,Cyclopterid spp.,,", ",M. Lance
Pv12.643,Cyclopterid spp.,,", ",M. Lance
Pv12.643,Thaleichthys pacificus,,", ",M. Lance
Pv12.644,Cyclopterid spp.,,", ",M. Lance
Pv12.644,Cyclopterid spp.,,", ",M. Lance
Pv12.644,Lampetra tridentata,,", ",M. Lance
Pv12.645,Stichaeid spp.,,", ",M. Lance
Pv12.645,Stichaeid spp.,,", ",M. Lance
Pv12.645,Stichaeid spp.,,", ",M. Lance
Pv12.645,Coloabis saira,,", ",M. Lance
Pv12.646,Lampetra tridentata,,", ",M. Lance
Pv12.646,Lampetra tridentata,,", ",M. Lance
Pv12.646,Cyclopterid spp.,,", ",M. Lance
Pv12.646,Cyclopterid spp.,,", ",M. Lance
Pv12.647,Lampetra tridentata,,", ",M. Lance
Pv12.647,Lampetra tridentata,,", ",M. Lance
Pv12.647,Lampetra tridentata,,", ",M. Lance
Pv12.647,Unidentified flatfish,,", crab pc",M. Lance
Pv12.648,Oncorhynchus spp.,Adult,", ad",M. Lance
Pv12.648,Citharichthys stigmaeus,,", ",M. Lance
Pv12.648,Citharichthys stigmaeus,,", ",M. Lance
Pv12.648,Citharichthys stigmaeus,,", ",M. Lance
Pv12.648,Citharichthys stigmaeus,,", ",M. Lance
Pv12.649,Cyclopterid spp.,,", ",M. Lance
Pv12.649,Cyclopterid spp.,,", ",M. Lance
Pv12.649,Cyclopterid spp.,,", ",M. Lance
Pv12.649,Lampetra tridentata,,", ",M. Lance
Pv12.649,Lampetra tridentata,,", ",M. Lance
Pv12.649,Lampetra tridentata,,", ",M. Lance
Pv12.650,Oncorhynchus spp.,Adult,", ad",M. Lance
Pv12.650,Stichaeid spp.,,", ",M. Lance
Pv12.650,Stichaeid spp.,,", ",M. Lance
Pv12.650,Cyclopterid spp.,,", ",M. Lance
Pv12.650,Cyclopterid spp.,,", ",M. Lance
Pv12.651,Lampetra tridentata,,", ",M. Lance
Pv12.651,Lampetra tridentata,,", ",M. Lance
Pv12.651,Lampetra tridentata,,", ",M. Lance
Pv12.651,Oncorhynchus spp.,Adult,", ad",M. Lance
Pv12.651,Stichaeid spp.,,", ",M. Lance
Pv12.652,Oncorhynchus spp.,Adult,", ad",M. Lance
Pv12.653,Citharichthys stigmaeus,,", ",M. Lance
Pv12.653,Citharichthys stigmaeus,,", ",M. Lance
Pv12.653,Citharichthys stigmaeus,,", ",M. Lance
Pv12.654,Cyclopterid spp.,,", ",M. Lance
Pv12.654,Cyclopterid spp.,,", ",M. Lance
Pv12.654,Cyclopterid spp.,,", ",M. Lance
Pv12.654,Cyclopterid spp.,,", ",M. Lance
Pv12.654,Citharichthys stigmaeus,,", ",M. Lance
Pv12.654,Citharichthys stigmaeus,,", ",M. Lance
Pv12.654,Citharichthys stigmaeus,,", ",M. Lance
Pv12.654,Oncorhynchus spp.,Adult,", ad",M. Lance
Pv12.654,Diaphus theta,,", ",M. Lance
Pv12.654,Diaphus theta,,", ",M. Lance
Pv12.654,Rhaochilus vacca,,", ",M. Lance
Pv12.654,Rhaochilus vacca,,", ",M. Lance
Pv12.654,Rhaochilus vacca,,", ",M. Lance
Pv12.655,Lampetra tridentata,,", ",M. Lance
Pv12.656,Oncorhynchus spp.,Adult,", ad",M. Lance
Pv12.656,Alosa sapidissima,,", ",M. Lance
Pv12.656,Alosa sapidissima,,", ",M. Lance
Pv12.656,Lampetra tridentata,,", ",M. Lance
Pv12.656,Cyclopterid spp.,,", ",M. Lance
Pv12.656,Cyclopterid spp.,,", ",M. Lance
Pv12.656,Cyclopterid spp.,,", ",M. Lance
Pv12.657,Lampetra tridentata,,", ",M. Lance
Pv12.657,Lampetra tridentata,,", ",M. Lance
Pv12.657,Lampetra tridentata,,", ",M. Lance
Pv12.657,Oncorhynchus spp.,Juvenile,", juv",M. Lance
Pv12.657,Oncorhynchus spp.,Adult,", ad",M. Lance
Pv12.657,Cyclopterid spp.,,", ",M. Lance
Pv12.657,Cyclopterid spp.,,", ",M. Lance
Pv12.657,Cyclopterid spp.,,", ",M. Lance
Pv12.657,Alosa sapidissima,,", ",M. Lance
Pv12.657,Alosa sapidissima,,", ",M. Lance
Pv12.658,Lampetra tridentata,,", ",M. Lance
Pv12.658,Lampetra tridentata,,", ",M. Lance
Pv12.658,Lampetra tridentata,,", ",M. Lance
Pv12.659,Oncorhynchus spp.,Adult,", ad",M. Lance
Pv12.660,Oncorhynchus spp.,Adult,", ad",M. Lance
Pv12.661,Oncorhynchus spp.,Adult,", ad",M. Lance
Pv12.662,Oncorhynchus spp.,Adult,", ad",M. Lance
Pv12.663,Oncorhynchus spp.,Adult,", ad",M. Lance
Pv12.664,Trichodon trichodon,,", crab megalope?",M. Lance
Pv12.664,Oncorhynchus spp.,Adult,", ad",M. Lance
Pv12.665,Oncorhynchus spp.,Adult,", ad",M. Lance
Pv12.666,Oncorhynchus spp.,Adult,", ad",M. Lance
Pv12.667,Oncorhynchus spp.,Adult,", ad",M. Lance
Pv12.668,Oncorhynchus spp.,Adult,", ad",M. Lance
Pv12.669,Oncorhynchus spp.,Adult,", ad",M. Lance
Pv12.669,Oncorhynchus spp.,Adult,", ad",M. Lance
Pv12.670,Oncorhynchus spp.,Adult,", ad",M. Lance
Pv12.671,Oncorhynchus spp.,Adult,", ad",M. Lance
Pv12.672,Oncorhynchus spp.,Adult,", ad",M. Lance
Pv12.673,Oncorhynchus spp.,Adult,", ad",M. Lance
Pv12.674,Oncorhynchus spp.,Adult,", ad",M. Lance
Pv12.675,Oncorhynchus spp.,Adult,", ad",M. Lance
Pv12.676,Oncorhynchus spp.,Adult,", ad",M. Lance
Pv12.677,Oncorhynchus spp.,Adult,", eggs? Ad",M. Lance
Pv12.678,Oncorhynchus spp.,Adult,", ad",M. Lance
Pv12.679,Oncorhynchus spp.,Adult,", ad",M. Lance
Pv12.680,Oncorhynchus spp.,Adult,", ad",M. Lance
Pv12.681,Oncorhynchus spp.,Adult,", ad",M. Lance
Pv12.682,Oncorhynchus spp.,Adult,", eggs? Ad",M. Lance
Pv12.683,Lampetra tridentata,,", ",M. Lance
Pv12.683,Lampetra tridentata,,", ",M. Lance
Pv12.683,Lampetra tridentata,,", ",M. Lance
Pv12.683,Oncorhynchus spp.,Adult,", ad",M. Lance
Pv12.684,Oncorhynchus spp.,Adult,", ad",M. Lance
Pv12.685,Citharichthys stigmaeus,,", ",M. Lance
Pv12.685,Citharichthys stigmaeus,,", ",M. Lance
Pv12.685,Citharichthys stigmaeus,,", ",M. Lance
Pv12.686,Oncorhynchus spp.,Adult,", ad",M. Lance
Pv12.687,Cyclopterid spp.,,", ",M. Lance
Pv12.687,Cyclopterid spp.,,", ",M. Lance
Pv12.687,Cyclopterid spp.,,", ",M. Lance
Pv12.687,Thaleichthys pacificus,,", ",M. Lance
Pv12.687,Thaleichthys pacificus,,", ",M. Lance
Pv12.688,Oncorhynchus spp.,Adult,", ad",M. Lance
Pv12.689,Thaleichthys pacificus,,", ",M. Lance
Pv12.689,Thaleichthys pacificus,,", ",M. Lance
Pv12.689,Thaleichthys pacificus,,", ",M. Lance
Pv12.689,Citharichthys stigmaeus,,", ",M. Lance
Pv12.689,Citharichthys stigmaeus,,", ",M. Lance
Pv12.689,Cyclopterid spp.,,", ",M. Lance
Pv12.689,Cyclopterid spp.,,", ",M. Lance
Pv12.689,Cyclopterid spp.,,", ",M. Lance
Pv12.689,Rhaochilus vacca,,", ",M. Lance
Pv12.689,Rhaochilus vacca,,", ",M. Lance
Pv12.689,Rhaochilus vacca,,", ",M. Lance
Pv12.690,Coloabis saira,,", ",M. Lance
Pv12.690,Coloabis saira,,", ",M. Lance
Pv12.690,Coloabis saira,,", ",M. Lance
Pv12.690,Thaleichthys pacificus,,", ",M. Lance
Pv12.690,Thaleichthys pacificus,,", ",M. Lance
Pv12.690,Thaleichthys pacificus,,", ",M. Lance
Pv12.690,Citharichthys stigmaeus,,", ",M. Lance
Pv12.690,Citharichthys stigmaeus,,", ",M. Lance
Pv12.690,Cyclopterid spp.,,", ",M. Lance
Pv12.690,Cyclopterid spp.,,", ",M. Lance
Pv12.690,Cyclopterid spp.,,", ",M. Lance
Pv12.691,Oncorhynchus spp.,Adult,", ad",M. Lance
Pv12.692,Merluccius productus,,", ",M. Lance
Pv12.694,Myxinid species,,", ",M. Lance
Pv12.695,Oncorhynchus spp.,Adult,", eggs? Ad",M. Lance
Pv12.696,Oncorhynchus spp.,Adult,", ad",M. Lance
Pv12.698,Oncorhynchus spp.,Adult,", ad",M. Lance
Pv12.700,Citharichthys stigmaeus,,", ",M. Lance
Pv12.700,Citharichthys stigmaeus,,", ",M. Lance
Pv12.700,Citharichthys stigmaeus,,", ",M. Lance
Pv12.700,Cyclopterid spp.,,", ",M. Lance
Pv12.701,Oncorhynchus spp.,Adult,", ad",M. Lance
Pv12.702,Oncorhynchus spp.,Adult,", ad",M. Lance
Pv12.703,Cyclopterid spp.,,", ",M. Lance
Pv12.703,Cyclopterid spp.,,", ",M. Lance
Pv12.703,Cyclopterid spp.,,", ",M. Lance
Pv12.704,Merluccius productus,,", ",M. Lance
Pv12.705,Oncorhynchus spp.,,", ",M. Lance
Pv12.706,Oncorhynchus spp.,Adult,", ad",M. Lance
Pv12.706,Lampetra tridentata,,", ",M. Lance
Pv12.706,Lampetra tridentata,,", ",M. Lance
Pv12.706,Citharichthys stigmaeus,,", ",M. Lance
Pv12.706,Citharichthys stigmaeus,,", ",M. Lance
Pv12.707,Thaleichthys pacificus,,", ",M. Lance
Pv12.707,Thaleichthys pacificus,,", ",M. Lance
Pv12.707,Coloabis saira,,", ",M. Lance
Pv12.707,Coloabis saira,,", ",M. Lance
Pv12.707,Lampetra tridentata,,", ",M. Lance
Pv12.707,Lampetra tridentata,,", ",M. Lance
Pv12.707,Oncorhynchus spp.,Adult,", ad",M. Lance
Pv12.707,Citharichthys stigmaeus,,", ",M. Lance
Pv12.707,Citharichthys stigmaeus,,", ",M. Lance
Pv12.707,Citharichthys stigmaeus,,", ",M. Lance
Pv12.707,Cyclopterid spp.,,", ",M. Lance
Pv12.707,Cyclopterid spp.,,", ",M. Lance
Pv12.707,Cyclopterid spp.,,", ",M. Lance
Pv12.708,Oncorhynchus spp.,Adult,", ad",M. Lance
Pv12.709,Oncorhynchus tshawytscha,Juvenile,", juv",M. Lance
Pv12.709,Oncorhynchus tshawytscha,Juvenile,", juv",M. Lance
Pv12.709,Oncorhynchus tshawytscha,Juvenile,", juv",M. Lance
Pv12.709,Oncorhynchus spp.,Adult,", ad",M. Lance
Pv12.710,Oncorhynchus spp.,Adult,", ad",M. Lance
Pv12.711,Oncorhynchus spp.,Adult,", ad",M. Lance
Pv12.712,Oncorhynchus spp.,Adult,", ad",M. Lance
Pv12.713,Oncorhynchus spp.,Adult,", ad",M. Lance
Pv12.714,Oncorhynchus spp.,Adult,", ad",M. Lance
Pv12.715,Oncorhynchus spp.,Adult,", ad",M. Lance
Pv12.716,Oncorhynchus spp.,Adult,", eggs? Ad",M. Lance
Pv12.717,Oncorhynchus spp.,Adult,", ad",M. Lance
Pv13.002,Thaleichthys pacificus,,", ",M. Lance
Pv13.003,Lampetra tridentata,,", ",M. Lance
Pv13.003,Lampetra tridentata,,", ",M. Lance
Pv13.003,Lampetra tridentata,,", ",M. Lance
Pv13.003,Cyclopterid spp.,,", ",M. Lance
Pv13.003,Cyclopterid spp.,,", ",M. Lance
Pv13.003,Osmerid spp.,,", not capelin",M. Lance
Pv13.003,Osmerid spp.,,", not capelin",M. Lance
Pv13.003,Osmerid spp.,,", not capelin",M. Lance
Pv13.003,Mallotus villosus,,", ",M. Lance
Pv13.003,Mallotus villosus,,", ",M. Lance
Pv13.003,Mallotus villosus,,", ",M. Lance
Pv13.003,Clupeid spp.,,", ",M. Lance
Pv13.005,Clupeid spp.,,", ",M. Lance
Pv13.006,Clupeid spp.,,", v eroded, not CLUPAL",M. Lance
Pv13.006,Clupeid spp.,,", striated pc, SARSAG? ALOSAP",M. Lance
Pv13.007,Galiteuthis spp.,,", ",M. Lance
Pv13.007,Osmerid spp.,,", ",M. Lance
Pv13.007,Osmerid spp.,,", ",M. Lance
Pv13.007,Osmerid spp.,,", ",M. Lance
Pv13.008,Galiteuthis spp.,,", ",M. Lance
Pv13.008,Gadid or Merluccid,,", ",M. Lance
Pv13.009,Clupeid spp.,,", ",M. Lance
Pv13.009,Gadid or Merluccid,,", cf THECHA",M. Lance
Pv13.010,Osmerid spp.,,", ",M. Lance
Pv13.010,Osmerid spp.,,", ",M. Lance
Pv13.010,Galiteuthis spp.,,", ",M. Lance
Pv13.011,Osmerid spp.,,", ",M. Lance
Pv13.011,Osmerid spp.,,", ",M. Lance
Pv13.011,Galiteuthis spp.,,", ",M. Lance
Pv13.012,Citharichthys stigmaeus,,", ",M. Lance
Pv13.012,Citharichthys stigmaeus,,", ",M. Lance
Pv13.012,Citharichthys stigmaeus,,", ",M. Lance
Pv13.014,Thaleichthys pacificus,,", ",M. Lance
Pv13.014,Thaleichthys pacificus,,", ",M. Lance
Pv13.015,Galiteuthis spp.,,", ",M. Lance
Pv13.015,Galiteuthis spp.,,", ",M. Lance
Pv13.015,Clupeid spp.,,", ",M. Lance
Pv13.016,Gadid or Merluccid,,", ",M. Lance
Pv13.020,Citharichthys stigmaeus,,", ",M. Lance
Pv13.020,Citharichthys stigmaeus,,", ",M. Lance
Pv13.020,Citharichthys stigmaeus,,", ",M. Lance
Pv13.020,Citharichthys stigmaeus,,", ",M. Lance
Pv13.021,Clupeid spp.,,", ",M. Lance
Pv13.021,Gadid or Merluccid,,", ",M. Lance
Pv13.022,Citharichthys stigmaeus,,", ",M. Lance
Pv13.022,Citharichthys stigmaeus,,", ",M. Lance
Pv13.022,Citharichthys stigmaeus,,", ",M. Lance
Pv13.023,Gadid or Merluccid,,", ",M. Lance
Pv13.024,Citharichthys stigmaeus,,", ",M. Lance
Pv13.024,Citharichthys stigmaeus,,", ",M. Lance
Pv13.025,Oncorhynchus spp.,,", MNIB=1",M. Lance
Pv13.025,Alosa sapidissima,,", ",M. Lance
Pv13.025,Alosa sapidissima,,", ",M. Lance
Pv13.025,Citharichthys stigmaeus,,", ",M. Lance
Pv13.025,Citharichthys stigmaeus,,", ",M. Lance
Pv13.026,Citharichthys stigmaeus,,", ",M. Lance
Pv13.026,Citharichthys stigmaeus,,", ",M. Lance
Pv13.026,Citharichthys stigmaeus,,", ",M. Lance
Pv13.027,Sebastes spp.,,", 2 brkn pcs",M. Lance
Pv13.027,Sebastes spp.,,", ",M. Lance
Pv13.028,Citharichthys stigmaeus,,", ",M. Lance
Pv13.028,Citharichthys stigmaeus,,", ",M. Lance
Pv13.030,Citharichthys stigmaeus,,", ",M. Lance
Pv13.030,Citharichthys stigmaeus,,", ",M. Lance
Pv13.030,Citharichthys stigmaeus,,", ",M. Lance
Pv13.031,Citharichthys stigmaeus,,", ",M. Lance
Pv13.031,Citharichthys stigmaeus,,", ",M. Lance
Pv13.031,Citharichthys stigmaeus,,", ",M. Lance
Pv13.032,Merluccius productus,,", ",M. Lance
Pv13.033,Merluccius productus,,", ",M. Lance
Pv13.034,Oncorhynchus tshawytscha,Juvenile,", Juv; MNIB = 1",M. Lance
Pv13.035,Rajid spp.,,", ",M. Lance
Pv13.035,Clupeid spp.,,", scales",M. Lance
Pv13.035,Alosa sapidissima,,", ",M. Lance
Pv13.036,Oncorhynchus tshawytscha,Juvenile,", juv; 2 vts only, MNIB = 1",M. Lance
Pv13.037,Citharichthys stigmaeus,,", ",M. Lance
Pv13.037,Citharichthys stigmaeus,,", ",M. Lance
Pv13.037,Citharichthys stigmaeus,,", ",M. Lance
Pv13.038,Oncorhynchus tshawytscha,Juvenile,", Juv; MNIB = 1",M. Lance
Pv13.038,Citharichthys stigmaeus,,", ",M. Lance
Pv13.040,Citharichthys stigmaeus,,", ",M. Lance
Pv13.040,Citharichthys stigmaeus,,", ",M. Lance
Pv13.040,Citharichthys stigmaeus,,", ",M. Lance
Pv13.041,Myxinid species,,", 3 bone frags",M. Lance
Pv13.042,Merluccius productus,,", ",M. Lance
Pv13.042,Citharichthys stigmaeus,,", ",M. Lance
Pv13.042,Citharichthys stigmaeus,,", ",M. Lance
Pv13.043,Citharichthys stigmaeus,,", ",M. Lance
Pv13.043,Citharichthys stigmaeus,,", ",M. Lance
Pv13.043,Citharichthys stigmaeus,,", ",M. Lance
Pv13.043,Oncorhynchus tshawytscha,Juvenile,", Juv; 1 vt only; MNIB=1",M. Lance
Pv13.044,Clupeid spp.,,", ",M. Lance
Pv13.044,Oncorhynchus tshawytscha,,", cf ONCKIS",M. Lance
Pv13.044,Oncorhynchus tshawytscha,Juvenile,", JUV, MNIB=1",M. Lance
Pv13.045,Merluccius productus,,", v eroded",M. Lance
Pv13.045,Merluccius productus,,", v eroded",M. Lance
Pv13.045,Merluccius productus,,", ",M. Lance
Pv13.046,Citharichthys stigmaeus,,", ",M. Lance
Pv13.046,Citharichthys stigmaeus,,", ",M. Lance
Pv13.047,Merluccius productus,,", ",M. Lance
Pv13.047,Merluccius productus,,", ",M. Lance
Pv13.047,Merluccius productus,,", ",M. Lance
Pv13.047,Citharichthys stigmaeus,,", ",M. Lance
Pv13.047,Citharichthys stigmaeus,,", ",M. Lance
Pv13.048,Clupeid spp.,,", ",M. Lance
Pv13.048,Cyclopterid spp.,,", ",M. Lance
Pv13.049,Citharichthys stigmaeus,,", ",M. Lance
Pv13.049,Citharichthys stigmaeus,,", ",M. Lance
Pv13.049,Citharichthys stigmaeus,,", ",M. Lance
Pv13.051,Cyclopterid spp.,,", ",M. Lance
Pv13.051,Cyclopterid spp.,,", ",M. Lance
Pv13.051,Cyclopterid spp.,,", ",M. Lance
Pv13.052,Citharichthys stigmaeus,,", ",M. Lance
Pv13.053,Citharichthys stigmaeus,,", ",M. Lance
Pv13.054,Lampetra tridentata,,", ",M. Lance
Pv13.054,Lampetra tridentata,,", ",M. Lance
Pv13.054,Lampetra tridentata,,", ",M. Lance
Pv13.054,Merluccius productus,,", ",M. Lance
Pv13.054,Merluccius productus,,", ",M. Lance
Pv13.054,Citharichthys stigmaeus,,", ",M. Lance
Pv13.054,Diaphus theta,,", ",M. Lance
Pv13.054,Diaphus theta,,", ",M. Lance
Pv13.054,Unidentified flatfish,,", 3 nereid worm pincers",M. Lance
Pv13.055,Citharichthys stigmaeus,,", ",M. Lance
Pv13.056,Gadid or Merluccid,,", ",M. Lance
Pv13.056,Platichthys stellatus,,", ",M. Lance
Pv13.057,Clupeid spp.,,", ",M. Lance
Pv13.058,Cyclopterid spp.,,", ",M. Lance
Pv13.058,Cyclopterid spp.,,", ",M. Lance
Pv13.058,Cyclopterid spp.,,", ",M. Lance
Pv13.058,Citharichthys stigmaeus,,", ",M. Lance
Pv13.058,Citharichthys stigmaeus,,", ",M. Lance
Pv13.058,Citharichthys stigmaeus,,", ",M. Lance
Pv13.065,Alosa sapidissima,,", ",M. Lance
Pv13.065,Alosa sapidissima,,", ",M. Lance
Pv13.065,Alosa sapidissima,,", ",M. Lance
Pv13.065,Citharichthys stigmaeus,,", ",M. Lance
Pv13.065,Citharichthys stigmaeus,,", ",M. Lance
Pv13.065,Cyclopterid spp.,,", ",M. Lance
Pv13.068,Citharichthys stigmaeus,,", ",M. Lance
Pv13.068,Citharichthys stigmaeus,,", ",M. Lance
Pv13.068,Citharichthys stigmaeus,,", ",M. Lance
Pv13.068,Citharichthys stigmaeus,,", ",M. Lance
Pv13.069,Stichaeid spp.,,", ",M. Lance
Pv13.069,Stichaeid spp.,,", ",M. Lance
Pv13.069,Stichaeid spp.,,", ",M. Lance
Pv13.069,Cyclopterid spp.,,", ",M. Lance
Pv13.069,Cyclopterid spp.,,", ",M. Lance
Pv13.070,Citharichthys stigmaeus,,", ",M. Lance
Pv13.070,Citharichthys stigmaeus,,", ",M. Lance
Pv13.070,Citharichthys stigmaeus,,", ",M. Lance
Pv13.070,Citharichthys stigmaeus,,", ",M. Lance
Pv13.074,Citharichthys stigmaeus,,", ",M. Lance
Pv13.074,Citharichthys stigmaeus,,", ",M. Lance
Pv13.075,Oncorhynchus spp.,Adult,", cf Adult",M. Lance
Pv13.075,Osmerid spp.,,", cf",M. Lance
Pv13.075,Cyclopterid spp.,,", ",M. Lance
Pv13.076,Mallotus villosus,,", ",M. Lance
Pv13.076,Mallotus villosus,,", ",M. Lance
Pv13.076,Mallotus villosus,,", ",M. Lance
Pv13.076,Galiteuthis spp.,,", ",M. Lance
Pv13.077,Osmerid spp.,,", ",M. Lance
Pv13.077,Galiteuthis spp.,,", ",M. Lance
Pv13.078,Osmerid spp.,,", ",M. Lance
Pv13.079,Mallotus villosus,,", ",M. Lance
Pv13.079,Mallotus villosus,,", ",M. Lance
Pv13.079,Galiteuthis spp.,,", ",M. Lance
Pv13.080,Galiteuthis spp.,,", ",M. Lance
Pv13.080,Osmerid spp.,,", ",M. Lance
Pv13.080,Platichthys stellatus,,", ",M. Lance
Pv13.081,Osmerid spp.,,", ",M. Lance
Pv13.081,Galiteuthis spp.,,", ",M. Lance
Pv13.083,Galiteuthis spp.,,", ",M. Lance
Pv13.083,Osmerid spp.,,", ",M. Lance
Pv13.084,Mallotus villosus,,", ",M. Lance
Pv13.084,Mallotus villosus,,", ",M. Lance
Pv13.084,Mallotus villosus,,", ",M. Lance
Pv13.084,Galiteuthis spp.,,", ",M. Lance
Pv13.085,Galiteuthis spp.,,", ",M. Lance
Pv13.086,Galiteuthis spp.,,", ",M. Lance
Pv13.086,Osmerid spp.,,", ",M. Lance
Pv13.088,Galiteuthis spp.,,", ",M. Lance
Pv13.088,Osmerid spp.,,", ",M. Lance
Pv13.089,Galiteuthis spp.,,", ",M. Lance
Pv13.090,Galiteuthis spp.,,", ",M. Lance
Pv13.090,Osmerid spp.,,", ",M. Lance
Pv13.091,Mallotus villosus,,", ",M. Lance
Pv13.091,Mallotus villosus,,", ",M. Lance
Pv13.091,Mallotus villosus,,", ",M. Lance
Pv13.091,Galiteuthis spp.,,", ",M. Lance
Pv13.092,Galiteuthis spp.,,", ",M. Lance
Pv13.092,Osmerid spp.,,", ",M. Lance
Pv13.093,Mallotus villosus,,", ",M. Lance
Pv13.093,Mallotus villosus,,", ",M. Lance
Pv13.093,Galiteuthis spp.,,", ",M. Lance
Pv13.094,Mallotus villosus,,", ",M. Lance
Pv13.094,Mallotus villosus,,", ",M. Lance
Pv13.094,Mallotus villosus,,", ",M. Lance
Pv13.094,Oncorhynchus spp.,,", MNIB=1",M. Lance
Pv13.095,Mallotus villosus,,", ",M. Lance
Pv13.095,Mallotus villosus,,", ",M. Lance
Pv13.095,Mallotus villosus,,", ",M. Lance
Pv13.095,Alosa sapidissima,,", ",M. Lance
Pv13.095,Alosa sapidissima,,", ",M. Lance
Pv13.095,Alosa sapidissima,,", ",M. Lance
Pv13.095,Pholid spp.,,", ",M. Lance
Pv13.095,Pholid spp.,,", ",M. Lance
Pv13.097,Cyclopterid spp.,,", ",M. Lance
Pv13.097,Cyclopterid spp.,,", ",M. Lance
Pv13.097,Cyclopterid spp.,,", ",M. Lance
Pv13.097,Galiteuthis spp.,,", ",M. Lance
Pv13.097,Myxinid species,,", ",M. Lance
Pv13.100,Clupeid spp.,,", ",M. Lance
Pv13.100,Gadid or Merluccid,,", ",M. Lance
Pv13.101,Citharichthys stigmaeus,,", ",M. Lance
Pv13.101,Citharichthys stigmaeus,,", ",M. Lance
Pv13.105,Thaleichthys pacificus,,", ",M. Lance
Pv13.105,Thaleichthys pacificus,,", ",M. Lance
Pv13.105,Thaleichthys pacificus,,", ",M. Lance
Pv13.105,Citharichthys stigmaeus,,", ",M. Lance
Pv13.105,Citharichthys stigmaeus,,", ",M. Lance
Pv13.105,Citharichthys stigmaeus,,", ",M. Lance
Pv13.106,Thaleichthys pacificus,,", ",M. Lance
Pv13.106,Thaleichthys pacificus,,", ",M. Lance
Pv13.106,Clupeid spp.,,", ",M. Lance
Pv13.107,Oncorhynchus tshawytscha,Juvenile,", MNIB=1; JUV",M. Lance
Pv13.107,Citharichthys stigmaeus,,", ",M. Lance
Pv13.107,Citharichthys stigmaeus,,", ",M. Lance
Pv13.107,Citharichthys stigmaeus,,", ",M. Lance
Pv13.107,Thaleichthys pacificus,,", ",M. Lance
Pv13.107,Thaleichthys pacificus,,", ",M. Lance
Pv13.108,Citharichthys stigmaeus,,", ",M. Lance
Pv13.108,Citharichthys stigmaeus,,", ",M. Lance
Pv13.108,Citharichthys stigmaeus,,", ",M. Lance
Pv13.109,Citharichthys stigmaeus,,", ",M. Lance
Pv13.109,Citharichthys stigmaeus,,", ",M. Lance
Pv13.109,Citharichthys stigmaeus,,", ",M. Lance
Pv13.109,Citharichthys stigmaeus,,", ",M. Lance
Pv13.112,Citharichthys stigmaeus,,", ",M. Lance
Pv13.112,Citharichthys stigmaeus,,", ",M. Lance
Pv13.112,Citharichthys stigmaeus,,", ",M. Lance
Pv13.112,Cyclopterid spp.,,", ",M. Lance
Pv13.112,Cyclopterid spp.,,", ",M. Lance
Pv13.112,Unidentified flatfish,,", ",M. Lance
Pv13.113,Myxinid species,,", BITS/PCS",M. Lance
Pv13.115,Citharichthys stigmaeus,,", ",M. Lance
Pv13.115,Citharichthys stigmaeus,,", ",M. Lance
Pv13.115,Citharichthys stigmaeus,,", ",M. Lance
Pv13.116,Thaleichthys pacificus,,", ",M. Lance
Pv13.116,Thaleichthys pacificus,,", ",M. Lance
Pv13.116,Thaleichthys pacificus,,", ",M. Lance
Pv13.116,Cyclopterid spp.,,", ",M. Lance
Pv13.116,Cyclopterid spp.,,", ",M. Lance
Pv13.116,Cyclopterid spp.,,", ",M. Lance
Pv13.116,Citharichthys stigmaeus,,", ",M. Lance
Pv13.116,Citharichthys stigmaeus,,", ",M. Lance
Pv13.116,Citharichthys stigmaeus,,", ",M. Lance
Pv13.116,Lampetra tridentata,,", ",M. Lance
Pv13.116,Lampetra tridentata,,", ",M. Lance
Pv13.116,Lampetra tridentata,,", ",M. Lance
Pv13.116,Lampetra tridentata,,", ",M. Lance
Pv13.116,Platichthys stellatus,,", 10 LG, 15 SM",M. Lance
Pv13.116,Platichthys stellatus,,", 5 LG, 16 SM",M. Lance
Pv13.116,Platichthys stellatus,,", ",M. Lance
Pv13.117,Citharichthys stigmaeus,,", ",M. Lance
Pv13.118,Alosa sapidissima,,", ",M. Lance
Pv13.118,Alosa sapidissima,,", ",M. Lance
Pv13.118,Alosa sapidissima,,", ",M. Lance
Pv13.118,Citharichthys stigmaeus,,", ",M. Lance
Pv13.118,Citharichthys stigmaeus,,", ",M. Lance
Pv13.118,Citharichthys stigmaeus,,", ",M. Lance
Pv13.120,Platichthys stellatus,,", ",M. Lance
Pv13.120,Platichthys stellatus,,", cf Eng Sole",M. Lance
Pv13.120,Platichthys stellatus,,", cf Eng Sole",M. Lance
Pv13.120,Platichthys stellatus,,", ",M. Lance
Pv13.122,Citharichthys stigmaeus,,", ",M. Lance
Pv13.122,Citharichthys stigmaeus,,", ",M. Lance
Pv13.122,Citharichthys stigmaeus,,", ",M. Lance
Pv13.123,Citharichthys stigmaeus,,", ",M. Lance
Pv13.123,Citharichthys stigmaeus,,", ",M. Lance
Pv13.124,Citharichthys stigmaeus,,", ",M. Lance
Pv13.124,Citharichthys stigmaeus,,", ",M. Lance
Pv13.124,Citharichthys stigmaeus,,", ",M. Lance
Pv13.125,Citharichthys stigmaeus,,", ",M. Lance
Pv13.125,Citharichthys stigmaeus,,", ",M. Lance
Pv13.125,Citharichthys stigmaeus,,", ",M. Lance
Pv13.126,Merluccius productus,,", ",M. Lance
Pv13.126,Merluccius productus,,", ",M. Lance
Pv13.126,Merluccius productus,,", ",M. Lance
Pv13.126,Merluccius productus,,", ",M. Lance
Pv13.127,Citharichthys stigmaeus,,", ",M. Lance
Pv13.127,Citharichthys stigmaeus,,", ",M. Lance
Pv13.127,Citharichthys stigmaeus,,", ",M. Lance
Pv13.127,Diaphus theta,,", ",M. Lance
Pv13.127,Diaphus theta,,", ",M. Lance
Pv13.127,Diaphus theta,,", pens",M. Lance
Pv13.128,Citharichthys stigmaeus,,", ",M. Lance
Pv13.128,Citharichthys stigmaeus,,", ",M. Lance
Pv13.128,Citharichthys stigmaeus,,", ",M. Lance
Pv13.128,Osmerid spp.,,", ",M. Lance
Pv13.128,Osmerid spp.,,", ",M. Lance
Pv13.129,Galiteuthis spp.,,", ",M. Lance
Pv13.130,Citharichthys stigmaeus,,", ",M. Lance
Pv13.130,Citharichthys stigmaeus,,", ",M. Lance
Pv13.130,Citharichthys stigmaeus,,", ",M. Lance
Pv13.130,Mallotus villosus,,", ",M. Lance
Pv13.130,Mallotus villosus,,", ",M. Lance
Pv13.131,Galiteuthis spp.,,", ",M. Lance
Pv13.131,Hypomesus pretiosus,,", WW",M. Lance
Pv13.131,Hypomesus pretiosus,,", WW",M. Lance
Pv13.131,Hypomesus pretiosus,,", ",M. Lance
Pv13.132,Citharichthys stigmaeus,,", ",M. Lance
Pv13.132,Citharichthys stigmaeus,,", ",M. Lance
Pv13.132,Citharichthys stigmaeus,,", ",M. Lance
Pv13.132,Alosa sapidissima,,", ",M. Lance
Pv13.132,Alosa sapidissima,,", ",M. Lance
Pv13.132,Galiteuthis spp.,,", ",M. Lance
Pv13.133,Porichthys notatus,,", ",M. Lance
Pv13.133,Porichthys notatus,,", ",M. Lance
Pv13.133,Porichthys notatus,,", ",M. Lance
Pv13.133,Zoarcid spp.,,", ",M. Lance
Pv13.133,Zoarcid spp.,,", ",M. Lance
Pv13.133,Zoarcid spp.,,", ",M. Lance
Pv13.133,Osmerid spp.,,", ",M. Lance
Pv13.133,Osmerid spp.,,", ",M. Lance
Pv13.133,Osmerid spp.,,", ",M. Lance
Pv13.134,Platichthys stellatus,,", ",M. Lance
Pv13.135,Citharichthys stigmaeus,,", ",M. Lance
Pv13.135,Citharichthys stigmaeus,,", ",M. Lance
Pv13.135,Citharichthys stigmaeus,,", ",M. Lance
Pv13.135,Osmerid spp.,,", ",M. Lance
Pv13.135,Alosa sapidissima,,", ",M. Lance
Pv13.135,Alosa sapidissima,,", ",M. Lance
Pv13.135,Alosa sapidissima,,", ",M. Lance
Pv13.135,Gadid or Merluccid,,", ",M. Lance
Pv13.136,Unidentified flatfish,,", ",M. Lance
Pv13.136,Citharichthys stigmaeus,,", ",M. Lance
Pv13.136,Citharichthys stigmaeus,,", ",M. Lance
Pv13.136,Citharichthys stigmaeus,,", ",M. Lance
Pv13.136,Gadid or Merluccid,,", ",M. Lance
Pv13.136,Osmerid spp.,,", ",M. Lance
Pv13.136,Leuresthes tenuis,,", Northern smoothtongue",M. Lance
Pv13.136,Leuresthes tenuis,,", Northern smoothtongue",M. Lance
Pv13.136,Leuresthes tenuis,,", ",M. Lance
Pv13.137,Citharichthys stigmaeus,,", ",M. Lance
Pv13.138,Leuresthes tenuis,,", ",M. Lance
Pv13.138,Merluccius productus,,", ",M. Lance
Pv13.138,Merluccius productus,,", ",M. Lance
Pv13.138,Merluccius productus,,", ",M. Lance
Pv13.138,Platichthys stellatus,,", ",M. Lance
Pv13.139,Merluccius productus,,", ",M. Lance
Pv13.139,Merluccius productus,,", ",M. Lance
Pv13.139,Citharichthys stigmaeus,,", ",M. Lance
Pv13.139,Citharichthys stigmaeus,,", ",M. Lance
Pv13.139,Citharichthys stigmaeus,,", ",M. Lance
Pv13.139,Citharichthys stigmaeus,,", ",M. Lance
Pv13.139,Osmerid spp.,,", ",M. Lance
Pv13.140,Citharichthys stigmaeus,,", ",M. Lance
Pv13.140,Citharichthys stigmaeus,,", ",M. Lance
Pv13.140,Citharichthys stigmaeus,,", ",M. Lance
Pv13.141,Mallotus villosus,,", ",M. Lance
Pv13.141,Galiteuthis spp.,,", ",M. Lance
Pv13.141,Labrid spp.,,", ",M. Lance
Pv13.142,Galiteuthis spp.,,", ",M. Lance
Pv13.142,Clupeid spp.,,", ",M. Lance
Pv13.143,Rajid spp.,,", ",M. Lance
Pv13.144,Citharichthys stigmaeus,,", ",M. Lance
Pv13.144,Citharichthys stigmaeus,,", ",M. Lance
Pv13.144,Citharichthys stigmaeus,,", ",M. Lance
Pv13.145,Leuresthes tenuis,,", ",M. Lance
Pv13.145,Gadid or Merluccid,,", ",M. Lance
Pv13.145,Osmerid spp.,,", ",M. Lance
Pv13.146,Rajid spp.,,", ",M. Lance
Pv13.147,Galiteuthis spp.,,", ",M. Lance
Pv13.147,Labrid spp.,,", ",M. Lance
Pv13.147,Osmerid spp.,,", ",M. Lance
Pv13.148,Galiteuthis spp.,,", ",M. Lance
Pv13.148,Mallotus villosus,,", ",M. Lance
Pv13.148,Mallotus villosus,,", ",M. Lance
Pv13.149,Galiteuthis spp.,,", ",M. Lance
Pv13.150,Mallotus villosus,,", ",M. Lance
Pv13.150,Mallotus villosus,,", ",M. Lance
Pv13.150,Mallotus villosus,,", ",M. Lance
Pv13.150,Mallotus villosus,,", ",M. Lance
Pv13.150,Galiteuthis spp.,,", ",M. Lance
Pv13.150,Labrid spp.,,", ",M. Lance
Pv13.150,Citharichthys stigmaeus,,", ",M. Lance
Pv13.150,Citharichthys stigmaeus,,", ",M. Lance
Pv13.151,Citharichthys stigmaeus,,", ",M. Lance
Pv13.151,Myxinid species,,", 5 LG PCS NOT CLUPAL",M. Lance
Pv13.152,Galiteuthis spp.,,", ",M. Lance
Pv13.153,Galiteuthis spp.,,", ",M. Lance
Pv13.153,Mallotus villosus,,", ",M. Lance
Pv13.153,Mallotus villosus,,", ",M. Lance
Pv13.154,Citharichthys stigmaeus,,", ",M. Lance
Pv13.154,Citharichthys stigmaeus,,", ",M. Lance
Pv13.154,Thaleichthys pacificus,,", ",M. Lance
Pv13.154,Thaleichthys pacificus,,", ",M. Lance
Pv13.155,Citharichthys stigmaeus,,", ",M. Lance
Pv13.156,Citharichthys stigmaeus,,", ",M. Lance
Pv13.156,Citharichthys stigmaeus,,", ",M. Lance
Pv13.156,Citharichthys stigmaeus,,", ",M. Lance
Pv13.157,Platichthys stellatus,,", cf ENG SOLE",M. Lance
Pv13.157,Platichthys stellatus,,", cf ENG SOLE",M. Lance
Pv13.157,Platichthys stellatus,,", ",M. Lance
Pv13.158,Thaleichthys pacificus,,", ",M. Lance
Pv13.159,Clupeid spp.,,", ",M. Lance
Pv13.160,Oncorhynchus spp.,Adult,", AD",M. Lance
Pv13.160,Unidentified flatfish,,", insect - nereid worm pincer",M. Lance
Pv13.161,Citharichthys stigmaeus,,", ",M. Lance
Pv13.161,Citharichthys stigmaeus,,", ",M. Lance
Pv13.161,Citharichthys stigmaeus,,", ",M. Lance
Pv13.162,Platichthys stellatus,,", CF ENG SOLE",M. Lance
Pv13.162,Platichthys stellatus,,", CF ENG SOLE",M. Lance
Pv13.162,Platichthys stellatus,,", ",M. Lance
Pv13.163,Citharichthys stigmaeus,,", ",M. Lance
Pv13.163,Citharichthys stigmaeus,,", ",M. Lance
Pv13.164,Citharichthys stigmaeus,,", ",M. Lance
Pv13.164,Citharichthys stigmaeus,,", ",M. Lance
Pv13.165,Merluccius productus,,", ",M. Lance
Pv13.168,Clupeid spp.,,", ",M. Lance
Pv13.168,Merluccius productus,,", ",M. Lance
Pv13.169,Citharichthys stigmaeus,,", ",M. Lance
Pv13.169,Citharichthys stigmaeus,,", ",M. Lance
Pv13.169,Citharichthys stigmaeus,,", ",M. Lance
Pv13.170,Platichthys stellatus,,", CF STARRY",M. Lance
Pv13.170,Platichthys stellatus,,", CF STARRY",M. Lance
Pv13.170,Platichthys stellatus,,", ",M. Lance
Pv13.172,Platichthys stellatus,,", CF STARRY",M. Lance
Pv13.172,Platichthys stellatus,,", ",M. Lance
Pv13.173,Citharichthys stigmaeus,,", ",M. Lance
Pv13.173,Citharichthys stigmaeus,,", ",M. Lance
Pv13.174,Clupeid spp.,,", ",M. Lance
Pv13.175,Citharichthys stigmaeus,,", ",M. Lance
Pv13.175,Citharichthys stigmaeus,,", ",M. Lance
Pv13.175,Citharichthys stigmaeus,,", ",M. Lance
Pv13.176,Porichthys notatus,,", ",M. Lance
Pv13.176,Porichthys notatus,,", ",M. Lance
Pv13.176,Porichthys notatus,,", ",M. Lance
Pv13.177,Cyclopterid spp.,,", ",M. Lance
Pv13.177,Cyclopterid spp.,,", ",M. Lance
Pv13.177,Cyclopterid spp.,,", ",M. Lance
Pv13.178,Gadid or Merluccid,,", ",M. Lance
Pv13.179,Pholid spp.,,", ",M. Lance
Pv13.180,Merluccius productus,,", ",M. Lance
Pv13.180,Merluccius productus,,", ",M. Lance
Pv13.180,Merluccius productus,,", ",M. Lance
Pv13.181,Citharichthys stigmaeus,,", ",M. Lance
Pv13.181,Citharichthys stigmaeus,,", ",M. Lance
Pv13.181,Citharichthys stigmaeus,,", ",M. Lance
Pv13.182,Galiteuthis spp.,,", ",M. Lance
Pv13.182,Citharichthys stigmaeus,,", ",M. Lance
Pv13.182,Citharichthys stigmaeus,,", ",M. Lance
Pv13.182,Citharichthys stigmaeus,,", ",M. Lance
Pv13.183,Platichthys stellatus,,", ",M. Lance
Pv13.184,Platichthys stellatus,,", ",M. Lance
Pv13.185,Pholid spp.,,", MANY scutes!",M. Lance
Pv13.186,Citharichthys stigmaeus,,", ",M. Lance
Pv13.186,Citharichthys stigmaeus,,", ",M. Lance
Pv13.186,Citharichthys stigmaeus,,", ",M. Lance
Pv13.187,Citharichthys stigmaeus,,", ",M. Lance
Pv13.187,Citharichthys stigmaeus,,", ",M. Lance
Pv13.187,Citharichthys stigmaeus,,", ",M. Lance
Pv13.187,Pholid spp.,,", ",M. Lance
Pv13.187,Pholid spp.,,", ",M. Lance
Pv13.187,Pholid spp.,,", ",M. Lance
Pv13.187,Platichthys stellatus,,", LG; CF ENGLISH",M. Lance
Pv13.187,Platichthys stellatus,,", ",M. Lance
Pv13.187,Stichaeid spp.,,", ",M. Lance
Pv13.187,Stichaeid spp.,,", ",M. Lance
Pv13.188,Diaphus theta,,", WW",M. Lance
Pv13.188,Diaphus theta,,", ",M. Lance
Pv13.188,Citharichthys stigmaeus,,", ",M. Lance
Pv13.189,Gadid or Merluccid,,", ",M. Lance
Pv13.189,Clupeid spp.,,", ",M. Lance
Pv13.190,Thaleichthys pacificus,,", ",M. Lance
Pv13.190,Thaleichthys pacificus,,", ",M. Lance
Pv13.190,Thaleichthys pacificus,,", ",M. Lance
Pv13.190,Citharichthys stigmaeus,,", ",M. Lance
Pv13.190,Citharichthys stigmaeus,,", ",M. Lance
Pv13.190,Citharichthys stigmaeus,,", ",M. Lance
Pv13.191,Galiteuthis spp.,,", ",M. Lance
Pv13.191,Citharichthys stigmaeus,,", ",M. Lance
Pv13.191,Citharichthys stigmaeus,,", ",M. Lance
Pv13.191,Labrid spp.,,", ",M. Lance
Pv13.191,Platichthys stellatus,,", ",M. Lance
Pv13.192,Galiteuthis spp.,,", ",M. Lance
Pv13.192,Stichaeid spp.,,", ",M. Lance
Pv13.192,Stichaeid spp.,,", ",M. Lance
Pv13.192,Stichaeid spp.,,", ",M. Lance
Pv13.192,Citharichthys stigmaeus,,", ",M. Lance
Pv13.192,Citharichthys stigmaeus,,", ",M. Lance
Pv13.192,Citharichthys stigmaeus,,", ",M. Lance
Pv13.193,Citharichthys stigmaeus,,", ",M. Lance
Pv13.193,Citharichthys stigmaeus,,", ",M. Lance
Pv13.193,Citharichthys stigmaeus,,", ",M. Lance
Pv13.193,Labrid spp.,,", ",M. Lance
Pv13.193,Gadid or Merluccid,,", ",M. Lance
Pv13.195,Diaphus theta,,", ",M. Lance
Pv13.195,Diaphus theta,,", ",M. Lance
Pv13.195,Leuresthes tenuis,,", ",M. Lance
Pv13.195,Leuresthes tenuis,,", ",M. Lance
Pv13.195,Leuresthes tenuis,,", ",M. Lance
Pv13.195,Merluccius productus,,", ",M. Lance
Pv13.195,Merluccius productus,,", ",M. Lance
Pv13.195,Merluccius productus,,", ",M. Lance
Pv13.195,Galiteuthis spp.,,", ",M. Lance
Pv13.196,Galiteuthis spp.,,", ",M. Lance
Pv13.196,Clupeid spp.,,", ",M. Lance
Pv13.196,Platichthys stellatus,,", ",M. Lance
Pv13.196,Stichaeid spp.,,", cf",M. Lance
Pv13.197,Citharichthys stigmaeus,,", ",M. Lance
Pv13.197,Citharichthys stigmaeus,,", ",M. Lance
Pv13.198,Citharichthys stigmaeus,,", ",M. Lance
Pv13.198,Citharichthys stigmaeus,,", ",M. Lance
Pv13.198,Citharichthys stigmaeus,,", ",M. Lance
Pv13.199,Unidentified flatfish,,", shrimp",M. Lance
Pv13.199,Galiteuthis spp.,,", ",M. Lance
Pv13.200,Merluccius productus,,", ",M. Lance
Pv13.200,Merluccius productus,,", ",M. Lance
Pv13.201,Lampetra tridentata,,", ",M. Lance
Pv13.201,Lampetra tridentata,,", ",M. Lance
Pv13.201,Lampetra tridentata,,", ",M. Lance
Pv13.202,Thaleichthys pacificus,,", ",M. Lance
Pv13.202,Thaleichthys pacificus,,", ",M. Lance
Pv13.202,Citharichthys stigmaeus,,", ",M. Lance
Pv13.202,Citharichthys stigmaeus,,", ",M. Lance
Pv13.203,Platichthys stellatus,,", ",M. Lance
Pv13.203,Platichthys stellatus,,", ",M. Lance
Pv13.203,Platichthys stellatus,,", ",M. Lance
Pv13.203,Stichaeid spp.,,", ",M. Lance
Pv13.203,Stichaeid spp.,,", ",M. Lance
Pv13.203,Stichaeid spp.,,", ",M. Lance
Pv13.204,Merluccius productus,,", ",M. Lance
Pv13.204,Merluccius productus,,", ",M. Lance
Pv13.205,Stichaeid spp.,,", ",M. Lance
Pv13.205,Stichaeid spp.,,", ",M. Lance
Pv13.205,Stichaeid spp.,,", ",M. Lance
Pv13.205,Clupeid spp.,,", ",M. Lance
Pv13.206,Citharichthys stigmaeus,,", ",M. Lance
Pv13.206,Citharichthys stigmaeus,,", ",M. Lance
Pv13.206,Citharichthys stigmaeus,,", ",M. Lance
Pv13.206,Citharichthys stigmaeus,,", ",M. Lance
Pv13.207,Diaphus theta,,", WW",M. Lance
Pv13.207,Diaphus theta,,", WW",M. Lance
Pv13.207,Galiteuthis spp.,,", ",M. Lance
Pv13.207,Alosa sapidissima,,", ",M. Lance
Pv13.207,Alosa sapidissima,,", ",M. Lance
Pv13.207,Alosa sapidissima,,", ",M. Lance
Pv13.209,Alosa sapidissima,,", ",M. Lance
Pv13.209,Alosa sapidissima,,", ",M. Lance
Pv13.209,Alosa sapidissima,,", ",M. Lance
Pv13.211,Porichthys notatus,,", ",M. Lance
Pv13.212,Citharichthys stigmaeus,,", ",M. Lance
Pv13.212,Citharichthys stigmaeus,,", ",M. Lance
Pv13.212,Citharichthys stigmaeus,,", ",M. Lance
Pv13.213,Oncorhynchus tshawytscha,,", bone # for all spp combined",M. Lance
Pv13.213,Oncorhynchus tshawytscha,Juvenile,", all smolt",M. Lance
Pv13.213,Oncorhynchus tshawytscha,Juvenile,", all smolt",M. Lance
Pv13.213,Ommasteuthid spp.,,", all smolt",M. Lance
Pv13.213,Ommasteuthid spp.,,", all smolt",M. Lance
Pv13.213,Ommasteuthid spp.,,", cf",M. Lance
Pv13.213,Ommasteuthid spp.,,", cf",M. Lance
Pv13.213,Clupeid spp.,,", ",M. Lance
Pv13.213,Alosa sapidissima,,", ",M. Lance
Pv13.213,Unidentified flatfish,,", unid, v eroded",M. Lance
Pv13.213,Oncorhynchus tshawytscha,,", ",M. Lance
Pv13.213,Oncorhynchus tshawytscha,,", ",M. Lance
Pv13.213,Oncorhynchus tshawytscha,,", ",M. Lance
Pv13.214,Citharichthys stigmaeus,,", ",M. Lance
Pv13.214,Citharichthys stigmaeus,,", ",M. Lance
Pv13.214,Citharichthys stigmaeus,,", ",M. Lance
Pv13.215,Citharichthys stigmaeus,,", ",M. Lance
Pv13.215,Citharichthys stigmaeus,,", ",M. Lance
Pv13.215,Citharichthys stigmaeus,,", ",M. Lance
Pv13.217,Octopus spp.,,", ",M. Lance
Pv13.217,Octopus spp.,,", ",M. Lance
Pv13.217,Octopus spp.,,", ",M. Lance
Pv13.217,Hemilepidotus spp.,,", ",M. Lance
Pv13.217,Hemilepidotus spp.,,", ",M. Lance
Pv13.217,Hemilepidotus spp.,,", ",M. Lance
Pv13.217,Gadid or Merluccid,,", ",M. Lance
Pv13.217,Zoarcid spp.,,", ",M. Lance
Pv13.218,Citharichthys stigmaeus,,", ",M. Lance
Pv13.218,Citharichthys stigmaeus,,", ",M. Lance
Pv13.218,Citharichthys stigmaeus,,", ",M. Lance
Pv13.220,Citharichthys stigmaeus,,", ",M. Lance
Pv13.220,Citharichthys stigmaeus,,", ",M. Lance
Pv13.220,Citharichthys stigmaeus,,", ",M. Lance
Pv13.221,Bathylagid spp.,,", ",M. Lance
Pv13.221,Bathylagid spp.,,", ",M. Lance
Pv13.221,Merluccius productus,,", ",M. Lance
Pv13.221,Merluccius productus,,", ",M. Lance
Pv13.221,Thaleichthys pacificus,,", ",M. Lance
Pv13.221,Thaleichthys pacificus,,", ",M. Lance
Pv13.221,Thaleichthys pacificus,,", ",M. Lance
Pv13.221,Citharichthys stigmaeus,,", ",M. Lance
Pv13.221,Citharichthys stigmaeus,,", ",M. Lance
Pv13.221,Labrid spp.,,", ",M. Lance
Pv13.221,Thaleichthys pacificus,,", ",M. Lance
Pv13.222,Thaleichthys pacificus,,", ",M. Lance
Pv13.222,Thaleichthys pacificus,,", ",M. Lance
Pv13.222,Clupeid spp.,,", ",M. Lance
Pv13.223,Thaleichthys pacificus,,", ",M. Lance
Pv13.223,Rajid spp.,,", ",M. Lance
Pv13.224,Citharichthys stigmaeus,,", ",M. Lance
Pv13.224,Citharichthys stigmaeus,,", ",M. Lance
Pv13.224,Citharichthys stigmaeus,,", ",M. Lance
Pv13.224,Thaleichthys pacificus,,", ",M. Lance
Pv13.225,Rajid spp.,,", ",M. Lance
Pv13.225,Clupeid spp.,,", ",M. Lance
Pv13.225,Galiteuthis spp.,,", ",M. Lance
Pv13.226,Myxinid species,,", 1 eroded vt + bits",M. Lance
Pv13.227,Oncorhynchus spp.,Adult,", AD",M. Lance
Pv13.227,Clupeid spp.,,", ",M. Lance
Pv13.227,Gadid or Merluccid,,", ",M. Lance
Pv13.228,Clupeid spp.,,", ",M. Lance
Pv13.230,Gonatus spp.,,", ",M. Lance
Pv13.230,Gonatus spp.,,", ",M. Lance
Pv13.230,Citharichthys stigmaeus,,", ",M. Lance
Pv13.230,Citharichthys stigmaeus,,", ",M. Lance
Pv13.230,Citharichthys stigmaeus,,", ",M. Lance
Pv13.231,Clupeid spp.,,", ",M. Lance
Pv13.232,Clupeid spp.,,", ",M. Lance
Pv13.233,Citharichthys stigmaeus,,", ",M. Lance
Pv13.233,Oncorhynchus tshawytscha,Adult,", AD",M. Lance
Pv13.233,Oncorhynchus tshawytscha,,", MNIB=1",M. Lance
Pv13.236,Unidentified flatfish,,", ",M. Lance
Pv13.236,Unidentified flatfish,,", pincers, etc…",M. Lance
Pv13.236,Gadid or Merluccid,,", ",M. Lance
Pv13.236,Myxinid species,,", eroded bits, not other spp present",M. Lance
Pv13.237,Gadid or Merluccid,,", ",M. Lance
Pv13.237,Galiteuthis spp.,,", ",M. Lance
Pv13.237,Galiteuthis spp.,,", ",M. Lance
Pv13.237,Galiteuthis spp.,,", ",M. Lance
Pv13.238,Citharichthys stigmaeus,,", ",M. Lance
Pv13.238,Citharichthys stigmaeus,,", ",M. Lance
Pv13.238,Citharichthys stigmaeus,,", ",M. Lance
Pv13.239,Citharichthys stigmaeus,,", ",M. Lance
Pv13.239,Citharichthys stigmaeus,,", ",M. Lance
Pv13.239,Citharichthys stigmaeus,,", ",M. Lance
Pv13.239,Labrid spp.,,", ",M. Lance
Pv13.240,Citharichthys stigmaeus,,", ",M. Lance
Pv13.240,Merluccius productus,,", ",M. Lance
Pv13.240,Merluccius productus,,", ",M. Lance
Pv13.240,Merluccius productus,,", ",M. Lance
Pv13.240,Galiteuthis spp.,,", ",M. Lance
Pv13.241,Citharichthys stigmaeus,,", ",M. Lance
Pv13.242,Citharichthys stigmaeus,,", ",M. Lance
Pv13.242,Citharichthys stigmaeus,,", ",M. Lance
Pv13.242,Citharichthys stigmaeus,,", ",M. Lance
Pv13.242,Galiteuthis spp.,,", ",M. Lance
Pv13.243,Citharichthys stigmaeus,,", ",M. Lance
Pv13.243,Citharichthys stigmaeus,,", ",M. Lance
Pv13.243,Citharichthys stigmaeus,,", ",M. Lance
Pv13.244,Citharichthys stigmaeus,,", ",M. Lance
Pv13.244,Citharichthys stigmaeus,,", ",M. Lance
Pv13.246,Citharichthys stigmaeus,,", ",M. Lance
Pv13.246,Citharichthys stigmaeus,,", ",M. Lance
Pv13.246,Citharichthys stigmaeus,,", ",M. Lance
Pv13.246,Alosa sapidissima,,", ",M. Lance
Pv13.246,Alosa sapidissima,,", ",M. Lance
Pv13.246,Alosa sapidissima,,", ",M. Lance
Pv13.247,Citharichthys stigmaeus,,", ",M. Lance
Pv13.248,Merluccius productus,,", ",M. Lance
Pv13.249,Citharichthys stigmaeus,,", ",M. Lance
Pv13.249,Merluccius productus,,", ",M. Lance
Pv13.251,Diaphus theta,,", ",M. Lance
Pv13.251,Diaphus theta,,", ",M. Lance
Pv13.251,Citharichthys stigmaeus,,", ",M. Lance
Pv13.251,Citharichthys stigmaeus,,", ",M. Lance
Pv13.251,Citharichthys stigmaeus,,", ",M. Lance
Pv13.251,Galiteuthis spp.,,", ",M. Lance
Pv13.252,Thaleichthys pacificus,,", ",M. Lance
Pv13.252,Citharichthys stigmaeus,,", ",M. Lance
Pv13.252,Citharichthys stigmaeus,,", ",M. Lance
Pv13.253,Merluccius productus,,", ",M. Lance
Pv13.253,Merluccius productus,,", ",M. Lance
Pv13.254,Thaleichthys pacificus,,", ",M. Lance
Pv13.254,Thaleichthys pacificus,,", ",M. Lance
Pv13.254,Thaleichthys pacificus,,", ",M. Lance
Pv13.256,Merluccius productus,,", ",M. Lance
Pv13.256,Merluccius productus,,", ",M. Lance
Pv13.256,Merluccius productus,,", ",M. Lance
Pv13.256,Embiotocid spp.,,", ",M. Lance
Pv13.257,Citharichthys stigmaeus,,", ",M. Lance
Pv13.257,Citharichthys stigmaeus,,", ",M. Lance
Pv13.257,Citharichthys stigmaeus,,", ",M. Lance
Pv13.258,Oncorhynchus tshawytscha,,", MNIB = 1",M. Lance
Pv13.259,Citharichthys stigmaeus,,", ",M. Lance
Pv13.259,Citharichthys stigmaeus,,", ",M. Lance
Pv13.259,Citharichthys stigmaeus,,", ",M. Lance
Pv13.259,Merluccius productus,,", ",M. Lance
Pv13.259,Merluccius productus,,", ",M. Lance
Pv13.260,Bathylagid spp.,,", ",M. Lance
Pv13.260,Diaphus theta,,", ",M. Lance
Pv13.260,Citharichthys stigmaeus,,", ",M. Lance
Pv13.260,Citharichthys stigmaeus,,", ",M. Lance
Pv13.260,Citharichthys stigmaeus,,", ",M. Lance
Pv13.260,Oncorhynchus tshawytscha,,", MNIB=1",M. Lance
Pv13.260,Labrid spp.,,", ",M. Lance
Pv13.261,Citharichthys stigmaeus,,", ",M. Lance
Pv13.261,Citharichthys stigmaeus,,", ",M. Lance
Pv13.262,Citharichthys stigmaeus,,", ",M. Lance
Pv13.262,Citharichthys stigmaeus,,", ",M. Lance
Pv13.262,Citharichthys stigmaeus,,", ",M. Lance
Pv13.263,Thaleichthys pacificus,,", ",M. Lance
Pv13.263,Thaleichthys pacificus,,", ",M. Lance
Pv13.264,Merluccius productus,,", ",M. Lance
Pv13.264,Merluccius productus,,", ",M. Lance
Pv13.265,Cyclopterid spp.,,", 1 oto small, 2nd prey?",M. Lance
Pv13.265,Cyclopterid spp.,,", ",M. Lance
Pv13.266,Gadid or Merluccid,,", ",M. Lance
Pv13.267,Diaphus theta,,", ",M. Lance
Pv13.267,Citharichthys stigmaeus,,", ",M. Lance
Pv13.267,Citharichthys stigmaeus,,", ",M. Lance
Pv13.267,Citharichthys stigmaeus,,", ",M. Lance
Pv13.268,Thaleichthys pacificus,,", ",M. Lance
Pv13.268,Thaleichthys pacificus,,", ",M. Lance
Pv13.268,Thaleichthys pacificus,,", ",M. Lance
Pv13.268,Citharichthys stigmaeus,,", ",M. Lance
Pv13.268,Citharichthys stigmaeus,,", ",M. Lance
Pv13.268,Citharichthys stigmaeus,,", ",M. Lance
Pv13.269,Merluccius productus,,", ",M. Lance
Pv13.269,Merluccius productus,,", ",M. Lance
Pv13.269,Merluccius productus,,", ",M. Lance
Pv13.270,Merluccius productus,,", ",M. Lance
Pv13.271,Merluccius productus,,", ",M. Lance
Pv13.272,Merluccius productus,,", ",M. Lance
Pv13.273,Merluccius productus,,", ",M. Lance
Pv13.273,Citharichthys stigmaeus,,", ",M. Lance
Pv13.276,Citharichthys stigmaeus,,", ",M. Lance
Pv13.276,Citharichthys stigmaeus,,", ",M. Lance
Pv13.276,Citharichthys stigmaeus,,", ",M. Lance
Pv13.277,Merluccius productus,,", ",M. Lance
Pv13.277,Merluccius productus,,", ",M. Lance
Pv13.278,Clupeid spp.,,", ",M. Lance
Pv13.278,Gadid or Merluccid,,", ",M. Lance
Pv13.278,Oncorhynchus spp.,Adult,", AD",M. Lance
Pv13.279,Diaphus theta,,", ",M. Lance
Pv13.279,Diaphus theta,,", ",M. Lance
Pv13.279,Citharichthys stigmaeus,,", ",M. Lance
Pv13.279,Citharichthys stigmaeus,,", ",M. Lance
Pv13.279,Citharichthys stigmaeus,,", ",M. Lance
Pv13.279,Oncorhynchus tshawytscha,Juvenile,", JUV, MNIB=2",M. Lance
Pv13.279,Cyclopterid spp.,,", ",M. Lance
Pv13.281,Merluccius productus,,", ",M. Lance
Pv13.282,Unidentified flatfish,,", crab carapace",M. Lance
Pv13.282,Lampetra tridentata,,", ",M. Lance
Pv13.282,Lampetra tridentata,,", ",M. Lance
Pv13.282,Lampetra tridentata,,", ",M. Lance
Pv13.282,Citharichthys stigmaeus,,", ",M. Lance
Pv13.282,Citharichthys stigmaeus,,", ",M. Lance
Pv13.283,Merluccius productus,,", ",M. Lance
Pv13.285,Ommasteuthid spp.,,", ",M. Lance
Pv13.285,Ommasteuthid spp.,,", ",M. Lance
Pv13.285,Ommasteuthid spp.,,", ",M. Lance
Pv13.285,Ommasteuthid spp.,,", MNIB=2",M. Lance
Pv13.285,Clupeid spp.,,", ",M. Lance
Pv13.286,Merluccius productus,,", ",M. Lance
Pv13.286,Merluccius productus,,", ",M. Lance
Pv13.286,Merluccius productus,,", ",M. Lance
Pv13.287,Merluccius productus,,", ",M. Lance
Pv13.287,Merluccius productus,,", ",M. Lance
Pv13.288,Merluccius productus,,", ",M. Lance
Pv13.289,Platichthys stellatus,,", ",M. Lance
Pv13.289,Platichthys stellatus,,", ",M. Lance
Pv13.290,Merluccius productus,,", ",M. Lance
Pv13.292,Merluccius productus,,", ",M. Lance
Pv13.292,Merluccius productus,,", ",M. Lance
Pv13.292,Merluccius productus,,", ",M. Lance
Pv13.292,Oncorhynchus tshawytscha,Juvenile,", JUV, MNIB=1",M. Lance
Pv13.293,Citharichthys stigmaeus,,", ",M. Lance
Pv13.293,Merluccius productus,,", ",M. Lance
Pv13.294,Merluccius productus,,", ",M. Lance
Pv13.295,Merluccius productus,,", ",M. Lance
Pv13.295,Merluccius productus,,", ",M. Lance
Pv13.296,Citharichthys stigmaeus,,", ONLY 1 OTO",M. Lance
Pv13.296,Citharichthys stigmaeus,,", 6 VIALS!",M. Lance
Pv13.297,Citharichthys stigmaeus,,", ",M. Lance
Pv13.297,Citharichthys stigmaeus,,", ",M. Lance
Pv13.297,Citharichthys stigmaeus,,", ",M. Lance
Pv13.297,Oncorhynchus tshawytscha,,", MNIB=1",M. Lance
Pv13.299,Thaleichthys pacificus,,", ",M. Lance
Pv13.299,Thaleichthys pacificus,,", ",M. Lance
Pv13.299,Thaleichthys pacificus,,", ",M. Lance
Pv13.300,Thaleichthys pacificus,,", ",M. Lance
Pv13.300,Thaleichthys pacificus,,", ",M. Lance
Pv13.301,Clupeid spp.,,", ",M. Lance
Pv13.302,Clupeid spp.,,", ",M. Lance
Pv13.302,Gadid or Merluccid,,", ",M. Lance
Pv13.303,Bathylagid spp.,,", ",M. Lance
Pv13.303,Bathylagid spp.,,", ",M. Lance
Pv13.303,Bathylagid spp.,,", ",M. Lance
Pv13.303,Citharichthys stigmaeus,,", ",M. Lance
Pv13.303,Citharichthys stigmaeus,,", ",M. Lance
Pv13.303,Oncorhynchus tshawytscha,,", MNIB=1, 1 VT",M. Lance
Pv13.304,Citharichthys stigmaeus,,", ",M. Lance
Pv13.304,Citharichthys stigmaeus,,", ",M. Lance
Pv13.304,Citharichthys stigmaeus,,", ",M. Lance
Pv13.304,Thaleichthys pacificus,,", ",M. Lance
Pv13.304,Thaleichthys pacificus,,", ",M. Lance
Pv13.304,Thaleichthys pacificus,,", ",M. Lance
Pv13.304,Merluccius productus,,", ",M. Lance
Pv13.304,Merluccius productus,,", ",M. Lance
Pv13.306,Citharichthys stigmaeus,,", ",M. Lance
Pv13.306,Citharichthys stigmaeus,,", ",M. Lance
Pv13.306,Gadid or Merluccid,,", ",M. Lance
Pv13.306,Unidentified flatfish,,", ",M. Lance
Pv13.307,Citharichthys stigmaeus,,", ",M. Lance
Pv13.307,Citharichthys stigmaeus,,", ",M. Lance
Pv13.307,Citharichthys stigmaeus,,", ",M. Lance
Pv13.307,Thaleichthys pacificus,,", ",M. Lance
Pv13.307,Labrid spp.,,", ",M. Lance
Pv13.309,Thaleichthys pacificus,,", LG",M. Lance
Pv13.309,Thaleichthys pacificus,,", ",M. Lance
Pv13.309,Clupeid spp.,,", ",M. Lance
Pv13.309,Labrid spp.,,", ",M. Lance
Pv13.309,Ommasteuthid spp.,,", MED SZ",M. Lance
Pv13.309,Ommasteuthid spp.,,", MNIB=1",M. Lance
Pv13.309,Unidentified flatfish,,", crab megalope",M. Lance
Pv13.310,Citharichthys stigmaeus,,", ",M. Lance
Pv13.310,Citharichthys stigmaeus,,", ",M. Lance
Pv13.310,Thaleichthys pacificus,,", ",M. Lance
Pv13.310,Spirinchus thaleichthys,,", ",M. Lance
Pv13.310,Bathylagid spp.,,", ",M. Lance
Pv13.310,Bathylagid spp.,,", ",M. Lance
Pv13.311,Oncorhynchus spp.,,", EGGS",M. Lance
Pv13.311,Alosa sapidissima,,", ",M. Lance
Pv13.313,Clupeid spp.,,", ",M. Lance
Pv13.313,Oncorhynchus spp.,Adult,", AD, MNIB=1",M. Lance
Pv13.318,Oncorhynchus spp.,,", ",M. Lance
Pv13.318,Clupeid spp.,,", ",M. Lance
Pv13.318,Thaleichthys pacificus,,", ",M. Lance
Pv13.319,Oncorhynchus tshawytscha,Juvenile,", SM, JUV?, MNIB=1, not smolt",M. Lance
Pv13.321,Oncorhynchus spp.,Adult,", AD, MINB=1",M. Lance
Pv13.322,Oncorhynchus spp.,Adult,", AD, MNIB=1",M. Lance
Pv13.323,Oncorhynchus spp.,Adult,", AD, MNIB=1",M. Lance
Pv13.324,Gadid or Merluccid,,", ",M. Lance
Pv13.325,Alosa sapidissima,,", ",M. Lance
Pv13.325,Alosa sapidissima,,", ",M. Lance
Pv13.325,Labrid spp.,,", ",M. Lance
Pv13.326,Oncorhynchus spp.,Adult,", AD",M. Lance
Pv13.327,Oncorhynchus spp.,Adult,", AD, MNIB=1",M. Lance
Pv13.330,Oncorhynchus spp.,Adult,", AD, MNIB=1",M. Lance
Pv13.331,Lampetra tridentata,,", ",M. Lance
Pv13.331,Lampetra tridentata,,", ",M. Lance
Pv13.331,Lampetra tridentata,,", ",M. Lance
Pv13.331,Platichthys stellatus,,", ",M. Lance
Pv13.331,Platichthys stellatus,,", ",M. Lance
Pv13.331,Platichthys stellatus,,", ",M. Lance
Pv13.331,Labrid spp.,,", ",M. Lance
Pv13.332,Myxinid species,,", UNID BITS/PCS, cf salmon",M. Lance
Pv13.333,Myxinid species,,", NOTID SM BIT",M. Lance
Pv13.334,Lampetra tridentata,,", ",M. Lance
Pv13.334,Lampetra tridentata,,", ",M. Lance
Pv13.334,Lampetra tridentata,,", ",M. Lance
Pv13.334,Cyclopterid spp.,,", ",M. Lance
Pv13.334,Cyclopterid spp.,,", ",M. Lance
Pv13.334,Galiteuthis spp.,,", ",M. Lance
Pv13.334,Unidentified flatfish,,", CRAB CARAPACE",M. Lance
Pv13.335,Gadid or Merluccid,,", ",M. Lance
Pv13.335,Clupeid spp.,,", ",M. Lance
Pv13.336,Lampetra tridentata,,", ",M. Lance
Pv13.336,Lampetra tridentata,,", ",M. Lance
Pv13.336,Lampetra tridentata,,", ",M. Lance
Pv13.336,Galiteuthis spp.,,", ",M. Lance
Pv13.336,Unidentified flatfish,,", PINCERS",M. Lance
Pv13.337,Citharichthys stigmaeus,,", ",M. Lance
Pv13.337,Citharichthys stigmaeus,,", ",M. Lance
Pv13.337,Citharichthys stigmaeus,,", ",M. Lance
Pv13.338,Merluccius productus,,", ",M. Lance
Pv13.338,Merluccius productus,,", ",M. Lance
Pv13.339,Lampetra tridentata,,", ",M. Lance
Pv13.339,Oncorhynchus spp.,Adult,", AD, MNIB=1",M. Lance
Pv13.340,Citharichthys stigmaeus,,", ",M. Lance
Pv13.340,Citharichthys stigmaeus,,", ",M. Lance
Pv13.340,Citharichthys stigmaeus,,", ",M. Lance
Pv13.340,Diaphus theta,,", ",M. Lance
Pv13.341,Merluccius productus,,", ",M. Lance
Pv13.341,Merluccius productus,,", ",M. Lance
Pv13.341,Merluccius productus,,", ",M. Lance
Pv13.342,Cyclopterid spp.,,", ",M. Lance
Pv13.342,Cyclopterid spp.,,", ",M. Lance
Pv13.342,Cyclopterid spp.,,", ",M. Lance
Pv13.343,Merluccius productus,,", ",M. Lance
Pv13.343,Merluccius productus,,", ",M. Lance
Pv13.343,Merluccius productus,,", ",M. Lance
Pv13.343,Citharichthys stigmaeus,,", ",M. Lance
Pv13.343,Citharichthys stigmaeus,,", ",M. Lance
Pv13.343,Citharichthys stigmaeus,,", ",M. Lance
Pv13.343,Ommasteuthid spp.,,", JUV",M. Lance
Pv13.344,Cyclopterid spp.,,", ",M. Lance
Pv13.344,Cyclopterid spp.,,", ",M. Lance
Pv13.344,Cyclopterid spp.,,", ",M. Lance
Pv13.344,Citharichthys stigmaeus,,", ",M. Lance
Pv13.344,Citharichthys stigmaeus,,", ",M. Lance
Pv13.345,Octopus spp.,,", ",M. Lance
Pv13.345,Octopus spp.,,", ",M. Lance
Pv13.345,Platichthys stellatus,,", ",M. Lance
Pv13.345,Platichthys stellatus,,", ",M. Lance
Pv13.345,Platichthys stellatus,,", ",M. Lance
Pv13.346,Sebastes spp.,,", JUV",M. Lance
Pv13.346,Sebastes spp.,,", JUV",M. Lance
Pv13.346,Sebastes spp.,,", JUV",M. Lance
Pv13.347,Diaphus theta,,", ",M. Lance
Pv13.347,Diaphus theta,,", ",M. Lance
Pv13.347,Diaphus theta,,", ",M. Lance
Pv13.347,Ommasteuthid spp.,,", ",M. Lance
Pv13.347,Ommasteuthid spp.,,", ",M. Lance
Pv13.347,Ommasteuthid spp.,,", MNIB=1, JUV",M. Lance
Pv13.347,Oncorhynchus tshawytscha,Juvenile,", CF ONCKIS, JUV",M. Lance
Pv13.347,Oncorhynchus tshawytscha,,", ",M. Lance
Pv13.347,Labrid spp.,,", ",M. Lance
Pv13.347,Clupeid spp.,,", ",M. Lance
Pv13.348,Clupeid spp.,,", cf 2 eroded bones",M. Lance
Pv13.349,Cyclopterid spp.,,", ",M. Lance
Pv13.349,Cyclopterid spp.,,", ",M. Lance
Pv13.349,Cyclopterid spp.,,", ",M. Lance
Pv13.349,Lampetra tridentata,,", ",M. Lance
Pv13.349,Lampetra tridentata,,", ",M. Lance
Pv13.350,Bathylagid spp.,,", ",M. Lance
Pv13.350,Bathylagid spp.,,", ",M. Lance
Pv13.350,Citharichthys stigmaeus,,", ",M. Lance
Pv13.350,Citharichthys stigmaeus,,", ",M. Lance
Pv13.350,Citharichthys stigmaeus,,", ",M. Lance
Pv13.351,Diaphus theta,,", ",M. Lance
Pv13.351,Diaphus theta,,", ",M. Lance
Pv13.351,Citharichthys stigmaeus,,", ",M. Lance
Pv13.351,Citharichthys stigmaeus,,", ",M. Lance
Pv13.351,Citharichthys stigmaeus,,", ",M. Lance
Pv13.353,Citharichthys stigmaeus,,", ",M. Lance
Pv13.353,Citharichthys stigmaeus,,", ",M. Lance
Pv13.353,Merluccius productus,,", ",M. Lance
Pv13.354,Oncorhynchus tshawytscha,Juvenile,", JUV, MNIB=1",M. Lance
Pv13.354,Oncorhynchus tshawytscha,Juvenile,", JUV, MNIB=1",M. Lance
Pv13.354,Oncorhynchus tshawytscha,Juvenile,", JUV, MNIB=1",M. Lance
Pv13.354,Labrid spp.,,", ",M. Lance
Pv13.354,Thaleichthys pacificus,,", ",M. Lance
Pv13.354,Thaleichthys pacificus,,", ",M. Lance
Pv13.354,Thaleichthys pacificus,,", ",M. Lance
Pv13.354,Unidentified flatfish,,", ",M. Lance
Pv13.355,Oncorhynchus spp.,Adult,", AD",M. Lance
Pv13.356,Unidentified flatfish,,", JUST 3 FISH LENS",M. Lance
Pv13.357,Clupeid spp.,,", ",M. Lance
Pv13.358,Merluccius productus,,", ",M. Lance
Pv13.359,Oncorhynchus spp.,Adult,", AD, MNIB=1",M. Lance
Pv13.359,Gadid or Merluccid,,", ",M. Lance
Pv13.360,Pholid spp.,,", cf Starry",M. Lance
Pv13.360,Pholid spp.,,", cf Starry",M. Lance
Pv13.361,Cyclopterid spp.,,", ",M. Lance
Pv13.361,Cyclopterid spp.,,", ",M. Lance
Pv13.361,Cyclopterid spp.,,", ",M. Lance
Pv13.362,Oncorhynchus spp.,Adult,", AD, MNIB=1",M. Lance
Pv13.363,Oncorhynchus spp.,Adult,", AD",M. Lance
Pv13.364,Ommasteuthid spp.,,", 2 SZ",M. Lance
Pv13.364,Ommasteuthid spp.,,", 2 SZ",M. Lance
Pv13.364,Ommasteuthid spp.,,", ",M. Lance
Pv13.365,Cyclopterid spp.,,", ",M. Lance
Pv13.365,Cyclopterid spp.,,", ",M. Lance
Pv13.365,Gadid or Merluccid,,", ",M. Lance
Pv13.365,Gadid or Merluccid,,", ",M. Lance
Pv13.366,Citharichthys stigmaeus,,", ",M. Lance
Pv13.366,Citharichthys stigmaeus,,", ",M. Lance
Pv13.366,Citharichthys stigmaeus,,", ",M. Lance
Pv13.367,Merluccius productus,,", ",M. Lance
Pv13.367,Merluccius productus,,", ",M. Lance
Pv13.367,Merluccius productus,,", ",M. Lance
Pv13.367,Oncorhynchus spp.,Adult,", AD",M. Lance
Pv13.368,Citharichthys stigmaeus,,", ",M. Lance
Pv13.368,Citharichthys stigmaeus,,", ",M. Lance
Pv13.368,Citharichthys stigmaeus,,", ",M. Lance
Pv13.368,Citharichthys stigmaeus,,", ",M. Lance
Pv13.368,Ommasteuthid spp.,,", JUV",M. Lance
Pv13.368,Ommasteuthid spp.,,", JUV",M. Lance
Pv13.368,Ommasteuthid spp.,,", JUV",M. Lance
Pv13.368,Oncorhynchus tshawytscha,Juvenile,", JUV",M. Lance
Pv13.368,Oncorhynchus tshawytscha,,", ",M. Lance
Pv13.369,Bathylagid spp.,,", ",M. Lance
Pv13.369,Bathylagid spp.,,", ",M. Lance
Pv13.369,Merluccius productus,,", ",M. Lance
Pv13.369,Merluccius productus,,", ",M. Lance
Pv13.369,Merluccius productus,,", ",M. Lance
Pv13.369,Thaleichthys pacificus,,", 2 SZ",M. Lance
Pv13.369,Thaleichthys pacificus,,", 2 SZ",M. Lance
Pv13.369,Thaleichthys pacificus,,", ",M. Lance
Pv13.369,Clupeid spp.,,", ",M. Lance
Pv13.370,Unidentified flatfish,,", CRAB BITS/PCS",M. Lance
Pv13.370,Platichthys stellatus,,", ",M. Lance
Pv13.370,Platichthys stellatus,,", ",M. Lance
Pv13.370,Platichthys stellatus,,", ",M. Lance
Pv13.370,Pleuronectes vetulus,,", ",M. Lance
Pv13.370,Pleuronectes vetulus,,", ",M. Lance
Pv13.370,Pleuronectes vetulus,,", ",M. Lance
Pv13.370,Lampetra tridentata,,", ",M. Lance
Pv13.370,Lampetra tridentata,,", ",M. Lance
Pv13.370,Lampetra tridentata,,", ",M. Lance
Pv13.370,Rajid spp.,,", ",M. Lance
Pv13.370,Rhaochilus vacca,,", JUV",M. Lance
Pv13.371,Merluccius productus,,", ",M. Lance
Pv13.371,Merluccius productus,,", ",M. Lance
Pv13.372,Clupeid spp.,,", ",M. Lance
Pv13.373,Merluccius productus,,", ",M. Lance
Pv13.373,Merluccius productus,,", ",M. Lance
Pv13.373,Merluccius productus,,", ",M. Lance
Pv13.373,Clupeid spp.,,", ",M. Lance
Pv13.373,Oncorhynchus tshawytscha,Juvenile,", JUV, MNIB=1",M. Lance
Pv13.374,Oncorhynchus spp.,Juvenile,", JUV",M. Lance
Pv13.374,Oncorhynchus spp.,,", ",M. Lance
Pv13.375,Stichaeid spp.,,", ",M. Lance
Pv13.375,Stichaeid spp.,,", ",M. Lance
Pv13.375,Stichaeid spp.,,", ",M. Lance
Pv13.376,Cyclopterid spp.,,", ",M. Lance
Pv13.376,Cyclopterid spp.,,", ",M. Lance
Pv13.376,Cyclopterid spp.,,", ",M. Lance
Pv13.376,Platichthys stellatus,,", ",M. Lance
Pv13.376,Platichthys stellatus,,", ",M. Lance
Pv13.377,Merluccius productus,,", ",M. Lance
Pv13.378,Oncorhynchus tshawytscha,Adult,", AD",M. Lance
Pv13.378,Oncorhynchus tshawytscha,Adult,", AD",M. Lance
Pv13.379,Thaleichthys pacificus,,", ",M. Lance
Pv13.379,Labrid spp.,,", ",M. Lance
Pv13.380,Citharichthys stigmaeus,,", ",M. Lance
Pv13.380,Citharichthys stigmaeus,,", ",M. Lance
Pv13.380,Citharichthys stigmaeus,,", ",M. Lance
Pv13.381,Bathylagid spp.,,", ",M. Lance
Pv13.381,Bathylagid spp.,,", ",M. Lance
Pv13.381,Merluccius productus,,", ",M. Lance
Pv13.381,Merluccius productus,,", ",M. Lance
Pv13.381,Merluccius productus,,", ",M. Lance
Pv13.381,Thaleichthys pacificus,,", ",M. Lance
Pv13.381,Labrid spp.,,", ",M. Lance
Pv13.382,Citharichthys stigmaeus,,", ",M. Lance
Pv13.382,Citharichthys stigmaeus,,", ",M. Lance
Pv13.382,Citharichthys stigmaeus,,", ",M. Lance
Pv13.383,Citharichthys stigmaeus,,", ",M. Lance
Pv13.383,Citharichthys stigmaeus,,", ",M. Lance
Pv13.383,Citharichthys stigmaeus,,", ",M. Lance
Pv13.386,Oncorhynchus spp.,Adult,", AD",M. Lance
Pv13.387,Oncorhynchus spp.,,", cf ONCKIS",M. Lance
Pv13.387,Oncorhynchus spp.,,", EGGS",M. Lance
Pv13.388,Oncorhynchus spp.,Adult,", AD",M. Lance
Pv13.389,Citharichthys stigmaeus,,", ",M. Lance
Pv13.389,Citharichthys stigmaeus,,", ",M. Lance
Pv13.389,Citharichthys stigmaeus,,", ",M. Lance
Pv13.390,Oncorhynchus spp.,Adult,", AD",M. Lance
Pv13.391,Unidentified flatfish,,", ",M. Lance
Pv13.391,Citharichthys stigmaeus,,", ",M. Lance
Pv13.391,Citharichthys stigmaeus,,", ",M. Lance
Pv13.391,Citharichthys stigmaeus,,", ",M. Lance
Pv13.391,Oncorhynchus tshawytscha,Juvenile,", JUV
JUV",M. Lance
Pv13.391,Oncorhynchus tshawytscha,Juvenile,", JUV",M. Lance
Pv13.391,Ommasteuthid spp.,,", JUV",M. Lance
Pv13.391,Ommasteuthid spp.,,", JUV",M. Lance
Pv13.391,Ommasteuthid spp.,,", ",M. Lance
Pv13.391,Alosa sapidissima,,", ",M. Lance
Pv13.391,Alosa sapidissima,,", ",M. Lance
Pv13.391,Alosa sapidissima,,", ",M. Lance
Pv13.391,Labrid spp.,,", ",M. Lance
Pv13.392,Oncorhynchus spp.,,", ",M. Lance
Pv13.393,Gonatus spp.,,", ",M. Lance
Pv13.393,Gonatus spp.,,", ",M. Lance
Pv13.393,Citharichthys stigmaeus,,", ",M. Lance
Pv13.393,Citharichthys stigmaeus,,", ",M. Lance
Pv13.393,Citharichthys stigmaeus,,", ",M. Lance
Pv13.394,Oncorhynchus spp.,,", ",M. Lance
Pv13.394,Oncorhynchus spp.,,", ",M. Lance
Pv13.395,Oncorhynchus spp.,,", ",M. Lance
Pv13.396,Clupeid spp.,,", ",M. Lance
Pv13.397,Citharichthys stigmaeus,,", ",M. Lance
Pv13.398,Oncorhynchus spp.,Adult,", AD - SMALLISH",M. Lance
Pv13.399,Oncorhynchus spp.,Adult,", AD - SMALLISH",M. Lance
Pv13.400,Ommasteuthid spp.,,", ",M. Lance
Pv13.400,Ommasteuthid spp.,,", ",M. Lance
Pv13.400,Ommasteuthid spp.,,", ",M. Lance
Pv13.401,Oncorhynchus spp.,,", ONCSPP",M. Lance
Pv13.401,Oncorhynchus spp.,,", cf ONCNER",M. Lance
Pv13.401,Oncorhynchus spp.,,", ONCSPP",M. Lance
Pv13.401,Oncorhynchus spp.,,", ",M. Lance
Pv13.402,Unidentified flatfish,,", ",M. Lance
Pv13.402,Oncorhynchus spp.,,", ",M. Lance
Pv13.403,Unidentified flatfish,,", CRAB BITS",M. Lance
Pv13.406,Oncorhynchus spp.,,", 2 PCS",M. Lance
Pv13.406,Oncorhynchus spp.,Adult,", AD",M. Lance
Pv13.406,Thaleichthys pacificus,,", ",M. Lance
Pv13.406,Thaleichthys pacificus,,", ",M. Lance
Pv13.406,Clupeid spp.,,", ",M. Lance
Pv13.407,Bathylagid spp.,,", ",M. Lance
Pv13.407,Bathylagid spp.,,", ",M. Lance
Pv13.407,Thaleichthys pacificus,,", ",M. Lance
Pv13.407,Thaleichthys pacificus,,", ",M. Lance
Pv13.407,Thaleichthys pacificus,,", ",M. Lance
Pv13.408,Merluccius productus,,", ",M. Lance
Pv13.408,Merluccius productus,,", ",M. Lance
Pv13.408,Merluccius productus,,", ",M. Lance
Pv13.408,Unidentified flatfish,,", ",M. Lance
Pv13.408,Osmerid spp.,,", cf - vts very eroded",M. Lance
Pv13.409,Ommasteuthid spp.,,", classic shape - AD",M. Lance
Pv13.409,Ommasteuthid spp.,,", SM AD",M. Lance
Pv13.410,Ommasteuthid spp.,,", AD",M. Lance
Pv13.410,Ommasteuthid spp.,,", AD",M. Lance
Pv13.410,Ommasteuthid spp.,,", AD",M. Lance
Pv13.410,Oncorhynchus spp.,Adult,", ONCSPP AD",M. Lance
Pv13.410,Oncorhynchus spp.,Adult,", ONCSPP AD",M. Lance
Pv13.410,Oncorhynchus spp.,,", ",M. Lance
Pv13.411,Oncorhynchus spp.,,", ",M. Lance
Pv13.412,Oncorhynchus spp.,,", cf ONCNER",M. Lance
Pv13.412,Oncorhynchus spp.,,", ",M. Lance
Pv13.413,Oncorhynchus spp.,,", ",M. Lance
Pv13.414,Oncorhynchus spp.,,", EGGS",M. Lance
Pv13.415,Ommasteuthid spp.,,", AD",M. Lance
Pv13.415,Ommasteuthid spp.,,", AD",M. Lance
Pv13.415,Gadid or Merluccid,,", ",M. Lance
Pv13.416,Oncorhynchus spp.,,", ",M. Lance
Pv13.417,Oncorhynchus spp.,,", ",M. Lance
Pv13.418,Oncorhynchus spp.,,", ",M. Lance
Pv13.419,Oncorhynchus spp.,,", ",M. Lance
Pv13.420,Pholid spp.,,", ",M. Lance
Pv13.420,Pholid spp.,,", ",M. Lance
Pv13.420,Pholid spp.,,", ",M. Lance
Pv13.421,Oncorhynchus spp.,Adult,", cf ONCKIS, AD",M. Lance
Pv13.421,Oncorhynchus spp.,,", ",M. Lance
Pv13.422,Oncorhynchus spp.,,", ",M. Lance
Pv13.423,Oncorhynchus spp.,,", eggs",M. Lance
Pv13.424,Oncorhynchus spp.,,", ",M. Lance
Pv13.425,Oncorhynchus spp.,,", ",M. Lance
Pv13.426,Oncorhynchus spp.,,", EGGS",M. Lance
Pv13.427,Oncorhynchus spp.,,", ",M. Lance
Pv13.427,Oncorhynchus spp.,,", jar of eggs!",M. Lance
Pv13.428,Oncorhynchus spp.,,", ",M. Lance
Pv13.428,Oncorhynchus spp.,,", ",M. Lance
Pv13.428,Oncorhynchus spp.,,", ",M. Lance
Pv13.429,Ommasteuthid spp.,,", AD",M. Lance
Pv13.429,Ommasteuthid spp.,,", ",M. Lance
Pv13.429,Oncorhynchus spp.,,", ",M. Lance
Pv13.430,Oncorhynchus spp.,,", ",M. Lance
Pv13.431,Oncorhynchus spp.,,", ",M. Lance
Pv13.432,Oncorhynchus spp.,,", ",M. Lance
Pv13.433,Thaleichthys pacificus,,", ",M. Lance
Pv13.433,Oncorhynchus spp.,,", ",M. Lance
Pv13.434,Ommasteuthid spp.,,", AD",M. Lance
Pv13.434,Ommasteuthid spp.,,", ",M. Lance
Pv13.435,Oncorhynchus spp.,,", vial of eggs",M. Lance
Pv13.436,Oncorhynchus spp.,,", ",M. Lance
Pv13.437,Oncorhynchus spp.,,", cf - only 1 branchial",M. Lance
Pv13.438,Oncorhynchus spp.,,", ",M. Lance
Pv13.439,Oncorhynchus spp.,,", ",M. Lance
Pv13.440,Oncorhynchus spp.,,", ",M. Lance
Pv13.441,Oncorhynchus spp.,,", ",M. Lance
Pv13.442,Oncorhynchus spp.,,", cf ONCNER",M. Lance
Pv13.442,Oncorhynchus spp.,,", ",M. Lance
Pv13.443,Oncorhynchus spp.,,", cf bits only",M. Lance
Pv13.444,Oncorhynchus spp.,,", ",M. Lance
Pv13.445,Oncorhynchus spp.,,", ",M. Lance
Pv13.446,Oncorhynchus spp.,,", ",M. Lance
Pv13.446,Oncorhynchus spp.,,", ",M. Lance
Pv13.447,Oncorhynchus spp.,,", ",M. Lance
Pv13.448,Oncorhynchus spp.,,", ",M. Lance
Pv13.449,Oncorhynchus spp.,,", cf ONCNER",M. Lance
Pv13.449,Oncorhynchus spp.,,", ",M. Lance
Pv13.451,Oncorhynchus spp.,,", ",M. Lance
Pv13.452,Citharichthys stigmaeus,,", ",M. Lance
Pv13.452,Citharichthys stigmaeus,,", ",M. Lance
Pv13.452,Merluccius productus,,", ",M. Lance
Pv13.452,Merluccius productus,,", ",M. Lance
Pv13.452,Oncorhynchus spp.,,", ",M. Lance
Pv13.453,Oncorhynchus tshawytscha,Juvenile,", JUV, MNIB=1",M. Lance
Pv13.453,Oncorhynchus spp.,Adult,", AD",M. Lance
Pv13.454,Merluccius productus,,", ",M. Lance
Pv13.454,Merluccius productus,,", ",M. Lance
Pv13.454,Merluccius productus,,", ",M. Lance
Pv13.454,Unidentified flatfish,,", PEN",M. Lance
Pv13.455,Cyclopterid spp.,,", ",M. Lance
Pv13.455,Cyclopterid spp.,,", ",M. Lance
Pv13.455,Cyclopterid spp.,,", ",M. Lance
Pv13.455,Lampetra tridentata,,", ",M. Lance
Pv13.455,Lampetra tridentata,,", ",M. Lance
Pv13.455,Lampetra tridentata,,", ",M. Lance
Pv13.455,Unidentified flatfish,,", jar of crustaceans",M. Lance
Pv13.456,Citharichthys stigmaeus,,", ",M. Lance
Pv13.456,Citharichthys stigmaeus,,", ",M. Lance
Pv13.456,Citharichthys stigmaeus,,", ",M. Lance
Pv13.457,Merluccius productus,,", ",M. Lance
Pv13.457,Clupeid spp.,,", ",M. Lance
Pv13.458,Unidentified flatfish,,", 3 vials of crustaceans",M. Lance
Pv13.458,Cyclopterid spp.,,", ",M. Lance
Pv13.458,Cyclopterid spp.,,", ",M. Lance
Pv13.459,Unidentified flatfish,,", PEN",M. Lance
Pv13.459,Oncorhynchus spp.,,", ",M. Lance
Pv13.459,Oncorhynchus tshawytscha,Juvenile,", JUV, MNIB=1",M. Lance
Pv13.460,Citharichthys stigmaeus,,", ",M. Lance
Pv13.460,Citharichthys stigmaeus,,", ",M. Lance
Pv13.460,Citharichthys stigmaeus,,", ",M. Lance
Pv13.461,Ommasteuthid spp.,,", ad",M. Lance
Pv13.461,Ommasteuthid spp.,,", ad",M. Lance
Pv13.461,Ommasteuthid spp.,,", ad",M. Lance
Pv13.462,Thaleichthys pacificus,,", ",M. Lance
Pv13.463,Clupeid spp.,,", ",M. Lance
Pv13.463,Merluccius productus,,", ",M. Lance
Pv13.464,Citharichthys stigmaeus,,", ",M. Lance
Pv13.464,Citharichthys stigmaeus,,", ",M. Lance
Pv13.464,Labrid spp.,,", ",M. Lance
Pv13.464,Merluccius productus,,", ",M. Lance
Pv13.464,Merluccius productus,,", ",M. Lance
Pv13.464,Merluccius productus,,", ",M. Lance
Pv13.464,Oncorhynchus tshawytscha,Juvenile,", JUV, MNIB=1",M. Lance
Pv13.464,Oncorhynchus tshawytscha,,", ",M. Lance
Pv13.465,Labrid spp.,,", ",M. Lance
Pv13.465,Clupeid spp.,,", ",M. Lance
Pv13.465,Gadid or Merluccid,,", ",M. Lance
Pv13.465,Unidentified flatfish,,", CLAW",M. Lance
Pv13.465,Cyclopterid spp.,,", ",M. Lance
Pv13.465,Cyclopterid spp.,,", ",M. Lance
Pv13.465,Cyclopterid spp.,,", ",M. Lance
Pv13.466,Cyclopterid spp.,,", ",M. Lance
Pv13.466,Cyclopterid spp.,,", ",M. Lance
Pv13.466,Cyclopterid spp.,,", ",M. Lance
Pv13.467,Oncorhynchus spp.,,", ",M. Lance
Pv13.468,Cyclopterid spp.,,", ",M. Lance
Pv13.468,Cyclopterid spp.,,", ",M. Lance
Pv13.468,Cyclopterid spp.,,", ",M. Lance
Pv13.468,Rhaochilus vacca,,", ",M. Lance
Pv13.468,Rhaochilus vacca,,", ",M. Lance
Pv13.469,Porichthys notatus,,", ",M. Lance
Pv13.469,Porichthys notatus,,", ",M. Lance
Pv13.469,Porichthys notatus,,", ",M. Lance
Pv13.469,Unidentified flatfish,,", ",M. Lance
Pv13.469,Gadid or Merluccid,,", ",M. Lance
Pv13.469,Gadid or Merluccid,,", ",M. Lance
Pv13.470,Gadid or Merluccid,,", ",M. Lance
Pv13.470,Gadid or Merluccid,,", ",M. Lance
Pv13.470,Labrid spp.,,", ",M. Lance
Pv13.472,Cyclopterid spp.,,", ",M. Lance
Pv13.472,Cyclopterid spp.,,", ",M. Lance
Pv13.472,Cyclopterid spp.,,", ",M. Lance
Pv13.472,Lampetra tridentata,,", ",M. Lance
Pv13.472,Lampetra tridentata,,", ",M. Lance
Pv13.472,Lampetra tridentata,,", ",M. Lance
Pv13.472,Porichthys notatus,,", ",M. Lance
Pv13.472,Porichthys notatus,,", ",M. Lance
Pv13.472,Mallotus villosus,,", ",M. Lance
Pv13.472,Mallotus villosus,,", ",M. Lance
Pv13.472,Mallotus villosus,,", ",M. Lance
Pv13.472,Stichaeid spp.,,", ",M. Lance
Pv13.472,Stichaeid spp.,,", ",M. Lance
Pv13.472,Stichaeid spp.,,", ",M. Lance
Pv13.472,Hemilepidotus spp.,,", ",M. Lance
Pv13.472,Hemilepidotus spp.,,", ",M. Lance
Pv13.472,Hemilepidotus spp.,,", ",M. Lance
Pv13.474,Citharichthys stigmaeus,,", ",M. Lance
Pv13.474,Citharichthys stigmaeus,,", ",M. Lance
Pv13.474,Citharichthys stigmaeus,,", ",M. Lance
Pv13.475,Gadid or Merluccid,,", ",M. Lance
Pv13.475,Cyclopterid spp.,,", ",M. Lance
Pv13.475,Cyclopterid spp.,,", ",M. Lance
Pv13.476,Lampetra tridentata,,", ",M. Lance
Pv13.476,Lampetra tridentata,,", ",M. Lance
Pv13.476,Lampetra tridentata,,", ",M. Lance
Pv13.476,Cyclopterid spp.,,", ",M. Lance
Pv13.476,Cyclopterid spp.,,", ",M. Lance
Pv13.477,Merluccius productus,,", ",M. Lance
Pv13.477,Merluccius productus,,", ",M. Lance
Pv13.477,Thaleichthys pacificus,,", ",M. Lance
Pv13.478,Oncorhynchus spp.,,", ",M. Lance
Pv13.479,Diaphus theta,,", ",M. Lance
Pv13.479,Diaphus theta,,", PEN",M. Lance
Pv13.479,Oncorhynchus spp.,,", ",M. Lance
Pv13.479,Clupeid spp.,,", ",M. Lance
Pv13.480,Oncorhynchus spp.,,", ",M. Lance
Pv13.481,Citharichthys stigmaeus,,", ",M. Lance
Pv13.482,Lampetra tridentata,,", ",M. Lance
Pv13.482,Lampetra tridentata,,", ",M. Lance
Pv13.482,Lampetra tridentata,,", ",M. Lance
Pv13.482,Stichaeid spp.,,", ",M. Lance
Pv13.482,Stichaeid spp.,,", ",M. Lance
Pv13.483,Cyclopterid spp.,,", ",M. Lance
Pv13.483,Cyclopterid spp.,,", ",M. Lance
Pv13.483,Cyclopterid spp.,,", ",M. Lance
Pv13.483,Citharichthys stigmaeus,,", ",M. Lance
Pv13.483,Citharichthys stigmaeus,,", ",M. Lance
Pv13.483,Citharichthys stigmaeus,,", ",M. Lance
Pv13.484,Pholid spp.,,", ",M. Lance
Pv13.484,Pholid spp.,,", ",M. Lance
Pv13.484,Pholid spp.,,", ",M. Lance
Pv13.484,Pholid spp.,,", ",M. Lance
Pv13.485,Citharichthys stigmaeus,,", ",M. Lance
Pv13.485,Citharichthys stigmaeus,,", ",M. Lance
Pv13.485,Cyclopterid spp.,,", ",M. Lance
Pv13.485,Cyclopterid spp.,,", ",M. Lance
Pv13.486,Oncorhynchus spp.,,", ",M. Lance
Pv13.487,Lampetra tridentata,,", ",M. Lance
Pv13.487,Lampetra tridentata,,", ",M. Lance
Pv13.487,Lampetra tridentata,,", ",M. Lance
Pv13.487,Oncorhynchus spp.,,", ",M. Lance
Pv13.487,Unidentified flatfish,,", CRAB PCS",M. Lance
Pv13.488,Cyclopterid spp.,,", ",M. Lance
Pv13.488,Cyclopterid spp.,,", ",M. Lance
Pv13.488,Cyclopterid spp.,,", ",M. Lance
Pv13.489,Oncorhynchus spp.,,", ",M. Lance
Pv13.490,Stichaeid spp.,,", ",M. Lance
Pv13.490,Stichaeid spp.,,", ",M. Lance
Pv13.490,Stichaeid spp.,,", ",M. Lance
Pv13.491,Oncorhynchus spp.,,", ",M. Lance
Pv13.492,Bathylagid spp.,,", ",M. Lance
Pv13.492,Oncorhynchus spp.,,", ",M. Lance
Pv13.492,Clupeid spp.,,", ",M. Lance
Pv13.493,Merluccius productus,,", ",M. Lance
Pv13.493,Clupeid spp.,,", ",M. Lance
Pv13.494,Oncorhynchus spp.,,", cf ONCKIS",M. Lance
Pv13.494,Oncorhynchus spp.,,", ",M. Lance
Pv13.494,Ommasteuthid spp.,,", ",M. Lance
Pv13.494,Ommasteuthid spp.,,", eggs",M. Lance
Pv13.495,Lampetra tridentata,,", ",M. Lance
Pv13.495,Lampetra tridentata,,", ",M. Lance
Pv13.495,Lampetra tridentata,,", ",M. Lance
Pv13.495,Unidentified flatfish,,", crab pc",M. Lance
Pv13.496,Citharichthys stigmaeus,,", ",M. Lance
Pv13.496,Citharichthys stigmaeus,,", ",M. Lance
Pv13.496,Citharichthys stigmaeus,,", ",M. Lance
Pv13.496,Oncorhynchus tshawytscha,Adult,", sm, juv or ad?",M. Lance
Pv13.496,Oncorhynchus tshawytscha,,", ",M. Lance
Pv13.497,Oncorhynchus spp.,,", cf ONCNER",M. Lance
Pv13.497,Oncorhynchus spp.,,", ",M. Lance
Pv13.498,Cyclopterid spp.,,", ",M. Lance
Pv13.498,Cyclopterid spp.,,", ",M. Lance
Pv13.498,Cyclopterid spp.,,", ",M. Lance
Pv13.498,Citharichthys stigmaeus,,", ",M. Lance
Pv13.498,Citharichthys stigmaeus,,", ",M. Lance
Pv13.499,Citharichthys stigmaeus,,", ",M. Lance
Pv13.499,Citharichthys stigmaeus,,", ",M. Lance
Pv13.499,Citharichthys stigmaeus,,", ",M. Lance
Pv13.499,Oncorhynchus tshawytscha,,", ",M. Lance
Pv13.500,Cyclopterid spp.,,", ",M. Lance
Pv13.500,Cyclopterid spp.,,", ",M. Lance
Pv13.500,Cyclopterid spp.,,", ",M. Lance
Pv13.500,Oncorhynchus spp.,,", ",M. Lance
Pv13.501,Gadid or Merluccid,,", CF THECHA",M. Lance
Pv13.501,Gadid or Merluccid,,", CF THECHA",M. Lance
Pv13.501,Gadid or Merluccid,,", ",M. Lance
Pv13.501,Oncorhynchus spp.,,", ",M. Lance
Pv13.501,Zoarcid spp.,,", ",M. Lance
Pv13.502,Lampetra tridentata,,", ",M. Lance
Pv13.502,Lampetra tridentata,,", ",M. Lance
Pv13.502,Lampetra tridentata,,", ",M. Lance
Pv13.502,Platichthys stellatus,,", ",M. Lance
Pv13.503,Oncorhynchus spp.,,", ",M. Lance
Pv13.504,Oncorhynchus spp.,,", ",M. Lance
Pv13.505,Oncorhynchus spp.,,", ",M. Lance
Pv13.506,Citharichthys stigmaeus,,", ",M. Lance
Pv13.506,Citharichthys stigmaeus,,", ",M. Lance
Pv13.506,Citharichthys stigmaeus,,", ",M. Lance
Pv13.507,Coloabis saira,,", ",M. Lance
Pv13.507,Coloabis saira,,", ",M. Lance
Pv13.507,Coloabis saira,,", ",M. Lance
Pv13.507,Thaleichthys pacificus,,", ",M. Lance
Pv13.507,Thaleichthys pacificus,,", ",M. Lance
Pv13.507,Cyclopterid spp.,,", ",M. Lance
Pv13.507,Cyclopterid spp.,,", ",M. Lance
Pv13.508,Lampetra tridentata,,", ",M. Lance
Pv13.508,Lampetra tridentata,,", ",M. Lance
Pv13.508,Lampetra tridentata,,", ",M. Lance
Pv13.508,Platichthys stellatus,,", CF STARRY",M. Lance
Pv13.508,Platichthys stellatus,,", CF STARRY",M. Lance
Pv13.508,Platichthys stellatus,,", ",M. Lance
Pv13.509,Oncorhynchus spp.,,", ",M. Lance
Pv13.510,Bathylagid spp.,,", ",M. Lance
Pv13.510,Bathylagid spp.,,", ",M. Lance
Pv13.510,Oncorhynchus spp.,,", ",M. Lance
Pv13.511,Oncorhynchus spp.,,", ",M. Lance
Pv13.511,Oncorhynchus spp.,,", ",M. Lance
Pv13.511,Oncorhynchus spp.,,", ",M. Lance
Pv13.511,Thaleichthys pacificus,,", ",M. Lance
Pv13.511,Thaleichthys pacificus,,", ",M. Lance
Pv13.511,Clupeid spp.,,", ",M. Lance
Pv13.512,Citharichthys stigmaeus,,", ",M. Lance
Pv13.512,Citharichthys stigmaeus,,", ",M. Lance
Pv13.513,Oncorhynchus spp.,,", ",M. Lance
Pv13.513,Citharichthys stigmaeus,,", ",M. Lance
Pv13.514,Oncorhynchus spp.,,", ",M. Lance
Pv13.515,Bathylagid spp.,,", ",M. Lance
Pv13.515,Bathylagid spp.,,", ",M. Lance
Pv13.515,Thaleichthys pacificus,,", ",M. Lance
Pv13.515,Thaleichthys pacificus,,", ",M. Lance
Pv13.515,Thaleichthys pacificus,,", ",M. Lance
Pv13.515,Citharichthys stigmaeus,,", ",M. Lance
Pv13.516,Oncorhynchus tshawytscha,,", ",M. Lance
Pv13.516,Citharichthys stigmaeus,,", ",M. Lance
Pv13.516,Citharichthys stigmaeus,,", ",M. Lance
Pv13.516,Citharichthys stigmaeus,,", ",M. Lance
Pv13.517,Bathylagid spp.,,", ",M. Lance
Pv13.517,Bathylagid spp.,,", ",M. Lance
Pv13.517,Labrid spp.,,", ",M. Lance
Pv13.518,Oncorhynchus spp.,,", ",M. Lance
Pv13.519,Thaleichthys pacificus,,", ",M. Lance
Pv13.519,Thaleichthys pacificus,,", ",M. Lance
Pv13.519,Thaleichthys pacificus,,", ",M. Lance
Pv13.520,Oncorhynchus spp.,,", ",M. Lance
Pv13.521,Oncorhynchus spp.,,", ",M. Lance
Pv13.522,Citharichthys stigmaeus,,", ",M. Lance
Pv13.522,Citharichthys stigmaeus,,", ",M. Lance
Pv13.522,Unidentified flatfish,,", ",M. Lance
Pv13.523,Oncorhynchus spp.,,", ",M. Lance
Pv13.525,Clupeid spp.,,", ",M. Lance
Pv13.526,Bathylagid spp.,,", ",M. Lance
Pv13.526,Oncorhynchus spp.,,", V ERODED",M. Lance
Pv13.526,Oncorhynchus spp.,,", ",M. Lance
Pv13.527,Bathylagid spp.,,", ",M. Lance
Pv13.527,Bathylagid spp.,,", ",M. Lance
Pv13.527,Bathylagid spp.,,", ",M. Lance
Pv13.527,Oncorhynchus spp.,,", ",M. Lance
Pv13.528,Oncorhynchus spp.,,", ",M. Lance
Pv13.529,Bathylagid spp.,,", ",M. Lance
Pv13.529,Oncorhynchus spp.,,", ",M. Lance
Pv13.530,Oncorhynchus spp.,,", ",M. Lance
Pv13.531,Thaleichthys pacificus,,", ",M. Lance
Pv13.531,Thaleichthys pacificus,,", ",M. Lance
Pv13.532,Labrid spp.,,", ",M. Lance
Pv13.532,Ommasteuthid spp.,,", ",M. Lance
Pv13.532,Ommasteuthid spp.,,", ",M. Lance
Pv13.533,Myxinid species,,", BONE FRAGS",M. Lance
Pv13.534,Oncorhynchus spp.,,", ",M. Lance
Pv13.534,Oncorhynchus spp.,,", ",M. Lance
Pv13.535,Oncorhynchus spp.,,", ",M. Lance
Pv13.536,Thaleichthys pacificus,,", ",M. Lance
Pv13.536,Thaleichthys pacificus,,", ",M. Lance
Pv13.537,Gonatus spp.,,", ",M. Lance
Pv13.537,Gonatus spp.,,", ",M. Lance
Pv13.537,Oncorhynchus tshawytscha,Juvenile,", TINY SMOLTS
TINY SMOLTS",M. Lance
Pv13.537,Oncorhynchus tshawytscha,Juvenile,", TINY SMOLTS",M. Lance
Pv13.537,Oncorhynchus tshawytscha,,", ",M. Lance
Pv13.537,Citharichthys stigmaeus,,", ",M. Lance
Pv13.537,Citharichthys stigmaeus,,", ",M. Lance
Pv13.537,Citharichthys stigmaeus,,", ",M. Lance
Pv13.537,Thaleichthys pacificus,,", ",M. Lance
Pv13.537,Thaleichthys pacificus,,", ",M. Lance
Pv13.537,Thaleichthys pacificus,,", ",M. Lance
Pv13.538,Ommasteuthid spp.,,", ",M. Lance
Pv13.538,Ommasteuthid spp.,,", ",M. Lance
Pv13.539,Ommasteuthid spp.,,", ",M. Lance
Pv13.539,Ommasteuthid spp.,,", ",M. Lance
Pv13.539,Ommasteuthid spp.,,", ",M. Lance
Pv13.540,Myxinid species,,", BONE FRAGS, POSS RAJSPP",M. Lance
Pv13.541,Oncorhynchus spp.,,", ",M. Lance
Pv13.541,Pholid spp.,,", ",M. Lance
Pv13.542,Clupeid spp.,,", ",M. Lance
Pv13.542,Alosa sapidissima,,", ",M. Lance
Pv13.542,Oncorhynchus tshawytscha,,", ",M. Lance
Pv13.542,Oncorhynchus tshawytscha,,", ",M. Lance
Pv13.543,Oncorhynchus spp.,,", ",M. Lance
Pv13.544,Oncorhynchus spp.,,", ",M. Lance
Pv13.545,Myxinid species,,", few bits/pcs",M. Lance
Pv13.546,Oncorhynchus spp.,,", ",M. Lance
Pv13.547,Oncorhynchus spp.,,", EGG BITS",M. Lance
Pv13.548,Oncorhynchus spp.,,", ",M. Lance
Pv13.549,Oncorhynchus spp.,,", ",M. Lance
Pv13.550,Ommasteuthid spp.,,", ",M. Lance
Pv13.550,Ommasteuthid spp.,,", ",M. Lance
Pv13.551,Thaleichthys pacificus,,", ",M. Lance
Pv13.552,Lampetra tridentata,,", ",M. Lance
Pv13.552,Lampetra tridentata,,", ",M. Lance
Pv13.552,Lampetra tridentata,,", ",M. Lance
Pv13.552,Citharichthys stigmaeus,,", ",M. Lance
Pv13.552,Citharichthys stigmaeus,,", ",M. Lance
Pv13.552,Citharichthys stigmaeus,,", ",M. Lance
Pv13.553,Oncorhynchus spp.,,", ",M. Lance
Pv13.554,Oncorhynchus spp.,,", ",M. Lance
Pv13.555,Oncorhynchus spp.,,", EGGS",M. Lance
Pv13.556,Oncorhynchus spp.,,", EGGS",M. Lance
Pv13.557,Oncorhynchus spp.,,", ",M. Lance
Pv13.558,Oncorhynchus spp.,,", ",M. Lance
Pv13.559,Oncorhynchus spp.,,", EGGS",M. Lance
Pv13.560,Oncorhynchus spp.,,", ",M. Lance
Pv13.561,Cyclopterid spp.,,", ",M. Lance
Pv13.561,Cyclopterid spp.,,", ",M. Lance
Pv13.561,Cyclopterid spp.,,", ",M. Lance
Pv13.561,Labrid spp.,,", ",M. Lance
Pv13.562,Thaleichthys pacificus,,", ",M. Lance
Pv13.562,Thaleichthys pacificus,,", ",M. Lance
Pv13.562,Thaleichthys pacificus,,", ",M. Lance
Pv13.562,Labrid spp.,,", ",M. Lance
Pv13.562,Unidentified flatfish,,", ",M. Lance
Pv13.562,Citharichthys stigmaeus,,", ",M. Lance
Pv13.563,Oncorhynchus tshawytscha,,", ",M. Lance
Pv13.563,Oncorhynchus tshawytscha,,", ",M. Lance
Pv13.563,Citharichthys stigmaeus,,", ",M. Lance
Pv13.563,Citharichthys stigmaeus,,", ",M. Lance
Pv13.564,Thaleichthys pacificus,,", ",M. Lance
Pv13.564,Thaleichthys pacificus,,", ",M. Lance
Pv13.564,Thaleichthys pacificus,,", ",M. Lance
Pv13.564,Citharichthys stigmaeus,,", ",M. Lance
Pv13.564,Citharichthys stigmaeus,,", ",M. Lance
Pv13.564,Citharichthys stigmaeus,,", ",M. Lance
Pv13.565,Citharichthys stigmaeus,,", ",M. Lance
Pv13.565,Citharichthys stigmaeus,,", ",M. Lance
Pv13.565,Citharichthys stigmaeus,,", ",M. Lance
Pv13.565,Gadid or Merluccid,,", ",M. Lance
Pv13.566,Cyclopterid spp.,,", ",M. Lance
Pv13.566,Cyclopterid spp.,,", ",M. Lance
Pv13.566,Citharichthys stigmaeus,,", ",M. Lance
Pv13.566,Citharichthys stigmaeus,,", ",M. Lance
Pv13.566,Citharichthys stigmaeus,,", ",M. Lance
Pv13.567,Oncorhynchus spp.,,", ",M. Lance
Pv13.567,Citharichthys stigmaeus,,", ",M. Lance
Pv13.569,Citharichthys stigmaeus,,", ",M. Lance
Pv13.569,Citharichthys stigmaeus,,", ",M. Lance
Pv13.569,Citharichthys stigmaeus,,", ",M. Lance
Pv13.569,Citharichthys stigmaeus,,", ",M. Lance
Pv13.570,Citharichthys stigmaeus,,", ",M. Lance
Pv13.570,Citharichthys stigmaeus,,", ",M. Lance
Pv13.570,Citharichthys stigmaeus,,", ",M. Lance
Pv13.572,Oncorhynchus spp.,,", ",M. Lance
Pv13.572,Lampetra tridentata,,", ",M. Lance
Pv13.572,Cyclopterid spp.,,", ",M. Lance
Pv13.573,Thaleichthys pacificus,,", ",M. Lance
Pv13.573,Thaleichthys pacificus,,", ",M. Lance
Pv13.573,Thaleichthys pacificus,,", ",M. Lance
Pv13.573,Citharichthys stigmaeus,,", ",M. Lance
Pv13.573,Citharichthys stigmaeus,,", ",M. Lance
Pv13.573,Citharichthys stigmaeus,,", ",M. Lance
Pv13.574,Citharichthys stigmaeus,,", ",M. Lance
Pv13.574,Citharichthys stigmaeus,,", ",M. Lance
Pv13.574,Citharichthys stigmaeus,,", ",M. Lance
Pv13.575,Oncorhynchus spp.,,", ",M. Lance
Pv13.575,Oncorhynchus spp.,,", ",M. Lance
Pv13.576,Citharichthys stigmaeus,,", ",M. Lance
Pv13.576,Citharichthys stigmaeus,,", ",M. Lance
Pv13.576,Citharichthys stigmaeus,,", ",M. Lance
Pv13.578,Clupeid spp.,,", ",M. Lance
Pv13.579,Lampetra tridentata,,", ",M. Lance
Pv13.579,Lampetra tridentata,,", ",M. Lance
Pv13.579,Lampetra tridentata,,", ",M. Lance
Pv13.579,Unidentified flatfish,,", CRAB PCS",M. Lance
Pv13.580,Oncorhynchus spp.,,", ",M. Lance
Pv13.581,Citharichthys stigmaeus,,", ",M. Lance
Pv13.581,Citharichthys stigmaeus,,", ",M. Lance
Pv13.581,Citharichthys stigmaeus,,", ",M. Lance
Pv13.581,Cyclopterid spp.,,", ",M. Lance
Pv13.581,Cyclopterid spp.,,", ",M. Lance
Pv13.582,Diaphus theta,,", ",M. Lance
Pv13.582,Citharichthys stigmaeus,,", ",M. Lance
Pv13.582,Citharichthys stigmaeus,,", ",M. Lance
Pv13.582,Citharichthys stigmaeus,,", ",M. Lance
Pv13.582,Merluccius productus,,", ",M. Lance
Pv13.582,Merluccius productus,,", ",M. Lance
Pv13.582,Merluccius productus,,", ",M. Lance
Pv13.582,Labrid spp.,,", ",M. Lance
Pv13.583,Thaleichthys pacificus,,", ",M. Lance
Pv13.583,Thaleichthys pacificus,,", ",M. Lance
Pv13.583,Thaleichthys pacificus,,", ",M. Lance
Pv13.583,Unidentified flatfish,,", ",M. Lance
Pv13.583,Citharichthys stigmaeus,,", ",M. Lance
Pv13.583,Citharichthys stigmaeus,,", ",M. Lance
Pv13.584,Merluccius productus,,", ",M. Lance
Pv13.584,Merluccius productus,,", ",M. Lance
Pv13.584,Merluccius productus,,", ",M. Lance
Pv13.584,Labrid spp.,,", ",M. Lance
Pv13.584,Citharichthys stigmaeus,,", ",M. Lance
Pv13.584,Citharichthys stigmaeus,,", ",M. Lance
Pv13.585,Oncorhynchus spp.,,", ",M. Lance
Pv13.585,Oncorhynchus spp.,,", ",M. Lance
Pv13.586,Citharichthys stigmaeus,,", ",M. Lance
Pv13.587,Diaphus theta,,", 1 PEN",M. Lance
Pv13.587,Rhaochilus vacca,,", ",M. Lance
Pv13.587,Rhaochilus vacca,,", ",M. Lance
Pv13.587,Rhaochilus vacca,,", ",M. Lance
Pv13.587,Cyclopterid spp.,,", ",M. Lance
Pv13.587,Cyclopterid spp.,,", ",M. Lance
Pv13.587,Cyclopterid spp.,,", ",M. Lance
Pv13.587,Stichaeid spp.,,", ",M. Lance
Pv13.587,Stichaeid spp.,,", ",M. Lance
Pv13.587,Stichaeid spp.,,", ",M. Lance
Pv13.588,Lampetra tridentata,,", ",M. Lance
Pv13.588,Lampetra tridentata,,", ",M. Lance
Pv13.588,Lampetra tridentata,,", ",M. Lance
Pv13.588,Oncorhynchus spp.,,", ",M. Lance
Pv13.588,Cyclopterid spp.,,", ",M. Lance
Pv13.588,Cyclopterid spp.,,", ",M. Lance
Pv13.589,Citharichthys stigmaeus,,", ",M. Lance
Pv13.589,Citharichthys stigmaeus,,", ",M. Lance
Pv13.589,Citharichthys stigmaeus,,", ",M. Lance
Pv13.590,Citharichthys stigmaeus,,", ",M. Lance
Pv13.590,Citharichthys stigmaeus,,", ",M. Lance
Pv13.590,Citharichthys stigmaeus,,", ",M. Lance
Pv13.591,Cyclopterid spp.,,", ",M. Lance
Pv13.591,Cyclopterid spp.,,", ",M. Lance
Pv13.591,Cyclopterid spp.,,", ",M. Lance
Pv13.591,Citharichthys stigmaeus,,", ",M. Lance
Pv13.591,Citharichthys stigmaeus,,", ",M. Lance
Pv13.592,Citharichthys stigmaeus,,", ",M. Lance
Pv13.592,Citharichthys stigmaeus,,", ",M. Lance
Pv13.592,Citharichthys stigmaeus,,", ",M. Lance
Pv13.592,Thaleichthys pacificus,,", ",M. Lance
Pv13.593,Unidentified flatfish,,", CRAB PCS",M. Lance
Pv13.593,Citharichthys stigmaeus,,", ",M. Lance
Pv13.593,Citharichthys stigmaeus,,", ",M. Lance
Pv13.593,Thaleichthys pacificus,,", ",M. Lance
Pv13.593,Thaleichthys pacificus,,", ",M. Lance
Pv13.593,Thaleichthys pacificus,,", ",M. Lance
Pv13.593,Oncorhynchus spp.,,", ",M. Lance
Pv13.593,Lampetra tridentata,,", ",M. Lance
Pv13.593,Lampetra tridentata,,", ",M. Lance
Pv13.593,Lampetra tridentata,,", ",M. Lance
Pv13.593,Sebastes spp.,,", JUV",M. Lance
Pv13.593,Sebastes spp.,,", JUV",M. Lance
Pv13.593,Sebastes spp.,,", ",M. Lance
Pv13.594,Citharichthys stigmaeus,,", ",M. Lance
Pv13.595,Citharichthys stigmaeus,,", ",M. Lance
Pv13.596,Ommasteuthid spp.,,", AD",M. Lance
Pv13.596,Ommasteuthid spp.,,", AD",M. Lance
Pv13.596,Ommasteuthid spp.,,", ",M. Lance
Pv13.596,Citharichthys stigmaeus,,", ",M. Lance
Pv13.596,Citharichthys stigmaeus,,", ",M. Lance
Pv13.596,Citharichthys stigmaeus,,", ",M. Lance
Pv13.597,Oncorhynchus spp.,,", ",M. Lance
Pv13.597,Lampetra tridentata,,", ",M. Lance
Pv13.598,Lampetra tridentata,,", ",M. Lance
Pv13.598,Unidentified flatfish,,", CRAB PCS",M. Lance
Pv13.599,Oncorhynchus spp.,,", ",M. Lance
Pv13.599,Clupeid spp.,,", ",M. Lance
Pv13.600,Oncorhynchus spp.,,", ",M. Lance
Pv13.600,Lampetra tridentata,,", ",M. Lance
Pv13.600,Lampetra tridentata,,", ",M. Lance
Pv13.600,Lampetra tridentata,,", ",M. Lance
Pv13.600,Cyclopterid spp.,,", ",M. Lance
Pv13.600,Cyclopterid spp.,,", ",M. Lance
Pv13.600,Unidentified flatfish,,", CRAB PCS",M. Lance
Pv13.601,Thaleichthys pacificus,,", ",M. Lance
Pv13.601,Thaleichthys pacificus,,", ",M. Lance
Pv13.601,Thaleichthys pacificus,,", ",M. Lance
Pv13.601,Cyclopterid spp.,,", ",M. Lance
Pv13.601,Cyclopterid spp.,,", ",M. Lance
Pv13.601,Cyclopterid spp.,,", ",M. Lance
Pv13.601,Citharichthys stigmaeus,,", ",M. Lance
Pv13.601,Citharichthys stigmaeus,,", ",M. Lance
Pv13.601,Lampetra tridentata,,", ",M. Lance
Pv13.601,Lampetra tridentata,,", ",M. Lance
Pv13.601,Lampetra tridentata,,", ",M. Lance
Pv13.601,Unidentified flatfish,,", CRAB PCS",M. Lance
Pv13.602,Citharichthys stigmaeus,,", ",M. Lance
Pv13.602,Citharichthys stigmaeus,,", ",M. Lance
Pv13.602,Citharichthys stigmaeus,,", ",M. Lance
Pv13.603,Citharichthys stigmaeus,,", ",M. Lance
Pv13.603,Citharichthys stigmaeus,,", ",M. Lance
Pv13.603,Citharichthys stigmaeus,,", ",M. Lance
Pv13.604,Ommasteuthid spp.,,", ",M. Lance
Pv13.604,Ommasteuthid spp.,,", EGGS",M. Lance
Pv13.604,Oncorhynchus spp.,,", ONCSPP",M. Lance
Pv13.605,Citharichthys stigmaeus,,", ",M. Lance
Pv13.605,Citharichthys stigmaeus,,", ",M. Lance
Pv13.606,Oncorhynchus tshawytscha,Juvenile,", JUV, MNIB=1",M. Lance
Pv13.606,Lampetra tridentata,,", ",M. Lance
Pv13.606,Unidentified flatfish,,", CRAB PCS",M. Lance
Pv13.606,Sebastes spp.,,", JUV",M. Lance
Pv13.607,Lampetra tridentata,,", ",M. Lance
Pv13.607,Lampetra tridentata,,", ",M. Lance
Pv13.607,Lampetra tridentata,,", ",M. Lance
Pv13.607,Oncorhynchus tshawytscha,Juvenile,", JUV, MNIB=1",M. Lance
Pv13.607,Thaleichthys pacificus,,", ",M. Lance
Pv13.607,Thaleichthys pacificus,,", ",M. Lance
Pv13.607,Thaleichthys pacificus,,", ",M. Lance
Pv13.607,Citharichthys stigmaeus,,", ",M. Lance
Pv13.607,Citharichthys stigmaeus,,", ",M. Lance
Pv13.607,Citharichthys stigmaeus,,", ",M. Lance
Pv13.607,Cyclopterid spp.,,", ",M. Lance
Pv13.607,Cyclopterid spp.,,", ",M. Lance
Pv13.607,Cyclopterid spp.,,", ",M. Lance
Pv13.607,Sebastes spp.,,", JUV",M. Lance
Pv13.607,Sebastes spp.,,", JUV",M. Lance
Pv13.607,Sebastes spp.,,", ",M. Lance
Pv13.608,Citharichthys stigmaeus,,", ",M. Lance
Pv13.608,Citharichthys stigmaeus,,", ",M. Lance
Pv13.608,Oncorhynchus spp.,,", ",M. Lance
Pv13.608,Oncorhynchus spp.,,", ONCSPP - WW",M. Lance
Pv13.609,Citharichthys stigmaeus,,", ",M. Lance
Pv13.609,Citharichthys stigmaeus,,", ",M. Lance
Pv13.609,Oncorhynchus spp.,,", EGGS, SCALES",M. Lance
Pv13.610,Oncorhynchus spp.,Adult,", LG PCS",M. Lance
Pv13.611,Bathylagid spp.,,", ",M. Lance
Pv13.611,Bathylagid spp.,,", ",M. Lance
Pv13.611,Bathylagid spp.,,", ",M. Lance
Pv13.612,Citharichthys stigmaeus,,", ",M. Lance
Pv13.612,Citharichthys stigmaeus,,", ",M. Lance
Pv13.612,Ommasteuthid spp.,,", JUV",M. Lance
Pv13.613,Clupeid spp.,,", ",M. Lance
Pv13.613,Oncorhynchus spp.,,", EGGS, SCALES",M. Lance
Pv13.614,Citharichthys stigmaeus,,", ",M. Lance
Pv13.614,Citharichthys stigmaeus,,", ",M. Lance
Pv13.614,Citharichthys stigmaeus,,", ",M. Lance
Pv13.615,Citharichthys stigmaeus,,", ",M. Lance
Pv13.615,Citharichthys stigmaeus,,", ",M. Lance
Pv13.615,Citharichthys stigmaeus,,", ",M. Lance
Pv13.616,Citharichthys stigmaeus,,", ",M. Lance
Pv13.617,Oncorhynchus spp.,,", EGGS",M. Lance
Pv13.618,Citharichthys stigmaeus,,", ",M. Lance
Pv13.618,Citharichthys stigmaeus,,", ",M. Lance
Pv13.618,Citharichthys stigmaeus,,", ",M. Lance
Pv13.618,Ommasteuthid spp.,,", ",M. Lance
Pv13.618,Ommasteuthid spp.,,", ",M. Lance
Pv13.618,Unidentified flatfish,,", cf BERMAG, gonatid squid statoliths",M. Lance
Pv13.619,Citharichthys stigmaeus,,", ",M. Lance
Pv13.619,Oncorhynchus spp.,,", EGGS",M. Lance
Pv13.620,Citharichthys stigmaeus,,", ",M. Lance
Pv13.621,Clupeid spp.,,", ",M. Lance
Pv13.621,Oncorhynchus spp.,,", EGGS, SCALES",M. Lance
Pv13.622,Ommasteuthid spp.,,", JUV",M. Lance
Pv13.622,Ommasteuthid spp.,,", JUV",M. Lance
Pv13.622,Ommasteuthid spp.,,", JUV",M. Lance
Pv13.622,Oncorhynchus tshawytscha,Juvenile,", JUV",M. Lance
Pv13.622,Citharichthys stigmaeus,,", ",M. Lance
Pv13.622,Citharichthys stigmaeus,,", ",M. Lance
Pv13.622,Citharichthys stigmaeus,,", ",M. Lance
Pv13.623,Oncorhynchus spp.,,", EGGS. SCALES",M. Lance
Pv13.623,Clupeid spp.,,", ",M. Lance
Pv13.624,Citharichthys stigmaeus,,", ",M. Lance
Pv13.625,Oncorhynchus spp.,Adult,", AD",M. Lance
Pv13.625,Oncorhynchus tshawytscha,Juvenile,", 2 SMALL VTS",M. Lance
Pv13.626,Thaleichthys pacificus,,", ",M. Lance
Pv13.626,Thaleichthys pacificus,,", ",M. Lance
Pv13.627,Citharichthys stigmaeus,,", ",M. Lance
Pv13.627,Citharichthys stigmaeus,,", ",M. Lance
Pv13.628,Citharichthys stigmaeus,,", ",M. Lance
Pv13.629,Citharichthys stigmaeus,,", ",M. Lance
Pv13.629,Unidentified flatfish,,", 2 small pieces, no ID",M. Lance
Pv13.629,Unidentified flatfish,,", ",M. Lance
Pv13.630,Merluccius productus,,", ",M. Lance
Pv13.631,Citharichthys stigmaeus,,", ",M. Lance
Pv13.631,Citharichthys stigmaeus,,", ",M. Lance
Pv13.631,Citharichthys stigmaeus,,", ",M. Lance
Pv13.632,Oncorhynchus spp.,,", ",M. Lance
Pv13.633,Merluccius productus,,", ",M. Lance
Pv13.633,Merluccius productus,,", ",M. Lance
Pv13.633,Merluccius productus,,", ",M. Lance
Pv13.634,Gadid or Merluccid,,", ",M. Lance
Pv13.634,Unidentified flatfish,,", dried",M. Lance
Pv13.635,Myxinid species,,", poss salmon, too eroded",M. Lance
Pv13.636,Oncorhynchus spp.,,", eggs+",M. Lance
Pv13.637,Oncorhynchus spp.,,", ",M. Lance
Pv13.638,Merluccius productus,,", ",M. Lance
Pv13.638,Citharichthys stigmaeus,,", ",M. Lance
Pv13.638,Citharichthys stigmaeus,,", ",M. Lance
Pv13.638,Labrid spp.,,", ",M. Lance
Pv13.639,Merluccius productus,,", ",M. Lance
Pv13.639,Merluccius productus,,", ",M. Lance
Pv13.639,Merluccius productus,,", ",M. Lance
Pv13.639,Cyclopterid spp.,,", ",M. Lance
Pv13.640,Merluccius productus,,", ",M. Lance
Pv13.641,Merluccius productus,,", ",M. Lance
Pv13.641,Merluccius productus,,", ",M. Lance
Pv13.642,Merluccius productus,,", ",M. Lance
Pv13.642,Merluccius productus,,", ",M. Lance
Pv13.642,Oncorhynchus spp.,,", ",M. Lance
Pv13.642,Unidentified flatfish,,", ",M. Lance
Pv13.643,Gadid or Merluccid,,", ",M. Lance
Pv13.644,Oncorhynchus spp.,Juvenile,", small, not smolt",M. Lance
Pv13.645,Merluccius productus,,", ",M. Lance
Pv13.645,Merluccius productus,,", ",M. Lance
Pv14.001,Clupea pallasi,,", ",S. Crockford
Pv14.002,Clupea pallasi,,", ",S. Crockford
Pv14.003,Clupea pallasi,,", ",S. Crockford
Pv14.004,Squid sp.,,", ",S. Crockford
Pv14.004,Ammodytes hexapterus,,", ",S. Crockford
Pv14.004,Clupea pallasi,,", ",S. Crockford
Pv14.005,Clupea pallasi,,", ",S. Crockford
Pv14.005,Merluccius productus,,", ",S. Crockford
Pv14.006,Merluccius productus,,", ",S. Crockford
Pv14.006,Gadus chalcogramma,,", ",S. Crockford
Pv14.007,Merluccius productus,,", ",S. Crockford
Pv14.007,Gadus chalcogramma,,", ",S. Crockford
Pv14.007,Gadus macrocephalus,,", ",S. Crockford
Pv14.008,Gadus chalcogramma,,", ",S. Crockford
Pv14.008,Clupea pallasi,,", ",S. Crockford
Pv14.009,Merluccius productus,,", ",S. Crockford
Pv14.010,Gadus chalcogramma,,", ",S. Crockford
Pv14.010,Gadus macrocephalus,,", ",S. Crockford
Pv14.012,Cymatogaster gracilis,,", ",S. Crockford
Pv14.012,Oncorhynchus sp.,Juvenile,"Juv, ",S. Crockford
Pv14.012,Squid sp.,,", plus some broken bits",S. Crockford
Pv14.013,Clupea pallasi,,", ",S. Crockford
Pv14.015,Squid sp.,,", ",S. Crockford
Pv14.015,Clupea pallasi,,", ",S. Crockford
Pv14.016,Pholididae,,", ",S. Crockford
Pv14.016,Porichthys notatus,,", ",S. Crockford
Pv14.016,Leptocottus armatus,,", ",S. Crockford
Pv14.017,Platichthys stellatus,,", ",S. Crockford
Pv14.017,Porichthys notatus,,", ",S. Crockford
Pv14.018,Clupea pallasi,,", a few may be small",S. Crockford
Pv14.018,Squid sp.,,", ",S. Crockford
Pv14.021,Clupea pallasi,,", ",S. Crockford
Pv14.021,Gadus chalcogramma,,", ",S. Crockford
Pv14.022,Merluccius productus,,", ",S. Crockford
Pv14.022,Oncorhynchus sp.,Adult,"Adult, ",S. Crockford
Pv14.022,Porichthys notatus,,", ",S. Crockford
Pv14.022,Clupea pallasi,,", ",S. Crockford
Pv14.022,Gadus chalcogramma,,", ",S. Crockford
Pv14.023,Gadus chalcogramma,,", ",S. Crockford
Pv14.024,Squid sp.,,", ",S. Crockford
Pv14.025,Clupea pallasi,,", ",S. Crockford
Pv14.026,Clupea pallasi,,", ",S. Crockford
Pv14.026,Gadus chalcogramma,,", ",S. Crockford
Pv14.027,Pisces,,", could be herring",S. Crockford
Pv14.028,Lumpenus sagitta,,", ",S. Crockford
Pv14.029,Porichthys notatus,,", ",S. Crockford
Pv14.031,Clupea pallasi,,", ",S. Crockford
Pv14.031,Squid sp.,,", ",S. Crockford
Pv14.032,Squid sp.,,", ",S. Crockford
Pv14.033,Clupea pallasi,,", ",S. Crockford
Pv14.034,Merluccius productus,,", ",S. Crockford
Pv14.035,Merluccius productus,,", ",S. Crockford
Pv14.036,Merluccius productus,,", ",S. Crockford
Pv14.037,Merluccius productus,,", ",S. Crockford
Pv14.037,Squid sp.,,", ",S. Crockford
Pv14.037,Octopus sp.,,", ",S. Crockford
Pv14.038,Clupea pallasi,,", ",S. Crockford
Pv14.038,Merluccius productus,,", ",S. Crockford
Pv14.038,Gadus chalcogramma,,", ",S. Crockford
Pv14.039,Merluccius productus,,", ",S. Crockford
Pv14.040,Porichthys notatus,,", ",S. Crockford
Pv14.041,Merluccius productus,,", ",S. Crockford
Pv14.041,Hexagrammmos sp.,,", bottom 2/3 rds, in good shape otherwise",S. Crockford
Pv14.041,Gasterosteus aculaeatus,,", ",S. Crockford
Pv14.042,Clupea pallasi,,", ",S. Crockford
Pv14.043,Gasterosteus aculaeatus,,", ",S. Crockford
Pv14.043,Pholididae,,", ",S. Crockford
Pv14.043,Porichthys notatus,,", ",S. Crockford
Pv14.044,Clupea pallasi,,", ",S. Crockford
Pv14.046,Clupea pallasi,,", ",S. Crockford
Pv14.047,Clupea pallasi,,", ",S. Crockford
Pv14.047,Merluccius productus,,", ",S. Crockford
Pv14.048,Platichthys stellatus,,", ",S. Crockford
Pv14.049,Clupea pallasi,,", ",S. Crockford
Pv14.049,Gadus chalcogramma,,", ",S. Crockford
Pv14.050,Clupea pallasi,,", ",S. Crockford
Pv14.051,Oncorhynchus sp.,Adult,"Adult, ",S. Crockford
Pv14.051,Clupea pallasi,,", ",S. Crockford
Pv14.051,Gadus chalcogramma,,", ",S. Crockford
Pv14.052,Gadus sp.,,", ",S. Crockford
Pv14.052,Clupea pallasi,,", a few may be small",S. Crockford
Pv14.053,Oncorhynchus sp.,Adult,"Adult, ",S. Crockford
Pv14.053,Clupea pallasi,,", ",S. Crockford
Pv14.055,Clupea pallasi,,", ",S. Crockford
Pv14.056,Clupea pallasi,,", ",S. Crockford
Pv14.057,Porichthys notatus,,", ",S. Crockford
Pv14.058,Gadus chalcogramma,,", ",S. Crockford
Pv14.059,Porichthys notatus,,", ",S. Crockford
Pv14.059,Squid sp.,,", probably more, matrix to compact for an accurate count",S. Crockford
Pv14.060,Merluccius productus,,", most are broken",S. Crockford
Pv14.061,Merluccius productus,,", ",S. Crockford
Pv14.061,Cymatogaster gracilis,,", only one bone",S. Crockford
Pv14.061,Clupea pallasi,,", ",S. Crockford
Pv14.061,Lampetra tridentata,,", Diagnostic",S. Crockford
Pv14.062,Lycodes pacificus,,", most like this sp; def. not snake prickleback",S. Crockford
Pv14.063,Clupea pallasi,,", ",S. Crockford
Pv14.063,Squid sp.,,", ",S. Crockford
Pv14.063,Oncorhynchus sp.,Both,"Both, ",S. Crockford
Pv14.063,Gadus sp.,,", ",S. Crockford
Pv14.064,Gadus chalcogramma,,", ",S. Crockford
Pv14.065,Merluccius productus,,", ",S. Crockford
Pv14.066,Platichthys stellatus,,", ",S. Crockford
Pv14.067,Gadus chalcogramma,,", ",S. Crockford
Pv14.067,Clupea pallasi,,", ",S. Crockford
Pv14.068,Clupea pallasi,,", ",S. Crockford
Pv14.069,Pisces (none of the above),,", something bigger, could be larger pollock",S. Crockford
Pv14.069,Gadus chalcogramma,,", ",S. Crockford
Pv14.069,Clupea pallasi,,", ",S. Crockford
Pv14.070,Leptocottus armatus,,", ",S. Crockford
Pv14.070,Gadus chalcogramma,,", ",S. Crockford
Pv14.071,Merluccius productus,,", ",S. Crockford
Pv14.071,Clupea pallasi,,", ",S. Crockford
Pv14.071,Squid sp.,,", ",S. Crockford
Pv14.072,Clupea pallasi,,", ",S. Crockford
Pv14.072,Merluccius productus,,", ",S. Crockford
Pv14.073,Clupea pallasi,,", ",S. Crockford
Pv14.073,Merluccius productus,,", ",S. Crockford
Pv14.073,Lampetra tridentata,,", Diagnostic",S. Crockford
Pv14.074,Leptocottus armatus,,", ",S. Crockford
Pv14.074,Clupea pallasi,,", ",S. Crockford
Pv14.074,Gadus chalcogramma,,", ",S. Crockford
Pv14.077,Cymatogaster gracilis,,", ",S. Crockford
Pv14.077,Clupea pallasi,,", ",S. Crockford
Pv14.078,Cymatogaster gracilis,,", ",S. Crockford
Pv14.078,Pholididae,,", ",S. Crockford
Pv14.078,Aulorhynchus flavidus,,", ",S. Crockford
Pv14.078,Leptocottus armatus,,", ",S. Crockford
Pv14.078,Clupea pallasi,,", ",S. Crockford
Pv14.079,Squid sp.,,", ",S. Crockford
Pv14.079,Clupea pallasi,,", a few ""small"" may actually be vsm",S. Crockford
Pv14.080,Sebastes sp.,,", ",S. Crockford
Pv14.081,Gadus chalcogramma,,", ",S. Crockford
Pv14.081,Porichthys notatus,,", ",S. Crockford
Pv14.082,Cymatogaster gracilis,,", ",S. Crockford
Pv14.082,Clupea pallasi,,", ",S. Crockford
Pv14.083,Leptocottus armatus,,", ",S. Crockford
Pv14.083,Gasterosteus aculaeatus,,", ",S. Crockford
Pv14.084,Clupea pallasi,,", ",S. Crockford
Pv14.084,Porichthys notatus,,", ",S. Crockford
Pv14.084,Gadus chalcogramma,,", ",S. Crockford
Pv14.085,Oncorhynchus sp.,Adult,"Adult, ",S. Crockford
Pv14.086,Cymatogaster gracilis,,", ",S. Crockford
Pv14.086,Clupea pallasi,,", ",S. Crockford
Pv14.087,Oncorhynchus sp.,Adult,"Adult, ",S. Crockford
Pv14.087,Clupea pallasi,,", ",S. Crockford
Pv14.088,Clupea pallasi,,", ",S. Crockford
Pv14.089,Trichodon trichodon,,", ",S. Crockford
Pv14.089,Gadus chalcogramma,,", ",S. Crockford
Pv14.089,Oncorhynchus sp.,Both,"Both, ",S. Crockford
Pv14.089,Lampetra ayresii,,", diagnostic",S. Crockford
Pv14.089,Ammodytes hexapterus,,", ",S. Crockford
Pv14.089,Clupea pallasi,,", ",S. Crockford
Pv14.090,Gadidae,,", ",S. Crockford
Pv14.090,Lampetra ayresii,,", diagnostic",S. Crockford
Pv14.090,Merluccius productus,,", ",S. Crockford
Pv14.091,Engraulis mordax,,", ",S. Crockford
Pv14.091,Spirinchus starksi,,", def NOT capelin or eulachon, nor surf smelt",S. Crockford
Pv14.091,Gadus chalcogramma,,", ",S. Crockford
Pv14.091,Clupea pallasi,,", several individuals have fused vertebrae - more than usual for a random sample like this?",S. Crockford
Pv14.092,Clupea pallasi,,", ",S. Crockford
Pv14.092,Gadus sp.,,", ",S. Crockford
Pv14.092,Merluccius productus,,", ",S. Crockford
Pv14.092,Oncorhynchus sp.,Both,"Both, ",S. Crockford
Pv14.093,Oncorhynchus sp.,Juvenile,"Juv, ",S. Crockford
Pv14.093,Gadus chalcogramma,,", ",S. Crockford
Pv14.093,Clupea pallasi,,", ",S. Crockford
Pv14.095,Clupea pallasi,,", a few may be small",S. Crockford
Pv14.095,Gadus sp.,,", ",S. Crockford
Pv14.096,Merluccius productus,,", ",S. Crockford
Pv14.096,Squid sp.,,", ",S. Crockford
Pv14.097,Merluccius productus,,", ",S. Crockford
Pv14.098,Clupea pallasi,,", ",S. Crockford
Pv14.099,Clupea pallasi,,", ",S. Crockford
Pv14.099,Glyptocephalus zachirus,,", ",S. Crockford
Pv14.099,Gadus chalcogramma,,", ",S. Crockford
Pv14.100,Merluccius productus,,", ",S. Crockford
Pv14.100,Clupea pallasi,,", ",S. Crockford
Pv14.101,Pleuronectiformes,,", ",S. Crockford
Pv14.101,Cymatogaster gracilis,,", Looks more like river otter scat to me, full of rock crab and chewed up bone",S. Crockford
Pv14.101,Leptocottus armatus,,", many are chewed",S. Crockford
Pv14.101,Pholididae,,", ",S. Crockford
Pv14.102,Clupea pallasi,,", ",S. Crockford
Pv14.102,Squid sp.,,", ",S. Crockford
Pv14.102,Lampetra ayresii,,", diagnostic  teeth",S. Crockford
Pv14.103,Merluccius productus,,", ",S. Crockford
Pv14.104,Cymatogaster gracilis,,", ",S. Crockford
Pv14.104,Gasterosteus aculaeatus,,", ",S. Crockford
Pv14.104,Pholididae,,", ",S. Crockford
Pv14.104,Nereis polycaete,,", ",S. Crockford
Pv14.104,Leptocottus armatus,,", looks more like river otter scat, chewed bone, crab",S. Crockford
Pv14.105,Merluccius productus,,", ",S. Crockford
Pv14.105,Clupea pallasi,,", ",S. Crockford
Pv14.105,Squid sp.,,", ",S. Crockford
Pv14.105,Lampetra ayresii,,", diagnostic",S. Crockford
Pv14.106,Clupea pallasi,,", ",S. Crockford
Pv14.106,Merluccius productus,,", ",S. Crockford
Pv14.107,Pisces,,", ",S. Crockford
Pv14.108,Pisces,,", ",S. Crockford
Pv14.109,Clupea pallasi,,", ",S. Crockford
Pv14.110,Cymatogaster gracilis,,", ",S. Crockford
Pv14.110,Clupea pallasi,,", ",S. Crockford
Pv14.111,Clupea pallasi,,", ",S. Crockford
Pv14.111,Gadus chalcogramma,,", ",S. Crockford
Pv14.112,Clupea pallasi,,", ",S. Crockford
Pv14.112,Lampetra ayresii,,", diagnostic",S. Crockford
Pv14.112,Merluccius productus,,", ",S. Crockford
Pv14.113,Merluccius productus,,", ",S. Crockford
Pv14.113,Clupea pallasi,,", ",S. Crockford
Pv14.113,Gadus chalcogramma,,", ",S. Crockford
Pv14.114,Cymatogaster gracilis,,", ",S. Crockford
Pv14.114,Gadus chalcogramma,,", ",S. Crockford
Pv14.114,Leptocottus armatus,,", ",S. Crockford
Pv14.114,Clupea pallasi,,", ",S. Crockford
Pv14.115,Clupea pallasi,,", ",S. Crockford
Pv14.115,Gadus chalcogramma,,", ",S. Crockford
Pv14.115,Merluccius productus,,", ",S. Crockford
Pv14.117,Leptocottus armatus,,", ",S. Crockford
Pv14.117,Cymatogaster gracilis,,", ",S. Crockford
Pv14.117,Pisces (none of above 1),,", cold be gunnel",S. Crockford
Pv14.117,Nereis polycaete,,", ",S. Crockford
Pv14.118,Clupea pallasi,,", ",S. Crockford
Pv14.118,Engraulis mordax,,", most like anchovy but no anchovy bone",S. Crockford
Pv14.119,Pleuronectiformes,,", ",S. Crockford
Pv14.120,Clupea pallasi,,", ",S. Crockford
Pv14.120,Gadus chalcogramma,,", ",S. Crockford
Pv14.121,Cymatogaster gracilis,,", ",S. Crockford
Pv14.121,Lampetra ayresii,,", diagnostic",S. Crockford
Pv14.122,Merluccius productus,,", ",S. Crockford
Pv14.123,Ammodytes hexapterus,,", jar says ""9/14"" list says ""9/4""",S. Crockford
Pv14.123,Cymatogaster gracilis,,", ",S. Crockford
Pv14.123,Clupea pallasi,,", ",S. Crockford
Pv14.124,Clupea pallasi,,", ",S. Crockford
Pv14.124,Hexagrammmos sp.,,", ",S. Crockford
Pv14.124,Oncorhynchus sp.,Adult,"Adult, ",S. Crockford
Pv14.124,Eunoe polycaete,,", ",S. Crockford
Pv14.125,Leptocottus armatus,,", ",S. Crockford
Pv14.125,Nereis polycaete,,", ",S. Crockford
Pv14.125,Cymatogaster gracilis,,", ",S. Crockford
Pv14.126,Squid sp.,,", ",S. Crockford
Pv14.126,Clupea pallasi,,", ",S. Crockford
Pv14.126,Merluccius productus,,", ",S. Crockford
Pv14.127,Lampetra tridentata,,", diagnostic",S. Crockford
Pv14.127,Squid sp.,,", ",S. Crockford
Pv14.127,Gadus chalcogramma,,", ",S. Crockford
Pv14.128,Clupea pallasi,,", ",S. Crockford
Pv14.128,Lumpenus sagitta,,", ",S. Crockford
Pv14.128,Leptocottus armatus,,", ",S. Crockford
Pv14.128,Nereis polycaete,,", ",S. Crockford
Pv14.129,Clupea pallasi,,", ",S. Crockford
Pv14.130,Clupea pallasi,,", ",S. Crockford
Pv14.130,Oncorhynchus sp.,Juvenile,"Juv, ",S. Crockford
Pv14.131,Oncorhynchus sp.,Juvenile,"Juv, ",S. Crockford
Pv14.131,Gadus chalcogramma,,", ",S. Crockford
Pv14.131,Clupea pallasi,,", ",S. Crockford
Pv14.132,Clupea pallasi,,", ",S. Crockford
Pv14.133,Cymatogaster gracilis,,", 6 lg indivds based on pharyngeal plates, 2 based on otos",S. Crockford
Pv14.133,Clupea pallasi,,", ",S. Crockford
Pv14.133,Squid sp.,,", ",S. Crockford
Pv14.133,Polycaete worm,,", ",S. Crockford
Pv14.133,Enophrys bison,,", ",S. Crockford
Pv14.133,Leptocottus armatus,,", ",S. Crockford
Pv14.134,Oncorhynchus sp.,Both,"Both, ",S. Crockford
Pv14.134,Clupea pallasi,,", ",S. Crockford
Pv14.135,Leptocottus armatus,,", could be another sculpin",S. Crockford
Pv14.135,Clupea pallasi,,", ",S. Crockford
Pv14.135,Gadus chalcogramma,,", ",S. Crockford
Pv14.135,Oncorhynchus sp.,Juvenile,"Juv, ",S. Crockford
Pv14.136,Cymatogaster gracilis,,", ",S. Crockford
Pv14.137,Cymatogaster gracilis,,", ",S. Crockford
Pv14.138,Hexagrammmos sp.,,", ",S. Crockford
Pv14.138,Clupea pallasi,,", ",S. Crockford
Pv14.138,Leptocottus armatus,,", ",S. Crockford
Pv14.139,Osmeridae,,", could be night smelt or longfin",S. Crockford
Pv14.139,Pisces (none of the above),,", definitely bigger",S. Crockford
Pv14.139,Clupea pallasi,,", ",S. Crockford
Pv14.140,Anoplopoma fimbria,,", ",S. Crockford
Pv14.140,Gadus chalcogramma,,", ",S. Crockford
Pv14.141,Oncorhynchus sp.,Adult,"Adult, ",S. Crockford
Pv14.141,Polycaete worm,,", ",S. Crockford
Pv14.142,Gadus chalcogramma,,", ",S. Crockford
Pv14.143,Clupea pallasi,,", ",S. Crockford
Pv14.145,Leptocottus armatus,,", ",S. Crockford
Pv14.145,Squid sp.,,", ",S. Crockford
Pv14.145,Octopus sp.,,", ",S. Crockford
Pv14.145,Damalichthys vacca,,", could also be striped seaperch",S. Crockford
Pv14.145,Cymatogaster gracilis,,", ",S. Crockford
Pv14.145,Oncorhynchus sp.,Adult,"Adult, ",S. Crockford
Pv14.145,Hexagrammmos sp.,,", ",S. Crockford
Pv14.146,Gadus chalcogramma,,", ",S. Crockford
Pv14.147,Merluccius productus,,", ",S. Crockford
Pv14.147,Squid/Octopus,,", ",S. Crockford
Pv14.148,Oncorhynchus sp.,Adult,"Adult, ",S. Crockford
Pv14.149,Cymatogaster gracilis,,", ",S. Crockford
Pv14.149,Clupea pallasi,,", ",S. Crockford
Pv14.150,Spirinchus starksi,,", oto is def not eulachon and not really like longfin; not robust enough to be surf smelt - however we don't have a nightsmelt in our collection",S. Crockford
Pv14.150,Clupea pallasi,,", ",S. Crockford
Pv14.151,Lampetra ayresii,,", diagnostic",S. Crockford
Pv14.151,Merluccius productus,,", ",S. Crockford
Pv14.151,Clupea pallasi,,", ",S. Crockford
Pv14.152,Clupea pallasi,,", ",S. Crockford
Pv14.152,Leptocottus armatus,,", ",S. Crockford
Pv14.153,Clupea pallasi,,", ",S. Crockford
Pv14.153,Cymatogaster gracilis,,", one extra vial added; date on vials says ""10/11"" but on list says ""10/1/2014""",S. Crockford
Pv14.154,Clupea pallasi,,", ",S. Crockford
Pv14.154,Pisces (none of the above),,", could be salmon?",S. Crockford
Pv14.155,Platichthys stellatus,,", ",S. Crockford
Pv14.156,Gadus chalcogramma,,", ",S. Crockford
Pv14.156,Squid sp.,,", ",S. Crockford
Pv14.157,Merluccius productus,,", ",S. Crockford
Pv14.158,Sebastes sp.,,", ",S. Crockford
Pv14.158,Clupea pallasi,,", ",S. Crockford
Pv14.159,Hemilepidotus sp.,,", ",S. Crockford
Pv14.159,Clupea pallasi,,", ",S. Crockford
Pv14.159,Leptocottus armatus,,", ",S. Crockford
Pv14.160,Platichthys stellatus,,", ",S. Crockford
Pv14.160,Leptocottus armatus,,", ",S. Crockford
Pv14.161,Cymatogaster gracilis,,", 53",S. Crockford
Pv14.162,Cymatogaster gracilis,,", ",S. Crockford
Pv14.162,Clupea pallasi,,", ",S. Crockford
Pv14.162,Ammodytes hexapterus,,", ",S. Crockford
Pv14.162,Squid sp.,,", ",S. Crockford
Pv14.163,Oncorhynchus sp.,Juvenile,"Juv, verts are vsm",S. Crockford
Pv14.163,Clupea pallasi,,", ",S. Crockford
Pv14.164,Merluccius productus,,", ",S. Crockford
Pv14.164,Clupea pallasi,,", ",S. Crockford
Pv14.165,Cymatogaster gracilis,,", ",S. Crockford
Pv14.165,Clupea pallasi,,", ",S. Crockford
Pv14.165,Leptocottus armatus,,", ",S. Crockford
Pv14.166,Oncorhynchus sp.,Adult,"Adult, most like salmon but could be something else, def. another species",S. Crockford
Pv14.166,Leptocottus armatus,,", ",S. Crockford
Pv14.166,Clupea pallasi,,", ",S. Crockford
Pv14.166,Squid sp.,,", ",S. Crockford
Pv14.167,Clupea pallasi,,", ",S. Crockford
Pv14.167,Cymatogaster gracilis,,", ",S. Crockford
Pv14.168,Cymatogaster gracilis,,", ",S. Crockford
Pv14.168,Oncorhynchus sp.,Adult,"Adult, ",S. Crockford
Pv14.168,Clupea pallasi,,", ",S. Crockford
Pv14.169,Clupea pallasi,,", ",S. Crockford
Pv14.169,Cymatogaster gracilis,,", ",S. Crockford
Pv14.170,Pisces,,", not herring or pollock",S. Crockford
Pv14.170,Gadus chalcogramma,,", ",S. Crockford
Pv14.170,Clupea pallasi,,", ",S. Crockford
Pv14.171,Clupea pallasi,,", ",S. Crockford
Pv14.171,Hexagrammmos sp.,,", ",S. Crockford
Pv14.171,Cymatogaster gracilis,,", ",S. Crockford
Pv14.172,Cymatogaster gracilis,,", ",S. Crockford
Pv14.172,Leptocottus armatus,,", ",S. Crockford
Pv14.172,Nereis polycaete,,", ",S. Crockford
Pv14.174,Cymatogaster gracilis,,", ",S. Crockford
Pv14.174,Clupea pallasi,,", ",S. Crockford
Pv14.175,Gadus chalcogramma,,", ",S. Crockford
Pv14.175,Merluccius productus,,", ",S. Crockford
Pv14.175,Atheresthes stomias,,", ",S. Crockford
Pv14.176,Merluccius productus,,", ",S. Crockford
Pv14.177,Merluccius productus,,", ",S. Crockford
Pv14.178,Oncorhynchus sp.,Adult,"Adult, ",S. Crockford
Pv14.179,Clupea pallasi,,", ",S. Crockford
Pv14.179,Cymatogaster gracilis,,", ",S. Crockford
Pv14.179,Merluccius productus,,", ",S. Crockford
Pv14.180,Pisces,,", ",S. Crockford
Pv14.181,Octopus sp.,,", ",S. Crockford
Pv14.181,Merluccius productus,,", ",S. Crockford
Pv14.181,Clupea pallasi,,", ",S. Crockford
Pv14.182,Oncorhynchus sp.,Adult,"Adult, ",S. Crockford
Pv14.183,Merluccius productus,,", ",S. Crockford
Pv14.184,Squid sp.,,", ",S. Crockford
Pv14.184,Clupea pallasi,,", ",S. Crockford
Pv14.185,Merluccius productus,,", ",S. Crockford
Pv14.185,Squid/Octopus,,", ",S. Crockford
Pv14.185,Oncorhynchus sp.,Adult,"Adult, ",S. Crockford
Pv14.186,Oncorhynchus sp.,Adult,"Adult, ",S. Crockford
Pv14.187,Oncorhynchus sp.,Adult,"Adult, ",S. Crockford
Pv14.187,Merluccius productus,,", ",S. Crockford
Pv14.188,Oncorhynchus sp.,Adult,"Adult, ",S. Crockford
Pv14.189,Merluccius productus,,", ",S. Crockford
Pv14.190,Merluccius productus,,", ",S. Crockford
Pv14.191,Merluccius productus,,", ",S. Crockford
Pv14.192,Leptocottus armatus,,", ",S. Crockford
Pv14.192,Oncorhynchus sp.,Adult,"Adult, ",S. Crockford
Pv14.193,Gadus chalcogramma,,", ",S. Crockford
Pv14.193,Merluccius productus,,", ",S. Crockford
Pv14.194,Merluccius productus,,", ",S. Crockford
Pv14.194,Gadus chalcogramma,,", ",S. Crockford
Pv14.194,Clupea pallasi,,", ",S. Crockford
Pv14.195,Gadus chalcogramma,,", ",S. Crockford
Pv14.196,Merluccius productus,,", ",S. Crockford
Pv14.196,Squid/Octopus,,", ",S. Crockford
Pv14.196,Lampetra tridentata,,", diagnostic",S. Crockford
Pv14.197,Merluccius productus,,", ",S. Crockford
Pv14.198,Merluccius productus,,", ",S. Crockford
Pv14.199,Oncorhynchus sp.,Adult,"Adult, ",S. Crockford
Pv14.200,Clupea pallasi,,", ",S. Crockford
Pv14.201,Pisces,,", ",S. Crockford
Pv14.202,Clupea pallasi,,", ",S. Crockford
Pv14.202,Merluccius productus,,", ",S. Crockford
Pv14.203,Clupea pallasi,,", a few could be small",S. Crockford
Pv14.204,Gadus chalcogramma,,", ",S. Crockford
Pv14.204,Clupea pallasi,,", ",S. Crockford
Pv14.204,Porichthys notatus,,", ",S. Crockford
Pv14.204,Squid sp.,,", ",S. Crockford
Pv14.205,Clupea pallasi,,", ",S. Crockford
Pv14.205,Spirinchus starksi,,", ",S. Crockford
Pv14.206,Merluccius productus,,", ",S. Crockford
Pv14.206,Gadus chalcogramma,,", ",S. Crockford
Pv14.207,Leptocottus armatus,,", ",S. Crockford
Pv14.207,Clupea pallasi,,", ",S. Crockford
Pv14.207,Oncorhynchus sp.,Adult,"Adult, ",S. Crockford
Pv14.207,Pholididae,,", ",S. Crockford
Pv14.207,Lycodes pacificus,,", these are def not staghorn or rockfish",S. Crockford
Pv14.207,Raja sp.(unident),,", ",S. Crockford
Pv14.207,Pisces,,", ",S. Crockford
Pv14.207,Sebastes sp.,,", ",S. Crockford
Pv14.209,Cymatogaster gracilis,,", ",S. Crockford
Pv14.209,Oncorhynchus sp.,Both,"Both, ",S. Crockford
Pv14.209,Damalichthys vacca,,", def not shiner",S. Crockford
Pv14.209,Clupea pallasi,,", ",S. Crockford
Pv14.209,Merluccius productus,,", ",S. Crockford
Pv14.209,Leptocottus armatus,,", ",S. Crockford
Pv14.210,Oncorhynchus sp.,Adult,"Adult, ",S. Crockford
Pv14.211,Oncorhynchus sp.,Adult,"Adult, ",S. Crockford
Pv14.212,Oncorhynchus sp.,Juvenile,"Juv, ",S. Crockford
Pv14.212,Squid sp.,,", ",S. Crockford
Pv14.212,Clupea pallasi,,", ",S. Crockford
Pv14.212,Leptocottus armatus,,", ",S. Crockford
Pv14.212,Cymatogaster gracilis,,", ",S. Crockford
Pv14.212,Damalichthys vacca,,", ",S. Crockford
Pv14.213,Clupea pallasi,,", ",S. Crockford
Pv14.214,Clupea pallasi,,", ",S. Crockford
Pv14.215,Clupea pallasi,,", ",S. Crockford
Pv14.215,Oncorhynchus sp.,Adult,"Adult, ",S. Crockford
Pv14.216,Oncorhynchus sp.,Adult,"Adult, ",S. Crockford
Pv14.217,Pisces,,", ",S. Crockford
Pv14.218,Oncorhynchus sp.,Adult,"Adult, ",S. Crockford
Pv14.219,Oncorhynchus sp.,Adult,"Adult, ",S. Crockford
Pv14.220,Clupea pallasi,,", ",S. Crockford
Pv14.220,Oncorhynchus sp.,Adult,"Adult, ",S. Crockford
Pv14.221,Clupea pallasi,,", ",S. Crockford
Pv14.222,Clupea pallasi,,", ",S. Crockford
Pv14.222,Merluccius productus,,", ",S. Crockford
Pv14.222,Oncorhynchus sp.,Adult,"Adult, ",S. Crockford
Pv14.223,Merluccius productus,,", ",S. Crockford
Pv14.223,Clupea pallasi,,", ",S. Crockford
Pv14.224,Squid sp.,,", ",S. Crockford
Pv14.224,Gadus chalcogramma,,", ",S. Crockford
Pv14.224,Clupea pallasi,,", ",S. Crockford
Pv14.225,Oncorhynchus sp.,Adult,"Adult, ",S. Crockford
Pv14.226,Cymatogaster gracilis,,", ",S. Crockford
Pv14.226,Clupea pallasi,,", ",S. Crockford
Pv14.226,Oncorhynchus sp.,Adult,"Adult, ",S. Crockford
Pv14.227,Clupea pallasi,,", ",S. Crockford
Pv14.228,Anoplarchus purpurescens,,", ",S. Crockford
Pv14.228,Artedius fenestralis,,", close but not exact match, could be A. meanyi (Puget Sound sculpin)",S. Crockford
Pv14.228,Enophrys bison,,", ",S. Crockford
Pv14.228,Platichthys stellatus,,", ",S. Crockford
Pv14.229,Pisces,,", ",S. Crockford
Pv14.230,Oncorhynchus sp.,Adult,"Adult, ",S. Crockford
Pv14.231,Merluccius productus,,", ",S. Crockford
Pv14.233,Oncorhynchus sp.,Adult,"Adult, ",S. Crockford
Pv14.234,Oncorhynchus sp.,Adult,"Adult, ",S. Crockford
Pv14.234,Clupea pallasi,,", ",S. Crockford
Pv14.235,Clupea pallasi,,", ",S. Crockford
Pv14.236,Pisces,,", ",S. Crockford
Pv14.237,Oncorhynchus sp.,Adult,"Adult, ",S. Crockford
Pv14.238,Oncorhynchus sp.,Adult,"Adult, ",S. Crockford
Pv14.238,Clupea pallasi,,", ",S. Crockford
Pv14.239,Oncorhynchus sp.,Adult,"Adult, ",S. Crockford
Pv14.240,Oncorhynchus sp.,Adult,"Adult, ",S. Crockford
Pv14.241,Oncorhynchus sp.,Adult,"Adult, ",S. Crockford
Pv14.242,Clupea pallasi,,", ",S. Crockford
Pv14.242,Oncorhynchus sp.,Adult,"Adult, quite eroded but could be salmon",S. Crockford
Pv14.243,Platichthys stellatus,,", ",S. Crockford
Pv14.243,Platichthys stellatus,,", ",S. Crockford
Pv14.243,Oncorhynchus sp.,Adult,"Adult, ",S. Crockford
Pv14.243,Clupea pallasi,,", ",S. Crockford
Pv14.243,Leptocottus armatus,,", ",S. Crockford
Pv14.244,Oncorhynchus sp.,Adult,"Adult, ",S. Crockford
Pv14.245,Clupea pallasi,,", ",S. Crockford
Pv14.246,Clupea pallasi,,", ",S. Crockford
Pv14.247,Oncorhynchus sp.,Adult,"Adult, ",S. Crockford
Pv14.248,Clupea pallasi,,", ",S. Crockford
Pv14.249,Pisces,,", ",S. Crockford
Pv14.250,Pisces,,", ",S. Crockford
Pv14.251,Clupea pallasi,,", ",S. Crockford
Pv14.252,Clupea pallasi,,", ",S. Crockford
Pv14.252,Gadus chalcogramma,,", ",S. Crockford
Pv14.253,Oncorhynchus sp.,Adult,"Adult, ",S. Crockford
Pv14.254,Oncorhynchus sp.,Adult,"Adult, ",S. Crockford
Pv14.255,Oncorhynchus sp.,Adult,"Adult, eroded rim frag only but prob salmon",S. Crockford
Pv14.256,Oncorhynchus sp.,Adult,"Adult, ",S. Crockford
Pv14.256,Clupea pallasi,,", ",S. Crockford
Pv14.257,Clupea pallasi,,", ",S. Crockford
Pv14.258,Oncorhynchus sp.,Adult,"Adult, ",S. Crockford
Pv14.259,Clupea pallasi,,", ",S. Crockford
Pv14.260,Oncorhynchus sp.,Adult,"Adult, ",S. Crockford
Pv14.261,Oncorhynchus sp.,Adult,"Adult, ",S. Crockford
Pv14.262,Oncorhynchus sp.,Adult,"Adult, ",S. Crockford
Pv14.263,Oncorhynchus sp.,Adult,"Adult, ",S. Crockford
Pv14.264,Pisces,,", ",S. Crockford
Pv14.265,Cymatogaster gracilis,,", ",S. Crockford
Pv14.265,Hexagrammmos sp.,,", ",S. Crockford
Pv14.265,Eunoe polycaete,,", ",S. Crockford
Pv14.265,Nereis polycaete,,", ",S. Crockford
Pv14.265,Leptocottus armatus,,", ",S. Crockford
Pv14.266,Leptocottus armatus,,", ",S. Crockford
Pv14.267,Oncorhynchus sp.,Adult,"Adult, ",S. Crockford
Pv14.268,Clupea pallasi,,", ",S. Crockford
Pv14.269,Oncorhynchus sp.,Adult,"Adult, ",S. Crockford
Pv14.271,Clupea pallasi,,", ",S. Crockford
Pv14.272,Pisces,,", ",S. Crockford
Pv14.273,Cymatogaster gracilis,,", ",S. Crockford
Pv14.273,Gadus chalcogramma,,", ",S. Crockford
Pv14.274,Cymatogaster gracilis,,", ",S. Crockford
Pv14.274,Oncorhynchus sp.,Adult,"Adult, ",S. Crockford
Pv14.275,Pisces,,", ",S. Crockford
Pv14.276,Pisces,,", ",S. Crockford
Pv14.277,Pholididae,,", ",S. Crockford
Pv14.277,Leptocottus armatus,,", ",S. Crockford
Pv14.277,Oncorhynchus sp.,Adult,"Adult, ",S. Crockford
Pv14.277,Gasterosteus aculaeatus,,", ",S. Crockford
Pv14.277,Platichthys stellatus,,", more like starry than rock sole but could be either, prob < 5cm",S. Crockford
Pv14.277,Lepidopsetta sp.,,", scales and pharygeobranchials distinctive",S. Crockford
Pv14.277,Platichthys stellatus,,", distinctive",S. Crockford
Pv14.277,Artedius fenestralis,,", ",S. Crockford
Pv14.278,Platichthys stellatus,,", distinctive",S. Crockford
Pv14.279,Pisces,,", ",S. Crockford
Pv14.280,Gadus chalcogramma,,", ",S. Crockford
Pv14.280,Cymatogaster gracilis,,", ",S. Crockford
Pv14.281,Pisces,,", ",S. Crockford
Pv14.282,Pisces,,", ",S. Crockford
Pv14.283,Oncorhynchus sp.,Adult,"Adult, ",S. Crockford
Pv14.283,Clupea pallasi,,", ",S. Crockford
Pv14.285,Pisces,,", ",S. Crockford
Pv14.287,Oncorhynchus sp.,Adult,"Adult, ",S. Crockford
Pv14.288,Lumpenus sagitta,,", ",S. Crockford
Pv14.288,Oncorhynchus sp.,Adult,"Adult, ",S. Crockford
Pv14.288,Leptocottus armatus,,", ",S. Crockford
Pv14.288,Enophrys bison,,", ",S. Crockford
Pv14.288,Pholididae,,", ",S. Crockford
Pv14.288,Cymatogaster gracilis,,", ",S. Crockford
Pv14.288,Agonopsis vulsa,,", most like this species, could be another",S. Crockford
Pv14.288,Pleuronectiformes,,", could be starry also but not diagnostic",S. Crockford
Pv14.288,Platichthys stellatus,,", ",S. Crockford
Pv14.288,Gasterosteus aculaeatus,,", ",S. Crockford
Pv14.289,Clupea pallasi,,", ",S. Crockford
Pv14.290,Oncorhynchus sp.,Adult,"Adult, ",S. Crockford
Pv14.291,Oncorhynchus sp.,Adult,"Adult, ",S. Crockford
Pv16.001,Oncorhynchus tshawytscha,Adult,"sub-adult ?, Partial vertebrae only",M. Lance
Pv16.001,Oncorhynchus tshawytscha,Juvenile,"juvenile, Partial vertebrae only",M. Lance
Pv16.002,Clupeid spp.,,", ",M. Lance
Pv16.002,Engraulis mordax,,", ",M. Lance
Pv16.002,Engraulis mordax,,", ",M. Lance
Pv16.002,Cottid spp.,,", ",M. Lance
Pv16.002,Cottid spp.,,", ",M. Lance
Pv16.002,Cottid spp.,,", ",M. Lance
Pv16.003,Porichthys notatus,,", ",M. Lance
Pv16.003,Porichthys notatus,,", ",M. Lance
Pv16.003,Porichthys notatus,,", ",M. Lance
Pv16.003,Liparid spp.,,", ",M. Lance
Pv16.004,Ammodytes hexapteras,,", ",M. Lance
Pv16.004,Ammodytes hexapteras,,", ",M. Lance
Pv16.004,Leptocottus armatus,,", ",M. Lance
Pv16.004,Leptocottus armatus,,", ",M. Lance
Pv16.004,Leptocottus armatus,,", ",M. Lance
Pv16.004,Cottid spp.,,", preop not staghorn",M. Lance
Pv16.004,Doryteuthis opalescens,,", ",M. Lance
Pv16.004,Octopus rubescens,,", ",M. Lance
Pv16.005,Cymatogaster aggregata,,", ",M. Lance
Pv16.005,Cymatogaster aggregata,,", ",M. Lance
Pv16.006,Alosa sapidissima,,", ",M. Lance
Pv16.006,Alosa sapidissima,,", ",M. Lance
Pv16.007,Unidentifiable fish spp.,,", bits only",M. Lance
Pv16.008,Merluccius productus,,", ",M. Lance
Pv16.008,Merluccius productus,,", ",M. Lance
Pv16.008,Cymatogaster aggregata,,", ",M. Lance
Pv16.008,Cymatogaster aggregata,,", ",M. Lance
Pv16.008,Cymatogaster aggregata,,", ",M. Lance
Pv16.009,Liparid spp.,,", ",M. Lance
Pv16.009,Cottid spp.,,", ",M. Lance
Pv16.009,Clupeid spp.,,", ",M. Lance
Pv16.009,Gadid or Merluccid,,", ",M. Lance
Pv16.010,Leptocottus armatus,,", ",M. Lance
Pv16.010,Leptocottus armatus,,", ",M. Lance
Pv16.010,Leptocottus armatus,,", ",M. Lance
Pv16.010,Porichthys notatus,,", ",M. Lance
Pv16.010,Porichthys notatus,,", ",M. Lance
Pv16.010,Porichthys notatus,,", ",M. Lance
Pv16.010,Pleuronectes vetulus,,", ",M. Lance
Pv16.010,Pleuronectes vetulus,,", ",M. Lance
Pv16.010,Pleuronectes vetulus,,", ",M. Lance
Pv16.010,Merluccius productus,,", ",M. Lance
Pv16.010,Merluccius productus,,", ",M. Lance
Pv16.010,Merluccius productus,,", ",M. Lance
Pv16.010,Microgadus proximus,,", ",M. Lance
Pv16.010,Microgadus proximus,,", ",M. Lance
Pv16.010,Microgadus proximus,,", ",M. Lance
Pv16.011,Porichthys notatus,,", ",M. Lance
Pv16.011,Gadid or Merluccid,,", ",M. Lance
Pv16.013,Merluccius productus,,", ",M. Lance
Pv16.013,Merluccius productus,,", ",M. Lance
Pv16.013,Merluccius productus,,", ",M. Lance
Pv16.013,Microgadus proximus,,", ",M. Lance
Pv16.013,Microgadus proximus,,", ",M. Lance
Pv16.013,Leptocottus armatus,,", ",M. Lance
Pv16.013,Leptocottus armatus,,", ",M. Lance
Pv16.014,Oncorhynchus sp.,Adult,"Adult, Tentatve species id and age classification based on very large size and dentate condition of gillrakers of gillrakers",M. Lance
Pv16.015,Merluccius productus,,", ",M. Lance
Pv16.015,Merluccius productus,,", ",M. Lance
Pv16.015,Merluccius productus,,", ",M. Lance
Pv16.015,Cymatogaster aggregata,,", ",M. Lance
Pv16.016,Clupeid spp.,,", ",M. Lance
Pv16.016,Gadid or Merluccid,,", ",M. Lance
Pv16.016,Cymatogaster aggregata,,", ",M. Lance
Pv16.016,Cymatogaster aggregata,,", ",M. Lance
Pv16.016,Cymatogaster aggregata,,", ",M. Lance
Pv16.017,Leptocottus armatus,,", ",M. Lance
Pv16.017,Leptocottus armatus,,", ",M. Lance
Pv16.017,Rajid spp.,,", ",M. Lance
Pv16.017,Porichthys notatus,,", ",M. Lance
Pv16.017,Porichthys notatus,,", ",M. Lance
Pv16.017,Porichthys notatus,,", ",M. Lance
Pv16.017,Pleuronectid spp.,,", sm and lg",M. Lance
Pv16.017,Pleuronectid spp.,,", ",M. Lance
Pv16.018,Porichthys notatus,,", ",M. Lance
Pv16.018,Porichthys notatus,,", ",M. Lance
Pv16.018,Leptocottus armatus,,", ",M. Lance
Pv16.018,Leptocottus armatus,,", ",M. Lance
Pv16.018,Leptocottus armatus,,", ",M. Lance
Pv16.018,Hemilepidotus spp.,,", ",M. Lance
Pv16.018,Hemilepidotus spp.,,", ",M. Lance
Pv16.018,Hemilepidotus spp.,,", ",M. Lance
Pv16.019,Cottid spp.,,", ",M. Lance
Pv16.019,Cottid spp.,,", ",M. Lance
Pv16.019,Pleuronectid spp.,,", ",M. Lance
Pv16.019,Pleuronectid spp.,,", ",M. Lance
Pv16.019,Pleuronectid spp.,,", ",M. Lance
Pv16.019,Pleuronectes vetulus,,", ",M. Lance
Pv16.019,Pleuronectes vetulus,,", ",M. Lance
Pv16.019,Platichthys stellatus,,", ",M. Lance
Pv16.019,Platichthys stellatus,,", ",M. Lance
Pv16.019,Platichthys stellatus,,", ",M. Lance
Pv16.019,Porichthys notatus,,", ",M. Lance
Pv16.019,Porichthys notatus,,", ",M. Lance
Pv16.019,Porichthys notatus,,", ",M. Lance
Pv16.019,Cottid spp.,,", ",M. Lance
Pv16.021,Engraulis mordax,,", ",M. Lance
Pv16.021,Engraulis mordax,,", ",M. Lance
Pv16.021,Cymatogaster aggregata,,", ",M. Lance
Pv16.021,Cymatogaster aggregata,,", ",M. Lance
Pv16.021,Porichthys notatus,,", ",M. Lance
Pv16.021,Porichthys notatus,,", ",M. Lance
Pv16.021,Porichthys notatus,,", ",M. Lance
Pv16.021,Rajid spp.,,", ",M. Lance
Pv16.021,Platichthys stellatus,,", ",M. Lance
Pv16.021,Platichthys stellatus,,", ",M. Lance
Pv16.021,Platichthys stellatus,,", ",M. Lance
Pv16.021,Pleuronectid spp.,,", ",M. Lance
Pv16.021,Pleuronectid spp.,,", ",M. Lance
Pv16.021,Pleuronectid spp.,,", ",M. Lance
Pv16.021,Leptocottus armatus,,", ",M. Lance
Pv16.021,Leptocottus armatus,,", ",M. Lance
Pv16.021,Leptocottus armatus,,", ",M. Lance
Pv16.023,Pleuronectid spp.,,", ",M. Lance
Pv16.023,Pleuronectid spp.,,", ",M. Lance
Pv16.023,Lampetra ayresii,,", ",M. Lance
Pv16.024,Porichthys notatus,,", ",M. Lance
Pv16.024,Porichthys notatus,,", ",M. Lance
Pv16.024,Porichthys notatus,,", ",M. Lance
Pv16.024,Pleuronectes vetulus,,", ",M. Lance
Pv16.024,Pleuronectes vetulus,,", ",M. Lance
Pv16.025,Porichthys notatus,,", ",M. Lance
Pv16.025,Porichthys notatus,,", ",M. Lance
Pv16.025,Porichthys notatus,,", ",M. Lance
Pv16.025,Doryteuthis opalescens,,", ",M. Lance
Pv16.026,Porichthys notatus,,", ",M. Lance
Pv16.026,Pleuronectid spp.,,", ",M. Lance
Pv16.027,Porichthys notatus,,", ",M. Lance
Pv16.027,Porichthys notatus,,", ",M. Lance
Pv16.028,Merluccius productus,,", ",M. Lance
Pv16.028,Merluccius productus,,", ",M. Lance
Pv16.028,Cymatogaster aggregata,,", ",M. Lance
Pv16.028,Cymatogaster aggregata,,", ",M. Lance
Pv16.028,Cymatogaster aggregata,,", ",M. Lance
Pv16.028,Microgadus proximus,,", ",M. Lance
Pv16.028,Microgadus proximus,,", ",M. Lance
Pv16.028,Engraulis mordax,,", ",M. Lance
Pv16.028,Engraulis mordax,,", ",M. Lance
Pv16.028,Porichthys notatus,,", ",M. Lance
Pv16.028,Porichthys notatus,,", ",M. Lance
Pv16.028,Porichthys notatus,,", ",M. Lance
Pv16.028,Cottid spp.,,", ",M. Lance
Pv16.028,Alosa sapidissima,,", ",M. Lance
Pv16.028,Doryteuthis opalescens,,", ",M. Lance
Pv16.028,Doryteuthis opalescens,,", ",M. Lance
Pv16.030,Cymatogaster aggregata,,", ",M. Lance
Pv16.030,Cymatogaster aggregata,,", ",M. Lance
Pv16.030,Cymatogaster aggregata,,", ",M. Lance
Pv16.031,Cymatogaster aggregata,,", ",M. Lance
Pv16.031,Cymatogaster aggregata,,", ",M. Lance
Pv16.031,Engraulis mordax,,", ",M. Lance
Pv16.031,Doryteuthis opalescens,,", ",M. Lance
Pv16.031,Doryteuthis opalescens,,", ",M. Lance
Pv16.033,Microgadus proximus,,", ",M. Lance
Pv16.033,Microgadus proximus,,", ",M. Lance
Pv16.033,Microgadus proximus,,", ",M. Lance
Pv16.033,Cottid spp.,,", ",M. Lance
Pv16.033,Porichthys notatus,,", ",M. Lance
Pv16.033,Pleuronectid spp.,,", ",M. Lance
Pv16.035,Gadid or Merluccid,,", ",M. Lance
Pv16.035,Engraulis mordax,,", ",M. Lance
Pv16.035,Porichthys notatus,,", ",M. Lance
Pv16.036,Porichthys notatus,,", ",M. Lance
Pv16.036,Gadid or Merluccid,,", ",M. Lance
Pv16.036,Pholid spp.,,", ",M. Lance
Pv16.037,Cottid spp.,,", ",M. Lance
Pv16.039,Gadid or Merluccid,,", ",M. Lance
Pv16.040,Gadid or Merluccid,,", ",M. Lance
Pv16.040,Doryteuthis opalescens,,", ",M. Lance
Pv16.040,Doryteuthis opalescens,,", ",M. Lance
Pv16.042,Pleuronectes vetulus,,", cf",M. Lance
Pv16.042,Pleuronectes vetulus,,", cf",M. Lance
Pv16.043,Unidentifiable fish spp.,,", 1 bone pc",M. Lance
Pv16.043,Doryteuthis opalescens,,", ",M. Lance
Pv16.043,Doryteuthis opalescens,,", ",M. Lance
Pv16.044,Porichthys notatus,,", ",M. Lance
Pv16.044,Porichthys notatus,,", ",M. Lance
Pv16.044,Porichthys notatus,,", ",M. Lance
Pv16.045,Cottid spp.,,", ",M. Lance
Pv16.045,Cottid spp.,,", ",M. Lance
Pv16.045,Cottid spp.,,", ",M. Lance
Pv16.045,Porichthys notatus,,", ",M. Lance
Pv16.045,Doryteuthis opalescens,,", ",M. Lance
Pv16.046,Porichthys notatus,,", ",M. Lance
Pv16.047,Cottid spp.,,", ",M. Lance
Pv16.047,Cottid spp.,,", ",M. Lance
Pv16.047,Porichthys notatus,,", ",M. Lance
Pv16.048,Porichthys notatus,,", ",M. Lance
Pv16.048,Porichthys notatus,,", ",M. Lance
Pv16.048,Doryteuthis opalescens,,", ",M. Lance
Pv16.049,Porichthys notatus,,", ",M. Lance
Pv16.049,Porichthys notatus,,", ",M. Lance
Pv16.049,Porichthys notatus,,", ",M. Lance
Pv16.049,Cymatogaster aggregata,,", ",M. Lance
Pv16.049,Pleuronectid spp.,,", ",M. Lance
Pv16.049,Doryteuthis opalescens,,", ",M. Lance
Pv16.049,Doryteuthis opalescens,,", ",M. Lance
Pv16.049,Octopus rubescens,,", ",M. Lance
Pv16.049,Octopus rubescens,,", ",M. Lance
Pv16.050,Leptocottus armatus,,", ",M. Lance
Pv16.050,Porichthys notatus,,", ",M. Lance
Pv16.050,Porichthys notatus,,", ",M. Lance
Pv16.051,Cottid spp.,,", ",M. Lance
Pv16.052,Doryteuthis opalescens,,", ",M. Lance
Pv16.053,Porichthys notatus,,", ",M. Lance
Pv16.053,Porichthys notatus,,", ",M. Lance
Pv16.053,Porichthys notatus,,", ",M. Lance
Pv16.053,Doryteuthis opalescens,,", ",M. Lance
Pv16.054,Unidentifiable fish spp.,,", ",M. Lance
Pv16.055,Cottid spp.,,", ",M. Lance
Pv16.055,Cottid spp.,,", ",M. Lance
Pv16.055,Cottid spp.,,", ",M. Lance
Pv16.056,Porichthys notatus,,", ",M. Lance
Pv16.056,Porichthys notatus,,", ",M. Lance
Pv16.056,Porichthys notatus,,", ",M. Lance
Pv16.056,Leptocottus armatus,,", ",M. Lance
Pv16.056,Leptocottus armatus,,", ",M. Lance
Pv16.056,Leptocottus armatus,,", ",M. Lance
Pv16.056,Rajid spp.,,", ",M. Lance
Pv16.057,Porichthys notatus,,", ",M. Lance
Pv16.057,Porichthys notatus,,", ",M. Lance
Pv16.057,Porichthys notatus,,", ",M. Lance
Pv16.057,Rajid spp.,,", ",M. Lance
Pv16.057,Engraulis mordax,,", ",M. Lance
Pv16.057,Lampetra ayresii,,", ",M. Lance
Pv16.058,Gasteroseus aculeatus,,", ",M. Lance
Pv16.059,Porichthys notatus,,", ",M. Lance
Pv16.059,Porichthys notatus,,", ",M. Lance
Pv16.059,Porichthys notatus,,", ",M. Lance
Pv16.059,Cymatogaster aggregata,,", ",M. Lance
Pv16.059,Cymatogaster aggregata,,", ",M. Lance
Pv16.059,Leptocottus armatus,,", ",M. Lance
Pv16.059,Leptocottus armatus,,", ",M. Lance
Pv16.059,Cottid spp.,,", ",M. Lance
Pv16.059,Pleuronectid spp.,,", cf Eng Sole",M. Lance
Pv16.059,Pleuronectid spp.,,", ",M. Lance
Pv16.059,Pleuronectid spp.,,", ",M. Lance
Pv16.059,Doryteuthis opalescens,,", ",M. Lance
Pv16.059,Doryteuthis opalescens,,", ",M. Lance
Pv16.060,Cottid spp.,,", ",M. Lance
Pv16.060,Cottid spp.,,", ",M. Lance
Pv16.060,Doryteuthis opalescens,,", ",M. Lance
Pv16.060,Doryteuthis opalescens,,", ",M. Lance
Pv16.061,Cymatogaster aggregata,,", ",M. Lance
Pv16.061,Cymatogaster aggregata,,", ",M. Lance
Pv16.061,Cymatogaster aggregata,,", ",M. Lance
Pv16.061,Doryteuthis opalescens,,", ",M. Lance
Pv16.062,Porichthys notatus,,", ",M. Lance
Pv16.062,Porichthys notatus,,", ",M. Lance
Pv16.064,Hemilepidotus spp.,,", ",M. Lance
Pv16.064,Hemilepidotus spp.,,", ",M. Lance
Pv16.064,Hemilepidotus spp.,,", ",M. Lance
Pv16.064,Porichthys notatus,,", ",M. Lance
Pv16.064,Porichthys notatus,,", ",M. Lance
Pv16.064,Porichthys notatus,,", ",M. Lance
Pv16.065,Engraulis mordax,,", ",M. Lance
Pv16.065,Engraulis mordax,,", ",M. Lance
Pv16.065,Engraulis mordax,,", ",M. Lance
Pv16.065,Clupeid spp.,,", ",M. Lance
Pv16.066,Rajid spp.,,", ",M. Lance
Pv16.066,Engraulis mordax,,", ",M. Lance
Pv16.066,Engraulis mordax,,", ",M. Lance
Pv16.069,Cymatogaster aggregata,,", ",M. Lance
Pv16.069,Cymatogaster aggregata,,", ",M. Lance
Pv16.069,Cymatogaster aggregata,,", ",M. Lance
Pv16.070,Pleuronectid spp.,,", ",M. Lance
Pv16.070,Engraulis mordax,,", ",M. Lance
Pv16.070,Engraulis mordax,,", ",M. Lance
Pv16.070,Engraulis mordax,,", ",M. Lance
Pv16.071,Engraulis mordax,,", ",M. Lance
Pv16.071,Engraulis mordax,,", ",M. Lance
Pv16.071,Leptocottus armatus,,", ",M. Lance
Pv16.071,Leptocottus armatus,,", ",M. Lance
Pv16.071,Leptocottus armatus,,", ",M. Lance
Pv16.071,Hemilepidotus spp.,,", ",M. Lance
Pv16.071,Hemilepidotus spp.,,", ",M. Lance
Pv16.071,Hemilepidotus spp.,,", ",M. Lance
Pv16.072,Cymatogaster aggregata,,", ",M. Lance
Pv16.072,Cymatogaster aggregata,,", ",M. Lance
Pv16.072,Porichthys notatus,,", ",M. Lance
Pv16.072,Doryteuthis opalescens,,", ",M. Lance
Pv16.072,Doryteuthis opalescens,,", ",M. Lance
Pv16.073,Hemilepidotus spp.,,", ",M. Lance
Pv16.073,Hemilepidotus spp.,,", ",M. Lance
Pv16.073,Engraulis mordax,,", ",M. Lance
Pv16.073,Engraulis mordax,,", ",M. Lance
Pv16.074,Doryteuthis opalescens,,", ",M. Lance
Pv16.074,Doryteuthis opalescens,,", ",M. Lance
Pv16.075,Porichthys notatus,,", ",M. Lance
Pv16.075,Porichthys notatus,,", ",M. Lance
Pv16.075,Porichthys notatus,,", ",M. Lance
Pv16.075,Gadid or Merluccid,,", ",M. Lance
Pv16.075,Leptocottus armatus,,", ",M. Lance
Pv16.075,Engraulis mordax,,", ",M. Lance
Pv16.075,Doryteuthis opalescens,,", ",M. Lance
Pv16.075,Doryteuthis opalescens,,", ",M. Lance
Pv16.076,Doryteuthis opalescens,,", ",M. Lance
Pv16.076,Doryteuthis opalescens,,", ",M. Lance
Pv16.078,Leptocottus armatus,,", ",M. Lance
Pv16.078,Leptocottus armatus,,", ",M. Lance
Pv16.078,Leptocottus armatus,,", ",M. Lance
Pv16.078,Porichthys notatus,,", ",M. Lance
Pv16.078,Porichthys notatus,,", ",M. Lance
Pv16.078,Cymatogaster aggregata,,", ",M. Lance
Pv16.078,Hemilepidotus spp.,,", ",M. Lance
Pv16.078,Hemilepidotus spp.,,", ",M. Lance
Pv16.078,Doryteuthis opalescens,,", ",M. Lance
Pv16.078,Doryteuthis opalescens,,", ",M. Lance
Pv16.079,Rajid spp.,,", ",M. Lance
Pv16.079,Porichthys notatus,,", ",M. Lance
Pv16.079,Porichthys notatus,,", ",M. Lance
Pv16.079,Porichthys notatus,,", ",M. Lance
Pv16.079,Porichthys notatus,,", ",M. Lance
Pv16.079,Engraulis mordax,,", ",M. Lance
Pv16.079,Platichthys stellatus,,", ",M. Lance
Pv16.079,Platichthys stellatus,,", ",M. Lance
Pv16.080,Leptocottus armatus,,", ",M. Lance
Pv16.080,Leptocottus armatus,,", ",M. Lance
Pv16.080,Doryteuthis opalescens,,", ",M. Lance
Pv16.080,Doryteuthis opalescens,,", ",M. Lance
Pv16.081,Pleuronectid spp.,,", ",M. Lance
Pv16.081,Pleuronectid spp.,,", ",M. Lance
Pv16.081,Leptocottus armatus,,", ",M. Lance
Pv16.081,Leptocottus armatus,,", ",M. Lance
Pv16.081,Clupeid spp.,,", ",M. Lance
Pv16.081,Doryteuthis opalescens,,", ",M. Lance
Pv16.082,Cymatogaster aggregata,,", ",M. Lance
Pv16.082,Cymatogaster aggregata,,", ",M. Lance
Pv16.082,Cymatogaster aggregata,,", ",M. Lance
Pv16.082,Porichthys notatus,,", ",M. Lance
Pv16.082,Porichthys notatus,,", ",M. Lance
Pv16.082,Microgadus proximus,,", ",M. Lance
Pv16.082,Microgadus proximus,,", ",M. Lance
Pv16.082,Doryteuthis opalescens,,", ",M. Lance
Pv16.082,Doryteuthis opalescens,,", ",M. Lance
Pv16.083,Cymatogaster aggregata,,", ",M. Lance
Pv16.083,Engraulis mordax,,", ",M. Lance
Pv16.083,Cottid spp.,,", ",M. Lance
Pv16.083,Cottid spp.,,", ",M. Lance
Pv16.083,Doryteuthis opalescens,,", ",M. Lance
Pv16.083,Doryteuthis opalescens,,", ",M. Lance
Pv16.084,Engraulis mordax,,", ",M. Lance
Pv16.084,Engraulis mordax,,", ",M. Lance
Pv16.084,Microgadus proximus,,", ",M. Lance
Pv16.084,Doryteuthis opalescens,,", ",M. Lance
Pv16.084,Doryteuthis opalescens,,", ",M. Lance
Pv16.085,Cymatogaster aggregata,,", ",M. Lance
Pv16.085,Cymatogaster aggregata,,", ",M. Lance
Pv16.085,Cymatogaster aggregata,,", ",M. Lance
Pv16.085,Leptocottus armatus,,", ",M. Lance
Pv16.085,Engraulis mordax,,", ",M. Lance
Pv16.085,Engraulis mordax,,", ",M. Lance
Pv16.085,Doryteuthis opalescens,,", ",M. Lance
Pv16.085,Doryteuthis opalescens,,", ",M. Lance
Pv16.086,Cymatogaster aggregata,,", ",M. Lance
Pv16.086,Cymatogaster aggregata,,", ",M. Lance
Pv16.086,Cymatogaster aggregata,,", ",M. Lance
Pv16.086,Gadid or Merluccid,,", ",M. Lance
Pv16.086,Doryteuthis opalescens,,", ",M. Lance
Pv16.086,Doryteuthis opalescens,,", ",M. Lance
Pv16.088,Pleuronectid spp.,,", ",M. Lance
Pv16.088,Pleuronectid spp.,,", ",M. Lance
Pv16.089,Porichthys notatus,,", ",M. Lance
Pv16.089,Porichthys notatus,,", ",M. Lance
Pv16.089,Porichthys notatus,,", ",M. Lance
Pv16.089,Cymatogaster aggregata,,", ",M. Lance
Pv16.089,Cymatogaster aggregata,,", ",M. Lance
Pv16.089,Cymatogaster aggregata,,", ",M. Lance
Pv16.090,Pleuronectes vetulus,,", ",M. Lance
Pv16.090,Pleuronectes vetulus,,", ",M. Lance
Pv16.090,Porichthys notatus,,", ",M. Lance
Pv16.090,Porichthys notatus,,", ",M. Lance
Pv16.091,Pleuronectid spp.,,", ",M. Lance
Pv16.091,Rajid spp.,,", ",M. Lance
Pv16.092,Porichthys notatus,,", ",M. Lance
Pv16.092,Porichthys notatus,,", ",M. Lance
Pv16.092,Osmerid spp.,,", ",M. Lance
Pv16.093,Cymatogaster aggregata,,", ",M. Lance
Pv16.093,Cymatogaster aggregata,,", ",M. Lance
Pv16.093,Cymatogaster aggregata,,", ",M. Lance
Pv16.093,Doryteuthis opalescens,,", ",M. Lance
Pv16.093,Doryteuthis opalescens,,", ",M. Lance
Pv16.094,Leptocottus armatus,,", ",M. Lance
Pv16.094,Leptocottus armatus,,", ",M. Lance
Pv16.094,Leptocottus armatus,,", ",M. Lance
Pv16.094,Porichthys notatus,,", ",M. Lance
Pv16.094,Porichthys notatus,,", ",M. Lance
Pv16.094,Porichthys notatus,,", ",M. Lance
Pv16.094,Theragra chalcogramma,,", ",M. Lance
Pv16.094,Theragra chalcogramma,,", ",M. Lance
Pv16.094,Theragra chalcogramma,,", ",M. Lance
Pv16.094,Merluccius productus,,", ",M. Lance
Pv16.094,Merluccius productus,,", ",M. Lance
Pv16.094,Merluccius productus,,", ",M. Lance
Pv16.095,Hemilepidotus spp.,,", ",M. Lance
Pv16.095,Hemilepidotus spp.,,", ",M. Lance
Pv16.095,Hemilepidotus spp.,,", ",M. Lance
Pv16.095,Leptocottus armatus,,", ",M. Lance
Pv16.095,Leptocottus armatus,,", ",M. Lance
Pv16.095,Leptocottus armatus,,", ",M. Lance
Pv16.095,Platichthys stellatus,,", ",M. Lance
Pv16.095,Platichthys stellatus,,", ",M. Lance
Pv16.095,Platichthys stellatus,,", ",M. Lance
Pv16.095,Pleuronectid spp.,,", ",M. Lance
Pv16.095,Pleuronectid spp.,,", ",M. Lance
Pv16.096,Cottid spp.,,", ",M. Lance
Pv16.097,Rajid spp.,,", ",M. Lance
Pv16.097,Leptocottus armatus,,", ",M. Lance
Pv16.097,Leptocottus armatus,,", ",M. Lance
Pv16.097,Leptocottus armatus,,", ",M. Lance
Pv16.097,Liparid spp.,,", ",M. Lance
Pv16.097,Liparid spp.,,", ",M. Lance
Pv16.097,Liparid spp.,,", ",M. Lance
Pv16.097,Theragra chalcogramma,,", ",M. Lance
Pv16.097,Theragra chalcogramma,,", ",M. Lance
Pv16.097,Theragra chalcogramma,,", ",M. Lance
Pv16.097,Merluccius productus,,", ",M. Lance
Pv16.097,Merluccius productus,,", ",M. Lance
Pv16.097,Merluccius productus,,", ",M. Lance
Pv16.097,Cymatogaster aggregata,,", ",M. Lance
Pv16.097,Cymatogaster aggregata,,", ",M. Lance
Pv16.097,Cymatogaster aggregata,,", ",M. Lance
Pv16.097,Porichthys notatus,,", ",M. Lance
Pv16.097,Porichthys notatus,,", ",M. Lance
Pv16.097,Pleuronectid spp.,,", ",M. Lance
Pv16.097,Pleuronectid spp.,,", ",M. Lance
Pv16.097,Doryteuthis opalescens,,", ",M. Lance
Pv16.097,Doryteuthis opalescens,,", ",M. Lance
Pv16.098,Hemilepidotus spp.,,", ",M. Lance
Pv16.099,Porichthys notatus,,", ",M. Lance
Pv16.100,Octopus rubescens,,", ",M. Lance
Pv16.100,Cottid spp.,,", ",M. Lance
Pv16.100,Cottid spp.,,", ",M. Lance
Pv16.100,Cottid spp.,,", ",M. Lance
Pv16.100,Pleuronectid spp.,,", ",M. Lance
Pv16.100,Pleuronectid spp.,,", ",M. Lance
Pv16.101,Porichthys notatus,,", ",M. Lance
Pv16.101,Porichthys notatus,,", ",M. Lance
Pv16.101,Porichthys notatus,,", ",M. Lance
Pv16.101,Leptocottus armatus,,", ",M. Lance
Pv16.101,Leptocottus armatus,,", ",M. Lance
Pv16.101,Leptocottus armatus,,", ",M. Lance
Pv16.101,Theragra chalcogramma,,", ",M. Lance
Pv16.101,Theragra chalcogramma,,", ",M. Lance
Pv16.101,Theragra chalcogramma,,", ",M. Lance
Pv16.101,Merluccius productus,,", ",M. Lance
Pv16.101,Merluccius productus,,", ",M. Lance
Pv16.101,Merluccius productus,,", ",M. Lance
Pv16.102,Merluccius productus,,", ",M. Lance
Pv16.102,Merluccius productus,,", ",M. Lance
Pv16.102,Merluccius productus,,", ",M. Lance
Pv16.102,Cottid spp.,,", ",M. Lance
Pv16.102,Doryteuthis opalescens,,", ",M. Lance
Pv16.103,Porichthys notatus,,", ",M. Lance
Pv16.104,Lampetra ayresii,,", ",M. Lance
Pv16.104,Porichthys notatus,,", ",M. Lance
Pv16.104,Doryteuthis opalescens,,", ",M. Lance
Pv16.104,Doryteuthis opalescens,,", ",M. Lance
Pv16.105,Leptocottus armatus,,", ",M. Lance
Pv16.105,Leptocottus armatus,,", ",M. Lance
Pv16.105,Gadid or Merluccid,,", ",M. Lance
Pv16.105,Porichthys notatus,,", ",M. Lance
Pv16.105,Porichthys notatus,,", ",M. Lance
Pv16.106,Porichthys notatus,,", ",M. Lance
Pv16.106,Porichthys notatus,,", ",M. Lance
Pv16.106,Microgadus proximus,,", ",M. Lance
Pv16.106,Microgadus proximus,,", ",M. Lance
Pv16.106,Leptocottus armatus,,", ",M. Lance
Pv16.106,Leptocottus armatus,,", ",M. Lance
Pv16.106,Doryteuthis opalescens,,", ",M. Lance
Pv16.107,Leptocottus armatus,,", ",M. Lance
Pv16.107,Leptocottus armatus,,", ",M. Lance
Pv16.107,Porichthys notatus,,", ",M. Lance
Pv16.107,Pholid spp.,,", ",M. Lance
Pv16.107,Doryteuthis opalescens,,", ",M. Lance
Pv16.107,Doryteuthis opalescens,,", ",M. Lance
Pv16.108,Leptocottus armatus,,", ",M. Lance
Pv16.109,Porichthys notatus,,", ",M. Lance
Pv16.109,Porichthys notatus,,", ",M. Lance
Pv16.109,Porichthys notatus,,", ",M. Lance
Pv16.109,Leptocottus armatus,,", ",M. Lance
Pv16.109,Gadid or Merluccid,,", ",M. Lance
Pv16.109,Pleuronectid spp.,,", cf Starry",M. Lance
Pv16.110,Merluccius productus,,", ",M. Lance
Pv16.110,Merluccius productus,,", ",M. Lance
Pv16.110,Merluccius productus,,", ",M. Lance
Pv16.110,Cottid spp.,,", ",M. Lance
Pv16.111,Leptocottus armatus,,", ",M. Lance
Pv16.111,Leptocottus armatus,,", ",M. Lance
Pv16.112,Leptocottus armatus,,", ",M. Lance
Pv16.112,Doryteuthis opalescens,,", ",M. Lance
Pv16.112,Doryteuthis opalescens,,", ",M. Lance
Pv16.113,Leptocottus armatus,,", ",M. Lance
Pv16.113,Leptocottus armatus,,", ",M. Lance
Pv16.113,Doryteuthis opalescens,,", ",M. Lance
Pv16.113,Doryteuthis opalescens,,", ",M. Lance
Pv16.114,Pleuronectid spp.,,", ",M. Lance
Pv16.114,Pleuronectid spp.,,", ",M. Lance
Pv16.115,Merluccius productus,,", ",M. Lance
Pv16.115,Merluccius productus,,", ",M. Lance
Pv16.115,Merluccius productus,,", ",M. Lance
Pv16.116,Leptocottus armatus,,", ",M. Lance
Pv16.116,Theragra chalcogramma,,", ",M. Lance
Pv16.116,Theragra chalcogramma,,", ",M. Lance
Pv16.116,Theragra chalcogramma,,", ",M. Lance
Pv16.116,Merluccius productus,,", ",M. Lance
Pv16.116,Merluccius productus,,", ",M. Lance
Pv16.116,Merluccius productus,,", ",M. Lance
Pv16.116,Porichthys notatus,,", ",M. Lance
Pv16.116,Porichthys notatus,,", ",M. Lance
Pv16.116,Porichthys notatus,,", ",M. Lance
Pv16.116,Leptocottus armatus,,", ",M. Lance
Pv16.116,Leptocottus armatus,,", ",M. Lance
Pv16.116,Doryteuthis opalescens,,", ",M. Lance
Pv16.117,Leptocottus armatus,,", ",M. Lance
Pv16.117,Leptocottus armatus,,", ",M. Lance
Pv16.117,Porichthys notatus,,", ",M. Lance
Pv16.117,Porichthys notatus,,", ",M. Lance
Pv16.117,Cymatogaster aggregata,,", ",M. Lance
Pv16.117,Cymatogaster aggregata,,", ",M. Lance
Pv16.117,Merluccius productus,,", ",M. Lance
Pv16.117,Merluccius productus,,", ",M. Lance
Pv16.117,Doryteuthis opalescens,,", ",M. Lance
Pv16.117,Doryteuthis opalescens,,", ",M. Lance
Pv16.118,Leptocottus armatus,,", ",M. Lance
Pv16.118,Leptocottus armatus,,", ",M. Lance
Pv16.118,Leptocottus armatus,,", ",M. Lance
Pv16.118,Merluccius productus,,", ",M. Lance
Pv16.118,Rajid spp.,,", ",M. Lance
Pv16.118,Porichthys notatus,,", ",M. Lance
Pv16.118,Doryteuthis opalescens,,", ",M. Lance
Pv16.119,Hemilepidotus spp.,,", ",M. Lance
Pv16.119,Hemilepidotus spp.,,", ",M. Lance
Pv16.119,Hemilepidotus spp.,,", ",M. Lance
Pv16.119,Doryteuthis opalescens,,", ",M. Lance
Pv16.119,Doryteuthis opalescens,,", ",M. Lance
Pv16.120,Porichthys notatus,,", ",M. Lance
Pv16.120,Porichthys notatus,,", ",M. Lance
Pv16.120,Hemilepidotus spp.,,", ",M. Lance
Pv16.120,Hemilepidotus spp.,,", ",M. Lance
Pv16.120,Octopus rubescens,,", ",M. Lance
Pv16.120,Octopus rubescens,,", ",M. Lance
Pv16.121,Porichthys notatus,,", ",M. Lance
Pv16.121,Porichthys notatus,,", ",M. Lance
Pv16.121,Merluccius productus,,", ",M. Lance
Pv16.121,Merluccius productus,,", ",M. Lance
Pv16.121,Merluccius productus,,", ",M. Lance
Pv16.121,Doryteuthis opalescens,,", ",M. Lance
Pv16.121,Doryteuthis opalescens,,", ",M. Lance
Pv16.121,Octopus rubescens,,", ",M. Lance
Pv16.121,Octopus rubescens,,", ",M. Lance
Pv16.122,Cottid spp.,,", ",M. Lance
Pv16.122,Doryteuthis opalescens,,", ",M. Lance
Pv16.122,Doryteuthis opalescens,,", ",M. Lance
Pv16.123,Merluccius productus,,", ",M. Lance
Pv16.123,Merluccius productus,,", ",M. Lance
Pv16.123,Doryteuthis opalescens,,", ",M. Lance
Pv16.123,Doryteuthis opalescens,,", ",M. Lance
Pv16.124,Leptocottus armatus,,", ",M. Lance
Pv16.124,Leptocottus armatus,,", ",M. Lance
Pv16.124,Porichthys notatus,,", ",M. Lance
Pv16.124,Porichthys notatus,,", ",M. Lance
Pv16.124,Porichthys notatus,,", ",M. Lance
Pv16.124,Stichaeid spp.,,", ",M. Lance
Pv16.124,Doryteuthis opalescens,,", ",M. Lance
Pv16.125,Leptocottus armatus,,", ",M. Lance
Pv16.125,Leptocottus armatus,,", ",M. Lance
Pv16.125,Porichthys notatus,,", ",M. Lance
Pv16.125,Porichthys notatus,,", ",M. Lance
Pv16.125,Theragra chalcogramma,,", ",M. Lance
Pv16.125,Theragra chalcogramma,,", ",M. Lance
Pv16.125,Doryteuthis opalescens,,", ",M. Lance
Pv16.125,Doryteuthis opalescens,,", ",M. Lance
Pv16.127,Cymatogaster aggregata,,", ",M. Lance
Pv16.127,Cymatogaster aggregata,,", ",M. Lance
Pv16.127,Cymatogaster aggregata,,", ",M. Lance
Pv16.127,Porichthys notatus,,", ",M. Lance
Pv16.127,Doryteuthis opalescens,,", ",M. Lance
Pv16.127,Doryteuthis opalescens,,", ",M. Lance
Pv16.128,Porichthys notatus,,", ",M. Lance
Pv16.128,Porichthys notatus,,", ",M. Lance
Pv16.128,Porichthys notatus,,", ",M. Lance
Pv16.128,Theragra chalcogramma,,", ",M. Lance
Pv16.128,Theragra chalcogramma,,", ",M. Lance
Pv16.128,Leptocottus armatus,,", ",M. Lance
Pv16.128,Leptocottus armatus,,", ",M. Lance
Pv16.128,Leptocottus armatus,,", ",M. Lance
Pv16.128,Pleuronectid spp.,,", ",M. Lance
Pv16.128,Pleuronectid spp.,,", ",M. Lance
Pv16.128,Pleuronectid spp.,,", ",M. Lance
Pv16.128,Zoarcid spp.,,", ",M. Lance
Pv16.128,Zoarcid spp.,,", ",M. Lance
Pv16.129,Rajid spp.,,", ",M. Lance
Pv16.129,Gadid or Merluccid,,", ",M. Lance
Pv16.129,Doryteuthis opalescens,,", ",M. Lance
Pv16.129,Doryteuthis opalescens,,", ",M. Lance
Pv16.130,Cottid spp.,,", cf HEMSPP",M. Lance
Pv16.130,Cottid spp.,,", ",M. Lance
Pv16.130,Cottid spp.,,", ",M. Lance
Pv16.131,Clupea pallasi,,", ",M. Lance
Pv16.131,Clupea pallasi,,", ",M. Lance
Pv16.131,Ammodytes hexapteras,,", ",M. Lance
Pv16.131,Ammodytes hexapteras,,", ",M. Lance
Pv16.131,Pleuronectid spp.,,", ",M. Lance
Pv16.131,Pleuronectid spp.,,", ",M. Lance
Pv16.131,Pleuronectid spp.,,", ",M. Lance
Pv16.131,Doryteuthis opalescens,,", ",M. Lance
Pv16.131,Doryteuthis opalescens,,", ",M. Lance
Pv16.132,Leptocottus armatus,,", ",M. Lance
Pv16.132,Engraulis mordax,,", ",M. Lance
Pv16.132,Clupeid spp.,,", ",M. Lance
Pv16.132,Doryteuthis opalescens,,", ",M. Lance
Pv16.132,Doryteuthis opalescens,,", ",M. Lance
Pv16.134,Gadid or Merluccid,,", ",M. Lance
Pv16.134,Gadid or Merluccid,,", ",M. Lance
Pv16.134,Doryteuthis opalescens,,", ",M. Lance
Pv16.134,Doryteuthis opalescens,,", ",M. Lance
Pv16.134,Octopus rubescens,,", ",M. Lance
Pv16.134,Rossia pacifica,,", ",M. Lance
Pv16.134,Rossia pacifica,,", ",M. Lance
Pv16.135,Porichthys notatus,,", ",M. Lance
Pv16.135,Doryteuthis opalescens,,", ",M. Lance
Pv16.136,Zoarcid spp.,,", ",M. Lance
Pv16.136,Engraulis mordax,,", ",M. Lance
Pv16.136,Engraulis mordax,,", ",M. Lance
Pv16.136,Engraulis mordax,,", ",M. Lance
Pv16.136,Porichthys notatus,,", ",M. Lance
Pv16.136,Porichthys notatus,,", ",M. Lance
Pv16.136,Porichthys notatus,,", ",M. Lance
Pv16.136,Platichthys stellatus,,", ",M. Lance
Pv16.136,Platichthys stellatus,,", ",M. Lance
Pv16.136,Cottid spp.,,", ",M. Lance
Pv16.136,Cottid spp.,,", ",M. Lance
Pv16.136,Gadid or Merluccid,,", ",M. Lance
Pv16.136,Gadid or Merluccid,,", ",M. Lance
Pv16.136,Doryteuthis opalescens,,", ",M. Lance
Pv16.137,Cymatogaster aggregata,,", ",M. Lance
Pv16.137,Cymatogaster aggregata,,", ",M. Lance
Pv16.137,Cymatogaster aggregata,,", ",M. Lance
Pv16.137,Engraulis mordax,,", ",M. Lance
Pv16.137,Engraulis mordax,,", ",M. Lance
Pv16.137,Engraulis mordax,,", ",M. Lance
Pv16.138,Porichthys notatus,,", ",M. Lance
Pv16.138,Porichthys notatus,,", ",M. Lance
Pv16.138,Porichthys notatus,,", ",M. Lance
Pv16.138,Pleuronectes vetulus,,", ",M. Lance
Pv16.138,Pleuronectes vetulus,,", ",M. Lance
Pv16.138,Pleuronectes vetulus,,", ",M. Lance
Pv16.138,Pleuronectid spp.,,", ",M. Lance
Pv16.138,Pleuronectid spp.,,", ",M. Lance
Pv16.138,Pleuronectid spp.,,", ",M. Lance
Pv16.138,Leptocottus armatus,,", ",M. Lance
Pv16.138,Leptocottus armatus,,", ",M. Lance
Pv16.138,Leptocottus armatus,,", ",M. Lance
Pv16.138,Clupeid spp.,,", ",M. Lance
Pv16.138,Clupeid spp.,,", ",M. Lance
Pv16.138,Rajid spp.,,", ",M. Lance
Pv16.138,Merluccius productus,,", ",M. Lance
Pv16.138,Merluccius productus,,", ",M. Lance
Pv16.138,Cymatogaster aggregata,,", ",M. Lance
Pv16.138,Cymatogaster aggregata,,", ",M. Lance
Pv16.138,Cymatogaster aggregata,,", ",M. Lance
Pv16.138,Cymatogaster aggregata,,", ",M. Lance
Pv16.138,Doryteuthis opalescens,,", ",M. Lance
Pv16.138,Doryteuthis opalescens,,", ",M. Lance
Pv16.139,Doryteuthis opalescens,,", ",M. Lance
Pv16.139,Doryteuthis opalescens,,", ",M. Lance
Pv16.140,Doryteuthis opalescens,,", ",M. Lance
Pv16.141,Engraulis mordax,,", ",M. Lance
Pv16.141,Clupeid spp.,,", ",M. Lance
Pv16.142,Porichthys notatus,,", ",M. Lance
Pv16.143,Leptocottus armatus,,", ",M. Lance
Pv16.144,Oncorhynchus tshawytscha,Juvenile,"juvenile, ",M. Lance
Pv16.144,Alosa sapidissima ,,", ",M. Lance
Pv16.145,Porichthys notatus,,", ",M. Lance
Pv16.146,Stichaeid spp.,,", ",M. Lance
Pv16.146,Stichaeid spp.,,", ",M. Lance
Pv16.146,Stichaeid spp.,,", ",M. Lance
Pv16.147,Leptocottus armatus,,", ",M. Lance
Pv16.147,Leptocottus armatus,,", ",M. Lance
Pv16.147,Leptocottus armatus,,", ",M. Lance
Pv16.147,Porichthys notatus,,", ",M. Lance
Pv16.147,Porichthys notatus,,", ",M. Lance
Pv16.147,Porichthys notatus,,", ",M. Lance
Pv16.147,Theragra chalcogramma,,", ",M. Lance
Pv16.147,Theragra chalcogramma,,", ",M. Lance
Pv16.148,Stichaeid spp.,,", ",M. Lance
Pv16.148,Stichaeid spp.,,", ",M. Lance
Pv16.148,Stichaeid spp.,,", ",M. Lance
Pv16.148,Doryteuthis opalescens,,", ",M. Lance
Pv16.148,Doryteuthis opalescens,,", ",M. Lance
Pv16.149,Stichaeid spp.,,", ",M. Lance
Pv16.149,Stichaeid spp.,,", ",M. Lance
Pv16.149,Stichaeid spp.,,", ",M. Lance
Pv16.150,Oncorhynchus sp.,Adult,"sub-adult ?, ",M. Lance
Pv16.151,Oncorhynchus sp.  ,,", ",M. Lance
Pv16.152,Oncorhynchus sp.,Adult,"sub-adult ?, Tentatve species id and age classification based on very large size and dentate condition of gillrakers of gillrakers",M. Lance
Pv16.153,Porichthys notatus,,", ",M. Lance
Pv16.153,Porichthys notatus,,", ",M. Lance
Pv16.153,Porichthys notatus,,", ",M. Lance
Pv16.154,Oncorhynchus sp.,Adult,"Adult, Tentatve species id and age classification based on very large size and dentate condition of gillrakers of gillrakers",M. Lance
Pv16.155,Oncorhynchus sp.  ,Adult,"Adult, No vertebrae present. Age classification based on exceptionally large teeth and gillrakers",M. Lance
Pv16.156,Oncorhynchus sp.  ,Adult,"Adult,  vertebrae present. Age classification based on exceptionally large vertebral size estimate,  teeth and gillrakers",M. Lance
Pv16.157,Oncorhynchus sp.  ,Adult,"Adult, No vertebrae present. Age classification based on exceptionally large teeth and gillrakers",M. Lance
Pv16.158,Oncorhynchus sp.  ,Adult,"Adult,  vertebrae present. Age classification based on exceptionally large vertebral size estimate and gillrakers",M. Lance
Pv16.159,Oncorhynchus sp.  ,Adult,"Adult, No vertebrae present. Age classification based on exceptionally large gillrakers and pectoral fin ray",M. Lance
Pv16.160,Oncorhynchus sp.  ,Adult,"Adult, No vertebrae present. Age classification based on exceptionally large gillrakers, pharyngobracial and teeth.",M. Lance
Pv16.161,Oncorhynchus sp.  ,Adult,"Adult, No vertebrae present. Age classification based on exceptionally large gillrakers, pharyngobracial, supraopercular and teeth.",M. Lance
Pv16.162,Porichthys notatus,,", ",M. Lance
Pv16.163,Oncorhynchus kisutch,Juvenile,"juvenile, otolith originally misidentified by WAW",M. Lance
Pv16.163,Oncorhynchus sp.  ,Adult,"Adult, verts represented only by rings",M. Lance
Pv16.165,Porichthys notatus,,", ",M. Lance
Pv16.165,Pholid spp.,,", ",M. Lance
Pv16.166,Pholid spp.,,", ",M. Lance
Pv16.167,Pleuronectid spp.,,", ",M. Lance
Pv16.167,Gadid or Merluccid,,", ",M. Lance
Pv16.167,Pholid spp.,,", ",M. Lance
Pv16.168,Merluccius productus,,", ",M. Lance
Pv16.168,Merluccius productus,,", ",M. Lance
Pv16.168,Merluccius productus,,", ",M. Lance
Pv16.168,Pleuronectid spp.,,", ",M. Lance
Pv16.168,Pleuronectid spp.,,", ",M. Lance
Pv16.168,Porichthys notatus,,", ",M. Lance
Pv16.168,Porichthys notatus,,", ",M. Lance
Pv16.168,Porichthys notatus,,", ",M. Lance
Pv16.169,Cottid spp.,,", ",M. Lance
Pv16.170,Cottid spp.,,", ",M. Lance
Pv16.171,Theragra chalcogramma,,", ",M. Lance
Pv16.171,Theragra chalcogramma,,", ",M. Lance
Pv16.171,Porichthys notatus,,", ",M. Lance
Pv16.171,Leptocottus armatus,,", ",M. Lance
Pv16.171,Leptocottus armatus,,", ",M. Lance
Pv16.171,Pleuronectid spp.,,", ",M. Lance
Pv16.171,Pleuronectid spp.,,", ",M. Lance
Pv16.171,Liparid spp.,,", ",M. Lance
Pv16.171,Doryteuthis opalescens,,", ",M. Lance
Pv16.171,Doryteuthis opalescens,,", ",M. Lance
Pv16.172,Leptocottus armatus,,", ",M. Lance
Pv16.172,Leptocottus armatus,,", ",M. Lance
Pv16.172,Merluccius productus,,", ",M. Lance
Pv16.172,Merluccius productus,,", ",M. Lance
Pv16.173,Gadid or Merluccid,,", ",M. Lance
Pv16.173,Doryteuthis opalescens,,", ",M. Lance
Pv16.173,Doryteuthis opalescens,,", ",M. Lance
Pv16.174,Cymatogaster aggregata,,", ",M. Lance
Pv16.174,Cymatogaster aggregata,,", ",M. Lance
Pv16.174,Cymatogaster aggregata,,", ",M. Lance
Pv16.174,Merluccius productus,,", ",M. Lance
Pv16.174,Merluccius productus,,", ",M. Lance
Pv16.174,Merluccius productus,,", ",M. Lance
Pv16.174,Theragra chalcogramma,,", ",M. Lance
Pv16.174,Theragra chalcogramma,,", ",M. Lance
Pv16.174,Theragra chalcogramma,,", ",M. Lance
Pv16.174,Doryteuthis opalescens,,", ",M. Lance
Pv16.174,Doryteuthis opalescens,,", ",M. Lance
Pv16.175,Porichthys notatus,,", ",M. Lance
Pv16.175,Porichthys notatus,,", ",M. Lance
Pv16.175,Porichthys notatus,,", ",M. Lance
Pv16.175,Theragra chalcogramma,,", ",M. Lance
Pv16.175,Theragra chalcogramma,,", ",M. Lance
Pv16.175,Platichthys stellatus,,", ",M. Lance
Pv16.175,Platichthys stellatus,,", ",M. Lance
Pv16.175,Leptocottus armatus,,", ",M. Lance
Pv16.175,Leptocottus armatus,,", ",M. Lance
Pv16.175,Leptocottus armatus,,", ",M. Lance
Pv16.175,Doryteuthis opalescens,,", ",M. Lance
Pv16.175,Doryteuthis opalescens,,", ",M. Lance
Pv16.175,Octopus rubescens,,", ",M. Lance
Pv16.175,Octopus rubescens,,", ",M. Lance
Pv16.176,Cymatogaster aggregata,,", ",M. Lance
Pv16.176,Cymatogaster aggregata,,", ",M. Lance
Pv16.176,Cymatogaster aggregata,,", ",M. Lance
Pv16.176,Doryteuthis opalescens,,", ",M. Lance
Pv16.176,Doryteuthis opalescens,,", ",M. Lance
Pv16.176,Rossia pacifica,,", ",M. Lance
Pv16.177,Engraulis mordax,,", ",M. Lance
Pv16.177,Doryteuthis opalescens,,", ",M. Lance
Pv16.177,Doryteuthis opalescens,,", ",M. Lance
Pv16.178,Engraulis mordax,,", ",M. Lance
Pv16.178,Doryteuthis opalescens,,", ",M. Lance
Pv16.178,Doryteuthis opalescens,,", ",M. Lance
Pv16.179,Clupea pallasi,,", ",M. Lance
Pv16.179,Cymatogaster aggregata,,", ",M. Lance
Pv16.179,Cymatogaster aggregata,,", ",M. Lance
Pv16.179,Engraulis mordax,,", ",M. Lance
Pv16.179,Pleuronectid spp.,,", ",M. Lance
Pv16.179,Doryteuthis opalescens,,", ",M. Lance
Pv16.179,Doryteuthis opalescens,,", ",M. Lance
Pv16.180,Hemilepidotus spp.,,", ",M. Lance
Pv16.180,Hemilepidotus spp.,,", ",M. Lance
Pv16.180,Hemilepidotus spp.,,", ",M. Lance
Pv16.182,Porichthys notatus,,", ",M. Lance
Pv16.182,Porichthys notatus,,", ",M. Lance
Pv16.182,Porichthys notatus,,", ",M. Lance
Pv16.182,Engraulis mordax,,", ",M. Lance
Pv16.182,Engraulis mordax,,", ",M. Lance
Pv16.182,Merluccius productus,,", ",M. Lance
Pv16.182,Merluccius productus,,", ",M. Lance
Pv16.182,Platichthys stellatus,,", ",M. Lance
Pv16.182,Platichthys stellatus,,", ",M. Lance
Pv16.182,Pleuronectes vetulus,,", ",M. Lance
Pv16.182,Pleuronectes vetulus,,", ",M. Lance
Pv16.182,Pleuronectes vetulus,,", ",M. Lance
Pv16.182,Pleuronectid spp.,,", ",M. Lance
Pv16.182,Pleuronectid spp.,,", ",M. Lance
Pv16.182,Doryteuthis opalescens,,", ",M. Lance
Pv16.182,Doryteuthis opalescens,,", ",M. Lance
Pv16.183,Cymatogaster aggregata,,", ",M. Lance
Pv16.183,Cymatogaster aggregata,,", ",M. Lance
Pv16.183,Cymatogaster aggregata,,", ",M. Lance
Pv16.183,Engraulis mordax,,", ",M. Lance
Pv16.183,Engraulis mordax,,", ",M. Lance
Pv16.183,Leptocottus armatus,,", ",M. Lance
Pv16.183,Doryteuthis opalescens,,", ",M. Lance
Pv16.183,Doryteuthis opalescens,,", ",M. Lance
Pv16.184,Pleuronectid spp.,,", ",M. Lance
Pv16.184,Pleuronectid spp.,,", ",M. Lance
Pv16.184,Pleuronectid spp.,,", ",M. Lance
Pv16.184,Leptocottus armatus,,", ",M. Lance
Pv16.184,Doryteuthis opalescens,,", ",M. Lance
Pv16.184,Doryteuthis opalescens,,", ",M. Lance
Pv16.185,Oncorhynchus sp.  ,Adult,"Adult,  vertebrae present. Age classification based on exceptionally large vertebral size estimate and teeth",M. Lance
Pv16.186,Osmerid spp.,,", ",M. Lance
Pv16.186,Cymatogaster aggregata,,", ",M. Lance
Pv16.186,Cymatogaster aggregata,,", ",M. Lance
Pv16.186,Theragra chalcogramma,,", ",M. Lance
Pv16.186,Theragra chalcogramma,,", ",M. Lance
Pv16.186,Theragra chalcogramma,,", ",M. Lance
Pv16.186,Doryteuthis opalescens,,", ",M. Lance
Pv16.186,Doryteuthis opalescens,,", ",M. Lance
Pv16.187,Engraulis mordax,,", ",M. Lance
Pv16.187,Engraulis mordax,,", ",M. Lance
Pv16.187,Cottid spp.,,", ",M. Lance
Pv16.187,Gadid or Merluccid,,", ",M. Lance
Pv16.187,Rajid spp.,,", ",M. Lance
Pv16.187,Doryteuthis opalescens,,", ",M. Lance
Pv16.188,Engraulis mordax,,", ",M. Lance
Pv16.188,Engraulis mordax,,", ",M. Lance
Pv16.188,Engraulis mordax,,", ",M. Lance
Pv16.188,Porichthys notatus,,", ",M. Lance
Pv16.188,Porichthys notatus,,", ",M. Lance
Pv16.188,Porichthys notatus,,", ",M. Lance
Pv16.188,Clupea pallasi,,", ",M. Lance
Pv16.188,Clupea pallasi,,", ",M. Lance
Pv16.188,Clupea pallasi,,", ",M. Lance
Pv16.188,Pleuronectid spp.,,", ",M. Lance
Pv16.189,Cymatogaster aggregata,,", ",M. Lance
Pv16.189,Cymatogaster aggregata,,", ",M. Lance
Pv16.189,Cymatogaster aggregata,,", ",M. Lance
Pv16.189,Leptocottus armatus,,", ",M. Lance
Pv16.189,Leptocottus armatus,,", ",M. Lance
Pv16.189,Leptocottus armatus,,", ",M. Lance
Pv16.189,Hemilepidotus spp.,,", ",M. Lance
Pv16.189,Hemilepidotus spp.,,", ",M. Lance
Pv16.189,Hemilepidotus spp.,,", ",M. Lance
Pv16.189,Engraulis mordax,,", ",M. Lance
Pv16.189,Engraulis mordax,,", ",M. Lance
Pv16.189,Porichthys notatus,,", ",M. Lance
Pv16.189,Porichthys notatus,,", ",M. Lance
Pv16.189,Doryteuthis opalescens,,", ",M. Lance
Pv16.189,Doryteuthis opalescens,,", ",M. Lance
Pv16.190,Hemilepidotus spp.,,", ",M. Lance
Pv16.190,Hemilepidotus spp.,,", ",M. Lance
Pv16.190,Hemilepidotus spp.,,", ",M. Lance
Pv16.191,Hemilepidotus spp.,,", ",M. Lance
Pv16.191,Hemilepidotus spp.,,", ",M. Lance
Pv16.191,Hemilepidotus spp.,,", ",M. Lance
Pv16.192,Engraulis mordax,,", ",M. Lance
Pv16.192,Engraulis mordax,,", ",M. Lance
Pv16.192,Engraulis mordax,,", ",M. Lance
Pv16.192,Clupea pallasi,,", ",M. Lance
Pv16.192,Clupea pallasi,,", ",M. Lance
Pv16.192,Clupea pallasi,,", ",M. Lance
Pv16.193,Hemilepidotus spp.,,", ",M. Lance
Pv16.193,Engraulis mordax,,", ",M. Lance
Pv16.193,Engraulis mordax,,", ",M. Lance
Pv16.194,Leptocottus armatus,,", ",M. Lance
Pv16.194,Leptocottus armatus,,", ",M. Lance
Pv16.194,Cymatogaster aggregata,,", ",M. Lance
Pv16.194,Cymatogaster aggregata,,", ",M. Lance
Pv16.194,Cymatogaster aggregata,,", ",M. Lance
Pv16.194,Clupea pallasi,,", ",M. Lance
Pv16.194,Clupea pallasi,,", ",M. Lance
Pv16.194,Clupea pallasi,,", ",M. Lance
Pv16.194,Engraulis mordax,,", ",M. Lance
Pv16.194,Engraulis mordax,,", ",M. Lance
Pv16.194,Engraulis mordax,,", ",M. Lance
Pv16.194,Doryteuthis opalescens,,", ",M. Lance
Pv16.194,Doryteuthis opalescens,,", ",M. Lance
Pv16.195,Cymatogaster aggregata,,", ",M. Lance
Pv16.195,Cymatogaster aggregata,,", ",M. Lance
Pv16.195,Cymatogaster aggregata,,", ",M. Lance
Pv16.195,Porichthys notatus,,", ",M. Lance
Pv16.195,Clupeid spp.,,", ",M. Lance
Pv16.195,Osmerid spp.,,", ",M. Lance
Pv16.195,Osmerid spp.,,", ",M. Lance
Pv16.195,Osmerid spp.,,", ",M. Lance
Pv16.195,Doryteuthis opalescens,,", ",M. Lance
Pv16.195,Doryteuthis opalescens,,", ",M. Lance
Pv16.196,Cymatogaster aggregata,,", ",M. Lance
Pv16.196,Cymatogaster aggregata,,", ",M. Lance
Pv16.196,Cymatogaster aggregata,,", ",M. Lance
Pv16.196,Engraulis mordax,,", ",M. Lance
Pv16.196,Doryteuthis opalescens,,", ",M. Lance
Pv16.196,Doryteuthis opalescens,,", ",M. Lance
Pv16.197,Pleuronectid spp.,,", ",M. Lance
Pv16.197,Pleuronectid spp.,,", ",M. Lance
Pv16.197,Pleuronectid spp.,,", ",M. Lance
Pv16.197,Cottid spp.,,", ",M. Lance
Pv16.198,Pleuronectid spp.,,", ",M. Lance
Pv16.198,Leptocottus armatus,,", ",M. Lance
Pv16.198,Leptocottus armatus,,", ",M. Lance
Pv16.198,Pleuronectes vetulus,,", ",M. Lance
Pv16.198,Pleuronectes vetulus,,", ",M. Lance
Pv16.198,Pleuronectid spp.,,", ",M. Lance
Pv16.198,Doryteuthis opalescens,,", ",M. Lance
Pv16.199,Porichthys notatus,,", ",M. Lance
Pv16.199,Porichthys notatus,,", ",M. Lance
Pv16.199,Porichthys notatus,,", ",M. Lance
Pv16.199,Doryteuthis opalescens,,", ",M. Lance
Pv16.200,Leptocottus armatus,,", ",M. Lance
Pv16.200,Leptocottus armatus,,", ",M. Lance
Pv16.200,Leptocottus armatus,,", ",M. Lance
Pv16.200,Porichthys notatus,,", ",M. Lance
Pv16.200,Porichthys notatus,,", ",M. Lance
Pv16.200,Theragra chalcogramma,,", ",M. Lance
Pv16.201,Rajid spp.,,", ",M. Lance
Pv16.201,Pleuronectes vetulus,,", ",M. Lance
Pv16.201,Pleuronectes vetulus,,", ",M. Lance
Pv16.203,Clupea pallasi,,", ",M. Lance
Pv16.203,Cymatogaster aggregata,,", ",M. Lance
Pv16.203,Cymatogaster aggregata,,", ",M. Lance
Pv16.203,Cymatogaster aggregata,,", ",M. Lance
Pv16.203,Theragra chalcogramma,,", ",M. Lance
Pv16.203,Theragra chalcogramma,,", ",M. Lance
Pv16.203,Theragra chalcogramma,,", ",M. Lance
Pv16.203,Merluccius productus,,", ",M. Lance
Pv16.203,Merluccius productus,,", ",M. Lance
Pv16.203,Merluccius productus,,", ",M. Lance
Pv16.203,Doryteuthis opalescens,,", ",M. Lance
Pv16.203,Octopus rubescens,,", ",M. Lance
Pv16.205,Oncorhynchus kisutch,Juvenile,"juvenile, ot. Originally id'd by WAW as steelhead. Two spproprialy sized coho-type vertebrae confirms id. Change",M. Lance
Pv16.206,Pleuronectes vetulus,,", ",M. Lance
Pv16.206,Pleuronectes vetulus,,", ",M. Lance
Pv16.206,Clupea pallasi,,", ",M. Lance
Pv16.206,Engraulis mordax,,", ",M. Lance
Pv16.206,Cottid spp.,,", ",M. Lance
Pv16.206,Gadid or Merluccid,,", ",M. Lance
Pv16.207,Merluccius productus,,", ",M. Lance
Pv16.207,Merluccius productus,,", ",M. Lance
Pv16.207,Merluccius productus,,", ",M. Lance
Pv16.208,Merluccius productus,,", ",M. Lance
Pv16.208,Merluccius productus,,", ",M. Lance
Pv16.208,Engraulis mordax,,", ",M. Lance
Pv16.208,Engraulis mordax,,", ",M. Lance
Pv16.208,Doryteuthis opalescens,,", ",M. Lance
Pv16.209,Porichthys notatus,,", ",M. Lance
Pv16.209,Porichthys notatus,,", ",M. Lance
Pv16.209,Zoarcid spp.,,", ",M. Lance
Pv16.209,Pleuronectid spp.,,", ",M. Lance
Pv16.209,Pleuronectid spp.,,", ",M. Lance
Pv16.209,Pleuronectid spp.,,", ",M. Lance
Pv16.209,Agonid spp.,,", ",M. Lance
Pv16.209,Agonid spp.,,", ",M. Lance
Pv16.209,Agonid spp.,,", ",M. Lance
Pv16.210,Gadid or Merluccid,,", ",M. Lance
Pv16.210,Gadid or Merluccid,,", ",M. Lance
Pv16.210,Cottid spp.,,", ",M. Lance
Pv16.210,Cottid spp.,,", ",M. Lance
Pv16.210,Cottid spp.,,", ",M. Lance
Pv16.210,Ammodytes hexapteras,,", ",M. Lance
Pv16.210,Ammodytes hexapteras,,", ",M. Lance
Pv16.210,Ammodytes hexapteras,,", ",M. Lance
Pv16.211,Leptocottus armatus,,", ",M. Lance
Pv16.211,Gadid or Merluccid,,", ",M. Lance
Pv16.211,Pleuronectid spp.,,", ",M. Lance
Pv16.211,Pholid spp.,,", ",M. Lance
Pv16.212,Engraulis mordax,,", ",M. Lance
Pv16.212,Unidentifiable fish spp.,,", 4 BONE BITS",M. Lance
Pv16.213,Merluccius productus,,", ",M. Lance
Pv16.213,Merluccius productus,,", ",M. Lance
Pv16.213,Leptocottus armatus,,", ",M. Lance
Pv16.213,Porichthys notatus,,", ",M. Lance
Pv16.214,Hemilepidotus spp.,,", ",M. Lance
Pv16.215,Merluccius productus,,", ",M. Lance
Pv16.215,Merluccius productus,,", ",M. Lance
Pv16.215,Merluccius productus,,", ",M. Lance
Pv16.215,Theragra chalcogramma,,", ",M. Lance
Pv16.215,Theragra chalcogramma,,", ",M. Lance
Pv16.215,Theragra chalcogramma,,", ",M. Lance
Pv16.215,Leptocottus armatus,,", ",M. Lance
Pv16.215,Leptocottus armatus,,", ",M. Lance
Pv16.215,Porichthys notatus,,", ",M. Lance
Pv16.215,Clupeid spp.,,", ",M. Lance
Pv16.216,Porichthys notatus,,", ",M. Lance
Pv16.216,Porichthys notatus,,", ",M. Lance
Pv16.216,Porichthys notatus,,", ",M. Lance
Pv16.216,Doryteuthis opalescens,,", ",M. Lance
Pv16.217,Porichthys notatus,,", ",M. Lance
Pv16.217,Porichthys notatus,,", ",M. Lance
Pv16.217,Porichthys notatus,,", ",M. Lance
Pv16.217,Leptocottus armatus,,", ",M. Lance
Pv16.217,Leptocottus armatus,,", ",M. Lance
Pv16.217,Hemilepidotus spp.,,", ",M. Lance
Pv16.217,Hemilepidotus spp.,,", ",M. Lance
Pv16.217,Hemilepidotus spp.,,", ",M. Lance
Pv16.217,Pleuronectid spp.,,", ",M. Lance
Pv16.217,Pleuronectid spp.,,", ",M. Lance
Pv16.217,Pholid spp.,,", ",M. Lance
Pv16.217,Pholid spp.,,", ",M. Lance
Pv16.217,Doryteuthis opalescens,,", ",M. Lance
Pv16.217,Doryteuthis opalescens,,", ",M. Lance
Pv16.217,Octopus rubescens,,", ",M. Lance
Pv16.218,Rajid spp.,,", ",M. Lance
Pv16.218,Leptocottus armatus,,", ",M. Lance
Pv16.218,Leptocottus armatus,,", ",M. Lance
Pv16.218,Leptocottus armatus,,", ",M. Lance
Pv16.218,Cymatogaster aggregata,,", ",M. Lance
Pv16.218,Cymatogaster aggregata,,", ",M. Lance
Pv16.218,Clupea pallasi,,", ",M. Lance
Pv16.218,Pleuronectid spp.,,", ",M. Lance
Pv16.218,Pleuronectid spp.,,", ",M. Lance
Pv16.218,Pleuronectid spp.,,", ",M. Lance
Pv16.218,Doryteuthis opalescens,,", ",M. Lance
Pv16.220,Pleuronectid spp.,,", ",M. Lance
Pv16.220,Pleuronectid spp.,,", ",M. Lance
Pv16.220,Pleuronectid spp.,,", ",M. Lance
Pv16.220,Leptocottus armatus,,", ",M. Lance
Pv16.220,Leptocottus armatus,,", ",M. Lance
Pv16.221,Unidentifiable fish spp.,,", ",M. Lance
Pv16.222,Hemilepidotus spp.,,", ",M. Lance
Pv16.222,Hemilepidotus spp.,,", ",M. Lance
Pv16.222,Hemilepidotus spp.,,", ",M. Lance
Pv16.222,Engraulis mordax,,", ",M. Lance
Pv16.226,Porichthys notatus,,", ",M. Lance
Pv16.226,Merluccius productus,,", ",M. Lance
Pv16.226,Cottid spp.,,", ",M. Lance
Pv16.244,Oncorhynchus sp.,Juvenile,"juvenile, 1 vertebrae present. Age classification based on vertebral size. Teeth, gillrakers and phayngobrachial also present.",M. Lance
Pv16.245,Clupea pallasi,,", ",M. Lance
Pv16.245,Gadid or Merluccid,,", ",M. Lance
Pv16.246,Theragra chalcogramma,,", ",M. Lance
Pv16.246,Theragra chalcogramma,,", ",M. Lance
Pv16.246,Theragra chalcogramma,,", ",M. Lance
Pv16.246,Merluccius productus,,", ",M. Lance
Pv16.246,Merluccius productus,,", ",M. Lance
Pv16.246,Porichthys notatus,,", ",M. Lance
Pv16.246,Lampetra ayresii,,", ",M. Lance
Pv16.246,Clupea pallasi,,", ",M. Lance
Pv16.246,Clupea pallasi,,", ",M. Lance
Pv16.246,Clupea pallasi,,", ",M. Lance
Pv16.247,Clupea pallasi,,", ",M. Lance
Pv16.247,Alosa sapidissima,,", ",M. Lance
Pv16.247,Merluccius productus,,", ",M. Lance
Pv16.247,Lampetra ayresii,,", ",M. Lance
Pv16.248,Merluccius productus,,", ",M. Lance
Pv16.248,Merluccius productus,,", ",M. Lance
Pv16.248,Merluccius productus,,", ",M. Lance
Pv16.248,Theragra chalcogramma,,", ",M. Lance
Pv16.248,Theragra chalcogramma,,", ",M. Lance
Pv16.248,Theragra chalcogramma,,", ",M. Lance
Pv16.248,Theragra chalcogramma,,", ",M. Lance
Pv16.248,Porichthys notatus,,", ",M. Lance
Pv16.248,Porichthys notatus,,", ",M. Lance
Pv16.248,Clupea pallasi,,", ",M. Lance
Pv16.248,Clupea pallasi,,", ",M. Lance
Pv16.248,Lampetra ayresii,,", ",M. Lance
Pv16.249,Clupea pallasi,,", ",M. Lance
Pv16.249,Clupea pallasi,,", ",M. Lance
Pv16.249,Cymatogaster aggregata,,", ",M. Lance
Pv16.249,Cymatogaster aggregata,,", ",M. Lance
Pv16.250,Clupea pallasi,,", ",M. Lance
Pv16.250,Lampetra ayresii,,", ",M. Lance
Pv16.250,Alosa sapidissima,,", ",M. Lance
Pv16.250,Merluccius productus,,", ",M. Lance
Pv16.250,Merluccius productus,,", ",M. Lance
Pv16.250,Merluccius productus,,", ",M. Lance
Pv16.251,Lampetra ayresii,,", ",M. Lance
Pv16.251,Merluccius productus,,", ",M. Lance
Pv16.251,Clupea pallasi,,", ",M. Lance
Pv16.252,Oncorhynchus sp.,Adult,"Adult, ",M. Lance
Pv16.252,Oncorhynchus sp.,Juvenile,"juvenile, ",M. Lance
Pv16.253,Porichthys notatus,,", ",M. Lance
Pv16.253,Porichthys notatus,,", ",M. Lance
Pv16.253,Porichthys notatus,,", ",M. Lance
Pv16.253,Theragra chalcogramma,,", ",M. Lance
Pv16.253,Theragra chalcogramma,,", ",M. Lance
Pv16.253,Theragra chalcogramma,,", ",M. Lance
Pv16.253,Merluccius productus,,", ",M. Lance
Pv16.253,Merluccius productus,,", ",M. Lance
Pv16.253,Merluccius productus,,", ",M. Lance
Pv16.253,Leptocottus armatus,,", ",M. Lance
Pv16.253,Leptocottus armatus,,", ",M. Lance
Pv16.253,Leptocottus armatus,,", ",M. Lance
Pv16.253,Rajid spp.,,", ",M. Lance
Pv16.253,Hemilepidotus spp.,,", ",M. Lance
Pv16.253,Hemilepidotus spp.,,", ",M. Lance
Pv16.254,Porichthys notatus,,", ",M. Lance
Pv16.254,Porichthys notatus,,", ",M. Lance
Pv16.254,Porichthys notatus,,", ",M. Lance
Pv16.254,Lampetra ayresii,,", ",M. Lance
Pv16.254,Alosa sapidissima,,", ",M. Lance
Pv16.254,Merluccius productus,,", ",M. Lance
Pv16.254,Merluccius productus,,", ",M. Lance
Pv16.254,Merluccius productus,,", ",M. Lance
Pv16.254,Theragra chalcogramma,,", ",M. Lance
Pv16.254,Theragra chalcogramma,,", ",M. Lance
Pv16.254,Theragra chalcogramma,,", ",M. Lance
Pv16.254,Clupea pallasi,,", ",M. Lance
Pv16.254,Clupea pallasi,,", ",M. Lance
Pv16.255,Porichthys notatus,,", ",M. Lance
Pv16.255,Gadid or Merluccid,,", ",M. Lance
Pv16.255,Clupea pallasi,,", ",M. Lance
Pv16.256,Clupea pallasi,,", ",M. Lance
Pv16.256,Porichthys notatus,,", ",M. Lance
Pv16.257,Porichthys notatus,,", ",M. Lance
Pv16.257,Porichthys notatus,,", ",M. Lance
Pv16.257,Porichthys notatus,,", ",M. Lance
Pv16.257,Theragra chalcogramma,,", ",M. Lance
Pv16.257,Theragra chalcogramma,,", ",M. Lance
Pv16.257,Cymatogaster aggregata,,", ",M. Lance
Pv16.257,Cymatogaster aggregata,,", ",M. Lance
Pv16.257,Cymatogaster aggregata,,", ",M. Lance
Pv16.257,Leptocottus armatus,,", ",M. Lance
Pv16.257,Leptocottus armatus,,", ",M. Lance
Pv16.257,Leptocottus armatus,,", ",M. Lance
Pv16.257,Hemilepidotus spp.,,", ",M. Lance
Pv16.257,Hemilepidotus spp.,,", ",M. Lance
Pv16.257,Hemilepidotus spp.,,", ",M. Lance
Pv16.257,Pleuronectid spp.,,", ",M. Lance
Pv16.257,Pleuronectid spp.,,", ",M. Lance
Pv16.258,Porichthys notatus,,", ",M. Lance
Pv16.258,Porichthys notatus,,", ",M. Lance
Pv16.258,Porichthys notatus,,", ",M. Lance
Pv16.258,Rajid spp.,,", ",M. Lance
Pv16.258,Leptocottus armatus,,", ",M. Lance
Pv16.258,Leptocottus armatus,,", ",M. Lance
Pv16.258,Leptocottus armatus,,", ",M. Lance
Pv16.258,Theragra chalcogramma,,", ",M. Lance
Pv16.258,Theragra chalcogramma,,", ",M. Lance
Pv16.258,Theragra chalcogramma,,", ",M. Lance
Pv16.258,Merluccius productus,,", ",M. Lance
Pv16.258,Merluccius productus,,", ",M. Lance
Pv16.258,Merluccius productus,,", ",M. Lance
Pv16.259,Pleuronectid spp.,,", ",M. Lance
Pv16.259,Pleuronectid spp.,,", ",M. Lance
Pv16.259,Pleuronectid spp.,,", ",M. Lance
Pv16.259,Porichthys notatus,,", ",M. Lance
Pv16.259,Porichthys notatus,,", ",M. Lance
Pv16.259,Porichthys notatus,,", ",M. Lance
Pv16.259,Leptocottus armatus,,", ",M. Lance
Pv16.259,Leptocottus armatus,,", ",M. Lance
Pv16.259,Leptocottus armatus,,", ",M. Lance
Pv16.260,Theragra chalcogramma,,", ",M. Lance
Pv16.260,Theragra chalcogramma,,", ",M. Lance
Pv16.260,Theragra chalcogramma,,", ",M. Lance
Pv16.260,Cymatogaster aggregata,,", ",M. Lance
Pv16.260,Cymatogaster aggregata,,", ",M. Lance
Pv16.260,Cymatogaster aggregata,,", ",M. Lance
Pv16.260,Leptocottus armatus,,", ",M. Lance
Pv16.260,Leptocottus armatus,,", ",M. Lance
Pv16.261,Oncorhynchus sp.  ,Adult,"sub-adult ?, No vertebrae present. Age classification based on intermediate-size  gillrakers.",M. Lance
Pv16.261,Peprilus simillimus,,", ",M. Lance
Pv16.261,Lycodes diapterus,,", ",M. Lance
Pv16.263,Unidentifiable fish spp.,,", ",M. Lance
Pv16.264,Merluccius productus,,", ",M. Lance
Pv16.264,Merluccius productus,,", ",M. Lance
Pv16.264,Platichthys stellatus,,", ",M. Lance
Pv16.264,Platichthys stellatus,,", ",M. Lance
Pv16.265,Oncorhynchus sp.  ,Adult,"Adult,  vertebrae present. Age classification based on large vertebral size estimate and very large teeth.",M. Lance
Pv16.267,Theragra chalcogramma,,", ",M. Lance
Pv16.267,Theragra chalcogramma,,", ",M. Lance
Pv16.267,Theragra chalcogramma,,", ",M. Lance
Pv16.267,Porichthys notatus,,", ",M. Lance
Pv16.267,Porichthys notatus,,", ",M. Lance
Pv16.267,Leptocottus armatus,,", ",M. Lance
Pv16.267,Leptocottus armatus,,", ",M. Lance
Pv16.267,Cymatogaster aggregata,,", ",M. Lance
Pv16.267,Cymatogaster aggregata,,", ",M. Lance
Pv16.267,Doryteuthis opalescens,,", ",M. Lance
Pv16.268,Engraulis mordax,,", ",M. Lance
Pv16.269,Unidentifiable fish spp.,,", ",M. Lance
Pv16.269,Doryteuthis opalescens,,", ",M. Lance
Pv16.270,Ammodytes hexapteras,,", ",M. Lance
Pv16.270,Ammodytes hexapteras,,", ",M. Lance
Pv16.270,Theragra chalcogramma,,", ",M. Lance
Pv16.270,Theragra chalcogramma,,", ",M. Lance
Pv16.270,Theragra chalcogramma,,", ",M. Lance
Pv16.270,Merluccius productus,,", ",M. Lance
Pv16.270,Merluccius productus,,", ",M. Lance
Pv16.270,Engraulis mordax,,", ",M. Lance
Pv16.270,Engraulis mordax,,", ",M. Lance
Pv16.270,Alosa sapidissima,,", ",M. Lance
Pv16.270,Cymatogaster aggregata,,", ",M. Lance
Pv16.270,Cymatogaster aggregata,,", ",M. Lance
Pv16.270,Leptocottus armatus,,", ",M. Lance
Pv16.270,Leptocottus armatus,,", ",M. Lance
Pv16.270,Leptocottus armatus,,", ",M. Lance
Pv16.270,Porichthys notatus,,", ",M. Lance
Pv16.271,Porichthys notatus,,", ",M. Lance
Pv16.271,Porichthys notatus,,", ",M. Lance
Pv16.271,Theragra chalcogramma,,", ",M. Lance
Pv16.271,Theragra chalcogramma,,", ",M. Lance
Pv16.271,Leptocottus armatus,,", ",M. Lance
Pv16.271,Leptocottus armatus,,", ",M. Lance
Pv16.271,Leptocottus armatus,,", ",M. Lance
Pv16.272,Leptocottus armatus,,", ",M. Lance
Pv16.272,Leptocottus armatus,,", ",M. Lance
Pv16.272,Leptocottus armatus,,", ",M. Lance
Pv16.272,Porichthys notatus,,", ",M. Lance
Pv16.272,Porichthys notatus,,", ",M. Lance
Pv16.272,Microgadus proximus,,", ",M. Lance
Pv16.272,Microgadus proximus,,", ",M. Lance
Pv16.272,Microgadus proximus,,", ",M. Lance
Pv16.273,Pleuronectid spp.,,", ",M. Lance
Pv16.273,Pleuronectid spp.,,", ",M. Lance
Pv16.273,Pleuronectid spp.,,", ",M. Lance
Pv16.274,Pleuronectes vetulus,,", ",M. Lance
Pv16.274,Pleuronectes vetulus,,", ",M. Lance
Pv16.274,Pleuronectes vetulus,,", ",M. Lance
Pv16.274,Pleuronectid spp.,,", ",M. Lance
Pv16.274,Pleuronectid spp.,,", ",M. Lance
Pv16.274,Pleuronectid spp.,,", ",M. Lance
Pv16.275,Platichthys stellatus,,", ",M. Lance
Pv16.275,Platichthys stellatus,,", ",M. Lance
Pv16.276,Porichthys notatus,,", ",M. Lance
Pv16.276,Porichthys notatus,,", ",M. Lance
Pv16.276,Merluccius productus,,", ",M. Lance
Pv16.276,Merluccius productus,,", ",M. Lance
Pv16.276,Pleuronectes vetulus,,", ",M. Lance
Pv16.276,Pleuronectes vetulus,,", ",M. Lance
Pv16.276,Pleuronectid spp.,,", ",M. Lance
Pv16.276,Pleuronectid spp.,,", ",M. Lance
Pv16.278,Oncorhynchus sp.,Juvenile,"smolt,  vertebrae present. Age classification based on tiny vertebral size.",M. Lance
Pv16.287,Pleuronectes vetulus,,", ",M. Lance
Pv16.287,Pleuronectes vetulus,,", ",M. Lance
Pv16.287,Pleuronectes vetulus,,", ",M. Lance
Pv16.288,Leptocottus armatus,,", ",M. Lance
Pv16.288,Leptocottus armatus,,", ",M. Lance
Pv16.288,Leptocottus armatus,,", ",M. Lance
Pv16.288,Porichthys notatus,,", ",M. Lance
Pv16.288,Porichthys notatus,,", ",M. Lance
Pv16.288,Cymatogaster aggregata,,", ",M. Lance
Pv16.288,Cymatogaster aggregata,,", ",M. Lance
Pv16.288,Cymatogaster aggregata,,", ",M. Lance
Pv16.288,Pleuronectid spp.,,", ",M. Lance
Pv16.290,Pleuronectid spp.,,", ",M. Lance
Pv16.290,Pleuronectid spp.,,", ",M. Lance
Pv16.290,Pleuronectid spp.,,", ",M. Lance
Pv16.290,Clupea pallasi,,", ",M. Lance
Pv16.290,Clupea pallasi,,", ",M. Lance
Pv16.290,Leptocottus armatus,,", ",M. Lance
Pv16.291,Oncorhynchus tshawytscha,Juvenile,"juvenile, ",M. Lance
Pv16.293,Merluccius productus,,", ",M. Lance
Pv16.293,Merluccius productus,,", ",M. Lance
Pv16.294,Clupea pallasi,,", ",M. Lance
Pv16.295,Oncorhynchus sp.  ,Juvenile,"smolt,  vertebrae present. Age classification not practical - vertebrae too small",M. Lance
Pv16.295,Aulorhynchus flavidus,,", ",M. Lance
Pv16.298,Oncorhynchus kisutch,Juvenile,"smolt, ",M. Lance
Pv16.299,Merluccius productus,,", ",M. Lance
Pv16.299,Merluccius productus,,", ",M. Lance
Pv16.299,Clupea pallasi,,", ",M. Lance
Pv16.301,Merluccius productus,,", ",M. Lance
Pv16.301,Merluccius productus,,", ",M. Lance
Pv16.301,Merluccius productus,,", ",M. Lance
Pv16.301,Theragra chalcogramma,,", ",M. Lance
Pv16.301,Theragra chalcogramma,,", ",M. Lance
Pv16.303,Porichthys notatus,,", ",M. Lance
Pv16.303,Porichthys notatus,,", ",M. Lance
Pv16.303,Porichthys notatus,,", ",M. Lance
Pv16.303,Merluccius productus,,", ",M. Lance
Pv16.303,Merluccius productus,,", ",M. Lance
Pv16.303,Merluccius productus,,", ",M. Lance
Pv16.303,Pholid spp.,,", ",M. Lance
Pv16.303,Pholid spp.,,", ",M. Lance
Pv16.304,Clupea pallasi,,", ",M. Lance
Pv16.304,Gadid or Merluccid,,", ",M. Lance
Pv16.304,Unidentifiable fish spp.,,", ",M. Lance
Pv16.305,Clupeid spp.,,", ",M. Lance
Pv16.305,Porichthys notatus,,", ",M. Lance
Pv16.305,Porichthys notatus,,", ",M. Lance
Pv16.305,Porichthys notatus,,", ",M. Lance
Pv16.305,Cymatogaster aggregata,,", ",M. Lance
Pv16.305,Cymatogaster aggregata,,", ",M. Lance
Pv16.305,Merluccius productus,,", ",M. Lance
Pv16.305,Merluccius productus,,", ",M. Lance
Pv16.305,Pleuronectid spp.,,", ",M. Lance
Pv16.305,Doryteuthis opalescens,,", ",M. Lance
Pv16.305,Doryteuthis opalescens,,", ",M. Lance
Pv16.306,Alosa sapidissima,,", ",M. Lance
Pv16.306,Gadid or Merluccid,,", ",M. Lance
Pv16.308,Theragra chalcogramma,,", ",M. Lance
Pv16.308,Theragra chalcogramma,,", ",M. Lance
Pv16.308,Theragra chalcogramma,,", ",M. Lance
Pv16.308,Cymatogaster aggregata,,", ",M. Lance
Pv16.308,Cymatogaster aggregata,,", ",M. Lance
Pv16.308,Cymatogaster aggregata,,", ",M. Lance
Pv16.308,Clupeid spp.,,", ",M. Lance
Pv16.309,Hemilepidotus spp.,,", ",M. Lance
Pv16.309,Hemilepidotus spp.,,", ",M. Lance
Pv16.311,Porichthys notatus,,", ",M. Lance
Pv16.311,Porichthys notatus,,", ",M. Lance
Pv16.313,Cottid spp.,,", ",M. Lance
Pv16.314,Porichthys notatus,,", ",M. Lance
Pv16.314,Porichthys notatus,,", ",M. Lance
Pv16.314,Porichthys notatus,,", ",M. Lance
Pv16.314,Alosa sapidissima,,", ",M. Lance
Pv16.316,Cymatogaster aggregata,,", ",M. Lance
Pv16.316,Cymatogaster aggregata,,", ",M. Lance
Pv16.316,Cymatogaster aggregata,,", ",M. Lance
Pv16.316,Theragra chalcogramma,,", ",M. Lance
Pv16.316,Theragra chalcogramma,,", ",M. Lance
Pv16.316,Theragra chalcogramma,,", ",M. Lance
Pv16.316,Lampetra ayresii,,", ",M. Lance
Pv16.316,Doryteuthis opalescens,,", ",M. Lance
Pv16.316,Doryteuthis opalescens,,", ",M. Lance
Pv16.317,Rajid spp.,,", ",M. Lance
Pv16.317,Leptocottus armatus,,", ",M. Lance
Pv16.317,Leptocottus armatus,,", ",M. Lance
Pv16.317,Theragra chalcogramma,,", ",M. Lance
Pv16.317,Theragra chalcogramma,,", ",M. Lance
Pv16.317,Theragra chalcogramma,,", ",M. Lance
Pv16.317,Merluccius productus,,", ",M. Lance
Pv16.317,Merluccius productus,,", ",M. Lance
Pv16.317,Merluccius productus,,", ",M. Lance
Pv16.318,Leptocottus armatus,,", ",M. Lance
Pv16.318,Leptocottus armatus,,", ",M. Lance
Pv16.318,Damalichthys vacca,,", ",M. Lance
Pv16.318,Damalichthys vacca,,", ",M. Lance
Pv16.318,Clupeid spp.,,", ",M. Lance
Pv16.318,Pleuronectid spp.,,", ",M. Lance
Pv16.318,Gadid or Merluccid,,", ",M. Lance
Pv16.319,Porichthys notatus,,", ",M. Lance
Pv16.319,Porichthys notatus,,", ",M. Lance
Pv16.319,Porichthys notatus,,", ",M. Lance
Pv16.319,Theragra chalcogramma,,", ",M. Lance
Pv16.319,Theragra chalcogramma,,", ",M. Lance
Pv16.319,Theragra chalcogramma,,", ",M. Lance
Pv16.319,Clupea pallasi,,", ",M. Lance
Pv16.319,Clupea pallasi,,", ",M. Lance
Pv16.319,Clupea pallasi,,", ",M. Lance
Pv16.319,Cymatogaster aggregata,,", ",M. Lance
Pv16.319,Cymatogaster aggregata,,", ",M. Lance
Pv16.319,Cymatogaster aggregata,,", ",M. Lance
Pv16.319,Hemilepidotus spp.,,", ",M. Lance
Pv16.319,Hemilepidotus spp.,,", ",M. Lance
Pv16.319,Hemilepidotus spp.,,", ",M. Lance
Pv16.319,Octopus rubescens,,", ",M. Lance
Pv16.319,Doryteuthis opalescens,,", ",M. Lance
Pv16.319,Doryteuthis opalescens,,", ",M. Lance
Pv16.320,Unidentifiable fish spp.,,", ",M. Lance
Pv16.320,Doryteuthis opalescens,,", ",M. Lance
Pv16.321,Porichthys notatus,,", ",M. Lance
Pv16.321,Porichthys notatus,,", ",M. Lance
Pv16.321,Porichthys notatus,,", ",M. Lance
Pv16.321,Leptocottus armatus,,", ",M. Lance
Pv16.321,Leptocottus armatus,,", ",M. Lance
Pv16.321,Pleuronectes vetulus,,", ",M. Lance
Pv16.321,Pleuronectes vetulus,,", ",M. Lance
Pv16.321,Pleuronectes vetulus,,", ",M. Lance
Pv16.321,Pleuronectid spp.,,", ",M. Lance
Pv16.321,Pleuronectid spp.,,", ",M. Lance
Pv16.321,Pleuronectid spp.,,", ",M. Lance
Pv16.322,Pleuronectid spp.,,", ",M. Lance
Pv16.323,Cottid spp.,,", ",M. Lance
Pv16.324,Pleuronectid spp.,,", ",M. Lance
Pv16.325,Porichthys notatus,,", ",M. Lance
Pv16.325,Leptocottus armatus,,", ",M. Lance
Pv16.326,Doryteuthis opalescens,,", ",M. Lance
Pv16.326,Doryteuthis opalescens,,", ",M. Lance
Pv16.326,Porichthys notatus,,", ",M. Lance
Pv16.327,Leptocottus armatus,,", ",M. Lance
Pv16.328,Oncorhynchus tshawytscha,Juvenile,"juvenile, 1 abdominal vertebrae present. Age classification based on small vertebral size.",M. Lance
Pv16.329,Cymatogaster aggregata,,", ",M. Lance
Pv16.329,Cymatogaster aggregata,,", ",M. Lance
Pv16.329,Clupea pallasi,,", ",M. Lance
Pv16.329,Doryteuthis opalescens,,", ",M. Lance
Pv16.329,Octopus rubescens,,", ",M. Lance
Pv16.331,Leptocottus armatus,,", ",M. Lance
Pv16.331,Leptocottus armatus,,", ",M. Lance
Pv16.331,Pleuronectid spp.,,", ",M. Lance
Pv16.331,Pleuronectid spp.,,", ",M. Lance
Pv16.331,Pleuronectid spp.,,", ",M. Lance
Pv16.331,Doryteuthis opalescens,,", ",M. Lance
Pv16.331,Doryteuthis opalescens,,", ",M. Lance
Pv16.332,Clupeid spp.,,", ",M. Lance
Pv16.332,Cymatogaster aggregata,,", ",M. Lance
Pv16.332,Cymatogaster aggregata,,", ",M. Lance
Pv16.332,Cymatogaster aggregata,,", ",M. Lance
Pv16.332,Doryteuthis opalescens,,", ",M. Lance
Pv16.332,Doryteuthis opalescens,,", ",M. Lance
Pv16.333,Leptocottus armatus,,", ",M. Lance
Pv16.333,Leptocottus armatus,,", ",M. Lance
Pv16.333,Hemilepidotus spp.,,", ",M. Lance
Pv16.333,Hemilepidotus spp.,,", ",M. Lance
Pv16.333,Hemilepidotus spp.,,", ",M. Lance
Pv16.333,Doryteuthis opalescens,,", ",M. Lance
Pv16.333,Doryteuthis opalescens,,", ",M. Lance
Pv16.334,Leptocottus armatus,,", ",M. Lance
Pv16.334,Leptocottus armatus,,", ",M. Lance
Pv16.334,Leptocottus armatus,,", ",M. Lance
Pv16.334,Hemilepidotus spp.,,", ",M. Lance
Pv16.334,Hemilepidotus spp.,,", ",M. Lance
Pv16.334,Hemilepidotus spp.,,", ",M. Lance
Pv16.334,Pleuronectid spp.,,", ",M. Lance
Pv16.334,Pleuronectid spp.,,", ",M. Lance
Pv16.334,Doryteuthis opalescens,,", ",M. Lance
Pv16.334,Doryteuthis opalescens,,", ",M. Lance
Pv16.336,Gadid or Merluccid,,", ",M. Lance
Pv16.336,Clupeid spp.,,", ",M. Lance
Pv16.336,Doryteuthis opalescens,,", ",M. Lance
Pv16.337,Hemilepidotus spp.,,", ",M. Lance
Pv16.337,Hemilepidotus spp.,,", ",M. Lance
Pv16.337,Hemilepidotus spp.,,", ",M. Lance
Pv16.337,Pholid spp.,,", ",M. Lance
Pv16.339,Porichthys notatus,,", ",M. Lance
Pv16.339,Porichthys notatus,,", ",M. Lance
Pv16.339,Porichthys notatus,,", ",M. Lance
Pv16.339,Pleuronectid spp.,,", ",M. Lance
Pv16.339,Pleuronectid spp.,,", ",M. Lance
Pv16.339,Pleuronectid spp.,,", ",M. Lance
Pv16.339,Pleuronectes vetulus,,", ",M. Lance
Pv16.339,Pleuronectes vetulus,,", ",M. Lance
Pv16.339,Rajid spp.,,", ",M. Lance
Pv16.339,Leptocottus armatus,,", ",M. Lance
Pv16.339,Leptocottus armatus,,", ",M. Lance
Pv16.339,Alosa sapidissima,,", ",M. Lance
Pv16.339,Doryteuthis opalescens,,", ",M. Lance
Pv16.340,Leptocottus armatus,,", ",M. Lance
Pv16.340,Leptocottus armatus,,", ",M. Lance
Pv16.340,Doryteuthis opalescens,,", ",M. Lance
Pv16.340,Doryteuthis opalescens,,", ",M. Lance
Pv16.340,Octopus rubescens,,", ",M. Lance
Pv16.341,Hemilepidotus spp.,,", ",M. Lance
Pv16.341,Hemilepidotus spp.,,", ",M. Lance
Pv16.341,Hemilepidotus spp.,,", ",M. Lance
Pv16.341,Doryteuthis opalescens,,", ",M. Lance
Pv16.343,Alosa sapidissima,,", ",M. Lance
Pv16.343,Alosa sapidissima,,", ",M. Lance
Pv16.343,Doryteuthis opalescens,,", ",M. Lance
Pv16.344,Hemilepidotus spp.,,", ",M. Lance
Pv16.344,Hemilepidotus spp.,,", ",M. Lance
Pv16.344,Hemilepidotus spp.,,", ",M. Lance
Pv16.344,Doryteuthis opalescens,,", ",M. Lance
Pv16.344,Doryteuthis opalescens,,", ",M. Lance
Pv16.344,Octopus rubescens,,", ",M. Lance
Pv16.344,Octopus rubescens,,", ",M. Lance
Pv16.345,Cymatogaster aggregata,,", ",M. Lance
Pv16.345,Cymatogaster aggregata,,", ",M. Lance
Pv16.345,Cymatogaster aggregata,,", ",M. Lance
Pv16.345,Hemilepidotus spp.,,", ",M. Lance
Pv16.345,Hemilepidotus spp.,,", ",M. Lance
Pv16.345,Hemilepidotus spp.,,", ",M. Lance
Pv16.345,Leptocottus armatus,,", ",M. Lance
Pv16.345,Leptocottus armatus,,", ",M. Lance
Pv16.345,Leptocottus armatus,,", ",M. Lance
Pv16.345,Zoarcid spp.,,", ",M. Lance
Pv16.345,Zoarcid spp.,,", ",M. Lance
Pv16.345,Liparid spp.,,", ",M. Lance
Pv16.345,Liparid spp.,,", ",M. Lance
Pv16.345,Doryteuthis opalescens,,", ",M. Lance
Pv16.345,Doryteuthis opalescens,,", ",M. Lance
Pv16.345,Octopus rubescens,,", ",M. Lance
Pv16.345,Octopus rubescens,,", ",M. Lance
Pv16.346,Leptocottus armatus,,", ",M. Lance
Pv16.346,Leptocottus armatus,,", ",M. Lance
Pv16.346,Leptocottus armatus,,", ",M. Lance
Pv16.346,Porichthys notatus,,", ",M. Lance
Pv16.346,Porichthys notatus,,", ",M. Lance
Pv16.346,Engraulis mordax,,", ",M. Lance
Pv16.346,Microgadus proximus,,", ",M. Lance
Pv16.346,Microgadus proximus,,", ",M. Lance
Pv16.346,Doryteuthis opalescens,,", ",M. Lance
Pv16.346,Doryteuthis opalescens,,", ",M. Lance
Pv16.347,Clupea pallasi,,", ",M. Lance
Pv16.347,Clupea pallasi,,", ",M. Lance
Pv16.347,Clupea pallasi,,", ",M. Lance
Pv16.347,Doryteuthis opalescens,,", ",M. Lance
Pv16.348,Oncorhynchus tshawytscha,Juvenile,"juvenile, vertebrae present, no other remains. Age classification based on vertebral size.",M. Lance
Pv16.351,Hemilepidotus spp.,,", ",M. Lance
Pv16.351,Hemilepidotus spp.,,", ",M. Lance
Pv16.351,Hemilepidotus spp.,,", ",M. Lance
Pv16.351,Pleuronectid spp.,,", ",M. Lance
Pv16.351,Pleuronectid spp.,,", ",M. Lance
Pv16.351,Doryteuthis opalescens,,", ",M. Lance
Pv16.351,Doryteuthis opalescens,,", ",M. Lance
Pv16.352,Leptocottus armatus,,", ",M. Lance
Pv16.352,Leptocottus armatus,,", ",M. Lance
Pv16.352,Cymatogaster aggregata,,", ",M. Lance
Pv16.352,Cymatogaster aggregata,,", ",M. Lance
Pv16.352,Alosa sapidissima,,", ",M. Lance
Pv16.352,Doryteuthis opalescens,,", ",M. Lance
Pv16.352,Doryteuthis opalescens,,", ",M. Lance
Pv16.353,Oncorhynchus sp.  ,Juvenile,"juvenile, 1 pc vertebrae and one small tooth present. Age classification based on small estimated vertebral size.",M. Lance
Pv16.354,Leptocottus armatus,,", ",M. Lance
Pv16.354,Leptocottus armatus,,", ",M. Lance
Pv16.354,Porichthys notatus,,", ",M. Lance
Pv16.354,Porichthys notatus,,", ",M. Lance
Pv16.354,Pleuronectid spp.,,", ",M. Lance
Pv16.354,Pleuronectid spp.,,", ",M. Lance
Pv16.354,Pleuronectid spp.,,", ",M. Lance
Pv16.354,Doryteuthis opalescens,,", ",M. Lance
Pv16.355,Theragra chalcogramma,,", ",M. Lance
Pv16.355,Theragra chalcogramma,,", ",M. Lance
Pv16.355,Cottid spp.,,", ",M. Lance
Pv16.355,Doryteuthis opalescens,,", ",M. Lance
Pv16.355,Doryteuthis opalescens,,", ",M. Lance
Pv16.356,Clupea pallasi,,", ",M. Lance
Pv16.356,Pleuronectes vetulus,,", ",M. Lance
Pv16.356,Pleuronectes vetulus,,", ",M. Lance
Pv16.356,Pleuronectes vetulus,,", ",M. Lance
Pv16.356,Doryteuthis opalescens,,", ",M. Lance
Pv16.356,Doryteuthis opalescens,,", ",M. Lance
Pv16.357,Theragra chalcogramma,,", ",M. Lance
Pv16.357,Theragra chalcogramma,,", ",M. Lance
Pv16.357,Cottid spp.,,", ",M. Lance
Pv16.357,Pleuronectid spp.,,", ",M. Lance
Pv16.358,Leptocottus armatus,,", ",M. Lance
Pv16.358,Porichthys notatus,,", ",M. Lance
Pv16.358,Porichthys notatus,,", ",M. Lance
Pv16.358,Porichthys notatus,,", ",M. Lance
Pv16.358,Rajid spp.,,", ",M. Lance
Pv16.358,Pholid spp.,,", ",M. Lance
Pv16.358,Gadid or Merluccid,,", ",M. Lance
Pv16.358,Leptocottus armatus,,", ",M. Lance
Pv16.358,Leptocottus armatus,,", ",M. Lance
Pv16.358,Doryteuthis opalescens,,", ",M. Lance
Pv16.358,Doryteuthis opalescens,,", ",M. Lance
Pv16.359,Cymatogaster aggregata,,", ",M. Lance
Pv16.359,Cymatogaster aggregata,,", ",M. Lance
Pv16.359,Cymatogaster aggregata,,", ",M. Lance
Pv16.359,Stichaeid spp.,,", ",M. Lance
Pv16.359,Gadid or Merluccid,,", ",M. Lance
Pv16.359,Leptocottus armatus,,", ",M. Lance
Pv16.359,Doryteuthis opalescens,,", ",M. Lance
Pv16.359,Doryteuthis opalescens,,", ",M. Lance
Pv16.360,Clupea pallasi,,", ",M. Lance
Pv16.360,Engraulis mordax,,", ",M. Lance
Pv16.360,Doryteuthis opalescens,,", ",M. Lance
Pv16.360,Doryteuthis opalescens,,", ",M. Lance
Pv16.361,Oncorhynchus tshawytscha,Juvenile,"juvenile, ",M. Lance
Pv16.362,Oncorhynchus sp.  ,Juvenile,"juvenile, 1 pc vertebra fragment and one small gillraker present. Age classification based on size of small vertebral fragment.",M. Lance
Pv16.362,Aulorhynchus flavidus,,", ",M. Lance
Pv16.364,Leptocottus armatus,,", ",M. Lance
Pv16.364,Leptocottus armatus,,", ",M. Lance
Pv16.364,Leptocottus armatus,,", ",M. Lance
Pv16.364,Porichthys notatus,,", ",M. Lance
Pv16.364,Porichthys notatus,,", ",M. Lance
Pv16.364,Porichthys notatus,,", ",M. Lance
Pv16.364,Pleuronectes vetulus,,", ",M. Lance
Pv16.364,Pleuronectes vetulus,,", ",M. Lance
Pv16.364,Gadid or Merluccid,,", ",M. Lance
Pv16.364,Gadid or Merluccid,,", ",M. Lance
Pv16.364,Rajid spp.,,", ",M. Lance
Pv16.364,Doryteuthis opalescens,,", ",M. Lance
Pv16.365,Leptocottus armatus,,", ",M. Lance
Pv16.365,Leptocottus armatus,,", ",M. Lance
Pv16.365,Porichthys notatus,,", ",M. Lance
Pv16.366,Leptocottus armatus,,", ",M. Lance
Pv16.366,Leptocottus armatus,,", ",M. Lance
Pv16.366,Leptocottus armatus,,", ",M. Lance
Pv16.366,Porichthys notatus,,", ",M. Lance
Pv16.366,Porichthys notatus,,", ",M. Lance
Pv16.366,Porichthys notatus,,", ",M. Lance
Pv16.366,Theragra chalcogramma,,", ",M. Lance
Pv16.367,Engraulis mordax,,", ",M. Lance
Pv16.367,Engraulis mordax,,", ",M. Lance
Pv16.367,Engraulis mordax,,", ",M. Lance
Pv16.367,Ammodytes hexapteras,,", ",M. Lance
Pv16.367,Ammodytes hexapteras,,", ",M. Lance
Pv16.368,Merluccius productus,,", ",M. Lance
Pv16.368,Merluccius productus,,", ",M. Lance
Pv16.369,Porichthys notatus,,", ",M. Lance
Pv16.369,Porichthys notatus,,", ",M. Lance
Pv16.369,Porichthys notatus,,", ",M. Lance
Pv16.369,Doryteuthis opalescens,,", ",M. Lance
Pv16.370,Leptocottus armatus,,", ",M. Lance
Pv16.370,Leptocottus armatus,,", ",M. Lance
Pv16.370,Leptocottus armatus,,", ",M. Lance
Pv16.370,Gadid or Merluccid,,", ",M. Lance
Pv16.370,Gadid or Merluccid,,", ",M. Lance
Pv16.370,Porichthys notatus,,", ",M. Lance
Pv16.370,Porichthys notatus,,", ",M. Lance
Pv16.370,Liparid spp.,,", ",M. Lance
Pv16.370,Liparid spp.,,", ",M. Lance
Pv16.370,Liparid spp.,,", ",M. Lance
Pv16.370,Octopus rubescens,,", ",M. Lance
Pv16.370,Octopus rubescens,,", ",M. Lance
Pv16.371,Gadid or Merluccid,,", ",M. Lance
Pv16.372,Porichthys notatus,,", ",M. Lance
Pv16.372,Porichthys notatus,,", ",M. Lance
Pv16.372,Porichthys notatus,,", ",M. Lance
Pv16.372,Merluccius productus,,", ",M. Lance
Pv16.372,Merluccius productus,,", ",M. Lance
Pv16.372,Leptocottus armatus,,", ",M. Lance
Pv16.372,Leptocottus armatus,,", ",M. Lance
Pv16.372,Leptocottus armatus,,", ",M. Lance
Pv16.372,Doryteuthis opalescens,,", ",M. Lance
Pv16.372,Doryteuthis opalescens,,", ",M. Lance
Pv16.373,Cymatogaster aggregata,,", ",M. Lance
Pv16.373,Cymatogaster aggregata,,", ",M. Lance
Pv16.373,Cymatogaster aggregata,,", ",M. Lance
Pv16.373,Doryteuthis opalescens,,", ",M. Lance
Pv16.373,Doryteuthis opalescens,,", ",M. Lance
Pv16.374,Porichthys notatus,,", ",M. Lance
Pv16.374,Porichthys notatus,,", ",M. Lance
Pv16.375,Engraulis mordax,,", ",M. Lance
Pv16.375,Clupea pallasi,,", ",M. Lance
Pv16.375,Clupea pallasi,,", ",M. Lance
Pv16.375,Clupea pallasi,,", ",M. Lance
Pv16.376,Porichthys notatus,,", ",M. Lance
Pv16.376,Porichthys notatus,,", ",M. Lance
Pv16.376,Engraulis mordax,,", ",M. Lance
Pv16.378,Alosa sapidissima,,", ",M. Lance
Pv16.378,Gadid or Merluccid,,", ",M. Lance
Pv16.378,Hemilepidotus spp.,,", ",M. Lance
Pv16.378,Doryteuthis opalescens,,", ",M. Lance
Pv16.378,Doryteuthis opalescens,,", ",M. Lance
Pv16.378,Octopus rubescens,,", ",M. Lance
Pv16.380,Cymatogaster aggregata,,", ",M. Lance
Pv16.380,Cymatogaster aggregata,,", ",M. Lance
Pv16.380,Theragra chalcogramma,,", ",M. Lance
Pv16.380,Theragra chalcogramma,,", ",M. Lance
Pv16.380,Merluccius productus,,", ",M. Lance
Pv16.380,Merluccius productus,,", ",M. Lance
Pv16.380,Doryteuthis opalescens,,", ",M. Lance
Pv16.381,Oncorhynchus tshawytscha,Juvenile,"juvenile, chinook vertebrae present, no other remains. Age classification based on vertebral size.",M. Lance
Pv16.382,Porichthys notatus,,", ",M. Lance
Pv16.382,Porichthys notatus,,", ",M. Lance
Pv16.382,Porichthys notatus,,", ",M. Lance
Pv16.383,Leptocottus armatus,,", ",M. Lance
Pv16.383,Leptocottus armatus,,", ",M. Lance
Pv16.383,Leptocottus armatus,,", ",M. Lance
Pv16.383,Zoarcid spp.,,", ",M. Lance
Pv16.383,Zoarcid spp.,,", ",M. Lance
Pv16.383,Porichthys notatus,,", ",M. Lance
Pv16.383,Porichthys notatus,,", ",M. Lance
Pv16.383,Rajid spp.,,", ",M. Lance
Pv16.383,Doryteuthis opalescens,,", ",M. Lance
Pv16.383,Doryteuthis opalescens,,", ",M. Lance
Pv16.384,Hemilepidotus spp.,,", ",M. Lance
Pv16.384,Hemilepidotus spp.,,", ",M. Lance
Pv16.384,Hemilepidotus spp.,,", ",M. Lance
Pv16.384,Merluccius productus,,", ",M. Lance
Pv16.384,Merluccius productus,,", ",M. Lance
Pv16.384,Octopus rubescens,,", ",M. Lance
Pv16.384,Octopus rubescens,,", ",M. Lance
Pv16.385,Oncorhynchus tshawytscha,Juvenile,"juvenile, chinook vertebrae present, no other remains. Age classification based on vertebral size range.",M. Lance
Pv16.386,Engraulis mordax,,", ",M. Lance
Pv16.386,Porichthys notatus,,", ",M. Lance
Pv16.386,Alosa sapidissima,,", ",M. Lance
Pv16.386,Merluccius productus,,", ",M. Lance
Pv16.386,Pleuronectid spp.,,", ",M. Lance
Pv16.386,Pleuronectid spp.,,", ",M. Lance
Pv16.387,Gadid or Merluccid,,", ",M. Lance
Pv16.388,Cottid spp.,,", ",M. Lance
Pv16.389,Cottid spp.,,", ",M. Lance
Pv16.389,Pholid spp.,,", ",M. Lance
Pv16.390,Engraulis mordax,,", ",M. Lance
Pv16.390,Engraulis mordax,,", ",M. Lance
Pv16.390,Engraulis mordax,,", ",M. Lance
Pv16.391,Oncorhynchus tshawytscha,Juvenile,"juvenile, otolith id confirmed by chinook vertebrae. No other remains",M. Lance
Pv16.392,Engraulis mordax,,", ",M. Lance
Pv16.393,Engraulis mordax,,", ",M. Lance
Pv16.393,Engraulis mordax,,", ",M. Lance
Pv16.393,Clupea pallasi,,", ",M. Lance
Pv16.393,Clupea pallasi,,", ",M. Lance
Pv16.393,Clupea pallasi,,", ",M. Lance
Pv16.393,Cottid spp.,,", ",M. Lance
Pv16.394,Engraulis mordax,,", ",M. Lance
Pv16.394,Engraulis mordax,,", ",M. Lance
Pv16.394,Engraulis mordax,,", ",M. Lance
Pv16.395,Engraulis mordax,,", ",M. Lance
Pv16.395,Engraulis mordax,,", ",M. Lance
Pv16.395,Engraulis mordax,,", ",M. Lance
Pv16.396,Engraulis mordax,,", ",M. Lance
Pv16.396,Engraulis mordax,,", ",M. Lance
Pv16.397,Engraulis mordax,,", ",M. Lance
Pv16.397,Engraulis mordax,,", ",M. Lance
Pv16.397,Engraulis mordax,,", ",M. Lance
Pv16.397,Clupea pallasi,,", ",M. Lance
Pv16.397,Clupea pallasi,,", ",M. Lance
Pv16.397,Clupea pallasi,,", ",M. Lance
Pv16.398,Engraulis mordax,,", ",M. Lance
Pv16.398,Engraulis mordax,,", ",M. Lance
Pv16.398,Engraulis mordax,,", ",M. Lance
Pv16.399,Engraulis mordax,,", ",M. Lance
Pv16.399,Engraulis mordax,,", ",M. Lance
Pv16.399,Engraulis mordax,,", ",M. Lance
Pv16.401,Engraulis mordax,,", ",M. Lance
Pv16.402,Engraulis mordax,,", ",M. Lance
Pv16.402,Engraulis mordax,,", ",M. Lance
Pv16.402,Engraulis mordax,,", ",M. Lance
Pv16.402,Pleuronectid spp.,,", ",M. Lance
Pv16.402,Stichaeid spp.,,", ",M. Lance
Pv16.403,Cymatogaster aggregata,,", ",M. Lance
Pv16.403,Cymatogaster aggregata,,", ",M. Lance
Pv16.403,Cymatogaster aggregata,,", ",M. Lance
Pv16.403,Engraulis mordax,,", ",M. Lance
Pv16.403,Engraulis mordax,,", ",M. Lance
Pv16.403,Engraulis mordax,,", ",M. Lance
Pv16.404,Engraulis mordax,,", ",M. Lance
Pv16.404,Engraulis mordax,,", ",M. Lance
Pv16.404,Engraulis mordax,,", ",M. Lance
Pv16.404,Cymatogaster aggregata,,", ",M. Lance
Pv16.405,Engraulis mordax,,", ",M. Lance
Pv16.405,Engraulis mordax,,", ",M. Lance
Pv16.405,Engraulis mordax,,", ",M. Lance
Pv16.406,Merluccius productus,,", ",M. Lance
Pv16.406,Merluccius productus,,", ",M. Lance
Pv16.406,Porichthys notatus,,", ",M. Lance
Pv16.406,Porichthys notatus,,", ",M. Lance
Pv16.406,Leptocottus armatus,,", ",M. Lance
Pv16.406,Leptocottus armatus,,", ",M. Lance
Pv16.406,Pleuronectid spp.,,", ",M. Lance
Pv16.406,Pleuronectid spp.,,", ",M. Lance
Pv16.406,Pleuronectid spp.,,", ",M. Lance
Pv16.406,Pleuronectes vetulus,,", ",M. Lance
Pv16.406,Pleuronectes vetulus,,", ",M. Lance
Pv16.406,Pleuronectes vetulus,,", ",M. Lance
Pv16.406,Engraulis mordax,,", ",M. Lance
Pv16.406,Engraulis mordax,,", ",M. Lance
Pv16.406,Engraulis mordax,,", ",M. Lance
Pv16.406,Clupea pallasi,,", ",M. Lance
Pv16.406,Clupea pallasi,,", ",M. Lance
Pv16.406,Clupea pallasi,,", ",M. Lance
Pv16.407,Engraulis mordax,,", ",M. Lance
Pv16.407,Engraulis mordax,,", ",M. Lance
Pv16.407,Clupea pallasi,,", ",M. Lance
Pv16.407,Cottid spp.,,", ",M. Lance
Pv16.408,Engraulis mordax,,", ",M. Lance
Pv16.408,Engraulis mordax,,", ",M. Lance
Pv16.408,Engraulis mordax,,", ",M. Lance
Pv16.409,Engraulis mordax,,", ",M. Lance
Pv16.409,Engraulis mordax,,", ",M. Lance
Pv16.409,Engraulis mordax,,", ",M. Lance
Pv16.409,Alosa sapidissima,,", ",M. Lance
Pv16.410,Engraulis mordax,,", ",M. Lance
Pv16.410,Engraulis mordax,,", ",M. Lance
Pv16.410,Engraulis mordax,,", ",M. Lance
Pv16.410,Clupea pallasi,,", ",M. Lance
Pv16.410,Clupea pallasi,,", ",M. Lance
Pv16.410,Clupea pallasi,,", ",M. Lance
Pv16.411,Engraulis mordax,,", ",M. Lance
Pv16.411,Engraulis mordax,,", ",M. Lance
Pv16.411,Engraulis mordax,,", ",M. Lance
Pv16.412,Engraulis mordax,,", ",M. Lance
Pv16.412,Engraulis mordax,,", ",M. Lance
Pv16.412,Engraulis mordax,,", ",M. Lance
Pv16.413,Engraulis mordax,,", ",M. Lance
Pv16.413,Pleuronectid spp.,,", ",M. Lance
Pv16.413,Clupea pallasi,,", ",M. Lance
Pv16.414,Merluccius productus,,", ",M. Lance
Pv16.414,Merluccius productus,,", ",M. Lance
Pv16.414,Engraulis mordax,,", ",M. Lance
Pv16.415,Porichthys notatus,,", ",M. Lance
Pv16.415,Porichthys notatus,,", ",M. Lance
Pv16.415,Lampetra ayresii,,", ",M. Lance
Pv16.415,Clupea pallasi,,", ",M. Lance
Pv16.415,Clupea pallasi,,", ",M. Lance
Pv16.415,Alosa sapidissima,,", ",M. Lance
Pv16.416,Porichthys notatus,,", ",M. Lance
Pv16.416,Porichthys notatus,,", ",M. Lance
Pv16.416,Porichthys notatus,,", ",M. Lance
Pv16.416,Alosa sapidissima,,", ",M. Lance
Pv16.416,Merluccius productus,,", ",M. Lance
Pv16.416,Cymatogaster aggregata,,", ",M. Lance
Pv16.417,Oncorhynchus sp.  ,Juvenile,"juvenile, Quadrate bone only. Quadrate similar in size to that of ~ 120 mm chinook",M. Lance
Pv16.418,Zoarcid spp.,,", ",M. Lance
Pv16.418,Porichthys notatus,,", ",M. Lance
Pv16.418,Porichthys notatus,,", ",M. Lance
Pv16.418,Porichthys notatus,,", ",M. Lance
Pv16.418,Pleuronectid spp.,,", ",M. Lance
Pv16.418,Pleuronectid spp.,,", ",M. Lance
Pv16.418,Pleuronectid spp.,,", ",M. Lance
Pv16.418,Pleuronectes vetulus,,", ",M. Lance
Pv16.418,Pleuronectes vetulus,,", ",M. Lance
Pv16.418,Rajid spp.,,", ",M. Lance
Pv16.419,Porichthys notatus,,", ",M. Lance
Pv16.419,Porichthys notatus,,", ",M. Lance
Pv16.419,Clupeid spp.,,", ",M. Lance
Pv16.419,Pleuronectid spp.,,", ",M. Lance
Pv16.419,Octopus rubescens,,", ",M. Lance
Pv16.419,Octopus rubescens,,", ",M. Lance
Pv16.420,Porichthys notatus,,", ",M. Lance
Pv16.420,Porichthys notatus,,", ",M. Lance
Pv16.420,Engraulis mordax,,", ",M. Lance
Pv16.420,Engraulis mordax,,", ",M. Lance
Pv16.420,Engraulis mordax,,", ",M. Lance
Pv16.421,Porichthys notatus,,", ",M. Lance
Pv16.421,Porichthys notatus,,", ",M. Lance
Pv16.421,Porichthys notatus,,", ",M. Lance
Pv16.421,Cymatogaster aggregata,,", ",M. Lance
Pv16.421,Cymatogaster aggregata,,", ",M. Lance
Pv16.422,Platichthys stellatus,,", ",M. Lance
Pv16.422,Porichthys notatus,,", ",M. Lance
Pv16.422,Clupeid spp.,,", ",M. Lance
Pv16.422,Gadid or Merluccid,,", ",M. Lance
Pv16.423,Alosa sapidissima,,", ",M. Lance
Pv16.423,Clupea pallasi,,", ",M. Lance
Pv16.423,Clupea pallasi,,", ",M. Lance
Pv16.423,Porichthys notatus,,", ",M. Lance
Pv16.423,Porichthys notatus,,", ",M. Lance
Pv16.423,Porichthys notatus,,", ",M. Lance
Pv16.423,Lampetra ayresii,,", ",M. Lance
Pv16.425,Porichthys notatus,,", ",M. Lance
Pv16.425,Porichthys notatus,,", ",M. Lance
Pv16.425,Porichthys notatus,,", ",M. Lance
Pv16.426,Porichthys notatus,,", ",M. Lance
Pv16.426,Porichthys notatus,,", ",M. Lance
Pv16.426,Porichthys notatus,,", ",M. Lance
Pv16.426,Microgadus proximus,,", ",M. Lance
Pv16.426,Microgadus proximus,,", ",M. Lance
Pv16.426,Microgadus proximus,,", ",M. Lance
Pv16.426,Pleuronectid spp.,,", ",M. Lance
Pv16.426,Pleuronectid spp.,,", ",M. Lance
Pv16.426,Pleuronectid spp.,,", ",M. Lance
Pv16.426,Octopus rubescens,,", ",M. Lance
Pv16.426,Octopus rubescens,,", ",M. Lance
Pv16.427,Porichthys notatus,,", ",M. Lance
Pv16.427,Porichthys notatus,,", ",M. Lance
Pv16.427,Porichthys notatus,,", ",M. Lance
Pv16.427,Engraulis mordax,,", ",M. Lance
Pv16.427,Engraulis mordax,,", ",M. Lance
Pv16.427,Engraulis mordax,,", ",M. Lance
Pv16.428,Porichthys notatus,,", ",M. Lance
Pv16.428,Porichthys notatus,,", ",M. Lance
Pv16.428,Porichthys notatus,,", ",M. Lance
Pv16.428,Cymatogaster aggregata,,", ",M. Lance
Pv16.428,Cymatogaster aggregata,,", ",M. Lance
Pv16.428,Cymatogaster aggregata,,", ",M. Lance
Pv16.428,Leptocottus armatus,,", ",M. Lance
Pv16.428,Leptocottus armatus,,", ",M. Lance
Pv16.428,Leptocottus armatus,,", ",M. Lance
Pv16.428,Microgadus proximus,,", ",M. Lance
Pv16.428,Microgadus proximus,,", ",M. Lance
Pv16.428,Pleuronectid spp.,,", ",M. Lance
Pv16.428,Pleuronectid spp.,,", ",M. Lance
Pv16.428,Clupea pallasi,,", ",M. Lance
Pv16.428,Clupea pallasi,,", ",M. Lance
Pv16.429,Merluccius productus,,", ",M. Lance
Pv16.430,Cymatogaster aggregata,,", ",M. Lance
Pv16.430,Cymatogaster aggregata,,", ",M. Lance
Pv16.430,Cymatogaster aggregata,,", ",M. Lance
Pv16.431,Merluccius productus,,", ",M. Lance
Pv16.431,Clupea pallasi,,", ",M. Lance
Pv16.432,Merluccius productus,,", ",M. Lance
Pv16.432,Merluccius productus,,", ",M. Lance
Pv16.432,Merluccius productus,,", ",M. Lance
Pv16.432,Theragra chalcogramma,,", ",M. Lance
Pv16.432,Theragra chalcogramma,,", ",M. Lance
Pv16.432,Theragra chalcogramma,,", ",M. Lance
Pv16.432,Cymatogaster aggregata,,", ",M. Lance
Pv16.432,Cymatogaster aggregata,,", ",M. Lance
Pv16.433,Alosa sapidissima,,", ",M. Lance
Pv16.434,Porichthys notatus,,", ",M. Lance
Pv16.434,Porichthys notatus,,", ",M. Lance
Pv16.434,Merluccius productus,,", ",M. Lance
Pv16.434,Merluccius productus,,", ",M. Lance
Pv16.434,Merluccius productus,,", ",M. Lance
Pv16.434,Clupea pallasi,,", ",M. Lance
Pv16.434,Octopus rubescens,,", ",M. Lance
Pv16.436,Clupeid spp.,,", ",M. Lance
Pv16.436,Porichthys notatus,,", ",M. Lance
Pv16.437,Merluccius productus,,", ",M. Lance
Pv16.437,Merluccius productus,,", ",M. Lance
Pv16.437,Merluccius productus,,", ",M. Lance
Pv16.437,Engraulis mordax,,", ",M. Lance
Pv16.437,Clupeid spp.,,", ",M. Lance
Pv16.438,Clupea pallasi,,", ",M. Lance
Pv16.438,Rajid spp.,,", ",M. Lance
Pv16.438,Gadid or Merluccid,,", ",M. Lance
Pv16.439,Merluccius productus,,", ",M. Lance
Pv16.439,Merluccius productus,,", ",M. Lance
Pv16.439,Merluccius productus,,", ",M. Lance
Pv16.439,Alosa sapidissima,,", ",M. Lance
Pv16.440,Cymatogaster aggregata,,", ",M. Lance
Pv16.440,Cymatogaster aggregata,,", ",M. Lance
Pv16.440,Cymatogaster aggregata,,", ",M. Lance
Pv16.440,Lampetra ayresii,,", ",M. Lance
Pv16.440,Porichthys notatus,,", ",M. Lance
Pv16.440,Porichthys notatus,,", ",M. Lance
Pv16.440,Merluccius productus,,", ",M. Lance
Pv16.440,Merluccius productus,,", ",M. Lance
Pv16.440,Merluccius productus,,", ",M. Lance
Pv16.440,Theragra chalcogramma,,", ",M. Lance
Pv16.441,Clupea pallasi,,", ",M. Lance
Pv16.441,Cymatogaster aggregata,,", ",M. Lance
Pv16.441,Cymatogaster aggregata,,", ",M. Lance
Pv16.441,Theragra chalcogramma,,", ",M. Lance
Pv16.443,Porichthys notatus,,", ",M. Lance
Pv16.443,Porichthys notatus,,", ",M. Lance
Pv16.443,Porichthys notatus,,", ",M. Lance
Pv16.443,Porichthys notatus,,", ",M. Lance
Pv16.443,Microgadus proximus,,", ",M. Lance
Pv16.443,Microgadus proximus,,", ",M. Lance
Pv16.443,Microgadus proximus,,", ",M. Lance
Pv16.443,Engraulis mordax,,", ",M. Lance
Pv16.443,Leptocottus armatus,,", ",M. Lance
Pv16.444,Ammodytes hexapteras,,", ",M. Lance
Pv16.444,Clupea pallasi,,", ",M. Lance
Pv16.444,Theragra chalcogramma,,", ",M. Lance
Pv16.444,Porichthys notatus,,", ",M. Lance
Pv16.444,Porichthys notatus,,", ",M. Lance
Pv16.445,Oncorhynchus sp.,Juvenile,"juvenile, ",M. Lance
Pv16.446,Porichthys notatus,,", ",M. Lance
Pv16.446,Cottid spp.,,", ",M. Lance
Pv16.446,Merluccius productus,,", ",M. Lance
Pv16.446,Alosa sapidissima,,", ",M. Lance
Pv16.446,Clupea pallasi,,", ",M. Lance
Pv16.447,Merluccius productus,,", ",M. Lance
Pv16.447,Merluccius productus,,", ",M. Lance
Pv16.447,Merluccius productus,,", ",M. Lance
Pv16.447,Theragra chalcogramma,,", ",M. Lance
Pv16.447,Theragra chalcogramma,,", ",M. Lance
Pv16.448,Leptocottus armatus,,", ",M. Lance
Pv16.448,Leptocottus armatus,,", ",M. Lance
Pv16.448,Theragra chalcogramma,,", ",M. Lance
Pv16.448,Theragra chalcogramma,,", ",M. Lance
Pv16.448,Clupea pallasi,,", ",M. Lance
Pv16.448,Ammodytes hexapteras,,", ",M. Lance
Pv16.448,Ammodytes hexapteras,,", ",M. Lance
Pv16.450,Gadid or Merluccid,,", ",M. Lance
Pv16.451,Merluccius productus,,", ",M. Lance
Pv16.451,Merluccius productus,,", ",M. Lance
Pv16.451,Merluccius productus,,", ",M. Lance
Pv16.451,Cymatogaster aggregata,,", ",M. Lance
Pv16.451,Alosa sapidissima,,", ",M. Lance
Pv16.452,Gadid or Merluccid,,", ",M. Lance
Pv16.452,Porichthys notatus,,", ",M. Lance
Pv16.452,Porichthys notatus,,", ",M. Lance
Pv16.452,Platichthys stellatus,,", ",M. Lance
Pv16.452,Platichthys stellatus,,", ",M. Lance
Pv16.452,Pleuronectid spp.,,", ",M. Lance
Pv16.452,Pleuronectid spp.,,", ",M. Lance
Pv16.453,Cymatogaster aggregata,,", ",M. Lance
Pv16.453,Cymatogaster aggregata,,", ",M. Lance
Pv16.453,Cymatogaster aggregata,,", ",M. Lance
Pv16.453,Lampetra ayresii,,", ",M. Lance
Pv16.453,Gadid or Merluccid,,", ",M. Lance
Pv16.453,Gadid or Merluccid,,", ",M. Lance
Pv16.453,Alosa sapidissima,,", ",M. Lance
Pv16.454,Merluccius productus,,", ",M. Lance
Pv16.454,Merluccius productus,,", ",M. Lance
Pv16.454,Merluccius productus,,", ",M. Lance
Pv16.454,Alosa sapidissima,,", ",M. Lance
Pv16.456,Merluccius productus,,", ",M. Lance
Pv16.457,Clupea pallasi,,", ",M. Lance
Pv16.458,Oncorhynchus sp.,Juvenile,"juvenile, ",M. Lance
Pv16.459,Theragra chalcogramma,,", ",M. Lance
Pv16.459,Theragra chalcogramma,,", ",M. Lance
Pv16.460,Merluccius productus,,", ",M. Lance
Pv16.460,Merluccius productus,,", ",M. Lance
Pv16.460,Clupea pallasi,,", ",M. Lance
Pv16.460,Porichthys notatus,,", ",M. Lance
Pv16.460,Alosa sapidissima,,", ",M. Lance
Pv16.461,Porichthys notatus,,", ",M. Lance
Pv16.461,Pholid spp.,,", ",M. Lance
Pv16.461,Gadid or Merluccid,,", ",M. Lance
Pv16.462,Oncorhynchus tshawytscha,Juvenile,"juvenile, ",M. Lance
Pv16.462,Oncorhynchus sp.,Juvenile,"juvenile, typical mykiss / clarkii type verts.",M. Lance
Pv16.463,Sebastes spp.,,", ",M. Lance
Pv16.463,Merluccius productus,,", ",M. Lance
Pv16.463,Merluccius productus,,", ",M. Lance
Pv16.463,Merluccius productus,,", ",M. Lance
Pv16.464,Cottid spp.,,", ",M. Lance
Pv16.464,Clupeid spp.,,", ",M. Lance
Pv16.465,Porichthys notatus,,", ",M. Lance
Pv16.465,Porichthys notatus,,", ",M. Lance
Pv16.465,Porichthys notatus,,", ",M. Lance
Pv16.467,Cymatogaster aggregata,,", ",M. Lance
Pv16.467,Cymatogaster aggregata,,", ",M. Lance
Pv16.467,Cymatogaster aggregata,,", ",M. Lance
Pv16.467,Hemilepidotus spp.,,", ",M. Lance
Pv16.467,Hemilepidotus spp.,,", ",M. Lance
Pv16.468,Cymatogaster aggregata,,", ",M. Lance
Pv16.468,Cymatogaster aggregata,,", ",M. Lance
Pv16.468,Cymatogaster aggregata,,", ",M. Lance
Pv16.468,Clupea pallasi,,", ",M. Lance
Pv16.468,Clupea pallasi,,", ",M. Lance
Pv16.468,Doryteuthis opalescens,,", ",M. Lance
Pv16.468,Doryteuthis opalescens,,", ",M. Lance
Pv16.469,Clupea pallasi,,", ",M. Lance
Pv16.470,Cymatogaster aggregata,,", ",M. Lance
Pv16.470,Cymatogaster aggregata,,", ",M. Lance
Pv16.470,Cymatogaster aggregata,,", ",M. Lance
Pv16.471,Cymatogaster aggregata,,", ",M. Lance
Pv16.471,Cymatogaster aggregata,,", ",M. Lance
Pv16.471,Cymatogaster aggregata,,", ",M. Lance
Pv16.471,Porichthys notatus,,", ",M. Lance
Pv16.471,Porichthys notatus,,", ",M. Lance
Pv16.471,Clupea pallasi,,", ",M. Lance
Pv16.471,Clupea pallasi,,", ",M. Lance
Pv16.471,Gadid or Merluccid,,", ",M. Lance
Pv16.471,Doryteuthis opalescens,,", ",M. Lance
Pv16.472,Cymatogaster aggregata,,", ",M. Lance
Pv16.472,Cymatogaster aggregata,,", ",M. Lance
Pv16.472,Cymatogaster aggregata,,", ",M. Lance
Pv16.472,Porichthys notatus,,", ",M. Lance
Pv16.472,Porichthys notatus,,", ",M. Lance
Pv16.472,Doryteuthis opalescens,,", ",M. Lance
Pv16.472,Doryteuthis opalescens,,", ",M. Lance
Pv16.473,Cymatogaster aggregata,,", ",M. Lance
Pv16.473,Cymatogaster aggregata,,", ",M. Lance
Pv16.473,Cymatogaster aggregata,,", ",M. Lance
Pv16.473,Porichthys notatus,,", ",M. Lance
Pv16.473,Porichthys notatus,,", ",M. Lance
Pv16.473,Porichthys notatus,,", ",M. Lance
Pv16.473,Pleuronectid spp.,,", ",M. Lance
Pv16.473,Pleuronectid spp.,,", ",M. Lance
Pv16.474,Cymatogaster aggregata,,", ",M. Lance
Pv16.474,Cymatogaster aggregata,,", ",M. Lance
Pv16.474,Cymatogaster aggregata,,", ",M. Lance
Pv16.475,Cymatogaster aggregata,,", ",M. Lance
Pv16.476,Porichthys notatus,,", ",M. Lance
Pv16.476,Porichthys notatus,,", ",M. Lance
Pv16.476,Porichthys notatus,,", ",M. Lance
Pv16.477,Porichthys notatus,,", ",M. Lance
Pv16.477,Porichthys notatus,,", ",M. Lance
Pv16.477,Porichthys notatus,,", ",M. Lance
Pv16.477,Cymatogaster aggregata,,", ",M. Lance
Pv16.477,Cymatogaster aggregata,,", ",M. Lance
Pv16.477,Cymatogaster aggregata,,", ",M. Lance
Pv16.477,Engraulis mordax,,", ",M. Lance
Pv16.477,Pleuronectes vetulus,,", ",M. Lance
Pv16.477,Pleuronectes vetulus,,", ",M. Lance
Pv16.477,Pleuronectes vetulus,,", ",M. Lance
Pv16.478,Porichthys notatus,,", ",M. Lance
Pv16.478,Porichthys notatus,,", ",M. Lance
Pv16.478,Porichthys notatus,,", ",M. Lance
Pv16.478,Damalichthys vacca,,", ",M. Lance
Pv16.478,Damalichthys vacca,,", ",M. Lance
Pv16.478,Damalichthys vacca,,", ",M. Lance
Pv16.478,Hemilepidotus spp.,,", ",M. Lance
Pv16.478,Hemilepidotus spp.,,", ",M. Lance
Pv16.478,Platichthys stellatus,,", ",M. Lance
Pv16.478,Platichthys stellatus,,", ",M. Lance
Pv16.478,Platichthys stellatus,,", ",M. Lance
Pv16.479,Cymatogaster aggregata,,", ",M. Lance
Pv16.479,Cymatogaster aggregata,,", ",M. Lance
Pv16.479,Cymatogaster aggregata,,", ",M. Lance
Pv16.479,Platichthys stellatus,,", ",M. Lance
Pv16.479,Platichthys stellatus,,", ",M. Lance
Pv16.479,Platichthys stellatus,,", ",M. Lance
Pv16.479,Pleuronectid spp.,,", ",M. Lance
Pv16.479,Pleuronectid spp.,,", ",M. Lance
Pv16.479,Pleuronectid spp.,,", larger than starry bones in sample",M. Lance
Pv16.479,Doryteuthis opalescens,,", ",M. Lance
Pv16.480,Platichthys stellatus,,", ",M. Lance
Pv16.480,Pleuronectes vetulus,,", ",M. Lance
Pv16.480,Rajid spp.,,", ",M. Lance
Pv16.480,Pholid spp.,,", ",M. Lance
Pv16.481,Clupea pallasi,,", ",M. Lance
Pv16.481,Clupea pallasi,,", ",M. Lance
Pv16.481,Clupea pallasi,,", ",M. Lance
Pv16.481,Porichthys notatus,,", ",M. Lance
Pv16.482,Clupea pallasi,,", ",M. Lance
Pv16.482,Clupea pallasi,,", ",M. Lance
Pv16.482,Clupea pallasi,,", ",M. Lance
Pv16.482,Cottid spp.,,", ",M. Lance
Pv16.482,Lampetra ayresii,,", ",M. Lance
Pv16.483,Merluccius productus,,", ",M. Lance
Pv16.483,Merluccius productus,,", ",M. Lance
Pv16.483,Merluccius productus,,", ",M. Lance
Pv16.483,Theragra chalcogramma,,", ",M. Lance
Pv16.483,Theragra chalcogramma,,", ",M. Lance
Pv16.483,Porichthys notatus,,", ",M. Lance
Pv16.484,Oncorhynchus tshawytscha,Adult,"sub-adult ?, also very large teeth and gillrakers",M. Lance
Pv16.485,Liparid spp.,,", ",M. Lance
Pv16.485,Liparid spp.,,", ",M. Lance
Pv16.485,Pleuronectid spp.,,", ",M. Lance
Pv16.485,Pleuronectid spp.,,", ",M. Lance
Pv16.485,Cottid spp.,,", ",M. Lance
Pv16.485,Cottid spp.,,", ",M. Lance
Pv16.485,Doryteuthis opalescens,,", ",M. Lance
Pv16.485,Doryteuthis opalescens,,", ",M. Lance
Pv16.486,Oncorhynchus tshawytscha,Juvenile,"juvenile, ",M. Lance
Pv16.487,Oncorhynchus sp.,Juvenile,"juvenile, also gilllrakers and teeth",M. Lance
Pv16.488,Porichthys notatus,,", ",M. Lance
Pv16.488,Porichthys notatus,,", ",M. Lance
Pv16.488,Porichthys notatus,,", ",M. Lance
Pv16.488,Leptocottus armatus,,", ",M. Lance
Pv16.488,Leptocottus armatus,,", ",M. Lance
Pv16.488,Leptocottus armatus,,", ",M. Lance
Pv16.488,Theragra chalcogramma,,", ",M. Lance
Pv16.488,Theragra chalcogramma,,", ",M. Lance
Pv16.488,Theragra chalcogramma,,", ",M. Lance
Pv16.488,Cymatogaster aggregata,,", ",M. Lance
Pv16.488,Cymatogaster aggregata,,", ",M. Lance
Pv16.488,Pleuronectid spp.,,", ",M. Lance
Pv16.488,Pleuronectid spp.,,", ",M. Lance
Pv16.488,Doryteuthis opalescens,,", ",M. Lance
Pv16.488,Doryteuthis opalescens,,", ",M. Lance
Pv16.489,Unidentifiable fish spp.,,", ",M. Lance
Pv16.489,Doryteuthis opalescens,,", ",M. Lance
Pv16.491,Porichthys notatus,,", ",M. Lance
Pv16.491,Porichthys notatus,,", ",M. Lance
Pv16.491,Porichthys notatus,,", ",M. Lance
Pv16.491,Leptocottus armatus,,", ",M. Lance
Pv16.491,Leptocottus armatus,,", ",M. Lance
Pv16.491,Leptocottus armatus,,", ",M. Lance
Pv16.491,Cymatogaster aggregata,,", ",M. Lance
Pv16.491,Cymatogaster aggregata,,", ",M. Lance
Pv16.491,Cymatogaster aggregata,,", ",M. Lance
Pv16.491,Theragra chalcogramma,,", ",M. Lance
Pv16.491,Theragra chalcogramma,,", ",M. Lance
Pv16.491,Theragra chalcogramma,,", ",M. Lance
Pv16.491,Theragra chalcogramma,,", ",M. Lance
Pv16.491,Rajid spp.,,", ",M. Lance
Pv16.491,Liparid spp.,,", ",M. Lance
Pv16.491,Liparid spp.,,", ",M. Lance
Pv16.491,Liparid spp.,,", ",M. Lance
Pv16.491,Pleuronectid spp.,,", ",M. Lance
Pv16.491,Zoarcid spp.,,", ",M. Lance
Pv16.491,Zoarcid spp.,,", ",M. Lance
Pv16.491,Doryteuthis opalescens,,", ",M. Lance
Pv16.491,Doryteuthis opalescens,,", ",M. Lance
Pv16.492,Leptocottus armatus,,", ",M. Lance
Pv16.492,Engraulis mordax,,", ",M. Lance
Pv16.492,Doryteuthis opalescens,,", ",M. Lance
Pv16.492,Doryteuthis opalescens,,", ",M. Lance
Pv16.493,Hemilepidotus spp.,,", ",M. Lance
Pv16.493,Hemilepidotus spp.,,", ",M. Lance
Pv16.493,Hemilepidotus spp.,,", ",M. Lance
Pv16.493,Doryteuthis opalescens,,", ",M. Lance
Pv16.493,Doryteuthis opalescens,,", ",M. Lance
Pv16.494,Hemilepidotus spp.,,", ",M. Lance
Pv16.494,Hemilepidotus spp.,,", ",M. Lance
Pv16.494,Hemilepidotus spp.,,", ",M. Lance
Pv16.494,Pleuronectid spp.,,", ",M. Lance
Pv16.494,Porichthys notatus,,", ",M. Lance
Pv16.494,Sebastes spp.,,", J",M. Lance
Pv16.494,Doryteuthis opalescens,,", ",M. Lance
Pv16.494,Doryteuthis opalescens,,", ",M. Lance
Pv16.495,Pleuronectid spp.,,", ",M. Lance
Pv16.495,Pleuronectid spp.,,", ",M. Lance
Pv16.495,Pleuronectid spp.,,", ",M. Lance
Pv16.495,Doryteuthis opalescens,,", ",M. Lance
Pv16.496,Hypomesus pretiosus,,", ",M. Lance
Pv16.496,Hypomesus pretiosus,,", ",M. Lance
Pv16.496,Hypomesus pretiosus,,", ",M. Lance
Pv16.496,Cottid spp.,,", ",M. Lance
Pv16.497,Porichthys notatus,,", ",M. Lance
Pv16.497,Porichthys notatus,,", ",M. Lance
Pv16.497,Hypomesus pretiosus,,", ",M. Lance
Pv16.497,Hypomesus pretiosus,,", ",M. Lance
Pv16.497,Hypomesus pretiosus,,", ",M. Lance
Pv16.497,Doryteuthis opalescens,,", ",M. Lance
Pv16.497,Doryteuthis opalescens,,", ",M. Lance
Pv16.498,Pleuronectid spp.,,", ",M. Lance
Pv16.498,Pleuronectid spp.,,", ",M. Lance
Pv16.498,Porichthys notatus,,", ",M. Lance
Pv16.498,Porichthys notatus,,", ",M. Lance
Pv16.498,Porichthys notatus,,", ",M. Lance
Pv16.498,Leptocottus armatus,,", ",M. Lance
Pv16.498,Leptocottus armatus,,", ",M. Lance
Pv16.498,Leptocottus armatus,,", ",M. Lance
Pv16.498,Cymatogaster aggregata,,", ",M. Lance
Pv16.498,Cymatogaster aggregata,,", ",M. Lance
Pv16.498,Cymatogaster aggregata,,", ",M. Lance
Pv16.498,Clupea pallasi,,", ",M. Lance
Pv16.498,Clupea pallasi,,", ",M. Lance
Pv16.498,Clupea pallasi,,", ",M. Lance
Pv16.498,Zoarcid spp.,,", ",M. Lance
Pv16.498,Zoarcid spp.,,", ",M. Lance
Pv16.498,Pholid spp.,,", ",M. Lance
Pv16.498,Pholid spp.,,", ",M. Lance
Pv16.498,Pleuronectid spp.,,", ",M. Lance
Pv16.499,Porichthys notatus,,", ",M. Lance
Pv16.499,Clupea pallasi,,", ",M. Lance
Pv16.499,Clupea pallasi,,", ",M. Lance
Pv16.500,Porichthys notatus,,", ",M. Lance
Pv16.500,Porichthys notatus,,", ",M. Lance
Pv16.500,Porichthys notatus,,", ",M. Lance
Pv16.501,Engraulis mordax,,", ",M. Lance
Pv16.501,Clupeid spp.,,", ",M. Lance
Pv16.501,Leptocottus armatus,,", ",M. Lance
Pv16.501,Leptocottus armatus,,", ",M. Lance
Pv16.501,Leptocottus armatus,,", ",M. Lance
Pv16.501,Cymatogaster aggregata,,", ",M. Lance
Pv16.501,Cymatogaster aggregata,,", ",M. Lance
Pv16.501,Doryteuthis opalescens,,", ",M. Lance
Pv16.501,Doryteuthis opalescens,,", ",M. Lance
Pv16.502,Hemilepidotus spp.,,", ",M. Lance
Pv16.502,Hemilepidotus spp.,,", ",M. Lance
Pv16.502,Cymatogaster aggregata,,", ",M. Lance
Pv16.503,Leptocottus armatus,,", ",M. Lance
Pv16.503,Doryteuthis opalescens,,", ",M. Lance
Pv16.504,Porichthys notatus,,", ",M. Lance
Pv16.504,Porichthys notatus,,", ",M. Lance
Pv16.504,Porichthys notatus,,", ",M. Lance
Pv16.504,Doryteuthis opalescens,,", ",M. Lance
Pv16.504,Doryteuthis opalescens,,", ",M. Lance
Pv16.506,Cottid spp.,,", ",M. Lance
Pv16.506,Doryteuthis opalescens,,", ",M. Lance
Pv16.506,Doryteuthis opalescens,,", ",M. Lance
Pv16.508,Leptocottus armatus,,", ",M. Lance
Pv16.508,Leptocottus armatus,,", ",M. Lance
Pv16.508,Leptocottus armatus,,", ",M. Lance
Pv16.508,Cymatogaster aggregata,,", ",M. Lance
Pv16.508,Doryteuthis opalescens,,", ",M. Lance
Pv16.508,Doryteuthis opalescens,,", ",M. Lance
Pv16.510,Cymatogaster aggregata,,", ",M. Lance
Pv16.510,Cymatogaster aggregata,,", ",M. Lance
Pv16.510,Cymatogaster aggregata,,", ",M. Lance
Pv16.510,Porichthys notatus,,", ",M. Lance
Pv16.510,Porichthys notatus,,", ",M. Lance
Pv16.510,Porichthys notatus,,", ",M. Lance
Pv16.510,Gadid or Merluccid,,", tomcod or pollock",M. Lance
Pv16.510,Gadid or Merluccid,,", ",M. Lance
Pv16.511,Cottid spp.,,", ",M. Lance
Pv16.511,Stichaeid spp.,,", ",M. Lance
Pv16.511,Porichthys notatus,,", ",M. Lance
Pv16.512,Merluccius productus,,", ",M. Lance
Pv16.512,Merluccius productus,,", ",M. Lance
Pv16.512,Merluccius productus,,", ",M. Lance
Pv16.512,Theragra chalcogramma,,", ",M. Lance
Pv16.512,Theragra chalcogramma,,", ",M. Lance
Pv16.512,Theragra chalcogramma,,", ",M. Lance
Pv16.512,Porichthys notatus,,", ",M. Lance
Pv16.512,Porichthys notatus,,", ",M. Lance
Pv16.512,Cymatogaster aggregata,,", ",M. Lance
Pv16.512,Cymatogaster aggregata,,", ",M. Lance
Pv16.512,Cymatogaster aggregata,,", ",M. Lance
Pv16.513,Pleuronectes vetulus,,", ",M. Lance
Pv16.513,Pleuronectes vetulus,,", ",M. Lance
Pv16.513,Pleuronectes vetulus,,", ",M. Lance
Pv16.514,Unidentifiable fish spp.,,", ",M. Lance
Pv16.515,Porichthys notatus,,", ",M. Lance
Pv16.515,Porichthys notatus,,", ",M. Lance
Pv16.515,Porichthys notatus,,", ",M. Lance
Pv16.517,Porichthys notatus,,", ",M. Lance
Pv16.517,Porichthys notatus,,", ",M. Lance
Pv16.517,Porichthys notatus,,", ",M. Lance
Pv16.517,Cymatogaster aggregata,,", ",M. Lance
Pv16.517,Cymatogaster aggregata,,", ",M. Lance
Pv16.517,Cymatogaster aggregata,,", ",M. Lance
Pv16.518,Cymatogaster aggregata,,", ",M. Lance
Pv16.518,Cymatogaster aggregata,,", ",M. Lance
Pv16.518,Cymatogaster aggregata,,", ",M. Lance
Pv16.519,Clupea pallasi,,", ",M. Lance
Pv16.520,Cymatogaster aggregata,,", ",M. Lance
Pv16.520,Cymatogaster aggregata,,", ",M. Lance
Pv16.520,Porichthys notatus,,", ",M. Lance
Pv16.520,Porichthys notatus,,", ",M. Lance
Pv16.520,Microgadus proximus,,", ",M. Lance
Pv16.520,Microgadus proximus,,", ",M. Lance
Pv16.520,Merluccius productus,,", ",M. Lance
Pv16.520,Doryteuthis opalescens,,", ",M. Lance
Pv16.520,Doryteuthis opalescens,,", ",M. Lance
Pv16.521,Cymatogaster aggregata,,", ",M. Lance
Pv16.521,Cymatogaster aggregata,,", ",M. Lance
Pv16.521,Cymatogaster aggregata,,", ",M. Lance
Pv16.521,Pholid spp.,,", ",M. Lance
Pv16.522,Porichthys notatus,,", ",M. Lance
Pv16.522,Porichthys notatus,,", ",M. Lance
Pv16.522,Clupeid spp.,,", ",M. Lance
Pv16.522,Cottid spp.,,", ",M. Lance
Pv16.522,Merluccius productus,,", ",M. Lance
Pv16.522,Osmerid spp.,,", ",M. Lance
Pv16.522,Pleuronectid spp.,,", ",M. Lance
Pv16.522,Pleuronectid spp.,,", ",M. Lance
Pv16.522,Pleuronectid spp.,,", ",M. Lance
Pv16.523,Clupea pallasi,,", ",M. Lance
Pv16.523,Clupea pallasi,,", ",M. Lance
Pv16.523,Clupea pallasi,,", ",M. Lance
Pv16.523,Cymatogaster aggregata,,", ",M. Lance
Pv16.523,Doryteuthis opalescens,,", ",M. Lance
Pv16.523,Doryteuthis opalescens,,", ",M. Lance
Pv16.524,Oncorhynchus tshawytscha,Juvenile,"juvenile, ",M. Lance
Pv16.524,Oncorhynchus sp.,Juvenile,"juvenile, ",M. Lance
Pv16.525,Pleuronectid spp.,,", ",M. Lance
Pv16.525,Pleuronectid spp.,,", ",M. Lance
Pv16.525,Pleuronectid spp.,,", ",M. Lance
Pv16.525,Porichthys notatus,,", ",M. Lance
Pv16.526,Merluccius productus,,", ",M. Lance
Pv16.526,Merluccius productus,,", ",M. Lance
Pv16.526,Merluccius productus,,", ",M. Lance
Pv16.527,Merluccius productus,,", ",M. Lance
Pv16.527,Merluccius productus,,", ",M. Lance
Pv16.527,Cottid spp.,,", ",M. Lance
Pv16.528,Merluccius productus,,", ",M. Lance
Pv16.529,Leptocottus armatus,,", ",M. Lance
Pv16.529,Leptocottus armatus,,", ",M. Lance
Pv16.529,Cymatogaster aggregata,,", ",M. Lance
Pv16.529,Cymatogaster aggregata,,", ",M. Lance
Pv16.529,Octopus rubescens,,", ",M. Lance
Pv16.530,Oncorhynchus sp.,Juvenile,"smolt, too damaged for species id.",M. Lance
Pv16.531,Leptocottus armatus,,", ",M. Lance
Pv16.531,Leptocottus armatus,,", ",M. Lance
Pv16.531,Pleuronectid spp.,,", ",M. Lance
Pv16.531,Porichthys notatus,,", ",M. Lance
Pv16.532,Merluccius productus,,", ",M. Lance
Pv16.532,Cymatogaster aggregata,,", ",M. Lance
Pv16.532,Cymatogaster aggregata,,", ",M. Lance
Pv16.533,Pleuronectid spp.,,", ",M. Lance
Pv16.534,Leptocottus armatus,,", ",M. Lance
Pv16.535,Oncorhynchus sp.,Juvenile,"smolt, ",M. Lance
Pv16.536,Merluccius productus,,", ",M. Lance
Pv16.537,Pleuronectid spp.,,", ",M. Lance
Pv16.538,Pleuronectid spp.,,", ",M. Lance
Pv16.539,Merluccius productus,,", ",M. Lance
Pv16.539,Merluccius productus,,", ",M. Lance
Pv16.539,Merluccius productus,,", ",M. Lance
Pv16.540,Merluccius productus,,", ",M. Lance
Pv16.541,Leptocottus armatus,,", ",M. Lance
Pv16.541,Leptocottus armatus,,", ",M. Lance
Pv16.541,Merluccius productus,,", ",M. Lance
Pv16.541,Merluccius productus,,", ",M. Lance
Pv16.542,Cottid spp.,,", ",M. Lance
Pv16.542,Merluccius productus,,", ",M. Lance
Pv16.543,Merluccius productus,,", ",M. Lance
Pv16.543,Clupeid spp.,,", ",M. Lance
Pv16.544,Oncorhynchus sp.,Juvenile,"juvenile, ",M. Lance
Pv16.545,Pleuronectes vetulus,,", ",M. Lance
Pv16.545,Pleuronectes vetulus,,", ",M. Lance
Pv16.545,Pleuronectes vetulus,,", ",M. Lance
Pv16.547,Oncorhynchus sp.,Juvenile,"juvenile, ",M. Lance
Pv16.548,Merluccius productus,,", ",M. Lance
Pv16.548,Clupeid spp.,,", ",M. Lance
Pv16.549,Oncorhynchus sp.,Juvenile,"juvenile, vertebra damaged",M. Lance
Pv16.550,Cymatogaster aggregata,,", ",M. Lance
Pv16.550,Cymatogaster aggregata,,", ",M. Lance
Pv16.550,Cymatogaster aggregata,,", ",M. Lance
Pv16.550,Stichaeid spp.,,", ",M. Lance
Pv16.550,Pholid spp.,,", ",M. Lance
Pv16.550,Pholid spp.,,", ",M. Lance
Pv16.550,Pholid spp.,,", ",M. Lance
Pv16.550,Ammodytes hexapteras,,", ",M. Lance
Pv16.550,Leptocottus armatus,,", ",M. Lance
Pv16.550,Leptocottus armatus,,", ",M. Lance
Pv16.551,Cymatogaster aggregata,,", ",M. Lance
Pv16.551,Cymatogaster aggregata,,", ",M. Lance
Pv16.551,Merluccius productus,,", ",M. Lance
Pv16.551,Merluccius productus,,", ",M. Lance
Pv16.551,Clupeid spp.,,", ",M. Lance
Pv16.552,Merluccius productus,,", ",M. Lance
Pv16.552,Merluccius productus,,", ",M. Lance
Pv16.552,Merluccius productus,,", ",M. Lance
Pv16.553,Merluccius productus,,", ",M. Lance
Pv16.553,Doryteuthis opalescens,,", ",M. Lance
Pv16.553,Doryteuthis opalescens,,", ",M. Lance
Pv16.554,Merluccius productus,,", ",M. Lance
Pv16.555,Merluccius productus,,", ",M. Lance
Pv16.555,Clupeid spp.,,", ",M. Lance
Pv16.556,Pleuronectid spp.,,", LG",M. Lance
Pv16.557,Cymatogaster aggregata,,", ",M. Lance
Pv16.557,Cymatogaster aggregata,,", ",M. Lance
Pv16.557,Cymatogaster aggregata,,", ",M. Lance
Pv16.557,Clupeid spp.,,", ",M. Lance
Pv16.557,Gadid or Merluccid,,", ",M. Lance
Pv16.557,Doryteuthis opalescens,,", ",M. Lance
Pv16.558,Cymatogaster aggregata,,", ",M. Lance
Pv16.558,Cymatogaster aggregata,,", ",M. Lance
Pv16.558,Cymatogaster aggregata,,", ",M. Lance
Pv16.558,Gadid or Merluccid,,", ",M. Lance
Pv16.559,Pleuronectid spp.,,", ",M. Lance
Pv16.559,Pleuronectid spp.,,", ",M. Lance
Pv16.559,Pleuronectid spp.,,", ",M. Lance
Pv16.559,Porichthys notatus,,", ",M. Lance
Pv16.559,Porichthys notatus,,", ",M. Lance
Pv16.559,Porichthys notatus,,", ",M. Lance
Pv16.559,Rajid spp.,,", ",M. Lance
Pv16.559,Lampetra ayresii,,", ",M. Lance
Pv16.559,Leptocottus armatus,,", ",M. Lance
Pv16.559,Cymatogaster aggregata,,", ",M. Lance
Pv16.559,Cymatogaster aggregata,,", ",M. Lance
Pv16.559,Octopus rubescens,,", ",M. Lance
Pv16.560,Porichthys notatus,,", ",M. Lance
Pv16.560,Porichthys notatus,,", ",M. Lance
Pv16.560,Porichthys notatus,,", ",M. Lance
Pv16.560,Cymatogaster aggregata,,", ",M. Lance
Pv16.560,Cymatogaster aggregata,,", ",M. Lance
Pv16.560,Hemilepidotus spp.,,", ",M. Lance
Pv16.560,Hemilepidotus spp.,,", ",M. Lance
Pv16.560,Hemilepidotus spp.,,", ",M. Lance
Pv16.561,Porichthys notatus,,", ",M. Lance
Pv16.561,Porichthys notatus,,", ",M. Lance
Pv16.562,Ammodytes hexapteras,,", ",M. Lance
Pv16.562,Ammodytes hexapteras,,", ",M. Lance
Pv16.562,Ammodytes hexapteras,,", ",M. Lance
Pv16.562,Leptocottus armatus,,", ",M. Lance
Pv16.562,Leptocottus armatus,,", ",M. Lance
Pv16.562,Unidentifiable fish spp.,,", ",M. Lance
Pv16.562,Cymatogaster aggregata,,", ",M. Lance
Pv16.563,Cymatogaster aggregata,,", ",M. Lance
Pv16.563,Cymatogaster aggregata,,", ",M. Lance
Pv16.563,Cymatogaster aggregata,,", ",M. Lance
Pv16.563,Porichthys notatus,,", ",M. Lance
Pv16.563,Leptocottus armatus,,", ",M. Lance
Pv16.563,Leptocottus armatus,,", ",M. Lance
Pv16.563,Engraulis mordax,,", ",M. Lance
Pv16.563,Rajid spp.,,", ",M. Lance
Pv16.563,Pleuronectid spp.,,", ",M. Lance
Pv16.563,Pleuronectid spp.,,", ",M. Lance
Pv16.563,Pleuronectid spp.,,", ",M. Lance
Pv16.565,Cottid spp.,,", ",M. Lance
Pv16.565,Pleuronectid spp.,,", ",M. Lance
Pv16.566,Pleuronectid spp.,,", ",M. Lance
Pv16.566,Pleuronectid spp.,,", ",M. Lance
Pv16.566,Pleuronectid spp.,,", ",M. Lance
Pv16.566,Porichthys notatus,,", ",M. Lance
Pv16.566,Leptocottus armatus,,", ",M. Lance
Pv16.566,Leptocottus armatus,,", ",M. Lance
Pv16.566,Pholid spp.,,", ",M. Lance
Pv16.567,Cymatogaster aggregata,,", ",M. Lance
Pv16.567,Cymatogaster aggregata,,", ",M. Lance
Pv16.567,Cymatogaster aggregata,,", ",M. Lance
Pv16.567,Doryteuthis opalescens,,", ",M. Lance
Pv16.567,Doryteuthis opalescens,,", ",M. Lance
Pv16.568,Oncorhynchus tshawytscha,Juvenile,"juvenile, estimate is probably reliable",M. Lance
Pv16.569,Porichthys notatus,,", ",M. Lance
Pv16.569,Pleuronectes vetulus,,", ",M. Lance
Pv16.569,Pleuronectes vetulus,,", ",M. Lance
Pv16.569,Pleuronectes vetulus,,", ",M. Lance
Pv16.569,Microgadus proximus,,", ",M. Lance
Pv16.569,Microgadus proximus,,", ",M. Lance
Pv16.569,Microgadus proximus,,", ",M. Lance
Pv16.569,Porichthys notatus,,", ",M. Lance
Pv16.569,Porichthys notatus,,", ",M. Lance
Pv16.570,Porichthys notatus,,", ",M. Lance
Pv16.570,Porichthys notatus,,", ",M. Lance
Pv16.570,Porichthys notatus,,", ",M. Lance
Pv16.570,Engraulis mordax,,", ",M. Lance
Pv16.570,Pleuronectid spp.,,", ",M. Lance
Pv16.570,Pleuronectid spp.,,", ",M. Lance
Pv16.570,Doryteuthis opalescens,,", ",M. Lance
Pv16.571,Porichthys notatus,,", ",M. Lance
Pv16.571,Porichthys notatus,,", ",M. Lance
Pv16.571,Porichthys notatus,,", ",M. Lance
Pv16.571,Leptocottus armatus,,", ",M. Lance
Pv16.571,Leptocottus armatus,,", ",M. Lance
Pv16.571,Leptocottus armatus,,", ",M. Lance
Pv16.571,Hemilepidotus spp.,,", ",M. Lance
Pv16.571,Hemilepidotus spp.,,", ",M. Lance
Pv16.571,Hemilepidotus spp.,,", ",M. Lance
Pv16.572,Cottid spp.,,", ",M. Lance
Pv16.572,Octopus rubescens,,", ",M. Lance
Pv16.574,Cymatogaster aggregata,,", ",M. Lance
Pv16.574,Cymatogaster aggregata,,", ",M. Lance
Pv16.574,Cymatogaster aggregata,,", ",M. Lance
Pv16.575,Rajid spp.,,", ",M. Lance
Pv16.575,Porichthys notatus,,", ",M. Lance
Pv16.575,Porichthys notatus,,", ",M. Lance
Pv16.576,Leptocottus armatus,,", ",M. Lance
Pv16.576,Leptocottus armatus,,", ",M. Lance
Pv16.576,Leptocottus armatus,,", ",M. Lance
Pv16.576,Cottid spp.,,", ",M. Lance
Pv16.576,Cottid spp.,,", ",M. Lance
Pv16.576,Cottid spp.,,", ",M. Lance
Pv16.576,Porichthys notatus,,", ",M. Lance
Pv16.576,Porichthys notatus,,", ",M. Lance
Pv16.576,Gadid or Merluccid,,", ",M. Lance
Pv16.576,Doryteuthis opalescens,,", ",M. Lance
Pv16.577,Porichthys notatus,,", ",M. Lance
Pv16.577,Porichthys notatus,,", ",M. Lance
Pv16.577,Porichthys notatus,,", ",M. Lance
Pv16.578,Theragra chalcogramma,,", ",M. Lance
Pv16.578,Theragra chalcogramma,,", ",M. Lance
Pv16.578,Theragra chalcogramma,,", ",M. Lance
Pv16.578,Merluccius productus,,", ",M. Lance
Pv16.578,Merluccius productus,,", ",M. Lance
Pv16.578,Merluccius productus,,", ",M. Lance
Pv16.578,Porichthys notatus,,", ",M. Lance
Pv16.578,Porichthys notatus,,", ",M. Lance
Pv16.578,Porichthys notatus,,", ",M. Lance
Pv16.578,Cymatogaster aggregata,,", ",M. Lance
Pv16.578,Cymatogaster aggregata,,", ",M. Lance
Pv16.578,Cymatogaster aggregata,,", ",M. Lance
Pv16.578,Doryteuthis opalescens,,", ",M. Lance
Pv16.578,Doryteuthis opalescens,,", ",M. Lance
Pv16.579,Oncorhynchus tshawytscha,Juvenile,"juvenile, ",M. Lance
Pv16.581,Porichthys notatus,,", ",M. Lance
Pv16.581,Porichthys notatus,,", ",M. Lance
Pv16.581,Lampetra ayresii,,", ",M. Lance
Pv16.581,Doryteuthis opalescens,,", ",M. Lance
Pv16.581,Doryteuthis opalescens,,", ",M. Lance
Pv16.582,Leptocottus armatus,,", ",M. Lance
Pv16.582,Leptocottus armatus,,", ",M. Lance
Pv16.582,Leptocottus armatus,,", ",M. Lance
Pv16.582,Cymatogaster aggregata,,", ",M. Lance
Pv16.582,Cymatogaster aggregata,,", ",M. Lance
Pv16.582,Zoarcid spp.,,", ",M. Lance
Pv16.582,Zoarcid spp.,,", ",M. Lance
Pv16.582,Pleuronectid spp.,,", ",M. Lance
Pv16.582,Pleuronectid spp.,,", ",M. Lance
Pv16.582,Pleuronectid spp.,,", ",M. Lance
Pv16.583,Porichthys notatus,,", ",M. Lance
Pv16.583,Porichthys notatus,,", ",M. Lance
Pv16.583,Porichthys notatus,,", ",M. Lance
Pv16.583,Cymatogaster aggregata,,", ",M. Lance
Pv16.584,Porichthys notatus,,", ",M. Lance
Pv16.585,Clupea pallasi,,", ",M. Lance
Pv16.586,Osmerid spp.,,", ",M. Lance
Pv16.586,Cymatogaster aggregata,,", ",M. Lance
Pv16.586,Cymatogaster aggregata,,", ",M. Lance
Pv16.586,Cymatogaster aggregata,,", ",M. Lance
Pv16.586,Porichthys notatus,,", ",M. Lance
Pv16.586,Porichthys notatus,,", ",M. Lance
Pv16.586,Porichthys notatus,,", ",M. Lance
Pv16.586,Leptocottus armatus,,", ",M. Lance
Pv16.586,Leptocottus armatus,,", ",M. Lance
Pv16.586,Leptocottus armatus,,", ",M. Lance
Pv16.586,Pleuronectid spp.,,", ",M. Lance
Pv16.586,Pleuronectid spp.,,", ",M. Lance
Pv16.586,Pleuronectid spp.,,", ",M. Lance
Pv16.586,Osmerid spp.,,", ",M. Lance
Pv16.587,Clupea pallasi,,", ",M. Lance
Pv16.587,Clupea pallasi,,", ",M. Lance
Pv16.587,Clupea pallasi,,", ",M. Lance
Pv16.587,Porichthys notatus,,", ",M. Lance
Pv16.587,Porichthys notatus,,", ",M. Lance
Pv16.588,Cymatogaster aggregata,,", ",M. Lance
Pv16.588,Cymatogaster aggregata,,", ",M. Lance
Pv16.588,Cymatogaster aggregata,,", ",M. Lance
Pv16.588,Porichthys notatus,,", ",M. Lance
Pv16.588,Porichthys notatus,,", ",M. Lance
Pv16.588,Porichthys notatus,,", ",M. Lance
Pv16.588,Ammodytes hexapteras,,", ",M. Lance
Pv16.588,Ammodytes hexapteras,,", ",M. Lance
Pv16.588,Ammodytes hexapteras,,", ",M. Lance
Pv16.588,Doryteuthis opalescens,,", ",M. Lance
Pv16.589,Porichthys notatus,,", ",M. Lance
Pv16.589,Porichthys notatus,,", ",M. Lance
Pv16.590,Porichthys notatus,,", ",M. Lance
Pv16.590,Porichthys notatus,,", ",M. Lance
Pv16.590,Porichthys notatus,,", ",M. Lance
Pv16.590,Pleuronectid spp.,,", ",M. Lance
Pv16.590,Leptocottus armatus,,", ",M. Lance
Pv16.592,Porichthys notatus,,", ",M. Lance
Pv16.592,Porichthys notatus,,", ",M. Lance
Pv16.592,Porichthys notatus,,", ",M. Lance
Pv16.592,Octopus rubescens,,", ",M. Lance
Pv16.593,Oncorhynchus sp.,Juvenile,"juvenile, ",M. Lance
Pv16.593,Aulorhynchus flavidus,,", ",M. Lance
Pv16.593,Citharichthys sp.,,", tiny juveniles",M. Lance
Pv16.594,Cymatogaster aggregata,,", ",M. Lance
Pv16.594,Cymatogaster aggregata,,", ",M. Lance
Pv16.594,Cymatogaster aggregata,,", ",M. Lance
Pv16.594,Porichthys notatus,,", ",M. Lance
Pv16.594,Porichthys notatus,,", ",M. Lance
Pv16.594,Porichthys notatus,,", ",M. Lance
Pv16.594,Theragra chalcogramma,,", ",M. Lance
Pv16.594,Theragra chalcogramma,,", ",M. Lance
Pv16.594,Theragra chalcogramma,,", ",M. Lance
Pv16.595,Clupea pallasi,,", ",M. Lance
Pv16.595,Clupea pallasi,,", ",M. Lance
Pv16.595,Clupea pallasi,,", ",M. Lance
Pv16.595,Cymatogaster aggregata,,", ",M. Lance
Pv16.595,Cymatogaster aggregata,,", ",M. Lance
Pv16.595,Cymatogaster aggregata,,", ",M. Lance
Pv16.595,Engraulis mordax,,", ",M. Lance
Pv16.595,Engraulis mordax,,", ",M. Lance
Pv16.595,Engraulis mordax,,", ",M. Lance
Pv16.597,Cymatogaster aggregata,,", ",M. Lance
Pv16.597,Cymatogaster aggregata,,", ",M. Lance
Pv16.597,Cymatogaster aggregata,,", ",M. Lance
Pv16.598,Porichthys notatus,,", ",M. Lance
Pv16.598,Theragra chalcogramma,,", ",M. Lance
Pv16.598,Theragra chalcogramma,,", ",M. Lance
Pv16.598,Engraulis mordax,,", ",M. Lance
Pv16.599,Pleuronectid spp.,,", ",M. Lance
Pv16.600,Cymatogaster aggregata,,", ",M. Lance
Pv16.600,Cymatogaster aggregata,,", ",M. Lance
Pv16.600,Cymatogaster aggregata,,", ",M. Lance
Pv16.600,Doryteuthis opalescens,,", ",M. Lance
Pv16.600,Doryteuthis opalescens,,", ",M. Lance
Pv16.601,Alosa sapidissima,,", ",M. Lance
Pv16.601,Porichthys notatus,,", ",M. Lance
Pv16.601,Porichthys notatus,,", ",M. Lance
Pv16.601,Doryteuthis opalescens,,", ",M. Lance
Pv16.601,Doryteuthis opalescens,,", ",M. Lance
Pv16.602,Cymatogaster aggregata,,", ",M. Lance
Pv16.602,Cymatogaster aggregata,,", ",M. Lance
Pv16.602,Clupea pallasi,,", ",M. Lance
Pv16.603,Porichthys notatus,,", ",M. Lance
Pv16.603,Porichthys notatus,,", ",M. Lance
Pv16.603,Porichthys notatus,,", ",M. Lance
Pv16.603,Cymatogaster aggregata,,", ",M. Lance
Pv16.603,Cymatogaster aggregata,,", ",M. Lance
Pv16.603,Cymatogaster aggregata,,", ",M. Lance
Pv16.603,Merluccius productus,,", ",M. Lance
Pv16.603,Merluccius productus,,", ",M. Lance
Pv16.603,Merluccius productus,,", ",M. Lance
Pv16.603,Theragra chalcogramma,,", ",M. Lance
Pv16.603,Theragra chalcogramma,,", ",M. Lance
Pv16.603,Theragra chalcogramma,,", ",M. Lance
Pv16.603,Pleuronectid spp.,,", ",M. Lance
Pv16.603,Pleuronectid spp.,,", ",M. Lance
Pv16.603,Pleuronectid spp.,,", ",M. Lance
Pv16.603,Octopus rubescens,,", ",M. Lance
Pv16.603,Octopus rubescens,,", ",M. Lance
Pv16.604,Cymatogaster aggregata,,", ",M. Lance
Pv16.604,Gadid or Merluccid,,", ",M. Lance
Pv16.604,Porichthys notatus,,", ",M. Lance
Pv16.605,Sebastes spp. (type 1),,", ",M. Lance
Pv16.605,Sebastes spp. (type 1),,", ",M. Lance
Pv16.605,Sebastes spp. (type 1),,", ",M. Lance
Pv16.605,Merluccius productus,,", ",M. Lance
Pv16.605,Octopus rubescens,,", ",M. Lance
Pv16.605,Doryteuthis opalescens,,", ",M. Lance
Pv16.606,Merluccius productus,,", ",M. Lance
Pv16.606,Merluccius productus,,", ",M. Lance
Pv16.606,Pleuronectid spp.,,", ",M. Lance
Pv16.607,Gadid or Merluccid,,", ",M. Lance
Pv16.607,Porichthys notatus,,", ",M. Lance
Pv16.608,Theragra chalcogramma,,", ",M. Lance
Pv16.608,Theragra chalcogramma,,", ",M. Lance
Pv16.608,Liparid spp.,,", ",M. Lance
Pv16.609,Oncorhynchus tshawytscha,Juvenile,"juvenile, ",M. Lance
Pv16.610,Oncorhynchus tshawytscha,Juvenile,"juvenile, ",M. Lance
Pv16.611,Oncorhynchus tshawytscha,Juvenile,"juveniles, ",M. Lance
Pv16.612,Gadid or Merluccid,,", ",M. Lance
Pv16.613,Merluccius productus,,", ",M. Lance
Pv16.613,Cottid spp.,,", ",M. Lance
Pv16.614,Porichthys notatus,,", ",M. Lance
Pv16.614,Porichthys notatus,,", ",M. Lance
Pv16.614,Porichthys notatus,,", ",M. Lance
Pv16.614,Cymatogaster aggregata,,", ",M. Lance
Pv16.614,Cymatogaster aggregata,,", ",M. Lance
Pv16.614,Cymatogaster aggregata,,", ",M. Lance
Pv16.614,Theragra chalcogramma,,", ",M. Lance
Pv16.614,Theragra chalcogramma,,", ",M. Lance
Pv16.614,Theragra chalcogramma,,", ",M. Lance
Pv16.614,Merluccius productus,,", ",M. Lance
Pv16.614,Merluccius productus,,", ",M. Lance
Pv16.614,Merluccius productus,,", ",M. Lance
Pv16.615,Alosa sapidissima,,", ",M. Lance
Pv16.615,Porichthys notatus,,", ",M. Lance
Pv16.615,Porichthys notatus,,", ",M. Lance
Pv16.615,Leptocottus armatus,,", ",M. Lance
Pv16.615,Leptocottus armatus,,", ",M. Lance
Pv16.615,Rajid spp.,,", ",M. Lance
Pv16.615,Clupeid spp.,,", ",M. Lance
Pv16.616,Porichthys notatus,,", ",M. Lance
Pv16.616,Porichthys notatus,,", ",M. Lance
Pv16.616,Engraulis mordax,,", ",M. Lance
Pv16.616,Theragra chalcogramma,,", ",M. Lance
Pv16.616,Theragra chalcogramma,,", ",M. Lance
Pv16.616,Merluccius productus,,", ",M. Lance
Pv16.616,Merluccius productus,,", ",M. Lance
Pv16.616,Merluccius productus,,", ",M. Lance
Pv16.616,Ammodytes hexapteras,,", ",M. Lance
Pv16.616,Ammodytes hexapteras,,", ",M. Lance
Pv16.616,Ammodytes hexapteras,,", ",M. Lance
Pv16.616,Squalus suckleyi,,", ",M. Lance
Pv16.618,Squalus suckleyi,,", ",M. Lance
Pv16.618,Gadid or Merluccid,,", ",M. Lance
Pv16.618,Pleuronectid spp.,,", ",M. Lance
Pv16.618,Porichthys notatus,,", ",M. Lance
Pv16.618,Octopus rubescens,,", ",M. Lance
Pv16.618,Octopus rubescens,,", ",M. Lance
Pv16.619,Gadid or Merluccid,,", ",M. Lance
Pv16.620,Unidentifiable fish spp.,,", ",M. Lance
Pv16.622,Porichthys notatus,,", ",M. Lance
Pv16.623,Gadid or Merluccid,,", ",M. Lance
Pv16.623,Cymatogaster aggregata,,", ",M. Lance
Pv16.623,Alosa sapidissima,,", ",M. Lance
Pv16.624,Porichthys notatus,,", ",M. Lance
Pv16.624,Gadid or Merluccid,,", ",M. Lance
Pv16.624,Pleuronectid spp.,,", ",M. Lance
Pv16.625,Gadid or Merluccid,,", ",M. Lance
Pv16.626,Gadid or Merluccid,,", ",M. Lance
Pv16.627,Merluccius productus,,", ",M. Lance
Pv16.627,Merluccius productus,,", ",M. Lance
Pv16.628,Gadid or Merluccid,,", ",M. Lance
Pv16.628,Cymatogaster aggregata,,", ",M. Lance
Pv16.628,Leptocottus armatus,,", ",M. Lance
Pv16.629,Cymatogaster aggregata,,", ",M. Lance
Pv16.629,Cymatogaster aggregata,,", ",M. Lance
Pv16.629,Cymatogaster aggregata,,", ",M. Lance
Pv16.629,Gadid or Merluccid,,", ",M. Lance
Pv16.629,Lampetra ayresii,,", ",M. Lance
Pv16.629,Clupeid spp.,,", ",M. Lance
Pv16.629,Pholid spp.,,", ",M. Lance
Pv16.630,Merluccius productus,,", ",M. Lance
Pv16.630,Porichthys notatus,,", ",M. Lance
Pv16.630,Alosa sapidissima,,", ",M. Lance
Pv16.630,Pleuronectid spp.,,", ",M. Lance
Pv16.631,Merluccius productus,,", ",M. Lance
Pv16.632,Merluccius productus,,", ",M. Lance
Pv16.632,Porichthys notatus,,", ",M. Lance
Pv16.633,Theragra chalcogramma,,", ",M. Lance
Pv16.633,Theragra chalcogramma,,", ",M. Lance
Pv16.633,Theragra chalcogramma,,", ",M. Lance
Pv16.633,Merluccius productus,,", ",M. Lance
Pv16.633,Merluccius productus,,", ",M. Lance
Pv16.633,Merluccius productus,,", ",M. Lance
Pv16.633,Porichthys notatus,,", ",M. Lance
Pv16.633,Porichthys notatus,,", ",M. Lance
Pv16.633,Porichthys notatus,,", ",M. Lance
Pv16.633,Doryteuthis opalescens,,", ",M. Lance
Pv16.633,Doryteuthis opalescens,,", ",M. Lance
Pv16.634,Porichthys notatus,,", ",M. Lance
Pv16.634,Gadid or Merluccid,,", ",M. Lance
Pv16.635,Porichthys notatus,,", ",M. Lance
Pv16.635,Porichthys notatus,,", ",M. Lance
Pv16.635,Merluccius productus,,", ",M. Lance
Pv16.635,Merluccius productus,,", ",M. Lance
Pv16.636,Gadid or Merluccid,,", ",M. Lance
Pv16.636,Pleuronectid spp.,,", ",M. Lance
Pv16.636,Rajid spp.,,", ",M. Lance
Pv16.637,Cymatogaster aggregata,,", ",M. Lance
Pv16.637,Cymatogaster aggregata,,", ",M. Lance
Pv16.637,Cymatogaster aggregata,,", ",M. Lance
Pv16.637,Clupeid spp.,,", ",M. Lance
Pv16.638,Gadid or Merluccid,,", ",M. Lance
Pv16.638,Squalus suckleyi,,", ",M. Lance
Pv16.638,Clupea pallasi,,", ",M. Lance
Pv16.639,Porichthys notatus,,", ",M. Lance
Pv16.639,Porichthys notatus,,", ",M. Lance
Pv16.639,Theragra chalcogramma,,", ",M. Lance
Pv16.639,Theragra chalcogramma,,", ",M. Lance
Pv16.639,Theragra chalcogramma,,", ",M. Lance
Pv16.639,Pleuronectid spp.,,", ",M. Lance
Pv16.639,Pleuronectid spp.,,", ",M. Lance
Pv16.639,Cottid spp.,,", ",M. Lance
Pv16.640,Cymatogaster aggregata,,", ",M. Lance
Pv16.640,Cymatogaster aggregata,,", ",M. Lance
Pv16.640,Cymatogaster aggregata,,", ",M. Lance
Pv16.640,Theragra chalcogramma,,", ",M. Lance
Pv16.640,Theragra chalcogramma,,", ",M. Lance
Pv16.640,Porichthys notatus,,", ",M. Lance
Pv16.640,Porichthys notatus,,", ",M. Lance
Pv16.641,Gadid or Merluccid,,", ",M. Lance
Pv16.642,Porichthys notatus,,", ",M. Lance
Pv16.642,Porichthys notatus,,", ",M. Lance
Pv16.642,Porichthys notatus,,", ",M. Lance
Pv16.642,Merluccius productus,,", ",M. Lance
Pv16.642,Merluccius productus,,", ",M. Lance
Pv16.642,Merluccius productus,,", ",M. Lance
Pv16.642,Rajid spp.,,", ",M. Lance
Pv16.642,Pholid spp.,,", ",M. Lance
Pv16.643,Cymatogaster aggregata,,", ",M. Lance
Pv16.643,Cymatogaster aggregata,,", ",M. Lance
Pv16.644,Gadid or Merluccid,,", ",M. Lance
Pv16.645,Gadid or Merluccid,,", ",M. Lance
Pv16.645,Gadid or Merluccid,,", ",M. Lance
Pv16.646,Porichthys notatus,,", ",M. Lance
Pv16.646,Porichthys notatus,,", ",M. Lance
Pv16.646,Gadid or Merluccid,,", ",M. Lance
Pv16.646,Pleuronectid spp.,,", ",M. Lance
Pv16.646,Octopus rubescens,,", ",M. Lance
Pv16.646,Octopus rubescens,,", ",M. Lance
Pv16.647,Alosa sapidissima,,", ",M. Lance
Pv16.647,Porichthys notatus,,", ",M. Lance
Pv16.647,Porichthys notatus,,", ",M. Lance
Pv16.647,Porichthys notatus,,", ",M. Lance
Pv16.647,Theragra chalcogramma,,", ",M. Lance
Pv16.647,Theragra chalcogramma,,", ",M. Lance
Pv16.647,Theragra chalcogramma,,", ",M. Lance
Pv16.648,Porichthys notatus,,", ",M. Lance
Pv16.648,Porichthys notatus,,", ",M. Lance
Pv16.648,Porichthys notatus,,", ",M. Lance
Pv16.648,Cymatogaster aggregata,,", ",M. Lance
Pv16.648,Cymatogaster aggregata,,", ",M. Lance
Pv16.648,Cymatogaster aggregata,,", ",M. Lance
Pv16.648,Theragra chalcogramma,,", ",M. Lance
Pv16.648,Theragra chalcogramma,,", ",M. Lance
Pv16.648,Merluccius productus,,", ",M. Lance
Pv16.648,Merluccius productus,,", ",M. Lance
Pv16.648,Merluccius productus,,", ",M. Lance
Pv16.649,Theragra chalcogramma,,", ",M. Lance
Pv16.649,Theragra chalcogramma,,", ",M. Lance
Pv16.649,Cymatogaster aggregata,,", ",M. Lance
Pv16.650,Theragra chalcogramma,,", ",M. Lance
Pv16.650,Theragra chalcogramma,,", ",M. Lance
Pv16.650,Cymatogaster aggregata,,", ",M. Lance
Pv16.650,Cymatogaster aggregata,,", ",M. Lance
Pv16.650,Cymatogaster aggregata,,", ",M. Lance
Pv16.650,Porichthys notatus,,", ",M. Lance
Pv16.650,Porichthys notatus,,", ",M. Lance
Pv16.651,Porichthys notatus,,", ",M. Lance
Pv16.651,Porichthys notatus,,", ",M. Lance
Pv16.651,Merluccius productus,,", ",M. Lance
Pv16.651,Merluccius productus,,", ",M. Lance
Pv16.651,Merluccius productus,,", ",M. Lance
Pv16.651,Theragra chalcogramma,,", ",M. Lance
Pv16.651,Theragra chalcogramma,,", ",M. Lance
Pv16.653,Cymatogaster aggregata,,", ",M. Lance
Pv16.653,Cymatogaster aggregata,,", ",M. Lance
Pv16.653,Cymatogaster aggregata,,", ",M. Lance
Pv16.654,Gadid or Merluccid,,", ",M. Lance
Pv16.655,Gadid or Merluccid,,", ",M. Lance
Pv16.655,Cymatogaster aggregata,,", ",M. Lance
Pv16.656,Merluccius productus,,", ",M. Lance
Pv16.656,Merluccius productus,,", ",M. Lance
Pv16.656,Merluccius productus,,", ",M. Lance
Pv16.656,Porichthys notatus,,", ",M. Lance
Pv16.656,Porichthys notatus,,", ",M. Lance
Pv16.657,Merluccius productus,,", ",M. Lance
Pv16.657,Merluccius productus,,", ",M. Lance
Pv16.658,Merluccius productus,,", ",M. Lance
Pv16.658,Merluccius productus,,", ",M. Lance
Pv16.659,Pleuronectid spp.,,", ",M. Lance
Pv16.659,Gadid or Merluccid,,", ",M. Lance
Pv16.660,Clupeid spp.,,", ",M. Lance
Pv16.660,Merluccius productus,,", ",M. Lance
Pv16.660,Merluccius productus,,", ",M. Lance
Pv16.660,Merluccius productus,,", ",M. Lance
Pv16.661,Cymatogaster aggregata,,", ",M. Lance
Pv16.661,Cymatogaster aggregata,,", ",M. Lance
Pv16.661,Cymatogaster aggregata,,", ",M. Lance
Pv16.661,Porichthys notatus,,", ",M. Lance
Pv16.661,Porichthys notatus,,", ",M. Lance
Pv16.661,Doryteuthis opalescens,,", ",M. Lance
Pv16.663,Gadid or Merluccid,,", ",M. Lance
Pv16.664,Gadid or Merluccid,,", ",M. Lance
Pv16.665,Merluccius productus,,", ",M. Lance
Pv16.665,Merluccius productus,,", ",M. Lance
Pv16.665,Merluccius productus,,", ",M. Lance
Pv16.665,Alosa sapidissima,,", ",M. Lance
Pv16.665,Lampetra ayresii,,", ",M. Lance
Pv16.666,Gadid or Merluccid,,", ",M. Lance
Pv16.666,Gadid or Merluccid,,", ",M. Lance
Pv16.666,Porichthys notatus,,", ",M. Lance
Pv16.667,Porichthys notatus,,", ",M. Lance
Pv16.667,Alosa sapidissima,,", ",M. Lance
Pv16.668,Clupea pallasi,,", ",M. Lance
Pv16.668,Clupea pallasi,,", ",M. Lance
Pv16.668,Clupea pallasi,,", ",M. Lance
Pv16.668,Cymatogaster aggregata,,", ",M. Lance
Pv16.668,Cymatogaster aggregata,,", ",M. Lance
Pv16.668,Merluccius productus,,", ",M. Lance
Pv16.668,Merluccius productus,,", ",M. Lance
Pv16.668,Merluccius productus,,", ",M. Lance
Pv16.669,Gadid or Merluccid,,", ",M. Lance
Pv16.670,Merluccius productus,,", ",M. Lance
Pv16.670,Merluccius productus,,", ",M. Lance
Pv16.671,Alosa sapidissima,,", ",M. Lance
Pv16.671,Alosa sapidissima,,", ",M. Lance
Pv16.672,Cymatogaster aggregata,,", ",M. Lance
Pv16.672,Gadid or Merluccid,,", ",M. Lance
Pv16.673,Gadid or Merluccid,,", ",M. Lance
Pv16.673,Doryteuthis opalescens,,", ",M. Lance
Pv16.673,Doryteuthis opalescens,,", ",M. Lance
Pv16.674,Clupeid spp.,,", ",M. Lance
Pv16.674,Doryteuthis opalescens,,", ",M. Lance
Pv16.674,Doryteuthis opalescens,,", ",M. Lance
Pv16.675,Cymatogaster aggregata,,", ",M. Lance
Pv16.675,Cymatogaster aggregata,,", ",M. Lance
Pv16.675,Cymatogaster aggregata,,", ",M. Lance
Pv16.675,Doryteuthis opalescens,,", ",M. Lance
Pv16.675,Doryteuthis opalescens,,", ",M. Lance
Pv16.676,Cymatogaster aggregata,,", ",M. Lance
Pv16.676,Cymatogaster aggregata,,", ",M. Lance
Pv16.676,Cymatogaster aggregata,,", ",M. Lance
Pv16.676,Doryteuthis opalescens,,", ",M. Lance
Pv16.676,Doryteuthis opalescens,,", ",M. Lance
Pv16.677,Porichthys notatus,,", ",M. Lance
Pv16.677,Porichthys notatus,,", ",M. Lance
Pv16.677,Cymatogaster aggregata,,", ",M. Lance
Pv16.677,Cymatogaster aggregata,,", ",M. Lance
Pv16.677,Cottid spp.,,", ",M. Lance
Pv16.677,Doryteuthis opalescens,,", ",M. Lance
Pv16.677,Doryteuthis opalescens,,", ",M. Lance
Pv16.678,Cottid spp.,,", ",M. Lance
Pv16.678,Engraulis mordax,,", ",M. Lance
Pv16.679,Porichthys notatus,,", ",M. Lance
Pv16.679,Porichthys notatus,,", ",M. Lance
Pv16.679,Porichthys notatus,,", ",M. Lance
Pv16.679,Cymatogaster aggregata,,", ",M. Lance
Pv16.679,Cymatogaster aggregata,,", ",M. Lance
Pv16.679,Pleuronectid spp.,,", ",M. Lance
Pv16.679,Doryteuthis opalescens,,", ",M. Lance
Pv16.679,Doryteuthis opalescens,,", ",M. Lance
Pv16.680,Cottid spp.,,", ",M. Lance
Pv16.680,Cottid spp.,,", ",M. Lance
Pv16.680,Doryteuthis opalescens,,", ",M. Lance
Pv16.680,Doryteuthis opalescens,,", ",M. Lance
Pv16.684,Leptocottus armatus,,", ",M. Lance
Pv16.684,Leptocottus armatus,,", ",M. Lance
Pv16.684,Leptocottus armatus,,", ",M. Lance
Pv16.684,Cottid spp.,,", ",M. Lance
Pv16.684,Cottid spp.,,", ",M. Lance
Pv16.684,Cottid spp.,,", ",M. Lance
Pv16.684,Pholid spp.,,", ",M. Lance
Pv16.684,Pleuronectid spp.,,", ",M. Lance
Pv16.685,Oncorhynchus kisutch,Juvenile,"juveniles, ",M. Lance
Pv16.686,Alosa sapidissima,,", ",M. Lance
Pv16.686,Merluccius productus,,", ",M. Lance
Pv16.687,Porichthys notatus,,", ",M. Lance
Pv16.687,Porichthys notatus,,", ",M. Lance
Pv16.687,Porichthys notatus,,", ",M. Lance
Pv16.687,Merluccius productus,,", ",M. Lance
Pv16.687,Merluccius productus,,", ",M. Lance
Pv16.687,Merluccius productus,,", ",M. Lance
Pv16.687,Platichthys stellatus,,", ",M. Lance
Pv16.687,Platichthys stellatus,,", ",M. Lance
Pv16.687,Platichthys stellatus,,", ",M. Lance
Pv16.688,Cymatogaster aggregata,,", ",M. Lance
Pv16.688,Cymatogaster aggregata,,", ",M. Lance
Pv16.688,Engraulis mordax,,", ",M. Lance
Pv16.688,Engraulis mordax,,", ",M. Lance
Pv16.688,Engraulis mordax,,", ",M. Lance
Pv16.688,Porichthys notatus,,", ",M. Lance
Pv16.688,Porichthys notatus,,", ",M. Lance
Pv16.688,Leptocottus armatus,,", ",M. Lance
Pv16.688,Pleuronectid spp.,,", ",M. Lance
Pv16.688,Pleuronectid spp.,,", ",M. Lance
Pv16.688,Pleuronectid spp.,,", ",M. Lance
Pv16.689,Oncorhynchus sp.,Juvenile,"juvenile, ",M. Lance
Pv16.690,Porichthys notatus,,", ",M. Lance
Pv16.690,Doryteuthis opalescens,,", ",M. Lance
Pv16.691,Merluccius productus,,", ",M. Lance
Pv16.691,Merluccius productus,,", ",M. Lance
Pv16.691,Merluccius productus,,", ",M. Lance
Pv16.691,Lampetra ayresii,,", ",M. Lance
Pv16.692,Clupea pallasi,,", ",M. Lance
Pv16.692,Gadid or Merluccid,,", ",M. Lance
Pv16.693,Clupea pallasi,,", ",M. Lance
Pv16.694,Clupeid spp.,,", ",M. Lance
Pv16.694,Merluccius productus,,", ",M. Lance
Pv16.695,Merluccius productus,,", ",M. Lance
Pv16.695,Merluccius productus,,", ",M. Lance
Pv16.695,Merluccius productus,,", ",M. Lance
Pv16.695,Lampetra ayresii,,", ",M. Lance
Pv16.695,Clupea pallasi,,", ",M. Lance
Pv16.696,Merluccius productus,,", ",M. Lance
Pv16.696,Merluccius productus,,", ",M. Lance
Pv16.696,Merluccius productus,,", ",M. Lance
Pv16.696,Clupea pallasi,,", ",M. Lance
Pv16.699,Oncorhynchus tshawytscha,Juvenile,"juvenile, ",M. Lance
Pv16.700,Clupea pallasi,,", ",M. Lance
Pv16.701,Porichthys notatus,,", ",M. Lance
Pv16.701,Merluccius productus,,", ",M. Lance
Pv16.701,Merluccius productus,,", ",M. Lance
Pv16.701,Alosa sapidissima,,", ",M. Lance
Pv16.702,Merluccius productus,,", ",M. Lance
Pv16.702,Merluccius productus,,", ",M. Lance
Pv16.702,Merluccius productus,,", ",M. Lance
Pv16.702,Clupeid spp.,,", ",M. Lance
Pv16.703,Clupeid spp.,,", ",M. Lance
Pv16.704,Clupea pallasi,,", ",M. Lance
Pv16.705,Merluccius productus,,", ",M. Lance
Pv16.705,Merluccius productus,,", ",M. Lance
Pv16.705,Clupeid spp.,,", ",M. Lance
Pv16.706,Gadid or Merluccid,,", ",M. Lance
Pv16.706,Gadid or Merluccid,,", ",M. Lance
Pv16.707,Gadid or Merluccid,,", ",M. Lance
Pv16.708,Porichthys notatus,,", ",M. Lance
Pv16.709,Merluccius productus,,", ",M. Lance
Pv16.709,Merluccius productus,,", ",M. Lance
Pv16.709,Merluccius productus,,", ",M. Lance
Pv16.709,Rajid spp.,,", ",M. Lance
Pv16.710,Cottid spp.,,", ",M. Lance
Pv16.710,Clupea pallasi,,", ",M. Lance
Pv16.710,Cottid spp.,,", ",M. Lance
Pv16.711,Merluccius productus,,", ",M. Lance
Pv16.711,Merluccius productus,,", ",M. Lance
Pv16.712,Cymatogaster aggregata,,", ",M. Lance
Pv16.712,Cymatogaster aggregata,,", ",M. Lance
Pv16.712,Porichthys notatus,,", ",M. Lance
Pv16.712,Merluccius productus,,", ",M. Lance
Pv16.712,Merluccius productus,,", ",M. Lance
Pv16.712,Merluccius productus,,", ",M. Lance
Pv16.712,Theragra chalcogramma,,", ",M. Lance
Pv16.712,Theragra chalcogramma,,", ",M. Lance
Pv16.712,Theragra chalcogramma,,", ",M. Lance
Pv16.712,Octopus rubescens,,", ",M. Lance
Pv16.713,Clupea pallasi,,", ",M. Lance
Pv16.713,Clupea pallasi,,", ",M. Lance
Pv16.713,Clupea pallasi,,", ",M. Lance
Pv16.713,Merluccius productus,,", ",M. Lance
Pv16.713,Merluccius productus,,", ",M. Lance
Pv16.714,Merluccius productus,,", ",M. Lance
Pv16.714,Merluccius productus,,", ",M. Lance
Pv16.714,Merluccius productus,,", ",M. Lance
Pv16.714,Alosa sapidissima,,", ",M. Lance
Pv16.715,Oncorhynchus tshawytscha,Juvenile,"smolt, ",M. Lance
Pv16.716,Merluccius productus,,", ",M. Lance
Pv16.716,Merluccius productus,,", ",M. Lance
Pv16.716,Alosa sapidissima,,", ",M. Lance
Pv16.716,Alosa sapidissima,,", ",M. Lance
Pv16.716,Porichthys notatus,,", ",M. Lance
Pv16.717,Lampetra ayresii,,", ",M. Lance
Pv16.717,Alosa sapidissima,,", ",M. Lance
Pv16.717,Alosa sapidissima,,", ",M. Lance
Pv16.717,Merluccius productus,,", ",M. Lance
Pv16.717,Merluccius productus,,", ",M. Lance
Pv16.717,Merluccius productus,,", ",M. Lance
Pv16.718,Merluccius productus,,", ",M. Lance
Pv16.718,Merluccius productus,,", ",M. Lance
Pv16.718,Alosa sapidissima,,", ",M. Lance
Pv16.718,Alosa sapidissima,,", ",M. Lance
Pv16.718,Porichthys notatus,,", ",M. Lance
Pv16.719,Oncorhynchus tshawytscha,Juvenile,"juvenile, ",M. Lance
Pv16.722,Clupea pallasi,,", ",M. Lance
Pv16.722,Clupea pallasi,,", ",M. Lance
Pv16.722,Clupea pallasi,,", ",M. Lance
Pv16.722,Merluccius productus,,", ",M. Lance
Pv16.722,Cymatogaster aggregata,,", ",M. Lance
Pv16.722,Cymatogaster aggregata,,", ",M. Lance
Pv16.723,Clupea pallasi,,", ",M. Lance
Pv16.723,Clupea pallasi,,", ",M. Lance
Pv16.723,Clupea pallasi,,", ",M. Lance
Pv16.723,Merluccius productus,,", ",M. Lance
Pv16.723,Merluccius productus,,", ",M. Lance
Pv16.723,Merluccius productus,,", ",M. Lance
Pv16.723,Alosa sapidissima,,", ",M. Lance
Pv16.723,Alosa sapidissima,,", ",M. Lance
Pv16.724,Clupea pallasi,,", ",M. Lance
Pv16.724,Clupea pallasi,,", ",M. Lance
Pv16.724,Clupea pallasi,,", ",M. Lance
Pv16.725,Merluccius productus,,", ",M. Lance
Pv16.725,Alosa sapidissima,,", ",M. Lance
Pv16.725,Clupea pallasi,,", ",M. Lance
Pv16.726,Clupea pallasi,,", ",M. Lance
Pv16.727,Clupea pallasi,,", ",M. Lance
Pv16.727,Clupea pallasi,,", ",M. Lance
Pv16.727,Clupea pallasi,,", ",M. Lance
Pv16.727,Alosa sapidissima,,", ",M. Lance
Pv16.729,Merluccius productus,,", ",M. Lance
Pv16.729,Merluccius productus,,", ",M. Lance
Pv16.729,Merluccius productus,,", ",M. Lance
Pv16.729,Clupea pallasi,,", ",M. Lance
Pv16.729,Clupea pallasi,,", ",M. Lance
Pv16.730,Alosa sapidissima,,", ",M. Lance
Pv16.731,Clupea pallasi,,", ",M. Lance
Pv16.731,Clupea pallasi,,", ",M. Lance
Pv16.731,Clupea pallasi,,", ",M. Lance
Pv16.733,Merluccius productus,,", ",M. Lance
Pv16.733,Clupea pallasi,,", ",M. Lance
Pv16.734,Merluccius productus,,", ",M. Lance
Pv16.734,Clupea pallasi,,", ",M. Lance
Pv16.735,Merluccius productus,,", ",M. Lance
Pv16.735,Merluccius productus,,", ",M. Lance
Pv16.735,Merluccius productus,,", ",M. Lance
Pv16.735,Alosa sapidissima,,", ",M. Lance
Pv16.735,Lampetra ayresii,,", ",M. Lance
Pv16.737,Clupea pallasi,,", ",M. Lance
Pv16.737,Clupea pallasi,,", ",M. Lance
Pv16.738,Clupeid spp.,,", ",M. Lance
Pv16.738,Merluccius productus,,", ",M. Lance
Pv16.739,Oncorhynchus sp.,Adult,"Adult ?, Age classification based on very large teeth and gillrakers",M. Lance
Pv16.740,Cottid spp.,,", ",M. Lance
Pv16.740,Cottid spp.,,", ",M. Lance
Pv16.740,Cottid spp.,,", ",M. Lance
Pv16.740,Pholid spp.,,", ",M. Lance
Pv16.740,Octopus rubescens,,", ",M. Lance
Pv16.740,Octopus rubescens,,", ",M. Lance
Pv16.741,Merluccius productus,,", ",M. Lance
Pv16.741,Merluccius productus,,", ",M. Lance
Pv16.741,Merluccius productus,,", ",M. Lance
Pv16.741,Clupea pallasi,,", ",M. Lance
Pv16.741,Clupea pallasi,,", ",M. Lance
Pv16.741,Clupea pallasi,,", ",M. Lance
Pv16.742,Oncorhynchus tshawytscha,Juvenile,"juvenile, ",M. Lance
Pv16.743,Merluccius productus,,", ",M. Lance
Pv16.743,Merluccius productus,,", ",M. Lance
Pv16.743,Merluccius productus,,", ",M. Lance
Pv16.743,Clupeid spp.,,", ",M. Lance
Pv16.744,Alosa sapidissima,,", ",M. Lance
Pv16.744,Gadid or Merluccid,,", ",M. Lance
Pv16.745,Oncorhynchus sp.,Juvenile,"juvenile, ",M. Lance
Pv16.745,Oncorhynchus sp.,Adult,"sub-adult, ",M. Lance
Pv16.746,Merluccius productus,,", ",M. Lance
Pv16.746,Merluccius productus,,", ",M. Lance
Pv16.746,Merluccius productus,,", ",M. Lance
Pv16.746,Clupea pallasi,,", ",M. Lance
Pv16.746,Clupea pallasi,,", ",M. Lance
Pv16.746,Clupea pallasi,,", ",M. Lance
Pv16.748,Clupea pallasi,,", ",M. Lance
Pv16.748,Clupea pallasi,,", ",M. Lance
Pv16.748,Merluccius productus,,", ",M. Lance
Pv16.750,Gadus macrocephalus,,", ",M. Lance
Pv16.750,Gadus macrocephalus,,", ",M. Lance
Pv16.750,Gadus macrocephalus,,", ",M. Lance
Pv16.750,Merluccius productus,,", ",M. Lance
Pv16.750,Merluccius productus,,", ",M. Lance
Pv16.751,Merluccius productus,,", ",M. Lance
Pv16.751,Clupea pallasi,,", ",M. Lance
Pv16.751,Clupea pallasi,,", ",M. Lance
Pv16.752,Merluccius productus,,", ",M. Lance
Pv16.752,Merluccius productus,,", ",M. Lance
Pv16.752,Merluccius productus,,", ",M. Lance
Pv16.752,Clupea pallasi,,", ",M. Lance
Pv16.752,Clupea pallasi,,", ",M. Lance
Pv16.753,Merluccius productus,,", ",M. Lance
Pv16.753,Merluccius productus,,", ",M. Lance
Pv16.754,Clupea pallasi,,", ",M. Lance
Pv16.754,Clupea pallasi,,", ",M. Lance
Pv16.756,Clupea pallasi,,", ",M. Lance
Pv16.756,Clupea pallasi,,", ",M. Lance
Pv16.756,Merluccius productus,,", ",M. Lance
Pv16.757,Clupea pallasi,,", ",M. Lance
Pv16.757,Clupea pallasi,,", ",M. Lance
Pv16.758,Clupea pallasi,,", ",M. Lance
Pv16.758,Lampetra ayresii,,", ",M. Lance
Pv16.759,Clupea pallasi,,", ",M. Lance
Pv16.759,Lampetra ayresii,,", ",M. Lance
Pv16.760,Clupea pallasi,,", ",M. Lance
Pv16.760,Clupea pallasi,,", ",M. Lance
Pv16.760,Clupea pallasi,,", ",M. Lance
Pv16.761,Merluccius productus,,", ",M. Lance
Pv16.761,Merluccius productus,,", ",M. Lance
Pv16.761,Merluccius productus,,", ",M. Lance
Pv16.761,Clupeid spp.,,", ",M. Lance
Pv16.762,Merluccius productus,,", ",M. Lance
Pv16.762,Merluccius productus,,", ",M. Lance
Pv16.762,Theragra chalcogramma,,", ",M. Lance
Pv16.763,Clupeid spp.,,", ",M. Lance
Pv16.763,Theragra chalcogramma,,", ",M. Lance
Pv16.763,Theragra chalcogramma,,", ",M. Lance
Pv16.763,Merluccius productus,,", ",M. Lance
Pv16.763,Merluccius productus,,", ",M. Lance
Pv16.765,Clupea pallasi,,", ",M. Lance
Pv16.765,Gadid or Merluccid,,", ",M. Lance
Pv16.766,Merluccius productus,,", ",M. Lance
Pv16.766,Merluccius productus,,", ",M. Lance
Pv16.766,Merluccius productus,,", ",M. Lance
Pv16.767,Oncorhynchus sp.,Adult,"adult, Age classification based on very large teeth and gillrakers",M. Lance
Pv16.767,Alosa sapidissima ,,", vertebrae",M. Lance
Pv16.769,Merluccius productus,,", ",M. Lance
Pv16.769,Clupea pallasi,,", ",M. Lance
Pv16.771,Oncorhynchus sp.,Juvenile,"juvenile, ",M. Lance
Pv16.772,Merluccius productus,,", ",M. Lance
Pv16.772,Merluccius productus,,", ",M. Lance
Pv16.772,Merluccius productus,,", ",M. Lance
Pv16.772,Porichthys notatus,,", ",M. Lance
Pv16.772,Porichthys notatus,,", ",M. Lance
Pv16.773,Merluccius productus,,", ",M. Lance
Pv16.773,Merluccius productus,,", ",M. Lance
Pv16.773,Merluccius productus,,", ",M. Lance
Pv16.774,Clupea pallasi,,", ",M. Lance
Pv16.774,Clupea pallasi,,", ",M. Lance
Pv16.774,Clupea pallasi,,", ",M. Lance
Pv16.775,Oncorhynchus tshawytscha,Juvenile,"smolts, ",M. Lance
Pv16.776,Clupea pallasi,,", ",M. Lance
Pv16.777,Clupea pallasi,,", ",M. Lance
Pv16.778,Oncorhynchus sp.,Juvenile,"juvenile, Age classification based on vertebral size",M. Lance
Pv16.779,Clupea pallasi,,", ",M. Lance
Pv16.779,Clupea pallasi,,", ",M. Lance
Pv16.780,Oncorhynchus tshawytscha,Juvenile,"juvenile, ",M. Lance
Pv16.781,Merluccius productus,,", ",M. Lance
Pv16.781,Clupea pallasi,,", ",M. Lance
Pv16.782,Clupea pallasi,,", ",M. Lance
Pv16.782,Clupea pallasi,,", ",M. Lance
Pv16.782,Clupea pallasi,,", ",M. Lance
Pv16.782,Alosa sapidissima,,", ",M. Lance
Pv16.783,Oncorhynchus tshawytscha,Juvenile,"juvenile, ",M. Lance
Pv16.783,Oncorhynchus mykiss,Juvenile,"juvenile, typical mykiss / clarkii type vertebrae",M. Lance
Pv16.786,Merluccius productus,,", ",M. Lance
Pv16.786,Merluccius productus,,", ",M. Lance
Pv16.786,Merluccius productus,,", ",M. Lance
Pv16.786,Theragra chalcogramma,,", ",M. Lance
Pv16.786,Theragra chalcogramma,,", ",M. Lance
Pv16.786,Clupeid spp.,,", ",M. Lance
Pv16.787,Clupea pallasi,,", ",M. Lance
Pv16.788,Clupea pallasi,,", ",M. Lance
Pv16.788,Clupea pallasi,,", ",M. Lance
Pv16.788,Cymatogaster aggregata,,", ",M. Lance
Pv16.788,Cymatogaster aggregata,,", ",M. Lance
Pv16.788,Gadid or Merluccid,,", ",M. Lance
Pv16.789,Oncorhynchus sp.,Juvenile,"juvenile, species unidentified (not chinook), original ot size probably juvenile ",M. Lance
Pv16.790,Pleuronectes vetulus,,", ",M. Lance
Pv16.790,Pleuronectes vetulus,,", ",M. Lance
Pv16.790,Pleuronectes vetulus,,", ",M. Lance
Pv16.790,Porichthys notatus,,", ",M. Lance
Pv16.790,Porichthys notatus,,", ",M. Lance
Pv16.790,Clupeid spp.,,", ",M. Lance
Pv16.790,Theragra chalcogramma,,", ",M. Lance
Pv16.790,Theragra chalcogramma,,", ",M. Lance
Pv16.791,Clupea pallasi,,", ",M. Lance
Pv16.792,Merluccius productus,,", ",M. Lance
Pv16.792,Merluccius productus,,", ",M. Lance
Pv16.793,Oncorhynchus tshawytscha,Adult,"sub-adult ?, ",M. Lance
Pv16.796,Oncorhynchus tshawytscha,Juvenile,"juveniles, ",M. Lance
Pv16.797,Alosa sapidissima,,", ",M. Lance
Pv16.797,Gadid or Merluccid,,", ",M. Lance
Pv16.798,Clupea pallasi,,", ",M. Lance
Pv16.798,Clupea pallasi,,", ",M. Lance
Pv16.798,Merluccius productus,,", ",M. Lance
Pv16.798,Merluccius productus,,", ",M. Lance
Pv16.798,Merluccius productus,,", ",M. Lance
Pv16.799,Oncorhynchus sp.,Adult,"Adult , Age classification based on very large teeth and gillrakers",M. Lance
Pv16.800,Merluccius productus,,", ",M. Lance
Pv16.800,Merluccius productus,,", ",M. Lance
Pv16.800,Merluccius productus,,", ",M. Lance
Pv16.800,Clupea pallasi,,", ",M. Lance
Pv16.800,Clupea pallasi,,", ",M. Lance
Pv16.800,Clupea pallasi,,", ",M. Lance
Pv16.802,Merluccius productus,,", ",M. Lance
Pv16.802,Merluccius productus,,", ",M. Lance
Pv16.802,Merluccius productus,,", ",M. Lance
Pv16.802,Clupea pallasi,,", ",M. Lance
Pv16.805,Clupea pallasi,,", ",M. Lance
Pv16.806,Merluccius productus,,", ",M. Lance
Pv16.806,Merluccius productus,,", ",M. Lance
Pv16.807,Clupea pallasi,,", ",M. Lance
Pv16.807,Gadid or Merluccid,,", ",M. Lance
Pv16.808,Alosa sapidissima,,", ",M. Lance
Pv16.808,Merluccius productus,,", ",M. Lance
Pv16.809,Clupea pallasi,,", ",M. Lance
Pv16.809,Merluccius productus,,", ",M. Lance
Pv16.810,Gadid or Merluccid,,", ",M. Lance
Pv16.812,Cymatogaster aggregata,,", ",M. Lance
Pv16.813,Clupeid spp.,,", ",M. Lance
Pv16.813,Merluccius productus,,", ",M. Lance
Pv16.813,Merluccius productus,,", ",M. Lance
Pv16.814,Merluccius productus,,", ",M. Lance
Pv16.814,Merluccius productus,,", ",M. Lance
Pv16.814,Merluccius productus,,", ",M. Lance
Pv16.815,Theragra chalcogramma,,", ",M. Lance
Pv16.815,Theragra chalcogramma,,", ",M. Lance
Pv16.815,Clupea pallasi,,", ",M. Lance
Pv16.816,Merluccius productus,,", ",M. Lance
Pv16.816,Merluccius productus,,", ",M. Lance
Pv16.816,Clupea pallasi,,", ",M. Lance
Pv16.816,Clupea pallasi,,", ",M. Lance
Pv16.816,Clupea pallasi,,", ",M. Lance
Pv16.817,Cottid spp.,,", ",M. Lance
Pv16.817,Clupeid spp.,,", ",M. Lance
Pv16.817,Pholid spp.,,", ",M. Lance
Pv16.817,Gadid or Merluccid,,", ",M. Lance
Pv16.818,Lampetra ayresii,,", ",M. Lance
Pv16.818,Merluccius productus,,", ",M. Lance
Pv16.818,Merluccius productus,,", ",M. Lance
Pv16.818,Merluccius productus,,", ",M. Lance
Pv16.818,Pholid spp.,,", ",M. Lance
Pv16.818,Alosa sapidissima,,", ",M. Lance
Pv16.819,Oncorhynchus sp.,Juvenile,"juveniles, ",M. Lance
Pv16.819,Oncorhynchus kisutch,Juvenile,"smolts, ",M. Lance
Pv16.822,Cymatogaster aggregata,,", ",M. Lance
Pv16.822,Cymatogaster aggregata,,", ",M. Lance
Pv16.822,Cymatogaster aggregata,,", ",M. Lance
Pv16.823,Oncorhynchus tshawytscha,Juvenile,"juvenile, Age classification based on mean vertebral size",M. Lance
Pv16.824,Cymatogaster aggregata,,", ",M. Lance
Pv16.824,Cymatogaster aggregata,,", ",M. Lance
Pv16.824,Cymatogaster aggregata,,", ",M. Lance
Pv16.824,Theragra chalcogramma,,", ",M. Lance
Pv16.824,Theragra chalcogramma,,", ",M. Lance
Pv16.824,Pleuronectid spp.,,", ",M. Lance
Pv16.824,Pleuronectid spp.,,", ",M. Lance
Pv16.824,Pleuronectid spp.,,", ",M. Lance
Pv16.824,Cottid spp.,,", ",M. Lance
Pv16.824,Cottid spp.,,", ",M. Lance
Pv16.824,Cottid spp.,,", ",M. Lance
Pv16.824,Ammodytes hexapteras,,", ",M. Lance
Pv16.824,Ammodytes hexapteras,,", ",M. Lance
Pv16.824,Ammodytes hexapteras,,", ",M. Lance
Pv16.824,Clupeid spp.,,", ",M. Lance
Pv16.826,Cymatogaster aggregata,,", ",M. Lance
Pv16.826,Leptocottus armatus,,", ",M. Lance
Pv16.826,Leptocottus armatus,,", ",M. Lance
Pv16.828,Osmerid spp.,,", ",M. Lance
Pv16.828,Osmerid spp.,,", ",M. Lance
Pv16.828,Osmerid spp.,,", ",M. Lance
Pv16.828,Pleuronectid spp.,,", ",M. Lance
Pv16.828,Pleuronectid spp.,,", ",M. Lance
Pv16.828,Pleuronectid spp.,,", ",M. Lance
Pv16.828,Cymatogaster aggregata,,", ",M. Lance
Pv16.828,Cymatogaster aggregata,,", ",M. Lance
Pv16.828,Leptocottus armatus,,", ",M. Lance
Pv16.828,Leptocottus armatus,,", ",M. Lance
Pv16.828,Leptocottus armatus,,", ",M. Lance
Pv16.829,Osmerid spp.,,", ",M. Lance
Pv16.829,Platichthys stellatus,,", ",M. Lance
Pv16.830,Cottid spp.,,", ",M. Lance
Pv16.830,Cottid spp.,,", ",M. Lance
Pv16.830,Osmerid spp.,,", ",M. Lance
Pv16.831,Cymatogaster aggregata,,", ",M. Lance
Pv16.831,Cymatogaster aggregata,,", ",M. Lance
Pv16.831,Cymatogaster aggregata,,", ",M. Lance
Pv16.831,Leptocottus armatus,,", ",M. Lance
Pv16.831,Leptocottus armatus,,", ",M. Lance
Pv16.831,Leptocottus armatus,,", ",M. Lance
Pv16.831,Osmerid spp.,,", ",M. Lance
Pv16.831,Osmerid spp.,,", ",M. Lance
Pv16.831,Osmerid spp.,,", ",M. Lance
Pv16.832,Leptocottus armatus,,", ",M. Lance
Pv16.832,Leptocottus armatus,,", ",M. Lance
Pv16.832,Pleuronectid spp.,,", ",M. Lance
Pv16.832,Pleuronectid spp.,,", ",M. Lance
Pv16.833,Cymatogaster aggregata,,", ",M. Lance
Pv16.833,Cymatogaster aggregata,,", ",M. Lance
Pv16.833,Cymatogaster aggregata,,", ",M. Lance
Pv16.834,Cymatogaster aggregata,,", ",M. Lance
Pv16.834,Cymatogaster aggregata,,", ",M. Lance
Pv16.834,Cymatogaster aggregata,,", ",M. Lance
Pv16.834,Osmerid spp.,,", ",M. Lance
Pv16.834,Osmerid spp.,,", ",M. Lance
Pv16.834,Leptocottus armatus,,", ",M. Lance
Pv16.834,Leptocottus armatus,,", ",M. Lance
Pv16.834,Leptocottus armatus,,", ",M. Lance
Pv16.836,Cymatogaster aggregata,,", ",M. Lance
Pv16.836,Cymatogaster aggregata,,", ",M. Lance
Pv16.836,Cymatogaster aggregata,,", ",M. Lance
Pv16.838,Oncorhynchus tshawytscha,Juvenile,"juvenile, Age classification based on vertebral size estimate",M. Lance
Pv16.839,Leptocottus armatus,,", ",M. Lance
Pv16.839,Leptocottus armatus,,", ",M. Lance
Pv16.839,Leptocottus armatus,,", ",M. Lance
Pv16.839,Pleuronectid spp.,,", ",M. Lance
Pv16.839,Pleuronectid spp.,,", ",M. Lance
Pv16.839,Cymatogaster aggregata,,", ",M. Lance
Pv16.839,Cymatogaster aggregata,,", ",M. Lance
Pv16.841,Cymatogaster aggregata,,", ",M. Lance
Pv16.841,Cymatogaster aggregata,,", ",M. Lance
Pv16.841,Cymatogaster aggregata,,", ",M. Lance
Pv16.841,Theragra chalcogramma,,", ",M. Lance
Pv16.841,Theragra chalcogramma,,", ",M. Lance
Pv16.841,Theragra chalcogramma,,", ",M. Lance
Pv16.841,Leptocottus armatus,,", ",M. Lance
Pv16.841,Leptocottus armatus,,", ",M. Lance
Pv16.841,Leptocottus armatus,,", ",M. Lance
Pv16.841,Engraulis mordax,,", ",M. Lance
Pv16.841,Engraulis mordax,,", ",M. Lance
Pv16.841,Engraulis mordax,,", ",M. Lance
Pv16.841,Pleuronectid spp.,,", ",M. Lance
Pv16.841,Pleuronectid spp.,,", ",M. Lance
Pv16.841,Pholid spp.,,", ",M. Lance
Pv16.841,Pholid spp.,,", ",M. Lance
Pv16.842,Leptocottus armatus,,", ",M. Lance
Pv16.842,Leptocottus armatus,,", ",M. Lance
Pv16.842,Leptocottus armatus,,", ",M. Lance
Pv16.843,Leptocottus armatus,,", ",M. Lance
Pv16.843,Leptocottus armatus,,", ",M. Lance
Pv16.843,Leptocottus armatus,,", ",M. Lance
Pv16.844,Unidentifiable fish spp.,,", ",M. Lance
Pv16.845,Engraulis mordax,,", ",M. Lance
Pv16.845,Engraulis mordax,,", ",M. Lance
Pv16.845,Engraulis mordax,,", ",M. Lance
Pv16.845,Clupea pallasi,,", ",M. Lance
Pv16.846,Leptocottus armatus,,", ",M. Lance
Pv16.846,Leptocottus armatus,,", ",M. Lance
Pv16.846,Leptocottus armatus,,", ",M. Lance
Pv16.846,Cymatogaster aggregata,,", ",M. Lance
Pv16.846,Cymatogaster aggregata,,", ",M. Lance
Pv16.846,Cymatogaster aggregata,,", ",M. Lance
Pv16.846,Doryteuthis opalescens,,", ",M. Lance
Pv16.847,Leptocottus armatus,,", ",M. Lance
Pv16.847,Leptocottus armatus,,", ",M. Lance
Pv16.847,Leptocottus armatus,,", ",M. Lance
Pv16.847,Pleuronectes vetulus,,", ",M. Lance
Pv16.847,Pleuronectes vetulus,,", ",M. Lance
Pv16.848,Cymatogaster aggregata,,", ",M. Lance
Pv16.848,Cymatogaster aggregata,,", ",M. Lance
Pv16.848,Cymatogaster aggregata,,", ",M. Lance
Pv16.848,Leptocottus armatus,,", ",M. Lance
Pv16.848,Leptocottus armatus,,", ",M. Lance
Pv16.848,Leptocottus armatus,,", ",M. Lance
Pv16.848,Pleuronectes vetulus,,", ",M. Lance
Pv16.848,Pleuronectes vetulus,,", ",M. Lance
Pv16.848,Pleuronectid spp.,,", ",M. Lance
Pv16.848,Pleuronectid spp.,,", ",M. Lance
Pv16.848,Pleuronectid spp.,,", ",M. Lance
Pv16.849,Leptocottus armatus,,", ",M. Lance
Pv16.849,Leptocottus armatus,,", ",M. Lance
Pv16.849,Leptocottus armatus,,", ",M. Lance
Pv16.849,Osmerid spp.,,", ",M. Lance
Pv16.849,Osmerid spp.,,", ",M. Lance
Pv16.850,Cymatogaster aggregata,,", ",M. Lance
Pv16.850,Cymatogaster aggregata,,", ",M. Lance
Pv16.850,Cymatogaster aggregata,,", ",M. Lance
Pv16.852,Pleuronectes vetulus,,", ",M. Lance
Pv16.852,Pleuronectes vetulus,,", ",M. Lance
Pv16.852,Gadid or Merluccid,,", ",M. Lance
Pv16.853,Clupeid spp.,,", ",M. Lance
Pv16.854,Gadid or Merluccid,,", ",M. Lance
Pv16.855,Merluccius productus,,", ",M. Lance
Pv16.856,Merluccius productus,,", ",M. Lance
Pv16.857,Oncorhynchus sp.,Juvenile,"juvenile, Age classification based on vertebral size ",M. Lance
Pv16.858,Porichthys notatus,,", ",M. Lance
Pv16.858,Porichthys notatus,,", ",M. Lance
Pv16.858,Porichthys notatus,,", ",M. Lance
Pv16.859,Oncorhynchus kisutch,Juvenile,"juvenile, ",M. Lance
Pv16.860,Porichthys notatus,,", ",M. Lance
Pv16.860,Porichthys notatus,,", ",M. Lance
Pv16.860,Porichthys notatus,,", ",M. Lance
Pv16.861,Merluccius productus,,", ",M. Lance
Pv16.861,Merluccius productus,,", ",M. Lance
Pv16.861,Alosa sapidissima,,", ",M. Lance
Pv16.862,Porichthys notatus,,", ",M. Lance
Pv16.862,Porichthys notatus,,", ",M. Lance
Pv16.863,Oncorhynchus sp.,Juvenile,"juvenile, Age classification based on vertebral size",M. Lance
Pv16.863,Oncorhynchus sp.,Juvenile,"juvenile, Age classification based on estimated vertebral size",M. Lance
Pv16.863,Peprilus simillimus,,", ",M. Lance
Pv16.864,Merluccius productus,,", ",M. Lance
Pv16.864,Merluccius productus,,", ",M. Lance
Pv16.864,Merluccius productus,,", ",M. Lance
Pv16.864,Clupea pallasi,,", ",M. Lance
Pv16.864,Clupea pallasi,,", ",M. Lance
Pv16.865,Clupea pallasi,,", ",M. Lance
Pv16.865,Clupea pallasi,,", ",M. Lance
Pv16.865,Ammodytes hexapteras,,", ",M. Lance
Pv16.866,Lampetra ayresii,,", ",M. Lance
Pv16.866,Merluccius productus,,", ",M. Lance
Pv16.866,Merluccius productus,,", ",M. Lance
Pv16.866,Merluccius productus,,", ",M. Lance
Pv16.866,Porichthys notatus,,", ",M. Lance
Pv16.866,Porichthys notatus,,", ",M. Lance
Pv16.866,Engraulis mordax,,", ",M. Lance
Pv16.866,Alosa sapidissima,,", ",M. Lance
Pv16.867,Alosa sapidissima,,", ",M. Lance
Pv16.867,Gadid or Merluccid,,", ",M. Lance
Pv16.868,Clupea pallasi,,", ",M. Lance
Pv16.868,Clupea pallasi,,", ",M. Lance
Pv16.868,Merluccius productus,,", ",M. Lance
Pv16.868,Merluccius productus,,", ",M. Lance
Pv16.A001,Clupea pallasi,,", ",S. Crockford
Pv16.A002,Clupea pallasi,,", ",S. Crockford
Pv16.A002,Merluccius productus,,", ",S. Crockford
Pv16.A003,Merluccius productus,,", ",S. Crockford
Pv16.A003,Clupea pallasi,,", ",S. Crockford
Pv16.A004,Clupea pallasi,,", ",S. Crockford
Pv16.A007,Clupea pallasi,,", ",S. Crockford
Pv16.A008,Clupea pallasi,,", ",S. Crockford
Pv16.A009,Cymatogaster gracilis,,", ",S. Crockford
Pv16.A009,Pholididae,,", ",S. Crockford
Pv16.A009,Pisces (none of the above),,", not hake but could be pollock or cod",S. Crockford
Pv16.A009,Merluccius productus,,", ",S. Crockford
Pv16.A010,Clupea pallasi,,", ",S. Crockford
Pv16.A010,Thaleichthys pacificus,,", could be v eroded salmon/",S. Crockford
Pv16.A011,Clupea pallasi,,", ",S. Crockford
Pv16.A011,Cymatogaster gracilis,,", ",S. Crockford
Pv16.A012,Merluccius productus,,", ",S. Crockford
Pv16.A013,Merluccius productus,,", ",S. Crockford
Pv16.A013,Clupea pallasi,,", ",S. Crockford
Pv16.A014,Clupea pallasi,,", ",S. Crockford
Pv16.A014,Gasterosteus aculaeatus,,", ",S. Crockford
Pv16.A014,Merluccius productus,,", ",S. Crockford
Pv16.A014,Gadus chalcogramma,,", ",S. Crockford
Pv16.A014,Embiotocidae,,", ",S. Crockford
Pv16.A015,Gadus chalcogramma,,", ",S. Crockford
Pv16.A015,Merluccius productus,,", ",S. Crockford
Pv16.A016,Cymatogaster gracilis,,", ",S. Crockford
Pv16.A017,Clupea pallasi,,", ",S. Crockford
Pv16.A018,Clupea pallasi,,", ",S. Crockford
Pv16.A018,Porichthys notatus,,", same side",S. Crockford
Pv16.A019,Gasterosteus aculaeatus,,", ",S. Crockford
Pv16.A019,Clupea pallasi,,", otos all the same side",S. Crockford
Pv16.A020,Clupea pallasi,,", ",S. Crockford
Pv16.A020,Merluccius productus,,", ",S. Crockford
Pv16.A021,Merluccius productus,,", ",S. Crockford
Pv16.A021,Gadus chalcogramma,,", ",S. Crockford
Pv16.A021,Porichthys notatus,,", ",S. Crockford
Pv16.A021,Clupea pallasi,,", ",S. Crockford
Pv16.A021,Lyopsetta exilis,,", ",S. Crockford
Pv16.A022,Clupea pallasi,,", ",S. Crockford
Pv16.A022,Gadus chalcogramma,,", ",S. Crockford
Pv16.A022,Merluccius productus,,", ",S. Crockford
Pv16.A022,Cymatogaster gracilis,,", ",S. Crockford
Pv16.A023,Clupea pallasi,,", ",S. Crockford
Pv16.A023,Merluccius productus,,", ",S. Crockford
Pv16.A024,Merluccius productus,,", ",S. Crockford
Pv16.A024,Clupea pallasi,,", ",S. Crockford
Pv16.A025,Clupea pallasi,,", ",S. Crockford
Pv16.A025,Merluccius productus,,", ",S. Crockford
Pv16.A026,Merluccius productus,,", ",S. Crockford
Pv16.A026,Clupea pallasi,,", ",S. Crockford
Pv16.A027,Clupea pallasi,,", ",S. Crockford
Pv16.A027,Raja sp.(unident),,", teeth are quite small",S. Crockford
Pv16.A027,Merluccius productus,,", ",S. Crockford
Pv16.A028,Merluccius productus,,", ",S. Crockford
Pv16.A028,Porichthys notatus,,", ",S. Crockford
Pv16.A028,Porichthys notatus,,", very eroded but likely midshipman also",S. Crockford
Pv16.A029,Merluccius productus,,", ",S. Crockford
Pv16.A029,Lyopsetta exilis,,", ",S. Crockford
Pv16.A030,Oncorhynchus sp.,Juvenile,"Juv, smolt",S. Crockford
Pv16.A030,Gasterosteus aculaeatus,,", ",S. Crockford
Pv16.A031,Gadus chalcogramma,,", ",S. Crockford
Pv16.A032,Gadus chalcogramma,,", ",S. Crockford
Pv16.A033,Clupea pallasi,,", ",S. Crockford
Pv16.A036,Cymatogaster gracilis,,", ",S. Crockford
Pv16.A036,Porichthys notatus,,", ",S. Crockford
Pv16.A037,Clupea pallasi,,", ",S. Crockford
Pv16.A037,Engraulis mordax,,", ",S. Crockford
Pv16.A037,Oncorhynchus sp.,Juvenile,"Juv, smolt sized",S. Crockford
Pv16.A037,Merluccius productus,,", ",S. Crockford
Pv16.A037,Gadus chalcogramma,,", Large is almost ""Very large""",S. Crockford
Pv16.A038,Oncorhynchus sp.,Adult,"Adult, adult",S. Crockford
Pv16.A038,Clupea pallasi,,", ",S. Crockford
Pv16.A039,Clupea pallasi,,", ",S. Crockford
Pv16.A040,Clupea pallasi,,", min. number; more may be stuck in squid mass",S. Crockford
Pv16.A040,Cymatogaster gracilis,,", min. number; more may be stuck in squid mass",S. Crockford
Pv16.A040,Merluccius productus,,", min. number; more may be stuck in squid mass",S. Crockford
Pv16.A040,Squid sp.,,", min. number; more may be stuck in squid mass",S. Crockford
Pv16.A041,Clupea pallasi,,", ",S. Crockford
Pv16.A041,Ammodytes hexapterus,,", ",S. Crockford
Pv16.A041,Merluccius productus,,", ",S. Crockford
Pv16.A042,Merluccius productus,,", ",S. Crockford
Pv16.A042,Gadus chalcogramma,,", ",S. Crockford
Pv16.A042,Squid sp.,,", ",S. Crockford
Pv16.A045,Clupea pallasi,,", ",S. Crockford
Pv16.A045,Merluccius productus,,", ",S. Crockford
Pv16.A046,Clupea pallasi,,", ",S. Crockford
Pv16.A046,Engraulis mordax,,", ",S. Crockford
Pv16.A047,Merluccius productus,,", ",S. Crockford
Pv16.A047,Engraulis mordax,,", ",S. Crockford
Pv16.A047,Clupea pallasi,,", ",S. Crockford
Pv16.A048,Clupea pallasi,,", ",S. Crockford
Pv16.A048,Gadus chalcogramma,,", ",S. Crockford
Pv16.A048,Merluccius productus,,", ",S. Crockford
Pv16.A049,Merluccius productus,,", ",S. Crockford
Pv16.A049,Clupea pallasi,,", ",S. Crockford
Pv16.A051,Gadus chalcogramma,,", low end of Vlg/high end of lg",S. Crockford
Pv16.A051,Merluccius productus,,", ",S. Crockford
Pv16.A055,Gadus chalcogramma,,", ",S. Crockford
Pv16.A056,Gadus chalcogramma,,", at least 2, one a bit bigger than the other",S. Crockford
Pv16.A057,Gadus chalcogramma,,", ",S. Crockford
Pv16.A057,Squid sp.,,", ",S. Crockford
Pv16.A058,Merluccius productus,,", ",S. Crockford
Pv16.A059,Merluccius productus,,", ",S. Crockford
Pv16.A059,Squid/Octopus,,", ",S. Crockford
Pv16.A060,Clupea pallasi,,", ",S. Crockford
Pv16.A060,Squalus acanthias,,", ",S. Crockford
Pv16.A060,Merluccius productus,,", ",S. Crockford
Pv16.A061,Merluccius productus,,", ",S. Crockford
Pv16.A062,Merluccius productus,,", ",S. Crockford
Pv16.A062,Squid/Octopus,,", may be more stuck in mass",S. Crockford
Pv16.A063,Clupea pallasi,,", ",S. Crockford
Pv16.A063,Merluccius productus,,", ",S. Crockford
Pv16.A064,Merluccius productus,,", ",S. Crockford
Pv16.A064,Gadus chalcogramma,,", ",S. Crockford
Pv16.A064,Lyopsetta exilis,,", ",S. Crockford
Pv16.A065,Clupea pallasi,,", ",S. Crockford
Pv16.A065,Merluccius productus,,", ",S. Crockford
Pv16.A066,Merluccius productus,,", ",S. Crockford
Pv16.A066,Clupea pallasi,,", ",S. Crockford
Pv16.A067,Merluccius productus,,", ",S. Crockford
Pv16.A068,Merluccius productus,,", ",S. Crockford
Pv16.A068,Squid/Octopus,,", ",S. Crockford
Pv16.A069,Merluccius productus,,", ",S. Crockford
Pv16.A070,Merluccius productus,,", ",S. Crockford
Pv16.A070,Squalus acanthias,,", ",S. Crockford
Pv16.A071,Merluccius productus,,", ",S. Crockford
Pv16.A071,Gadidae,,", ",S. Crockford
Pv16.A072,Merluccius productus,,", ",S. Crockford
Pv16.A073,Sebastes sp.,,", ",S. Crockford
Pv16.A073,Clupea pallasi,,", ",S. Crockford
Pv16.A074,Parophrys vetulus,,", ",S. Crockford
Pv16.A074,Squid sp.,,", ",S. Crockford
Pv16.A075,Merluccius productus,,", ",S. Crockford
Pv16.A075,Clupea pallasi,,", ",S. Crockford
Pv16.A076,Clupea pallasi,,", ",S. Crockford
Pv16.A077,Clupea pallasi,,", ",S. Crockford
Pv16.A078,Cymatogaster gracilis,,", ",S. Crockford
Pv16.A078,Aulorhynchus flavidus,,", ",S. Crockford
Pv16.A079,Clupea pallasi,,", ",S. Crockford
Pv16.A079,Merluccius productus,,", ",S. Crockford
Pv16.A080,Merluccius productus,,", ",S. Crockford
Pv16.A080,Clupea pallasi,,", ",S. Crockford
Pv16.A081,Merluccius productus,,", ",S. Crockford
Pv16.A082,Merluccius productus,,", ",S. Crockford
Pv16.A083,Cymatogaster gracilis,,", ",S. Crockford
Pv16.A084,Clupea pallasi,,", ",S. Crockford
Pv16.A084,Merluccius productus,,", ",S. Crockford
Pv16.A087,Clupea pallasi,,", ",S. Crockford
Pv16.A087,Ophiodon elongatus,,", almost certainly large lingcod but nothing truly distinctive",S. Crockford
Pv16.A089,Merluccius productus,,", ",S. Crockford
Pv16.A090,Merluccius productus,,", ",S. Crockford
Pv16.A090,Clupea pallasi,,", ",S. Crockford
Pv16.A091,Merluccius productus,,", ",S. Crockford
Pv16.A092,Merluccius productus,,", ",S. Crockford
Pv16.A093,Merluccius productus,,", ",S. Crockford
Pv16.A094,Ophiodon elongatus,,", most like lingcod",S. Crockford
Pv16.A094,Squid/Octopus,,", ",S. Crockford
Pv16.A095,Merluccius productus,,", ",S. Crockford
Pv16.A095,Gadus chalcogramma,,", ",S. Crockford
Pv16.A095,Clupea pallasi,,", ",S. Crockford
Pv16.A096,Merluccius productus,,", ",S. Crockford
Pv16.A096,Clupea pallasi,,", ",S. Crockford
Pv16.A097,Gadus chalcogramma,,", ",S. Crockford
Pv16.A098,Merluccius productus,,", ",S. Crockford
Pv16.A100,Merluccius productus,,", ",S. Crockford
Pv16.B001,Merluccius productus,,", ",S. Crockford
Pv16.B002,Merluccius productus,,", ",S. Crockford
Pv16.B003,Merluccius productus,,", ",S. Crockford
Pv16.B004,Merluccius productus,,", ",S. Crockford
Pv16.B005,Merluccius productus,,", ",S. Crockford
Pv16.B006,Merluccius productus,,", ",S. Crockford
Pv16.B007,Merluccius productus,,", ",S. Crockford
Pv16.B007,Clupea pallasi,,", ",S. Crockford
Pv16.B008,Clupea pallasi,,", ",S. Crockford
Pv16.B008,Merluccius productus,,", ",S. Crockford
Pv16.B010,Cymatogaster gracilis,,", ",S. Crockford
Pv16.B011,Cymatogaster gracilis,,", ",S. Crockford
Pv16.B011,Ammodytes hexapterus,,", ",S. Crockford
Pv16.B011,Gobiesox maendricus,,", ",S. Crockford
Pv16.B011,Leptocottus armatus,,", ",S. Crockford
Pv16.B011,Merluccius productus,,", ",S. Crockford
Pv16.B011,Squid sp.,,", ",S. Crockford
Pv16.B012,Merluccius productus,,", ",S. Crockford
Pv16.B012,Clupea pallasi,,", ",S. Crockford
Pv16.B013,Merluccius productus,,", ",S. Crockford
Pv16.B014,Lyopsetta exilis,,", ",S. Crockford
Pv16.B015,Merluccius productus,,", ",S. Crockford
Pv16.B016,Merluccius productus,,", ",S. Crockford
Pv16.B016,Squalus acanthias,,", ",S. Crockford
Pv16.B017,Merluccius productus,,", ",S. Crockford
Pv16.B018,Merluccius productus,,", ",S. Crockford
Pv16.B020,Ophiodon elongatus,,", ",S. Crockford
Pv16.B021,Ophiodon elongatus,,", ",S. Crockford
Pv16.B021,Oncorhynchus sp.,Adult,"Adult, ",S. Crockford
Pv16.B022,Merluccius productus,,", ",S. Crockford
Pv16.B023,Merluccius productus,,", ",S. Crockford
Pv16.B024,Merluccius productus,,", ",S. Crockford
Pv16.B024,Sardinops sagax,,", check these - most like sardine",S. Crockford
Pv16.B025,Merluccius productus,,", ",S. Crockford
Pv16.B025,Lyopsetta exilis,,", ",S. Crockford
Pv16.B026,Clupea pallasi,,", ",S. Crockford
Pv16.B026,Gadus chalcogramma,,", ",S. Crockford
Pv16.B026,Merluccius productus,,", ",S. Crockford
Pv16.B027,Merluccius productus,,", ",S. Crockford
Pv16.B027,Squid sp.,,", ",S. Crockford
Pv16.B028,Merluccius productus,,", ",S. Crockford
Pv16.B029,Merluccius productus,,", ",S. Crockford
Pv16.B030,Merluccius productus,,", ",S. Crockford
Pv16.B031,Merluccius productus,,", ",S. Crockford
Pv16.B032,Merluccius productus,,", ",S. Crockford
Pv16.B032,Squid/Octopus,,", ",S. Crockford
Pv16.B033,Sebastes sp.,,", ",S. Crockford
Pv16.B033,Clupea pallasi,,", ",S. Crockford
Pv16.B034,Hemilepidotus sp.,,", ",S. Crockford
Pv16.B034,Gadus chalcogramma,,", ",S. Crockford
Pv16.B034,Pholididae,,", ",S. Crockford
Pv16.B035,Hemilepidotus sp.,,", ",S. Crockford
Pv16.B036,Hemilepidotus sp.,,", ",S. Crockford
Pv16.B036,Gadus chalcogramma,,", ",S. Crockford
Pv16.B037,Merluccius productus,,", ",S. Crockford
Pv16.B037,Clupea pallasi,,", ",S. Crockford
Pv16.B038,Clupea pallasi,,", ",S. Crockford
Pv16.B038,Merluccius productus,,", ",S. Crockford
Pv16.B039,Pholididae,,", ",S. Crockford
Pv16.B039,Porichthys notatus,,", ",S. Crockford
Pv16.B040,Gadus chalcogramma,,", ",S. Crockford
Pv16.B040,Merluccius productus,,", ",S. Crockford
Pv16.B040,Clupea pallasi,,", ",S. Crockford
Pv16.B041,Clupea pallasi,,", ",S. Crockford
Pv16.B041,Porichthys notatus,,", ",S. Crockford
Pv16.B041,Gadus chalcogramma,,", ",S. Crockford
Pv16.B045,Merluccius productus,,", ",S. Crockford
Pv16.B045,Squid sp.,,", ",S. Crockford
Pv16.B045,Clupea pallasi,,", ",S. Crockford
Pv16.B046,Clupea pallasi,,", ",S. Crockford
Pv16.B046,Squid sp.,,", ",S. Crockford
Pv16.B046,Oncorhynchus sp.,Juvenile,"Juv, smolt sized",S. Crockford
Pv16.B047,Clupea pallasi,,", ",S. Crockford
Pv16.B047,Merluccius productus,,", ",S. Crockford
Pv16.B048,Merluccius productus,,", ",S. Crockford
Pv16.B049,Merluccius productus,,", ",S. Crockford
Pv16.B050,Gasterosteus aculaeatus,,", ",S. Crockford
Pv16.B051,Porichthys notatus,,", ",S. Crockford
Pv16.B051,Squid sp.,,", ",S. Crockford
Pv16.B051,Cymatogaster gracilis,,", smallest may be unborn",S. Crockford
Pv16.B052,Cymatogaster gracilis,,", ",S. Crockford
Pv16.B052,Porichthys notatus,,", ",S. Crockford
Pv16.B052,Raja sp.(unident),,", ",S. Crockford
Pv16.B052,Merluccius productus,,", ",S. Crockford
Pv16.B054,Clupea pallasi,,", ",S. Crockford
Pv16.B054,Merluccius productus,,", ",S. Crockford
Pv16.B055,Merluccius productus,,", ",S. Crockford
Pv16.B056,Pholididae,,", ",S. Crockford
Pv16.B057,Gasterosteus aculaeatus,,", ",S. Crockford
Pv16.B058,Oncorhynchus sp.,Adult,"Adult, ",S. Crockford
Pv16.B058,Sardinops sagax,,", definitely more like sardine than herring",S. Crockford
Pv16.B059,Merluccius productus,,", ",S. Crockford
Pv16.B060,Oncorhynchus sp.,Both,"Both, smallest is smolt sized",S. Crockford
Pv16.B061,Clupea pallasi,,", ",S. Crockford
Pv16.B063,Merluccius productus,,", ",S. Crockford
Pv16.B064,Merluccius productus,,", ",S. Crockford
Pv16.B065,Merluccius productus,,", ",S. Crockford
Pv16.B065,Clupea pallasi,,", ",S. Crockford
Pv16.B067,Merluccius productus,,", ",S. Crockford
Pv16.B068,Merluccius productus,,", ",S. Crockford
Pv16.B069,Clupea pallasi,,", ",S. Crockford
Pv16.B070,Clupea pallasi,,", ",S. Crockford
Pv16.B070,Merluccius productus,,", ",S. Crockford
Pv16.B071,Merluccius productus,,", ",S. Crockford
Pv16.B071,Clupea pallasi,,", ",S. Crockford
Pv16.B072,Merluccius productus,,", ",S. Crockford
Pv16.B072,Lampetra sp.,,", non diagnostic",S. Crockford
Pv16.B073,Merluccius productus,,", ",S. Crockford
Pv16.B074,Merluccius productus,,", ",S. Crockford
Pv16.B074,Clupea pallasi,,", ",S. Crockford
Pv16.B074,Oncorhynchus sp.,Juvenile,"Juv, larger than smolt size but not by much",S. Crockford
Pv16.B075,Merluccius productus,,", ",S. Crockford
Pv16.B076,Merluccius productus,,", ",S. Crockford
Pv16.B076,Clupea pallasi,,", ",S. Crockford
Pv16.B077,Merluccius productus,,", ",S. Crockford
Pv16.B078,Merluccius productus,,", ",S. Crockford
Pv16.B078,Clupea pallasi,,", ",S. Crockford
Pv16.B079,Clupea pallasi,,", ",S. Crockford
Pv16.B079,Merluccius productus,,", ",S. Crockford
Pv16.B081,Merluccius productus,,", ",S. Crockford
Pv16.B082,Merluccius productus,,", ",S. Crockford
Pv16.B083,Merluccius productus,,", ",S. Crockford
Pv16.B083,Squid sp.,,", ",S. Crockford
Pv16.B083,Clupea pallasi,,", ",S. Crockford
Pv16.B084,Clupea pallasi,,", ",S. Crockford
Pv16.B085,Clupea pallasi,,", ",S. Crockford
Pv16.B086,Merluccius productus,,", ",S. Crockford
Pv16.B087,Merluccius productus,,", ",S. Crockford
Pv16.B088,Sebastes sp.,,", ",S. Crockford
Pv16.B089,Clupea pallasi,,", ",S. Crockford
Pv16.B089,Engraulis mordax,,", ",S. Crockford
Pv16.B090,Gasterosteus aculaeatus,,", ",S. Crockford
Pv16.B090,Merluccius productus,,", ",S. Crockford
Pv16.B091,Merluccius productus,,", ",S. Crockford
Pv16.B092,Merluccius productus,,", ",S. Crockford
Pv16.B093,Merluccius productus,,", ",S. Crockford
Pv16.B094,Merluccius productus,,", ",S. Crockford
Pv16.B095,Merluccius productus,,", ",S. Crockford
Pv16.B095,Gadus chalcogramma,,", ",S. Crockford
Pv16.B095,Leptocottus armatus,,", ",S. Crockford
Pv16.B095,Clupea pallasi,,", ",S. Crockford
Pv16.B096,Clupea pallasi,,", ",S. Crockford
Pv16.B096,Cymatogaster gracilis,,", ",S. Crockford
Pv16.B096,Merluccius productus,,", ",S. Crockford
Pv16.B097,Merluccius productus,,", ",S. Crockford
Pv16.B097,Thaleichthys pacificus,,", ",S. Crockford
Pv16.B098,Clupea pallasi,,", ",S. Crockford
Pv16.B098,Merluccius productus,,", ",S. Crockford
Pv16.B099,Clupea pallasi,,", ",S. Crockford
Pv16.B100,Clupea pallasi,,", ",S. Crockford
Pv16.B100,Cymatogaster gracilis,,", ",S. Crockford
Pv16.B100,Leptocottus armatus,,", ",S. Crockford
Pv16.C001,Merluccius productus,,", ",S. Crockford
Pv16.C002,Merluccius productus,,", ",S. Crockford
Pv16.C002,Gadidae,,", could be hake or pollock, too eroded to tell",S. Crockford
Pv16.C002,Clupea pallasi,,", ",S. Crockford
Pv16.C003,Clupea pallasi,,", ",S. Crockford
Pv16.C004,Clupea pallasi,,", ",S. Crockford
Pv16.C004,Alosa sapidissima,,", ",S. Crockford
Pv16.C004,Merluccius productus,,", ",S. Crockford
Pv16.C004,Gadus chalcogramma,,", ",S. Crockford
Pv16.C005,Merluccius productus,,", ",S. Crockford
Pv16.C006,Merluccius productus,,", most of the otos are in good shape",S. Crockford
Pv16.C006,Clupea pallasi,,", ",S. Crockford
Pv16.C008,Oncorhynchus sp.,Juvenile,"Juv, ",S. Crockford
Pv16.C008,Leptocottus armatus,,", otos all the same side",S. Crockford
Pv16.C008,Squid sp.,,", ",S. Crockford
Pv16.C008,Porichthys notatus,,", no bone just otos",S. Crockford
Pv16.C008,Cymatogaster gracilis,,", ",S. Crockford
Pv16.C009,Clupea pallasi,,", ",S. Crockford
Pv16.C009,Merluccius productus,,", ",S. Crockford
Pv16.C010,Gadus macrocephalus,,", could be pollock but more like P.cod",S. Crockford
Pv16.C010,Microstomus pacificus,,", ",S. Crockford
Pv16.C010,Squid/Octopus,,", ",S. Crockford
Pv16.C010,Pisces (none of the above),,", definitely something bigger, to eroded to tell",S. Crockford
Pv16.C011,Squid/Octopus,,", ",S. Crockford
Pv16.C011,Raja sp.(unident),,", ",S. Crockford
Pv16.C011,Clupea pallasi,,", ",S. Crockford
Pv16.C011,Engraulis mordax,,", ",S. Crockford
Pv16.C011,Merluccius productus,,", ",S. Crockford
Pv16.C011,Gadus chalcogramma,,", ",S. Crockford
Pv16.C012,Merluccius productus,,", ",S. Crockford
Pv16.C013,Merluccius productus,,", ",S. Crockford
Pv16.C014,Merluccius productus,,", ",S. Crockford
Pv16.C016,Merluccius productus,,", ",S. Crockford
Pv16.C017,Merluccius productus,,", ",S. Crockford
Pv16.C017,Engraulis mordax,,", ",S. Crockford
Pv16.C018,Engraulis mordax,,", ",S. Crockford
Pv16.C018,Merluccius productus,,", ",S. Crockford
Pv16.C019,Hypomesus pretiosus,,", ",S. Crockford
Pv16.C019,Engraulis mordax,,", ",S. Crockford
Pv16.C019,Clupea pallasi,,", ",S. Crockford
Pv16.C019,Lampetra ayresii,,", diagnostic",S. Crockford
Pv16.C019,Gadus chalcogramma,,", ",S. Crockford
Pv16.C019,Merluccius productus,,", ",S. Crockford
Pv16.C020,Engraulis mordax,,", ",S. Crockford
Pv16.C020,Squid/Octopus,,", ",S. Crockford
Pv16.C020,Gasterosteus aculaeatus,,", ",S. Crockford
Pv16.C021,Gasterosteus aculaeatus,,", ",S. Crockford
Pv16.C021,Engraulis mordax,,", ",S. Crockford
Pv16.C021,Gadus chalcogramma,,", ",S. Crockford
Pv16.C022,Gadus chalcogramma,,", ",S. Crockford
Pv16.C022,Merluccius productus,,", ",S. Crockford
Pv16.C023,Gadus chalcogramma,,", ",S. Crockford
Pv16.C025,Merluccius productus,,", ",S. Crockford
Pv16.C027,Gadus chalcogramma,,", ",S. Crockford
Pv16.C027,Merluccius productus,,", ",S. Crockford
Pv16.C028,Gadus chalcogramma,,", ",S. Crockford
Pv16.C029,Gadus chalcogramma,,", ",S. Crockford
Pv16.C029,Merluccius productus,,", ",S. Crockford
Pv16.C030,Clupea pallasi,,", ",S. Crockford
Pv16.C030,Engraulis mordax,,", most like anchovy in overall shape",S. Crockford
Pv16.C030,Merluccius productus,,", ",S. Crockford
Pv16.C031,Merluccius productus,,", ",S. Crockford
Pv16.C031,Clupea pallasi,,", ",S. Crockford
Pv16.C031,Thaleichthys pacificus,,", ",S. Crockford
Pv16.C032,Clupea pallasi,,", ",S. Crockford
Pv16.C032,Merluccius productus,,", ",S. Crockford
Pv16.C033,Merluccius productus,,", ",S. Crockford
Pv16.C033,Clupea pallasi,,", ",S. Crockford
Pv16.C034,Clupea pallasi,,", ",S. Crockford
Pv16.C034,Cottus asper,,", a bit eroded could also be coastrange",S. Crockford
Pv16.C034,Porichthys notatus,,", ",S. Crockford
Pv16.C035,Porichthys notatus,,", ",S. Crockford
Pv16.C035,Clupea pallasi,,", ",S. Crockford
Pv16.C035,Merluccius productus,,", ",S. Crockford
Pv16.C036,Gadus chalcogramma,,", ",S. Crockford
Pv16.C036,Sebastes sp.,,", eroded but most like rockfish",S. Crockford
Pv16.C036,Cymatogaster gracilis,,", ",S. Crockford
Pv16.C036,Damalichthys vacca,,", definitely not shiner",S. Crockford
Pv16.C036,Porichthys notatus,,", ",S. Crockford
Pv16.C036,Clupea pallasi,,", ",S. Crockford
Pv16.C037,Sebastes sp.,,", ",S. Crockford
Pv16.C039,Clupea pallasi,,", ",S. Crockford
Pv16.C039,Hemilepidotus hemilepidotus,,", ",S. Crockford
Pv16.C039,Lycodes pacificus,,", ",S. Crockford
Pv16.C040,Porichthys notatus,,", ",S. Crockford
Pv16.C040,Merluccius productus,,", ",S. Crockford
Pv16.C041,Gadus chalcogramma,,", ",S. Crockford
Pv16.C042,Oncorhynchus sp.,Adult,"Adult, ",S. Crockford
Pv16.C043,Ammodytes hexapterus,,", ",S. Crockford
Pv16.C043,Gadus chalcogramma,,", ",S. Crockford
Pv16.C043,Clupea pallasi,,", ",S. Crockford
Pv16.C044,Merluccius productus,,", ",S. Crockford
Pv16.C045,Merluccius productus,,", ",S. Crockford
Pv16.C046,Merluccius productus,,", ",S. Crockford
Pv16.C047,Merluccius productus,,", ",S. Crockford
Pv16.C047,Clupea pallasi,,", ",S. Crockford
Pv16.C048,Merluccius productus,,", ",S. Crockford
Pv16.C050,Merluccius productus,,", ",S. Crockford
Pv16.C051,Merluccius productus,,", ",S. Crockford
Pv16.C052,Merluccius productus,,", ",S. Crockford
Pv16.C054,Merluccius productus,,", ",S. Crockford
Pv16.C054,Gadus chalcogramma,,", ",S. Crockford
Pv16.C054,Clupea pallasi,,", ",S. Crockford
Pv16.C056,Merluccius productus,,", ",S. Crockford
Pv16.C056,Clupea pallasi,,", ",S. Crockford
Pv16.C057,Merluccius productus,,", ",S. Crockford
Pv16.C057,Oncorhynchus sp.,Juvenile,"Juv, sm smolt size",S. Crockford
Pv16.C058,Merluccius productus,,", ",S. Crockford
Pv16.C060,Merluccius productus,,", ",S. Crockford
Pv16.C060,Cymatogaster gracilis,,", ",S. Crockford
Pv16.C060,Clupea pallasi,,", ",S. Crockford
Pv16.C060,Porichthys notatus,,", ",S. Crockford
Pv16.C061,Porichthys notatus,,", ",S. Crockford
Pv16.C061,Merluccius productus,,", ",S. Crockford
Pv16.C062,Cymatogaster gracilis,,", ",S. Crockford
Pv16.C062,Leptocottus armatus,,", ",S. Crockford
Pv16.C063,Clupea pallasi,,", ",S. Crockford
Pv16.C063,Lumpenus sagitta,,", ",S. Crockford
Pv16.C065,Merluccius productus,,", ",S. Crockford
Pv16.C066,Merluccius productus,,", ",S. Crockford
Pv16.C066,Gadus chalcogramma,,", ",S. Crockford
Pv16.C066,Clupea pallasi,,", ",S. Crockford
Pv16.C066,Porichthys notatus,,", ",S. Crockford
Pv16.C067,Porichthys notatus,,", only one",S. Crockford
Pv16.C067,Gadus chalcogramma,,", only one",S. Crockford
Pv16.C067,Leptocottus armatus,,", ",S. Crockford
Pv16.C067,Cymatogaster gracilis,,", 3 otos are tiny",S. Crockford
Pv16.C068,Cymatogaster gracilis,,", ",S. Crockford
Pv16.C069,Lumpenus sagitta,,", ",S. Crockford
Pv16.C070,Merluccius productus,,", ",S. Crockford
Pv16.C071,Merluccius productus,,", ",S. Crockford
Pv16.C072,Merluccius productus,,", ",S. Crockford
Pv16.C073,Merluccius productus,,", ",S. Crockford
Pv16.C074,Merluccius productus,,", ",S. Crockford
Pv16.C076,Merluccius productus,,", ",S. Crockford
Pv16.C077,Merluccius productus,,", ",S. Crockford
Pv16.C077,Clupea pallasi,,", ",S. Crockford
Pv16.C078,Merluccius productus,,", ",S. Crockford
Pv16.C079,Merluccius productus,,", ",S. Crockford
Pv16.C080,Pisces,,", ",S. Crockford
Pv16.C081,Gadus chalcogramma,,", ",S. Crockford
Pv16.C082,Oncorhynchus sp.,Adult,"Adult, ",S. Crockford
Pv16.C083,Merluccius productus,,", ",S. Crockford
Pv16.C084,Merluccius productus,,", ",S. Crockford
Pv16.C084,Alosa sapidissima,,", ",S. Crockford
Pv16.C084,Oncorhynchus sp.,Adult,"Adult, ",S. Crockford
Pv16.C084,Gadus chalcogramma,,", ",S. Crockford
Pv16.C084,Damalichthys vacca,,", very eroded but diagnostic to family at least",S. Crockford
Pv16.C085,Damalichthys vacca,,", very eroded but diagnostic to family at least",S. Crockford
Pv16.C085,Alosa sapidissima,,", ",S. Crockford
Pv16.C085,Clupea pallasi,,", ",S. Crockford
Pv16.C085,Oncorhynchus sp.,Adult,"Adult, ",S. Crockford
Pv16.C086,Thaleichthys pacificus,,", ",S. Crockford
Pv16.C086,Gadus chalcogramma,,", ",S. Crockford
Pv16.C086,Merluccius productus,,", ",S. Crockford
Pv16.C086,Pisces (none of the above),,", could be vlg gadid or rockfish",S. Crockford
Pv16.C088,Gadus chalcogramma,,", ",S. Crockford
Pv16.C090,Merluccius productus,,", ",S. Crockford
Pv16.C091,Merluccius productus,,", ",S. Crockford
Pv16.C091,Clupea pallasi,,", ",S. Crockford
Pv16.C092,Merluccius productus,,", ",S. Crockford
Pv16.C093,Merluccius productus,,", ",S. Crockford
Pv16.C094,Merluccius productus,,", ",S. Crockford
Pv16.C095,Merluccius productus,,", ",S. Crockford
Pv16.C096,Merluccius productus,,", ",S. Crockford
Pv16.C097,Merluccius productus,,", ",S. Crockford
Pv16.C098,Merluccius productus,,", ",S. Crockford
Pv16.C099,Merluccius productus,,", ",S. Crockford
Pv16.D001,Merluccius productus,,", ",S. Crockford
Pv16.D002,Merluccius productus,,", ",S. Crockford
Pv16.D003,Merluccius productus,,", ",S. Crockford
Pv16.D004,Merluccius productus,,", ",S. Crockford
Pv16.D005,Merluccius productus,,", odd but true: same number of otos as previous sample!",S. Crockford
Pv16.D007,Merluccius productus,,", ",S. Crockford
Pv16.D008,Merluccius productus,,", ",S. Crockford
Pv16.D009,Merluccius productus,,", ",S. Crockford
Pv16.D010,Merluccius productus,,", ",S. Crockford
Pv16.D011,Merluccius productus,,", ",S. Crockford
Pv16.D011,Squid sp.,,", ",S. Crockford
Pv16.D012,Merluccius productus,,", ",S. Crockford
Pv16.D013,Merluccius productus,,", ",S. Crockford
Pv16.D013,Squid/Octopus,,", ",S. Crockford
Pv16.D014,Merluccius productus,,", ",S. Crockford
Pv16.D015,Merluccius productus,,", ",S. Crockford
Pv16.D016,Merluccius productus,,", ",S. Crockford
Pv16.D017,Merluccius productus,,", ",S. Crockford
Pv16.D018,Merluccius productus,,", ",S. Crockford
Pv16.D019,Merluccius productus,,", ",S. Crockford
Pv16.D020,Merluccius productus,,", ",S. Crockford
Pv16.D022,Merluccius productus,,", ",S. Crockford
Pv16.D023,Pisces,,", MOLDY NOT DONE",S. Crockford
Pv16.D024,Merluccius productus,,", ",S. Crockford
Pv16.D024,Lampetra ayresii,,", diagnostic",S. Crockford
Pv16.D024,Porichthys notatus,,", ",S. Crockford
Pv16.D027,Clupea pallasi,,", ",S. Crockford
Pv16.D027,Oncorhynchus sp.,Juvenile,"Juv, otos same side",S. Crockford
Pv16.D029,Clupea pallasi,,", only one vert",S. Crockford
Pv16.D029,Merluccius productus,,", ",S. Crockford
Pv16.D030,Merluccius productus,,", ",S. Crockford
Pv16.D030,Clupea pallasi,,", ",S. Crockford
Pv16.D030,Alosa sapidissima,,", ",S. Crockford
Pv16.D032,Merluccius productus,,", ",S. Crockford
Pv16.D033,Clupea pallasi,,", ",S. Crockford
Pv16.D034,Merluccius productus,,", ",S. Crockford
Pv16.D035,Porichthys notatus,,", ",S. Crockford
Pv16.D035,Squid sp.,,", ",S. Crockford
Pv16.D035,Clupea pallasi,,", ",S. Crockford
Pv16.D036,Merluccius productus,,", ",S. Crockford
Pv16.D037,Clupea pallasi,,", ",S. Crockford
Pv16.D038,Clupea pallasi,,", ",S. Crockford
Pv16.D038,Alosa sapidissima,,", ",S. Crockford
Pv16.D039,Merluccius productus,,", ",S. Crockford
Pv16.D039,Porichthys notatus,,", quite eroded but definitely not hake and most like a vlg midshipman",S. Crockford
Pv16.D042,Merluccius productus,,", ",S. Crockford
Pv16.D043,Merluccius productus,,", otos are same side",S. Crockford
Pv16.D044,Merluccius productus,,", ",S. Crockford
Pv16.D045,Merluccius productus,,", ",S. Crockford
Pv16.D047,Merluccius productus,,", ",S. Crockford
Pv16.D048,Merluccius productus,,", ",S. Crockford
Pv16.D048,Clupea pallasi,,", ",S. Crockford
Pv16.D049,Clupea pallasi,,", ",S. Crockford
Pv16.D049,Merluccius productus,,", ",S. Crockford
Pv16.D050,Merluccius productus,,", ",S. Crockford
Pv16.D051,Merluccius productus,,", ",S. Crockford
Pv16.D052,Merluccius productus,,", ",S. Crockford
Pv16.D053,Merluccius productus,,", ",S. Crockford
Pv16.D054,Merluccius productus,,", ",S. Crockford
Pv16.D056,Merluccius productus,,", ",S. Crockford
Pv16.D058,Merluccius productus,,", ",S. Crockford
Pv16.D060,Merluccius productus,,", ",S. Crockford
Pv16.D062,Merluccius productus,,", ",S. Crockford
Pv16.D063,Merluccius productus,,", ",S. Crockford
Pv16.D064,Merluccius productus,,", ",S. Crockford
Pv16.D066,Merluccius productus,,", ",S. Crockford
Pv16.D066,Oncorhynchus sp.,Juvenile,"Juv, ",S. Crockford
Pv16.D067,Merluccius productus,,", ",S. Crockford
Pv16.D068,Merluccius productus,,", ",S. Crockford
Pv16.D068,Clupea pallasi,,", ",S. Crockford
Pv16.D069,Merluccius productus,,", ",S. Crockford
Pv16.D070,Merluccius productus,,", ",S. Crockford
Pv16.D072,Merluccius productus,,", ",S. Crockford
Pv16.D072,Oncorhynchus sp.,Adult,"Adult, ",S. Crockford
Pv16.D073,Merluccius productus,,", ",S. Crockford
Pv16.D074,Merluccius productus,,", ",S. Crockford
Pv16.D075,Merluccius productus,,", ",S. Crockford
Pv16.D077,Merluccius productus,,", ",S. Crockford
Pv16.D078,Merluccius productus,,", ",S. Crockford
Pv16.D080,Merluccius productus,,", ",S. Crockford
Pv16.D080,Clupea pallasi,,", ",S. Crockford
Pv16.D081,Merluccius productus,,", ",S. Crockford
Pv16.D082,Merluccius productus,,", ",S. Crockford
Pv16.D084,Merluccius productus,,", ",S. Crockford
Pv16.D084,Engraulis mordax,,", ",S. Crockford
Pv16.D085,Merluccius productus,,", ",S. Crockford
Pv16.D086,Merluccius productus,,", ",S. Crockford
Pv16.D086,Porichthys notatus,,", ",S. Crockford
Pv16.D087,Gadus chalcogramma,,", ",S. Crockford
Pv16.D087,Merluccius productus,,", ",S. Crockford
Pv16.D088,Merluccius productus,,", ",S. Crockford
Pv16.D088,Lampetra ayresii,,", diagnostic",S. Crockford
Pv16.D088,Clupea pallasi,,", ",S. Crockford
Pv16.D089,Merluccius productus,,", ",S. Crockford
Pv16.D090,Merluccius productus,,", ",S. Crockford
Pv16.D092,Merluccius productus,,", ",S. Crockford
Pv16.D093,Merluccius productus,,", ",S. Crockford
Pv16.D094,Merluccius productus,,", ",S. Crockford
Pv16.D095,Merluccius productus,,", ",S. Crockford
Pv16.D096,Merluccius productus,,", ",S. Crockford
Pv16.D097,Merluccius productus,,", ",S. Crockford
Pv16.D099,Merluccius productus,,", ",S. Crockford
Pv16.E001,Merluccius productus,,", ",S. Crockford
Pv16.E001,Oncorhynchus sp.,Juvenile,"Juv, ",S. Crockford
Pv16.E002,Merluccius productus,,", ",S. Crockford
Pv16.E003,Merluccius productus,,", ",S. Crockford
Pv16.E004,Merluccius productus,,", ",S. Crockford
Pv16.E005,Merluccius productus,,", ",S. Crockford
Pv16.E007,Merluccius productus,,", ",S. Crockford
Pv16.E007,Lampetra ayresii,,", diagnostic teeth for this species",S. Crockford
Pv16.E007,Engraulis mordax,,", ",S. Crockford
Pv16.E008,Merluccius productus,,", ",S. Crockford
Pv16.E009,Lampetra ayresii,,", diagnostic teeth for this species",S. Crockford
Pv16.E009,Merluccius productus,,", ",S. Crockford
Pv16.E010,Merluccius productus,,", ",S. Crockford
Pv16.E011,Clupea pallasi,,", ",S. Crockford
Pv16.E012,Clupea pallasi,,", ",S. Crockford
Pv16.E012,Merluccius productus,,", ",S. Crockford
Pv16.E013,Merluccius productus,,", ",S. Crockford
Pv16.E013,Clupea pallasi,,", ",S. Crockford
Pv16.E014,Lampetra sp.,,", not diagnostic",S. Crockford
Pv16.E014,Merluccius productus,,", ",S. Crockford
Pv16.E015,Merluccius productus,,", ",S. Crockford
Pv16.E015,Oncorhynchus sp.,Juvenile,"Juv, a few vert rims are much larger than the others",S. Crockford
Pv16.E015,Lampetra ayresii,,", diagnostic",S. Crockford
Pv16.E016,Pisces,,", just scales",S. Crockford
Pv16.E017,Pisces,,", ",S. Crockford
Pv16.E018,Squid/Octopus,,", ",S. Crockford
Pv16.E018,Clupea pallasi,,", ",S. Crockford
Pv16.E018,Gadus chalcogramma,,", ",S. Crockford
Pv16.E018,Merluccius productus,,", ",S. Crockford
Pv16.E019,Gadus chalcogramma,,", ",S. Crockford
Pv16.E019,Oncorhynchus sp.,Juvenile,"Juv, ",S. Crockford
Pv16.E019,Microstomus pacificus,,", ",S. Crockford
Pv16.E019,"Pleuronectid (not ID'd, 01)",,", oto large, broken, incolmplete; could be rock sole",S. Crockford
Pv16.E020,Merluccius productus,,", ",S. Crockford
Pv16.E021,Xiphister atropurpures,,", ",S. Crockford
Pv16.E021,Merluccius productus,,", ",S. Crockford
Pv16.E022,Merluccius productus,,", ",S. Crockford
Pv16.E022,Clupea pallasi,,", ",S. Crockford
Pv16.E023,Gadus chalcogramma,,", ",S. Crockford
Pv16.E023,Merluccius productus,,", ",S. Crockford
Pv16.E024,Lycodes brevipes,,", robust bone, vert with single bar; might be another species",S. Crockford
Pv16.E024,Clupea pallasi,,", ",S. Crockford
Pv16.E024,Squid sp.,,", ",S. Crockford
Pv16.E024,Gobiidae,,", definitely a goby but we only have one specie (Bay goby) and neither of the bones represented here are diagnostic enough",S. Crockford
Pv16.E024,Lyopsetta exilis,,", ",S. Crockford
Pv16.E025,Lampetra ayresii,,", diagnostic",S. Crockford
Pv16.E025,Merluccius productus,,", ",S. Crockford
Pv16.E025,Clupea pallasi,,", ",S. Crockford
Pv16.E026,Merluccius productus,,", ",S. Crockford
Pv16.E027,Clupea pallasi,,", ",S. Crockford
Pv16.E028,Merluccius productus,,", ",S. Crockford
Pv16.E028,Gadus chalcogramma,,", ",S. Crockford
Pv16.E028,Lampetra ayresii,,", diagnostic",S. Crockford
Pv16.E028,Oncorhynchus sp.,Juvenile,"Juv, ",S. Crockford
Pv16.E029,Engraulis mordax,,", ",S. Crockford
Pv16.E029,Lampetra ayresii,,", diagnostic",S. Crockford
Pv16.E029,Squid sp.,,", ",S. Crockford
Pv16.E029,Merluccius productus,,", most of these otos are broken and/or eroded",S. Crockford
Pv16.E031,Merluccius productus,,", ",S. Crockford
Pv16.E031,Clupea pallasi,,", ",S. Crockford
Pv16.E031,Engraulis mordax,,", ",S. Crockford
Pv16.E031,Coryphopterus nicholsii,,", def. a goby but vomer not a good match for bay species, and two atlases much too large to be bay (blackeye gets larger)",S. Crockford
Pv16.E031,"Cottidae (not above sp,unkn01)",,", a small species, otolith with conspicuous notch in the top",S. Crockford
Pv16.E031,"Cottidae (not above sp,unkn02)",,", a small species, otolith pointed at both ends, NO notch in the top",S. Crockford
Pv16.E032,Clupea pallasi,,", Only one vial, not two [other vial is D32]",S. Crockford
Pv16.E032,Merluccius productus,,", ",S. Crockford
Pv16.E033,Clupea pallasi,,", ",S. Crockford
Pv16.E034,Hippoglossoides elassodon,,", most of these are most like flathead but could be others mixed in; some are quite eroded",S. Crockford
Pv16.E034,Gadus chalcogramma,,", ",S. Crockford
Pv16.E035,Cottidae,,", ",S. Crockford
Pv16.E036,Gadus chalcogramma,,", otos broken & eroded",S. Crockford
Pv16.E036,Merluccius productus,,", ",S. Crockford
Pv16.E036,Lampetra ayresii,,", diagnostic",S. Crockford
Pv16.E036,Squid sp.,,", ",S. Crockford
Pv16.E037,Coryphopterus nicholsii,,", def. goby but not a good match for bay goby",S. Crockford
Pv16.E037,Lampetra ayresii,,", ",S. Crockford
Pv16.E037,Gadus chalcogramma,,", otos are small, gillraker (1 only) is lg/vlg",S. Crockford
Pv16.E037,Clupea pallasi,,", ",S. Crockford
Pv16.E037,Engraulis mordax,,", ",S. Crockford
Pv16.E038,Porichthys notatus,,", ",S. Crockford
Pv16.E038,Leptocottus armatus,,", ",S. Crockford
Pv16.E038,Cymatogaster gracilis,,", ",S. Crockford
Pv16.E038,Lumpenus sagitta,,", ",S. Crockford
Pv16.E038,Oncorhynchus sp.,Juvenile,"Juv, ",S. Crockford
Pv16.E038,Clupea pallasi,,", ",S. Crockford
Pv16.E038,Gadus chalcogramma,,", ",S. Crockford
Pv16.E038,Merluccius productus,,", ",S. Crockford
Pv16.E039,Gadus chalcogramma,,", ",S. Crockford
Pv16.E039,Merluccius productus,,", ",S. Crockford
Pv16.E040,Merluccius productus,,", ",S. Crockford
Pv16.E040,Gadus chalcogramma,,", ",S. Crockford
Pv16.E040,Alosa sapidissima,,", size of a lg greenling, prob. > 40 cm",S. Crockford
Pv16.E041,Porichthys notatus,,", ",S. Crockford
Pv16.E041,Merluccius productus,,", ",S. Crockford
Pv16.E042,Merluccius productus,,", ",S. Crockford
Pv16.E043,Merluccius productus,,", ",S. Crockford
Pv16.E043,Clupea pallasi,,", ",S. Crockford
Pv16.E044,Clupea pallasi,,", ",S. Crockford
Pv16.E044,Porichthys notatus,,", ",S. Crockford
Pv16.E044,Merluccius productus,,", ",S. Crockford
Pv16.E045,Merluccius productus,,", ",S. Crockford
Pv16.E046,Merluccius productus,,", ",S. Crockford
Pv16.E047,Merluccius productus,,", ",S. Crockford
Pv16.E050,Merluccius productus,,", ",S. Crockford
Pv16.E050,Oncorhynchus sp.,Adult,"Adult, ",S. Crockford
Pv16.E051,Oncorhynchus sp.,Adult,"Adult, ",S. Crockford
Pv16.E051,Merluccius productus,,", ",S. Crockford
Pv16.E052,Merluccius productus,,", ",S. Crockford
Pv16.E053,Merluccius productus,,", ",S. Crockford
Pv16.E053,Clupea pallasi,,", ",S. Crockford
Pv16.E054,Merluccius productus,,", ",S. Crockford
Pv16.E055,Merluccius productus,,", ",S. Crockford
Pv16.E057,Merluccius productus,,", ",S. Crockford
Pv16.E059,Merluccius productus,,", ",S. Crockford
Pv16.E060,Merluccius productus,,", ",S. Crockford
Pv16.E060,Clupea pallasi,,", ",S. Crockford
Pv16.E061,Clupea pallasi,,", ",S. Crockford
Pv16.E061,Porichthys notatus,,", ",S. Crockford
Pv16.E061,Merluccius productus,,", ",S. Crockford
Pv16.E062,Merluccius productus,,", ",S. Crockford
Pv16.E062,Clupea pallasi,,", ",S. Crockford
Pv16.E063,Merluccius productus,,", ",S. Crockford
Pv16.E064,Merluccius productus,,", ",S. Crockford
Pv16.E064,Clupea pallasi,,", ",S. Crockford
Pv16.E065,Clupea pallasi,,", ",S. Crockford
Pv16.E065,Merluccius productus,,", ",S. Crockford
Pv16.E066,Merluccius productus,,", ",S. Crockford
Pv16.E067,Merluccius productus,,", ",S. Crockford
Pv16.E067,Gadus chalcogramma,,", ",S. Crockford
Pv16.E067,Clupea pallasi,,", ",S. Crockford
Pv16.E067,Porichthys notatus,,", ",S. Crockford
Pv16.E068,Clupea pallasi,,", ",S. Crockford
Pv16.E068,Merluccius productus,,", ",S. Crockford
Pv16.E070,Merluccius productus,,", ",S. Crockford
Pv16.E071,Merluccius productus,,", ",S. Crockford
Pv16.E071,Clupea pallasi,,", ",S. Crockford
Pv16.E072,Merluccius productus,,", ",S. Crockford
Pv16.E074,Clupea pallasi,,", ",S. Crockford
Pv16.E074,Cymatogaster gracilis,,", ",S. Crockford
Pv16.E074,Merluccius productus,,", ",S. Crockford
Pv16.E075,Merluccius productus,,", ",S. Crockford
Pv16.E075,Lampetra ayresii,,", diagnostic",S. Crockford
Pv16.E075,Clupea pallasi,,", ",S. Crockford
Pv16.E076,Clupea pallasi,,", ",S. Crockford
Pv16.E076,Merluccius productus,,", ",S. Crockford
Pv16.E077,Merluccius productus,,", ",S. Crockford
Pv16.E078,Merluccius productus,,", ",S. Crockford
Pv16.E078,Clupea pallasi,,", ",S. Crockford
Pv16.E079,Clupea pallasi,,", ",S. Crockford
Pv16.E079,Merluccius productus,,", ",S. Crockford
Pv16.E079,Ammodytes hexapterus,,", ",S. Crockford
Pv16.E080,Clupea pallasi,,", ",S. Crockford
Pv16.E080,Merluccius productus,,", ",S. Crockford
Pv16.E081,Merluccius productus,,", ",S. Crockford
Pv16.E081,Clupea pallasi,,", ",S. Crockford
Pv16.E083,Merluccius productus,,", ",S. Crockford
Pv16.E083,Clupea pallasi,,", ",S. Crockford
Pv16.E084,Gadus chalcogramma,,", ",S. Crockford
Pv16.E084,Merluccius productus,,", ",S. Crockford
Pv16.E084,Clupea pallasi,,", ",S. Crockford
Pv16.E085,Sardinops sagax,,", ",S. Crockford
Pv16.E085,Gadus chalcogramma,,", ",S. Crockford
[truncated: 279,814 more chars]
